# Supplementary material for: Mitochondrial Breast Cancer Resistant Protein Sustains the Proliferation and Survival of Drug-Resistant Breast Cancer Cells by Regulating Intracellular Reactive Oxygen Species
Source: Front Cell Dev Biol. 2021 Sep 28;9:719209. doi: 10.3389/fcell.2021.719209 (PMC8505676; doi:10.3389/fcell.2021.719209)
Supplement: Supplementary file 4 [file Table_4.XLSX]

## Sheet: Sheet1
Supplementary Table S4. RNA-Seq analysis results for SK/EPI-siControl and SK/EPI-siBCRP #1 cells
Gene ID	siBCRP rep 1 (normalized count)	siBCRP rep 2 (normalized count)	siBCRP rep 3 (normalized count)	siNC rep 1 (normalized count)	siNC rep 2 (normalized count)	siNC rep 3 (normalized count)	Average siBCRP (normalized count)	Average siNC (normalized count)	log2 Fold Change	P value	Adjusted P Value	Gene symbol	Gene type	Gene description
ENSG00000099194	18114.9	18770	18786.7	9383.99	9614.86	9719.53	18557.2	9572.79	0.955406	0	0	SCD	protein_coding	stearoyl-CoA desaturase [Source:HGNC Symbol;Acc:HGNC:10571]
ENSG00000131473	9145.44	9644.89	9620.38	4136.78	4099.19	3915.23	9470.23	4050.4	1.22514	0	0	ACLY	protein_coding	ATP citrate lyase [Source:HGNC Symbol;Acc:HGNC:115]
ENSG00000132475	5994.29	6037.88	6015.37	14619.6	14080.7	13885.2	6015.85	14195.2	-1.23882	0	0	H3F3B	protein_coding	H3 histone family member 3B [Source:HGNC Symbol;Acc:HGNC:4765]
ENSG00000122565	5544.88	5661.82	5680.36	11862.7	11492.9	11731.2	5629.02	11695.6	-1.05512	0	0	CBX3	protein_coding	chromobox 3 [Source:HGNC Symbol;Acc:HGNC:1553]
ENSG00000185896	1646.81	1654.34	1586.54	9627.59	9342.01	9475.28	1629.23	9481.63	-2.54053	0	0	LAMP1	protein_coding	lysosomal associated membrane protein 1 [Source:HGNC Symbol;Acc:HGNC:6499]
ENSG00000118777	292.277	356.18	299.188	3319.74	3347.78	3462.79	315.882	3376.77	-3.41163	0	0	ABCG2	protein_coding	ATP binding cassette subfamily G member 2 (Junior blood group) [Source:HGNC Symbol;Acc:HGNC:74]
ENSG00000072274	51522.4	52701.1	53235.5	30485.7	31579.5	31510.4	52486.3	31191.9	0.750978	1.06894e-305	2.52285e-302	TFRC	protein_coding	transferrin receptor [Source:HGNC Symbol;Acc:HGNC:11763]
ENSG00000163283	21508	20660.3	20650.3	11109.6	11320.2	11507.6	20939.5	11312.5	0.88846	1.22057e-301	2.52063e-298	ALPP	protein_coding	alkaline phosphatase, placental [Source:HGNC Symbol;Acc:HGNC:439]
ENSG00000110955	33422.2	34001.6	34113.8	21175.5	21394.4	21547.7	33845.9	21372.5	0.663375	1.09515e-275	2.01034e-272	ATP5F1B	protein_coding	ATP synthase F1 subunit beta [Source:HGNC Symbol;Acc:HGNC:830]
ENSG00000156508	69184.8	71790.2	71977.9	108616	110890	108947	70984.3	109484	-0.625085	2.41916e-244	3.9967e-241	EEF1A1	protein_coding	eukaryotic translation elongation factor 1 alpha 1 [Source:HGNC Symbol;Acc:HGNC:3189]
ENSG00000101856	1712.81	1674.23	1692.94	4432.83	4268.65	4213.07	1693.32	4304.85	-1.34695	1.11524e-239	1.67499e-236	PGRMC1	protein_coding	progesterone receptor membrane component 1 [Source:HGNC Symbol;Acc:HGNC:16090]
ENSG00000171530	433.701	416.749	442.461	1882.13	1890.78	1909.69	430.97	1894.2	-2.13725	8.98912e-236	1.23758e-232	TBCA	protein_coding	tubulin folding cofactor A [Source:HGNC Symbol;Acc:HGNC:11579]
ENSG00000112697	621.219	618.343	565.719	2166.63	2276.62	2244.63	601.76	2229.29	-1.88771	1.19874e-217	1.52342e-214	TMEM30A	protein_coding	transmembrane protein 30A [Source:HGNC Symbol;Acc:HGNC:16667]
ENSG00000165389	4141.11	4147.6	4193.9	8787.43	8253.8	8162.3	4160.87	8401.18	-1.01434	2.42161e-207	2.85768e-204	SPTSSA	protein_coding	serine palmitoyltransferase small subunit A [Source:HGNC Symbol;Acc:HGNC:20361]
ENSG00000102996	9689.14	9057.28	8948.26	4767.12	4710.97	4592.33	9231.56	4690.14	0.976498	1.66636e-189	1.83533e-186	MMP15	protein_coding	matrix metallopeptidase 15 [Source:HGNC Symbol;Acc:HGNC:7161]
ENSG00000129988	2661.92	2721.07	2657.93	5453.47	5477.31	5789.88	2680.31	5573.55	-1.05556	1.56287e-183	1.61376e-180	LBP	protein_coding	lipopolysaccharide binding protein [Source:HGNC Symbol;Acc:HGNC:6517]
ENSG00000271503	3931.6	3772.43	3839.93	1708.77	1660.56	1713.88	3847.99	1694.4	1.1826	1.13831e-180	1.10624e-177	CCL5	protein_coding	C-C motif chemokine ligand 5 [Source:HGNC Symbol;Acc:HGNC:10632]
ENSG00000130487	8436.22	7796.18	7725.17	3870.95	3943.58	4005.92	7985.86	3940.15	1.01929	3.52944e-179	3.23944e-176	KLHDC7B	protein_coding	kelch domain containing 7B [Source:HGNC Symbol;Acc:HGNC:25145]
ENSG00000105825	11729.8	11694.3	11666.2	18823.1	18060.5	18185.9	11696.8	18356.5	-0.650483	2.27649e-177	1.97946e-174	TFPI2	protein_coding	tissue factor pathway inhibitor 2 [Source:HGNC Symbol;Acc:HGNC:11761]
ENSG00000166165	7024.07	6705.95	6692.76	3606.01	3620.63	3565.85	6807.59	3597.5	0.91992	4.95385e-177	4.09212e-174	CKB	protein_coding	creatine kinase B [Source:HGNC Symbol;Acc:HGNC:1991]
ENSG00000117632	698.741	658.119	769.04	2315.99	2321.38	2236.39	708.633	2291.25	-1.69555	1.16815e-175	9.19001e-173	STMN1	protein_coding	stathmin 1 [Source:HGNC Symbol;Acc:HGNC:6510]
ENSG00000170540	2082.6	2139.79	2190.18	4484.4	4469.03	4440.83	2137.53	4464.75	-1.06271	1.85783e-174	1.39514e-171	ARL6IP1	protein_coding	ADP ribosylation factor like GTPase 6 interacting protein 1 [Source:HGNC Symbol;Acc:HGNC:697]
ENSG00000100345	5221.18	4891.6	5009.3	8819.44	8825.08	8885.78	5040.69	8843.43	-0.81156	3.16034e-165	2.27009e-162	MYH9	protein_coding	myosin heavy chain 9 [Source:HGNC Symbol;Acc:HGNC:7579]
ENSG00000132824	2104.6	2076.51	2115.39	4236.35	4501	4465.56	2098.83	4400.97	-1.06786	1.32694e-159	9.13434e-157	SERINC3	protein_coding	serine incorporator 3 [Source:HGNC Symbol;Acc:HGNC:11699]
ENSG00000277443	1624.81	1586.54	1685.57	3699.36	3544.95	3768.88	1632.3	3671.07	-1.17035	6.68621e-157	4.41852e-154	MARCKS	protein_coding	myristoylated alanine rich protein kinase C substrate [Source:HGNC Symbol;Acc:HGNC:6759]
ENSG00000123989	5480.98	5104.04	5167.32	2671.61	2692.29	2655.84	5250.78	2673.25	0.973598	8.48011e-149	5.38845e-146	CHPF	protein_coding	chondroitin polymerizing factor [Source:HGNC Symbol;Acc:HGNC:24291]
ENSG00000143384	4007.02	4215.4	4196.01	7046.66	7208.22	7178.08	4139.48	7144.32	-0.786713	4.58018e-140	2.80256e-137	MCL1	protein_coding	MCL1, BCL2 family apoptosis regulator [Source:HGNC Symbol;Acc:HGNC:6943]
ENSG00000153395	7359.3	7015.12	7200.53	4156.34	4159.94	4279.02	7191.65	4198.43	0.776281	6.34172e-136	3.74184e-133	LPCAT1	protein_coding	lysophosphatidylcholine acyltransferase 1 [Source:HGNC Symbol;Acc:HGNC:25718]
ENSG00000170248	1440.43	1542.24	1460.12	3171.26	3134.61	3228.85	1480.93	3178.24	-1.10053	8.96559e-132	5.10761e-129	PDCD6IP	protein_coding	programmed cell death 6 interacting protein [Source:HGNC Symbol;Acc:HGNC:8766]
ENSG00000137801	1579.76	1557.61	1555.99	3213.05	3310.47	3443.21	1564.45	3322.24	-1.08609	3.46249e-131	1.90679e-128	THBS1	protein_coding	thrombospondin 1 [Source:HGNC Symbol;Acc:HGNC:11785]
ENSG00000158710	7464.06	7408.36	7320.63	11062.5	11295.7	11331.4	7397.68	11229.9	-0.601921	1.20032e-128	6.39692e-126	TAGLN2	protein_coding	transgelin 2 [Source:HGNC Symbol;Acc:HGNC:11554]
ENSG00000165678	4407.2	4340.15	4356.14	2356.89	2220.13	2344.6	4367.83	2307.2	0.919868	2.35826e-128	1.21752e-125	GHITM	protein_coding	growth hormone inducible transmembrane protein [Source:HGNC Symbol;Acc:HGNC:17281]
ENSG00000013588	2195.74	2209.4	2256.55	4174.12	4540.44	4420.22	2220.57	4378.26	-0.978769	9.24083e-126	4.6263e-123	GPRC5A	protein_coding	G protein-coupled receptor class C group 5 member A [Source:HGNC Symbol;Acc:HGNC:9836]
ENSG00000143153	8430.98	8425.38	8252.96	5351.23	5312.1	5274.58	8369.77	5312.64	0.655713	1.16788e-125	5.67489e-123	ATP1B1	protein_coding	ATPase Na+/K+ transporting subunit beta 1 [Source:HGNC Symbol;Acc:HGNC:804]
ENSG00000103257	15094.7	14567.2	14578.1	10029.4	10002.8	9955.53	14746.7	9995.93	0.560778	9.43601e-125	4.45407e-122	SLC7A5	protein_coding	solute carrier family 7 member 5 [Source:HGNC Symbol;Acc:HGNC:11063]
ENSG00000124102	1651	1603.71	1670.82	3568.67	3388.28	3316.45	1641.84	3424.47	-1.0619	3.1077e-124	1.42617e-121	PI3	protein_coding	peptidase inhibitor 3 [Source:HGNC Symbol;Acc:HGNC:8947]
ENSG00000106211	31806.8	30080	31219.9	20828.8	20133.6	19344.2	31035.6	20102.2	0.626199	7.24715e-122	3.23595e-119	HSPB1	protein_coding	heat shock protein family B (small) member 1 [Source:HGNC Symbol;Acc:HGNC:5246]
ENSG00000181458	664.17	668.064	652.104	1729.21	1767.15	1719.03	661.446	1738.46	-1.39358	3.9001e-119	1.69562e-116	TMEM45A	protein_coding	transmembrane protein 45A [Source:HGNC Symbol;Acc:HGNC:25480]
ENSG00000144381	19169.8	19333.2	19634.8	13246.9	13598.9	13827.5	19379.2	13557.8	0.515678	8.23835e-115	3.48989e-112	HSPD1	protein_coding	heat shock protein family D (Hsp60) member 1 [Source:HGNC Symbol;Acc:HGNC:5261]
ENSG00000140740	9970.94	10090.6	10250.4	6586.13	6617.75	6791.61	10104	6665.16	0.600382	1.07903e-114	4.45667e-112	UQCRC2	protein_coding	ubiquinol-cytochrome c reductase core protein 2 [Source:HGNC Symbol;Acc:HGNC:12586]
ENSG00000111341	971.113	1067.64	1008.18	2314.21	2344.83	2333.26	1015.64	2330.77	-1.19669	1.72075e-114	6.93378e-112	MGP	protein_coding	matrix Gla protein [Source:HGNC Symbol;Acc:HGNC:7060]
ENSG00000158470	15945.3	15329.3	15750.6	10682.9	10776.6	10942.8	15675.1	10800.8	0.537241	4.36497e-114	1.71699e-111	B4GALT5	protein_coding	beta-1,4-galactosyltransferase 5 [Source:HGNC Symbol;Acc:HGNC:928]
ENSG00000182107	425.32	397.765	400.322	1276.68	1287.52	1237.74	407.802	1267.32	-1.63678	2.42173e-110	9.3045e-108	TMEM30B	protein_coding	transmembrane protein 30B [Source:HGNC Symbol;Acc:HGNC:27254]
ENSG00000143546	5249.46	5044.38	5510.75	8842.55	8555.43	8662.14	5268.2	8686.71	-0.722478	5.01404e-110	1.88266e-107	S100A8	protein_coding	S100 calcium binding protein A8 [Source:HGNC Symbol;Acc:HGNC:10498]
ENSG00000101843	171.804	173.57	143.273	851.716	791.913	769.853	162.883	804.494	-2.3023	1.01828e-104	3.73843e-102	PSMD10	protein_coding	proteasome 26S subunit, non-ATPase 10 [Source:HGNC Symbol;Acc:HGNC:9555]
ENSG00000131747	6946.55	7007.89	7119.42	10175.2	10483.5	10434.8	7024.62	10364.5	-0.560914	1.88592e-103	6.77331e-101	TOP2A	protein_coding	DNA topoisomerase II alpha [Source:HGNC Symbol;Acc:HGNC:11989]
ENSG00000148346	1881.47	1705.87	1987.92	3838.06	3724.01	3780.22	1858.42	3780.76	-1.02661	2.84836e-101	1.00123e-98	LCN2	protein_coding	lipocalin 2 [Source:HGNC Symbol;Acc:HGNC:6526]
ENSG00000032444	3829.98	3805.88	3649.25	2032.38	2112.48	1985.95	3761.71	2043.6	0.880824	1.39805e-100	4.81191e-98	PNPLA6	protein_coding	patatin like phospholipase domain containing 6 [Source:HGNC Symbol;Acc:HGNC:16268]
ENSG00000105655	10590.1	9858.23	10067.1	6625.25	6518.62	6345.37	10171.8	6496.41	0.64625	1.18426e-98	3.99287e-96	ISYNA1	protein_coding	inositol-3-phosphate synthase 1 [Source:HGNC Symbol;Acc:HGNC:29821]
ENSG00000186480	2400.02	2392.92	2411.42	1179.78	1088.21	1181.06	2401.45	1149.68	1.06148	5.1182e-97	1.69115e-94	INSIG1	protein_coding	insulin induced gene 1 [Source:HGNC Symbol;Acc:HGNC:6083]
ENSG00000108946	3070.48	3026.63	3152.01	4976.05	5144.77	5097.32	3083.04	5072.71	-0.718491	3.34739e-95	1.08436e-92	PRKAR1A	protein_coding	protein kinase cAMP-dependent type I regulatory subunit alpha [Source:HGNC Symbol;Acc:HGNC:9388]
ENSG00000071537	1083.21	1136.34	1259.96	2510.69	2497.24	2569.27	1159.84	2525.74	-1.12334	9.73212e-95	3.09201e-92	SEL1L	protein_coding	SEL1L, ERAD E3 ligase adaptor subunit [Source:HGNC Symbol;Acc:HGNC:10717]
ENSG00000000419	891.497	811.801	798.538	2057.28	1964.33	1890.11	833.945	1970.57	-1.24198	7.20518e-94	2.24598e-91	DPM1	protein_coding	dolichyl-phosphate mannosyltransferase subunit 1, catalytic [Source:HGNC Symbol;Acc:HGNC:3005]
ENSG00000112893	1483.38	1490.71	1394.81	2836.98	2773.29	2799.09	1456.3	2803.12	-0.944273	1.90709e-92	5.83464e-90	MAN2A1	protein_coding	mannosidase alpha class 2A member 1 [Source:HGNC Symbol;Acc:HGNC:6824]
ENSG00000171345	22889.8	22345.3	23002.7	31214.8	31007.2	29987.2	22745.9	30736.4	-0.434596	2.26924e-92	6.81638e-90	KRT19	protein_coding	keratin 19 [Source:HGNC Symbol;Acc:HGNC:6436]
ENSG00000147526	1382.82	1517.83	1537.03	2892.99	3133.54	2986.66	1479.23	3004.4	-1.02099	1.60937e-91	4.74792e-89	TACC1	protein_coding	transforming acidic coiled-coil containing protein 1 [Source:HGNC Symbol;Acc:HGNC:11522]
ENSG00000172795	609.696	653.599	638.409	1501.62	1593.42	1599.48	633.901	1564.84	-1.3019	4.76436e-91	1.38091e-88	DCP2	protein_coding	decapping mRNA 2 [Source:HGNC Symbol;Acc:HGNC:24452]
ENSG00000167005	2156.98	2246.47	2241.8	3864.73	3811.41	3779.19	2215.08	3818.44	-0.785485	1.11741e-90	3.18287e-88	NUDT21	protein_coding	nudix hydrolase 21 [Source:HGNC Symbol;Acc:HGNC:13870]
ENSG00000187837	490.271	519.806	530.954	1695.43	1509.22	1386.15	513.677	1530.27	-1.57589	3.43193e-90	9.60998e-88	HIST1H1C	protein_coding	histone cluster 1 H1 family member c [Source:HGNC Symbol;Acc:HGNC:4716]
ENSG00000138095	8622.69	8910.83	8677.51	5845.54	5873.8	6072.26	8737.01	5930.53	0.559504	7.32166e-87	2.01602e-84	LRPPRC	protein_coding	leucine rich pentatricopeptide repeat containing [Source:HGNC Symbol;Acc:HGNC:15714]
ENSG00000123416	5320.7	5438.53	5332.71	8037.07	8772.86	8418.92	5363.98	8409.61	-0.647906	1.09391e-86	2.9627e-84	TUBA1B	protein_coding	tubulin alpha 1b [Source:HGNC Symbol;Acc:HGNC:18809]
ENSG00000104388	798.262	761.177	758.505	1786.11	1724.51	1690.17	772.648	1733.6	-1.16691	4.66038e-86	1.24184e-83	RAB2A	protein_coding	RAB2A, member RAS oncogene family [Source:HGNC Symbol;Acc:HGNC:9763]
ENSG00000101347	3374.28	3386.42	3494.39	1968.37	1935.55	1832.4	3418.36	1912.11	0.837292	1.40777e-85	3.69172e-83	SAMHD1	protein_coding	SAM and HD domain containing deoxynucleoside triphosphate triphosphohydrolase 1 [Source:HGNC Symbol;Acc:HGNC:15925]
ENSG00000110911	3486.37	3567.22	3583.94	2099.95	1984.58	1982.86	3545.84	2022.46	0.80901	1.92724e-85	4.97499e-83	SLC11A2	protein_coding	solute carrier family 11 member 2 [Source:HGNC Symbol;Acc:HGNC:10908]
ENSG00000167792	7409.59	7021.45	7245.83	4822.24	4609.72	4610.88	7225.62	4680.95	0.625292	1.86466e-84	4.7394e-82	NDUFV1	protein_coding	NADH:ubiquinone oxidoreductase core subunit V1 [Source:HGNC Symbol;Acc:HGNC:7716]
ENSG00000187514	18632.4	19018.6	19759.1	25813.7	26617	26281.2	19136.7	26237.3	-0.455214	2.37513e-84	5.94538e-82	PTMA	protein_coding	prothymosin alpha [Source:HGNC Symbol;Acc:HGNC:9623]
ENSG00000135318	673.599	748.52	686.869	1661.65	1669.09	1597.42	702.996	1642.72	-1.22261	3.51903e-84	8.67729e-82	NT5E	protein_coding	5'-nucleotidase ecto [Source:HGNC Symbol;Acc:HGNC:8021]
ENSG00000172667	1686.62	1699.54	1727.71	3038.79	3115.42	2974.29	1704.62	3042.84	-0.835934	8.38529e-83	2.03725e-80	ZMAT3	protein_coding	zinc finger matrin-type 3 [Source:HGNC Symbol;Acc:HGNC:29983]
ENSG00000126067	884.164	802.761	903.886	1884.8	1862.01	1931.33	863.603	1892.71	-1.1341	1.86832e-82	4.47342e-80	PSMB2	protein_coding	proteasome subunit beta 2 [Source:HGNC Symbol;Acc:HGNC:9539]
ENSG00000184254	1543.1	1602.81	1596.02	2833.42	2810.6	2884.63	1580.64	2842.88	-0.846442	5.56279e-81	1.3129e-78	ALDH1A3	protein_coding	aldehyde dehydrogenase 1 family member A3 [Source:HGNC Symbol;Acc:HGNC:409]
ENSG00000105677	2385.36	2414.61	2380.86	1266.9	1275.8	1177.97	2393.61	1240.22	0.948329	2.73236e-80	6.35794e-78	TMEM147	protein_coding	transmembrane protein 147 [Source:HGNC Symbol;Acc:HGNC:30414]
ENSG00000155506	13049.8	12826.1	12816.6	9357.32	9345.21	9610.29	12897.5	9437.6	0.450635	5.03611e-80	1.15558e-77	LARP1	protein_coding	La ribonucleoprotein domain family member 1 [Source:HGNC Symbol;Acc:HGNC:29531]
ENSG00000122042	570.935	583.087	575.2	1384.26	1344.01	1360.38	576.407	1362.89	-1.24148	1.51315e-79	3.42448e-77	UBL3	protein_coding	ubiquitin like 3 [Source:HGNC Symbol;Acc:HGNC:12504]
ENSG00000104549	4114.92	4282.3	4257.11	2642.27	2556.93	2520.83	4218.11	2573.35	0.712517	6.14138e-79	1.3711e-76	SQLE	protein_coding	squalene epoxidase [Source:HGNC Symbol;Acc:HGNC:11279]
ENSG00000145349	812.928	792.817	821.714	1749.66	1693.61	1692.23	809.153	1711.83	-1.08219	1.01308e-77	2.2316e-75	CAMK2D	protein_coding	calcium/calmodulin dependent protein kinase II delta [Source:HGNC Symbol;Acc:HGNC:1462]
ENSG00000204287	1312.63	1372.29	1444.32	2544.48	2571.85	2600.19	1376.41	2572.17	-0.902021	1.5961e-76	3.46963e-74	HLA-DRA	protein_coding	major histocompatibility complex, class II, DR alpha [Source:HGNC Symbol;Acc:HGNC:4947]
ENSG00000184203	488.176	490.878	510.938	1218.9	1242.76	1202.7	496.664	1221.45	-1.29857	2.31376e-76	4.96436e-74	PPP1R2	protein_coding	protein phosphatase 1 regulatory inhibitor subunit 2 [Source:HGNC Symbol;Acc:HGNC:9288]
ENSG00000010278	7509.11	7598.21	7712.53	5302.33	5345.14	5310.65	7606.61	5319.37	0.516065	6.28752e-76	1.33175e-73	CD9	protein_coding	CD9 molecule [Source:HGNC Symbol;Acc:HGNC:1709]
ENSG00000121579	1946.42	1951.76	2224.95	3676.25	3796.49	3771.97	2041.04	3748.24	-0.877565	1.12326e-75	2.34904e-73	NAA50	protein_coding	N(alpha)-acetyltransferase 50, NatE catalytic subunit [Source:HGNC Symbol;Acc:HGNC:29533]
ENSG00000108561	5194.99	5232.41	5364.32	3495.77	3393.61	3446.31	5263.91	3445.23	0.610982	3.94155e-75	8.1398e-73	C1QBP	protein_coding	complement C1q binding protein [Source:HGNC Symbol;Acc:HGNC:1243]
ENSG00000134824	2227.17	2091.88	2160.69	1102.43	1070.09	1138.81	2159.91	1103.78	0.967789	5.82465e-75	1.18801e-72	FADS2	protein_coding	fatty acid desaturase 2 [Source:HGNC Symbol;Acc:HGNC:3575]
ENSG00000127954	7336.25	7368.59	7393.32	10013.4	10355.6	10476	7366.05	10281.7	-0.480723	7.71778e-74	1.55494e-71	STEAP4	protein_coding	STEAP4 metalloreductase [Source:HGNC Symbol;Acc:HGNC:21923]
ENSG00000076248	1446.72	1566.65	1544.4	2812.08	2781.82	2687.79	1519.26	2760.56	-0.861085	9.08967e-74	1.80928e-71	UNG	protein_coding	uracil DNA glycosylase [Source:HGNC Symbol;Acc:HGNC:12572]
ENSG00000111371	7793	7851.33	8065.44	10752.2	10878.9	10887.2	7903.26	10839.5	-0.455782	1.00081e-73	1.96838e-71	SLC38A1	protein_coding	solute carrier family 38 member 1 [Source:HGNC Symbol;Acc:HGNC:13447]
ENSG00000171314	6929.79	6994.33	7070.96	4799.12	4940.13	4845.85	6998.36	4861.7	0.525909	1.00563e-72	1.95459e-70	PGAM1	protein_coding	phosphoglycerate mutase 1 [Source:HGNC Symbol;Acc:HGNC:8888]
ENSG00000107372	3136.48	3206.52	3225.75	4833.8	4823.95	4865.43	3189.59	4841.06	-0.601819	3.06619e-71	5.8903e-69	ZFAND5	protein_coding	zinc finger AN1-type containing 5 [Source:HGNC Symbol;Acc:HGNC:13008]
ENSG00000189060	6224.76	6069.52	6201.84	8699.41	8724.89	8485.91	6165.37	8636.74	-0.486693	4.6126e-71	8.75917e-69	H1F0	protein_coding	H1 histone family member 0 [Source:HGNC Symbol;Acc:HGNC:4714]
ENSG00000118200	1334.63	1481.67	1404.29	2568.48	2578.25	2696.03	1406.86	2614.25	-0.892342	5.27379e-71	9.90094e-69	CAMSAP2	protein_coding	calmodulin regulated spectrin associated protein family member 2 [Source:HGNC Symbol;Acc:HGNC:29188]
ENSG00000112972	4311.87	4419.71	4370.89	6336.3	6499.44	6288.68	4367.49	6374.81	-0.545129	1.04608e-70	1.94183e-68	HMGCS1	protein_coding	3-hydroxy-3-methylglutaryl-CoA synthase 1 [Source:HGNC Symbol;Acc:HGNC:5007]
ENSG00000105281	1227.77	1120.07	1114.58	2256.42	2166.83	2300.29	1154.14	2241.18	-0.958427	1.1202e-70	2.05631e-68	SLC1A5	protein_coding	solute carrier family 1 member 5 [Source:HGNC Symbol;Acc:HGNC:10943]
ENSG00000076604	4199.78	3898.09	3981.1	6189.61	6102.95	6014.54	4026.32	6102.37	-0.600735	6.80274e-70	1.23503e-67	TRAF4	protein_coding	TNF receptor associated factor 4 [Source:HGNC Symbol;Acc:HGNC:12034]
ENSG00000172115	4735.09	4686.39	4962.94	7080.44	6903.39	7157.47	4794.81	7047.1	-0.55616	1.84109e-69	3.30615e-67	CYCS	protein_coding	cytochrome c, somatic [Source:HGNC Symbol;Acc:HGNC:19986]
ENSG00000128524	1478.15	1450.03	1527.55	2664.5	2557.99	2643.47	1485.24	2621.99	-0.821059	2.75612e-69	4.89611e-67	ATP6V1F	protein_coding	ATPase H+ transporting V1 subunit F [Source:HGNC Symbol;Acc:HGNC:16832]
ENSG00000260852	685.122	663.544	708.992	209.817	169.467	190.66	685.886	189.981	1.84672	6.96381e-69	1.22393e-66	FBXL19-AS1	antisense	FBXL19 antisense RNA 1 [Source:HGNC Symbol;Acc:HGNC:27557]
ENSG00000082898	3923.21	3890.86	3909.46	5639.28	5693.67	5770.29	3907.85	5701.08	-0.544774	4.34412e-68	7.55465e-66	XPO1	protein_coding	exportin 1 [Source:HGNC Symbol;Acc:HGNC:12825]
ENSG00000110422	2486.97	2565.58	2651.61	1479.39	1406.9	1426.34	2568.05	1437.54	0.83612	1.03996e-67	1.7897e-65	HIPK3	protein_coding	homeodomain interacting protein kinase 3 [Source:HGNC Symbol;Acc:HGNC:4915]
ENSG00000120805	725.978	787.393	740.596	1549.62	1566.77	1586.08	751.322	1567.49	-1.05924	2.31899e-67	3.9497e-65	ARL1	protein_coding	ADP ribosylation factor like GTPase 1 [Source:HGNC Symbol;Acc:HGNC:692]
ENSG00000137331	2251.27	2312.46	2267.09	1281.13	1274.73	1218.16	2276.94	1258.01	0.855819	3.70177e-67	6.2405e-65	IER3	protein_coding	immediate early response 3 [Source:HGNC Symbol;Acc:HGNC:5392]
ENSG00000144824	1456.15	1598.29	1499.1	2701.84	2651.79	2675.42	1517.85	2676.35	-0.817053	5.79184e-66	9.66535e-64	PHLDB2	protein_coding	pleckstrin homology like domain family B member 2 [Source:HGNC Symbol;Acc:HGNC:29573]
ENSG00000116133	8180.61	8391.02	8482.62	5788.64	6064.58	5919.73	8351.42	5924.32	0.495964	6.90043e-66	1.14002e-63	DHCR24	protein_coding	24-dehydrocholesterol reductase [Source:HGNC Symbol;Acc:HGNC:2859]
ENSG00000103811	5753.35	5791.99	5852.08	4017.64	3854.05	3723.53	5799.14	3865.07	0.584501	9.11305e-66	1.49066e-63	CTSH	protein_coding	cathepsin H [Source:HGNC Symbol;Acc:HGNC:2535]
ENSG00000130513	1755.76	1602.81	1742.46	833.935	837.743	790.465	1700.34	820.714	1.04956	1.73932e-65	2.81719e-63	GDF15	protein_coding	growth differentiation factor 15 [Source:HGNC Symbol;Acc:HGNC:30142]
ENSG00000112715	8491.74	8392.83	8621.68	6030.47	6270.28	6095.96	8502.08	6132.24	0.471625	2.23414e-64	3.58352e-62	VEGFA	protein_coding	vascular endothelial growth factor A [Source:HGNC Symbol;Acc:HGNC:12680]
ENSG00000130164	3185.71	3268	3220.49	1971.04	2013.36	1858.16	3224.73	1947.52	0.727675	6.24741e-64	9.92438e-62	LDLR	protein_coding	low density lipoprotein receptor [Source:HGNC Symbol;Acc:HGNC:6547]
ENSG00000111799	32839.8	33888.6	32765.3	41233.5	41140	41599.9	33164.6	41324.5	-0.317166	1.44703e-63	2.27679e-61	COL12A1	protein_coding	collagen type XII alpha 1 chain [Source:HGNC Symbol;Acc:HGNC:2188]
ENSG00000125166	5818.3	5556.95	5882.63	3916.29	3924.39	3858.54	5752.63	3899.74	0.560228	3.48848e-63	5.43709e-61	GOT2	protein_coding	glutamic-oxaloacetic transaminase 2 [Source:HGNC Symbol;Acc:HGNC:4433]
ENSG00000124107	2862.01	3013.07	3045.61	4511.96	4544.7	4533.58	2973.56	4530.08	-0.606973	5.06466e-63	7.81993e-61	SLPI	protein_coding	secretory leukocyte peptidase inhibitor [Source:HGNC Symbol;Acc:HGNC:11092]
ENSG00000198363	2920.67	2978.71	2963.44	4573.3	4353.92	4584.08	2954.28	4503.77	-0.608538	1.27464e-62	1.94984e-60	ASPH	protein_coding	aspartate beta-hydroxylase [Source:HGNC Symbol;Acc:HGNC:757]
ENSG00000136160	2460.78	2514.05	2395.61	1450.94	1347.21	1336.68	2456.82	1378.28	0.832845	2.06629e-62	3.13186e-60	EDNRB	protein_coding	endothelin receptor type B [Source:HGNC Symbol;Acc:HGNC:3180]
ENSG00000197444	1873.09	1869.49	1773.01	968.182	980.565	968.758	1838.53	972.502	0.91932	4.23717e-62	6.36384e-60	OGDHL	protein_coding	oxoglutarate dehydrogenase like [Source:HGNC Symbol;Acc:HGNC:25590]
ENSG00000138061	1988.32	1949.95	1894.16	1041.08	1057.3	1066.66	1944.14	1055.02	0.88235	8.56859e-62	1.27533e-59	CYP1B1	protein_coding	cytochrome P450 family 1 subfamily B member 1 [Source:HGNC Symbol;Acc:HGNC:2597]
ENSG00000123728	262.944	226.907	249.675	719.246	784.452	740.997	246.509	748.232	-1.60382	8.69735e-62	1.28294e-59	RAP2C	protein_coding	RAP2C, member of RAS oncogene family [Source:HGNC Symbol;Acc:HGNC:21165]
ENSG00000111412	1417.39	1332.51	1445.37	676.572	636.301	652.366	1398.42	655.08	1.09198	1.84798e-61	2.70181e-59	C12orf49	protein_coding	chromosome 12 open reading frame 49 [Source:HGNC Symbol;Acc:HGNC:26128]
ENSG00000073578	12821.4	12844.2	13038.9	9899.64	9981.51	9692.73	12901.5	9857.96	0.388089	2.55923e-61	3.70887e-59	SDHA	protein_coding	succinate dehydrogenase complex flavoprotein subunit A [Source:HGNC Symbol;Acc:HGNC:10680]
ENSG00000257093	1247.68	1270.13	1390.59	2394.23	2303.26	2383.76	1302.8	2360.42	-0.858462	3.14421e-61	4.51701e-59	KIAA1147	protein_coding	KIAA1147 [Source:HGNC Symbol;Acc:HGNC:29472]
ENSG00000160752	1965.27	1930.06	2157.53	1024.19	989.091	1073.88	2017.62	1029.05	0.970521	3.93548e-61	5.605e-59	FDPS	protein_coding	farnesyl diphosphate synthase [Source:HGNC Symbol;Acc:HGNC:3631]
ENSG00000137710	653.694	715.072	688.976	1455.38	1397.3	1431.49	685.914	1428.06	-1.05711	5.38586e-61	7.60511e-59	RDX	protein_coding	radixin [Source:HGNC Symbol;Acc:HGNC:9944]
ENSG00000119689	3288.38	3218.28	3332.16	2059.94	2071.98	2074.59	3279.6	2068.83	0.664448	8.1918e-61	1.14692e-58	DLST	protein_coding	dihydrolipoamide S-succinyltransferase [Source:HGNC Symbol;Acc:HGNC:2911]
ENSG00000039560	812.928	820.841	818.554	1611.86	1561.44	1598.45	817.441	1590.58	-0.960599	1.18554e-60	1.6459e-58	RAI14	protein_coding	retinoic acid induced 14 [Source:HGNC Symbol;Acc:HGNC:14873]
ENSG00000122642	1137.68	1182.45	1132.49	2031.49	2178.56	2090.04	1150.87	2100.03	-0.866148	1.504e-60	2.07063e-58	FKBP9	protein_coding	FK506 binding protein 9 [Source:HGNC Symbol;Acc:HGNC:3725]
ENSG00000179889	4299.3	4304.9	4245.52	5979.79	6175.43	6311.36	4283.24	6155.52	-0.522595	5.66675e-60	7.73722e-58	PDXDC1	protein_coding	pyridoxal dependent decarboxylase domain containing 1 [Source:HGNC Symbol;Acc:HGNC:28995]
ENSG00000112062	1221.49	1140.86	1220.98	2121.29	2117.81	2128.18	1194.44	2122.42	-0.830667	9.07756e-59	1.22927e-56	MAPK14	protein_coding	mitogen-activated protein kinase 14 [Source:HGNC Symbol;Acc:HGNC:6876]
ENSG00000103485	4694.24	4594.18	4701.68	3210.38	3117.56	3185.56	4663.37	3171.17	0.555678	1.24098e-58	1.66685e-56	QPRT	protein_coding	quinolinate phosphoribosyltransferase [Source:HGNC Symbol;Acc:HGNC:9755]
ENSG00000174669	2234.5	2168.72	2098.53	1202	1210.78	1255.26	2167.25	1222.68	0.826257	1.90318e-58	2.53568e-56	SLC29A2	protein_coding	solute carrier family 29 member 2 [Source:HGNC Symbol;Acc:HGNC:11004]
ENSG00000188064	1409	1365.96	1249.43	2345.33	2409.84	2421.9	1341.46	2392.36	-0.833752	2.9182e-58	3.85692e-56	WNT7B	protein_coding	Wnt family member 7B [Source:HGNC Symbol;Acc:HGNC:12787]
ENSG00000111911	275.515	309.172	264.423	841.047	762.069	800.771	283.037	801.296	-1.49919	5.79536e-58	7.59882e-56	HINT3	protein_coding	histidine triad nucleotide binding protein 3 [Source:HGNC Symbol;Acc:HGNC:18468]
ENSG00000135821	2299.45	2372.12	2365.06	3584.67	3598.25	3601.92	2345.55	3594.95	-0.615696	6.10324e-58	7.9395e-56	GLUL	protein_coding	glutamate-ammonia ligase [Source:HGNC Symbol;Acc:HGNC:4341]
ENSG00000105220	13316.9	13746.4	13841.7	10312.2	10566.7	10393.5	13635	10424.1	0.387697	1.01188e-57	1.30604e-55	GPI	protein_coding	glucose-6-phosphate isomerase [Source:HGNC Symbol;Acc:HGNC:4458]
ENSG00000138069	1841.66	1789.94	1845.7	3028.13	2877.74	2958.83	1825.77	2954.9	-0.695714	1.2128e-57	1.55323e-55	RAB1A	protein_coding	RAB1A, member RAS oncogene family [Source:HGNC Symbol;Acc:HGNC:9758]
ENSG00000188293	966.923	975.427	1082.98	1971.93	1871.6	1891.14	1008.44	1911.56	-0.924161	2.73031e-57	3.4698e-55	IGFL1	protein_coding	IGF like family member 1 [Source:HGNC Symbol;Acc:HGNC:24093]
ENSG00000100697	1868.9	1869.49	1874.14	2916.99	3029.09	2998	1870.84	2981.36	-0.671806	7.03435e-57	8.87134e-55	DICER1	protein_coding	dicer 1, ribonuclease III [Source:HGNC Symbol;Acc:HGNC:17098]
ENSG00000179776	2766.68	2750	2728.51	1690.1	1707.46	1718	2748.4	1705.19	0.688936	7.66179e-57	9.58942e-55	CDH5	protein_coding	cadherin 5 [Source:HGNC Symbol;Acc:HGNC:1764]
ENSG00000178982	3670.75	3607.9	3657.68	2419.12	2352.29	2237.42	3645.44	2336.28	0.6409	1.89857e-56	2.35836e-54	EIF3K	protein_coding	eukaryotic translation initiation factor 3 subunit K [Source:HGNC Symbol;Acc:HGNC:24656]
ENSG00000168175	1171.2	1143.57	1190.43	2038.61	2015.49	2071.49	1168.4	2041.86	-0.806018	5.59029e-56	6.89233e-54	MAPK1IP1L	protein_coding	mitogen-activated protein kinase 1 interacting protein 1 like [Source:HGNC Symbol;Acc:HGNC:19840]
ENSG00000128590	410.654	398.669	404.536	985.963	914.483	979.064	404.62	959.837	-1.24744	1.02186e-55	1.25053e-53	DNAJB9	protein_coding	DnaJ heat shock protein family (Hsp40) member B9 [Source:HGNC Symbol;Acc:HGNC:6968]
ENSG00000132356	2716.39	2783.45	2791.72	4145.67	4065.08	4086.3	2763.85	4099.02	-0.568682	1.04343e-55	1.26753e-53	PRKAA1	protein_coding	protein kinase AMP-activated catalytic subunit alpha 1 [Source:HGNC Symbol;Acc:HGNC:9376]
ENSG00000153179	251.421	287.475	298.135	755.698	817.492	761.609	279.01	778.266	-1.47831	1.17357e-55	1.41523e-53	RASSF3	protein_coding	Ras association domain family member 3 [Source:HGNC Symbol;Acc:HGNC:14271]
ENSG00000134308	4224.92	4256.08	4761.73	6653.7	6836.24	6735.96	4414.24	6741.97	-0.611386	2.27761e-55	2.72669e-53	YWHAQ	protein_coding	tyrosine 3-monooxygenase/tryptophan 5-monooxygenase activation protein theta [Source:HGNC Symbol;Acc:HGNC:12854]
ENSG00000076554	7688.24	7671.43	7914.79	5713.96	5712.85	5757.93	7758.16	5728.25	0.437458	2.44853e-55	2.91023e-53	TPD52	protein_coding	tumor protein D52 [Source:HGNC Symbol;Acc:HGNC:12005]
ENSG00000154518	4859.76	4871.71	4735.39	3349.07	3110.1	3048.5	4822.29	3169.22	0.604561	4.66733e-55	5.50778e-53	ATP5MC3	protein_coding	ATP synthase membrane subunit c locus 3 [Source:HGNC Symbol;Acc:HGNC:843]
ENSG00000108588	5785.82	5921.27	6026.96	4054.1	4041.63	4267.69	5911.35	4121.14	0.520693	9.27023e-55	1.0862e-52	CCDC47	protein_coding	coiled-coil domain containing 47 [Source:HGNC Symbol;Acc:HGNC:24856]
ENSG00000069275	5454.79	5591.3	5555	7420.06	7686.77	7869.61	5533.7	7658.82	-0.468234	5.67974e-54	6.60809e-52	NUCKS1	protein_coding	nuclear casein kinase and cyclin dependent kinase substrate 1 [Source:HGNC Symbol;Acc:HGNC:29923]
ENSG00000138821	6686.75	6756.57	6762.29	8864.78	8967.9	8815.7	6735.2	8882.79	-0.399156	6.97064e-54	8.05328e-52	SLC39A8	protein_coding	solute carrier family 39 member 8 [Source:HGNC Symbol;Acc:HGNC:20862]
ENSG00000172893	4176.73	4212.69	4089.61	2804.97	2878.81	2776.42	4159.68	2820.07	0.561243	1.18944e-53	1.36464e-51	DHCR7	protein_coding	7-dehydrocholesterol reductase [Source:HGNC Symbol;Acc:HGNC:2860]
ENSG00000112144	1377.58	1419.3	1361.1	2274.21	2334.17	2404.37	1385.99	2337.58	-0.752923	1.2297e-53	1.4011e-51	ICK	protein_coding	intestinal cell kinase [Source:HGNC Symbol;Acc:HGNC:21219]
ENSG00000120137	3510.47	3884.53	3748.28	2303.54	2316.05	2387.89	3714.43	2335.83	0.670114	1.33091e-53	1.50603e-51	PANK3	protein_coding	pantothenate kinase 3 [Source:HGNC Symbol;Acc:HGNC:19365]
ENSG00000052802	2056.41	2123.52	2203.88	1235.79	1138.31	1229.5	2127.94	1201.2	0.823862	2.38631e-53	2.68192e-51	MSMO1	protein_coding	methylsterol monooxygenase 1 [Source:HGNC Symbol;Acc:HGNC:10545]
ENSG00000163785	772.072	796.433	797.484	1495.39	1468.72	1559.29	788.663	1507.8	-0.934638	2.60364e-53	2.90641e-51	RYK	protein_coding	receptor-like tyrosine kinase [Source:HGNC Symbol;Acc:HGNC:10481]
ENSG00000096433	6966.46	6630.92	6560.02	4832.91	4783.45	4804.63	6719.13	4807	0.482829	8.37224e-53	9.28308e-51	ITPR3	protein_coding	inositol 1,4,5-trisphosphate receptor type 3 [Source:HGNC Symbol;Acc:HGNC:6182]
ENSG00000152234	3815.31	4042.73	3954.76	2542.7	2674.17	2584.73	3937.6	2600.53	0.599618	1.26069e-52	1.38852e-50	ATP5F1A	protein_coding	ATP synthase F1 subunit alpha [Source:HGNC Symbol;Acc:HGNC:823]
ENSG00000103489	2337.17	2216.63	2233.38	1353.14	1322.7	1357.29	2262.39	1344.38	0.750247	1.62808e-52	1.7813e-50	XYLT1	protein_coding	xylosyltransferase 1 [Source:HGNC Symbol;Acc:HGNC:15516]
ENSG00000179091	6945.5	6942.8	7120.47	5122.74	4856.99	4668.59	7002.92	4882.77	0.519319	1.92858e-52	2.09618e-50	CYC1	protein_coding	cytochrome c1 [Source:HGNC Symbol;Acc:HGNC:2579]
ENSG00000071073	3453.9	3641.35	3529.16	2320.44	2369.34	2289.98	3541.47	2326.59	0.606821	5.76171e-52	6.22151e-50	MGAT4A	protein_coding	alpha-1,3-mannosyl-glycoprotein 4-beta-N-acetylglucosaminyltransferase A [Source:HGNC Symbol;Acc:HGNC:7047]
ENSG00000099875	3200.38	2862.1	2920.25	4541.3	4592.67	4689.2	2994.24	4607.72	-0.622479	7.05888e-52	7.57271e-50	MKNK2	protein_coding	MAP kinase interacting serine/threonine kinase 2 [Source:HGNC Symbol;Acc:HGNC:7111]
ENSG00000183723	3173.14	3197.48	3175.19	2089.28	2046.4	2112.72	3181.94	2082.8	0.611291	8.55213e-52	9.11547e-50	CMTM4	protein_coding	CKLF like MARVEL transmembrane domain containing 4 [Source:HGNC Symbol;Acc:HGNC:19175]
ENSG00000099282	1961.08	1817.96	1897.32	3011.23	3001.38	2955.74	1892.12	2989.45	-0.660985	8.74068e-52	9.25671e-50	TSPAN15	protein_coding	tetraspanin 15 [Source:HGNC Symbol;Acc:HGNC:23298]
ENSG00000130204	4104.45	3906.23	3972.67	2714.29	2674.17	2553.81	3994.45	2647.42	0.592526	1.02703e-51	1.08074e-49	TOMM40	protein_coding	translocase of outer mitochondrial membrane 40 [Source:HGNC Symbol;Acc:HGNC:18001]
ENSG00000164684	5113.27	5123.93	4927.12	6877.74	6982.26	7273.93	5054.78	7044.64	-0.478305	1.73642e-51	1.81566e-49	ZNF704	protein_coding	zinc finger protein 704 [Source:HGNC Symbol;Acc:HGNC:32291]
ENSG00000150768	3510.47	3678.42	3567.08	2353.33	2409.84	2383.76	3585.32	2382.31	0.590601	2.89186e-51	3.0048e-49	DLAT	protein_coding	dihydrolipoamide S-acetyltransferase [Source:HGNC Symbol;Acc:HGNC:2896]
ENSG00000078808	5658.02	5578.65	5620.31	4067.43	4118.37	3981.18	5618.99	4055.66	0.470259	1.59882e-50	1.65088e-48	SDF4	protein_coding	stromal cell derived factor 4 [Source:HGNC Symbol;Acc:HGNC:24188]
ENSG00000253276	2670.3	2435.4	2475.68	4055.87	3892.42	3821.44	2527.13	3923.24	-0.635774	1.67199e-50	1.71571e-48	CCDC71L	protein_coding	coiled-coil domain containing 71 like [Source:HGNC Symbol;Acc:HGNC:26685]
ENSG00000158615	5343.74	5231.51	5302.16	3516.22	3765.58	3757.54	5292.47	3679.78	0.525154	2.27842e-50	2.32357e-48	PPP1R15B	protein_coding	protein phosphatase 1 regulatory subunit 15B [Source:HGNC Symbol;Acc:HGNC:14951]
ENSG00000104331	848.546	823.553	843.837	1587.85	1529.47	1517.03	838.645	1544.79	-0.882424	3.03951e-50	3.08072e-48	IMPAD1	protein_coding	inositol monophosphatase domain containing 1 [Source:HGNC Symbol;Acc:HGNC:26019]
ENSG00000100234	9021.82	8814.1	9176.86	6843.06	6803.2	6845.2	9004.26	6830.49	0.398226	4.80862e-50	4.8441e-48	TIMP3	protein_coding	TIMP metallopeptidase inhibitor 3 [Source:HGNC Symbol;Acc:HGNC:11822]
ENSG00000176619	5317.55	5099.52	4988.23	3569.56	3630.22	3476.19	5135.1	3558.66	0.529003	5.56428e-50	5.57136e-48	LMNB2	protein_coding	lamin B2 [Source:HGNC Symbol;Acc:HGNC:6638]
ENSG00000050130	1076.92	1119.16	1150.4	1981.71	1874.8	1975.65	1115.49	1944.05	-0.801844	7.996e-50	7.95794e-48	JKAMP	protein_coding	JNK1/MAPK8 associated membrane protein [Source:HGNC Symbol;Acc:HGNC:20184]
ENSG00000164761	5298.7	5533.45	5797.3	7847.7	7631.35	7760.37	5543.15	7746.47	-0.483091	1.25613e-49	1.24267e-47	TNFRSF11B	protein_coding	TNF receptor superfamily member 11b [Source:HGNC Symbol;Acc:HGNC:11909]
ENSG00000168795	771.024	846.154	843.837	1543.4	1517.74	1660.29	820.338	1573.81	-0.938974	1.59301e-49	1.56656e-47	ZBTB5	protein_coding	zinc finger and BTB domain containing 5 [Source:HGNC Symbol;Acc:HGNC:23836]
ENSG00000160932	25969.7	24600.8	25200.3	20299.8	19889.5	19756.5	25256.9	19981.9	0.337639	2.17297e-49	2.12424e-47	LY6E	protein_coding	lymphocyte antigen 6 family member E [Source:HGNC Symbol;Acc:HGNC:6727]
ENSG00000136048	1982.04	1888.48	1926.81	1051.75	1112.73	1149.11	1932.44	1104.53	0.80791	2.55806e-49	2.48598e-47	DRAM1	protein_coding	DNA damage regulated autophagy modulator 1 [Source:HGNC Symbol;Acc:HGNC:25645]
ENSG00000173391	8370.22	8655.9	8742.83	6209.17	6507.97	6428.84	8589.65	6381.99	0.429233	5.73093e-49	5.53688e-47	OLR1	protein_coding	oxidized low density lipoprotein receptor 1 [Source:HGNC Symbol;Acc:HGNC:8133]
ENSG00000151893	691.408	749.425	758.505	1377.15	1438.87	1404.7	733.113	1406.91	-0.939305	6.84187e-49	6.57178e-47	CACUL1	protein_coding	CDK2 associated cullin domain 1 [Source:HGNC Symbol;Acc:HGNC:23727]
ENSG00000126261	1566.14	1570.27	1630.79	2592.49	2469.53	2585.76	1589.07	2549.26	-0.682698	1.0182e-48	9.72347e-47	UBA2	protein_coding	ubiquitin like modifier activating enzyme 2 [Source:HGNC Symbol;Acc:HGNC:30661]
ENSG00000185722	3302	3292.41	3374.3	2176.41	2259.56	2220.93	3322.9	2218.97	0.582966	3.05075e-48	2.89663e-46	ANKFY1	protein_coding	ankyrin repeat and FYVE domain containing 1 [Source:HGNC Symbol;Acc:HGNC:20763]
ENSG00000019582	15844.8	15503.8	16068.7	20098.9	19475.9	19714.2	15805.8	19763	-0.3228	5.70679e-48	5.38754e-46	CD74	protein_coding	CD74 molecule [Source:HGNC Symbol;Acc:HGNC:1697]
ENSG00000177733	2838.96	2759.04	2752.74	4118.11	4058.69	3948.2	2783.58	4041.67	-0.538537	1.18012e-47	1.10777e-45	HNRNPA0	protein_coding	heterogeneous nuclear ribonucleoprotein A0 [Source:HGNC Symbol;Acc:HGNC:5030]
ENSG00000131941	2870.39	2924.47	2956.06	1925.7	1905.71	1804.57	2916.98	1878.66	0.634264	1.43532e-47	1.33971e-45	RHPN2	protein_coding	rhophilin Rho GTPase binding protein 2 [Source:HGNC Symbol;Acc:HGNC:19974]
ENSG00000164292	5736.59	5927.6	5624.53	7762.35	7680.38	8042.75	5762.9	7828.49	-0.441368	1.46526e-47	1.35997e-45	RHOBTB3	protein_coding	Rho related BTB domain containing 3 [Source:HGNC Symbol;Acc:HGNC:18757]
ENSG00000062485	6180.77	6277.45	6087.01	4532.41	4617.18	4525.34	6181.74	4558.31	0.439992	1.48082e-47	1.36674e-45	CS	protein_coding	citrate synthase [Source:HGNC Symbol;Acc:HGNC:2422]
ENSG00000130175	7692.43	7666.01	7539.75	5815.32	5735.24	5829.04	7632.73	5793.2	0.397793	1.91819e-47	1.76058e-45	PRKCSH	protein_coding	protein kinase C substrate 80K-H [Source:HGNC Symbol;Acc:HGNC:9411]
ENSG00000109814	196.946	197.074	232.819	596.557	588.339	632.785	208.947	605.893	-1.53792	1.98286e-47	1.80988e-45	UGDH	protein_coding	UDP-glucose 6-dehydrogenase [Source:HGNC Symbol;Acc:HGNC:12525]
ENSG00000198961	1307.39	1363.25	1276.82	2200.41	2135.93	2171.46	1315.82	2169.27	-0.720578	4.62265e-47	4.1962e-45	PJA2	protein_coding	praja ring finger ubiquitin ligase 2 [Source:HGNC Symbol;Acc:HGNC:17481]
ENSG00000113161	3299.9	3236.36	3286.86	2169.3	2115.67	2246.69	3274.37	2177.22	0.588433	5.71297e-47	5.15137e-45	HMGCR	protein_coding	3-hydroxy-3-methylglutaryl-CoA reductase [Source:HGNC Symbol;Acc:HGNC:5006]
ENSG00000141298	815.023	867.85	783.789	1573.63	1516.68	1490.24	822.221	1526.85	-0.891941	5.73725e-47	5.15137e-45	SSH2	protein_coding	slingshot protein phosphatase 2 [Source:HGNC Symbol;Acc:HGNC:30580]
ENSG00000203880	1726.42	1759.2	1740.35	2779.19	2697.62	2650.69	1741.99	2709.16	-0.637371	6.478e-47	5.78503e-45	PCMTD2	protein_coding	protein-L-isoaspartate (D-aspartate) O-methyltransferase domain containing 2 [Source:HGNC Symbol;Acc:HGNC:15882]
ENSG00000174574	1278.06	1197.81	1199.91	635.675	585.141	624.54	1225.26	615.119	0.99242	7.02902e-47	6.24335e-45	AKIRIN1	protein_coding	akirin 1 [Source:HGNC Symbol;Acc:HGNC:25744]
ENSG00000125730	3608.94	3559.09	3645.04	2452.02	2470.6	2295.13	3604.36	2405.92	0.582633	7.95907e-47	7.03165e-45	C3	protein_coding	complement C3 [Source:HGNC Symbol;Acc:HGNC:1318]
ENSG00000197045	1541	1651.63	1541.24	2580.93	2546.27	2478.58	1577.96	2535.26	-0.683176	1.12368e-46	9.87463e-45	GMFB	protein_coding	glia maturation factor beta [Source:HGNC Symbol;Acc:HGNC:4373]
ENSG00000170421	118861	118486	119830	140143	139193	137109	119059	138815	-0.221528	1.292e-46	1.12937e-44	KRT8	protein_coding	keratin 8 [Source:HGNC Symbol;Acc:HGNC:6446]
ENSG00000113013	18536	18440.9	18643.4	15300.7	15107.1	14991	18540.1	15132.9	0.292718	1.43292e-46	1.24596e-44	HSPA9	protein_coding	heat shock protein family A (Hsp70) member 9 [Source:HGNC Symbol;Acc:HGNC:5244]
ENSG00000168214	1003.59	1082.1	1098.78	1840.35	1805.52	1877.74	1061.49	1841.2	-0.794142	2.86731e-46	2.48015e-44	RBPJ	protein_coding	recombination signal binding protein for immunoglobulin kappa J region [Source:HGNC Symbol;Acc:HGNC:5724]
ENSG00000025708	5551.17	5360.78	5343.25	3862.06	3897.74	3985.31	5418.4	3915.04	0.468939	3.4392e-46	2.95932e-44	TYMP	protein_coding	thymidine phosphorylase [Source:HGNC Symbol;Acc:HGNC:3148]
ENSG00000164983	2317.26	2406.48	2373.49	1376.26	1372.79	1525.28	2365.74	1424.78	0.732452	6.6995e-46	5.73484e-44	TMEM65	protein_coding	transmembrane protein 65 [Source:HGNC Symbol;Acc:HGNC:25203]
ENSG00000109320	654.742	649.983	613.125	1304.25	1239.56	1205.79	639.284	1249.87	-0.967558	7.22582e-46	6.1535e-44	NFKB1	protein_coding	nuclear factor kappa B subunit 1 [Source:HGNC Symbol;Acc:HGNC:7794]
ENSG00000129055	265.04	250.411	246.514	649.011	640.565	693.59	253.988	661.055	-1.38026	7.35022e-46	6.22733e-44	ANAPC13	protein_coding	anaphase promoting complex subunit 13 [Source:HGNC Symbol;Acc:HGNC:24540]
ENSG00000145495	7597.1	7832.34	7722.01	9873.86	10133.9	9868.96	7717.15	9958.91	-0.36746	1.05277e-45	8.8739e-44	2021-03-06	protein_coding	membrane associated ring-CH-type finger 6 [Source:HGNC Symbol;Acc:HGNC:30550]
ENSG00000196924	25833.5	24257.3	24553.5	19825.1	19602.8	19644.1	24881.4	19690.7	0.33732	1.09021e-45	9.14283e-44	FLNA	protein_coding	filamin A [Source:HGNC Symbol;Acc:HGNC:3754]
ENSG00000113368	1987.27	1921.93	1939.46	2897.43	2997.12	2965.02	1949.55	2953.19	-0.599059	1.25471e-45	1.04693e-43	LMNB1	protein_coding	lamin B1 [Source:HGNC Symbol;Acc:HGNC:6637]
ENSG00000162817	624.362	667.16	685.815	1250.01	1257.68	1307.82	659.112	1271.84	-0.947725	1.34957e-45	1.12041e-43	C1orf115	protein_coding	chromosome 1 open reading frame 115 [Source:HGNC Symbol;Acc:HGNC:25873]
ENSG00000072042	2798.11	2887.41	3130.94	1824.34	1869.47	1750.98	2938.82	1814.93	0.695071	2.58584e-45	2.13603e-43	RDH11	protein_coding	retinol dehydrogenase 11 [Source:HGNC Symbol;Acc:HGNC:17964]
ENSG00000131143	8107.28	7803.42	8062.28	6112.26	5835.43	5709.49	7990.99	5885.73	0.44019	3.08926e-45	2.53919e-43	COX4I1	protein_coding	cytochrome c oxidase subunit 4I1 [Source:HGNC Symbol;Acc:HGNC:2265]
ENSG00000170855	117.33	119.329	119.043	419.634	424.201	406.054	118.567	416.63	-1.81286	3.62021e-45	2.95494e-43	TRIAP1	protein_coding	TP53 regulated inhibitor of apoptosis 1 [Source:HGNC Symbol;Acc:HGNC:26937]
ENSG00000160588	212.66	201.594	228.605	578.776	604.326	586.408	214.287	589.837	-1.46253	3.63085e-45	2.95494e-43	MPZL3	protein_coding	myelin protein zero like 3 [Source:HGNC Symbol;Acc:HGNC:27279]
ENSG00000141738	3344.95	3186.64	3202.58	4590.2	4561.76	4546.98	3244.72	4566.31	-0.49344	3.91656e-45	3.17183e-43	GRB7	protein_coding	growth factor receptor bound protein 7 [Source:HGNC Symbol;Acc:HGNC:4567]
ENSG00000014641	4373.68	4392.59	4400.38	3117.92	3183.64	3103.12	4388.88	3134.89	0.485676	4.2935e-45	3.46014e-43	MDH1	protein_coding	malate dehydrogenase 1 [Source:HGNC Symbol;Acc:HGNC:6970]
ENSG00000156671	1026.64	1094.76	1025.04	1816.34	1757.56	1822.09	1048.81	1798.66	-0.777218	6.74655e-45	5.41066e-43	SAMD8	protein_coding	sterile alpha motif domain containing 8 [Source:HGNC Symbol;Acc:HGNC:26320]
ENSG00000196937	3525.13	3566.32	3487.02	2273.32	2466.33	2365.21	3526.16	2368.29	0.575607	6.9194e-45	5.52249e-43	FAM3C	protein_coding	family with sequence similarity 3 member C [Source:HGNC Symbol;Acc:HGNC:18664]
ENSG00000168765	1352.44	1381.33	1436.95	731.693	783.386	724.507	1390.24	746.529	0.897818	7.07605e-45	5.62035e-43	GSTM4	protein_coding	glutathione S-transferase mu 4 [Source:HGNC Symbol;Acc:HGNC:4636]
ENSG00000166848	678.837	658.119	613.125	1215.34	1328.03	1276.91	650.027	1273.42	-0.968727	8.26537e-45	6.5336e-43	TERF2IP	protein_coding	TERF2 interacting protein [Source:HGNC Symbol;Acc:HGNC:19246]
ENSG00000145391	3211.9	3325.85	3205.74	2235.98	2100.75	2135.39	3247.83	2157.37	0.589623	8.41382e-45	6.61928e-43	SETD7	protein_coding	SET domain containing lysine methyltransferase 7 [Source:HGNC Symbol;Acc:HGNC:30412]
ENSG00000184678	171.804	186.226	203.322	557.438	549.969	529.725	187.117	545.711	-1.54484	8.71029e-45	6.82003e-43	HIST2H2BE	protein_coding	histone cluster 2 H2B family member e [Source:HGNC Symbol;Acc:HGNC:4760]
ENSG00000135486	18053.1	18271.9	18645.5	22801.6	22305.7	22282.5	18323.5	22463.3	-0.29408	9.42275e-45	7.34308e-43	HNRNPA1	protein_coding	heterogeneous nuclear ribonucleoprotein A1 [Source:HGNC Symbol;Acc:HGNC:5031]
ENSG00000079332	2777.15	2838.59	2989.78	4086.1	4197.24	4307.88	2868.51	4197.08	-0.548923	1.16178e-44	9.01118e-43	SAR1A	protein_coding	secretion associated Ras related GTPase 1A [Source:HGNC Symbol;Acc:HGNC:10534]
ENSG00000108179	5252.6	5226.99	5384.33	3768.71	3938.25	3778.16	5287.97	3828.37	0.466258	2.44216e-44	1.88537e-42	PPIF	protein_coding	peptidylprolyl isomerase F [Source:HGNC Symbol;Acc:HGNC:9259]
ENSG00000197903	1741.09	1778.19	1802.5	2668.95	2726.4	2843.41	1773.93	2746.25	-0.629982	2.49528e-44	1.91742e-42	HIST1H2BK	protein_coding	histone cluster 1 H2B family member k [Source:HGNC Symbol;Acc:HGNC:13954]
ENSG00000159450	277.611	317.308	302.349	729.026	755.674	706.987	299.089	730.563	-1.28624	2.83185e-44	2.16597e-42	TCHH	protein_coding	trichohyalin [Source:HGNC Symbol;Acc:HGNC:11791]
ENSG00000054654	3806.93	3829.39	3796.74	5168.08	5142.64	5282.82	3811.02	5197.85	-0.44756	5.09365e-44	3.87798e-42	SYNE2	protein_coding	spectrin repeat containing nuclear envelope protein 2 [Source:HGNC Symbol;Acc:HGNC:17084]
ENSG00000157765	1488.62	1513.31	1525.44	2310.66	2409.84	2468.27	1509.12	2396.26	-0.666308	5.6151e-44	4.25537e-42	SLC34A2	protein_coding	solute carrier family 34 member 2 [Source:HGNC Symbol;Acc:HGNC:11020]
ENSG00000108219	4316.06	3986.69	4080.13	2715.18	2814.86	2866.08	4127.62	2798.71	0.560671	6.62936e-44	5.00108e-42	TSPAN14	protein_coding	tetraspanin 14 [Source:HGNC Symbol;Acc:HGNC:23303]
ENSG00000182446	3536.65	3544.62	3468.06	5072.07	4884.7	4791.23	3516.44	4916	-0.483741	1.02631e-43	7.70712e-42	NPLOC4	protein_coding	NPL4 homolog, ubiquitin recognition factor [Source:HGNC Symbol;Acc:HGNC:18261]
ENSG00000081479	16251.2	16613	16417.4	19930.9	20329.7	19871.9	16427.2	20044.1	-0.286837	1.14506e-43	8.55999e-42	LRP2	protein_coding	LDL receptor related protein 2 [Source:HGNC Symbol;Acc:HGNC:6694]
ENSG00000131979	1376.53	1406.64	1356.88	781.48	697.054	746.15	1380.02	741.561	0.894497	1.26694e-43	9.42844e-42	GCH1	protein_coding	GTP cyclohydrolase 1 [Source:HGNC Symbol;Acc:HGNC:4193]
ENSG00000110395	1267.58	1084.81	1154.61	2011.93	2033.61	2019.96	1169	2021.83	-0.791978	1.82555e-43	1.35246e-41	CBL	protein_coding	Cbl proto-oncogene [Source:HGNC Symbol;Acc:HGNC:1541]
ENSG00000156642	1919.18	1850.51	1876.25	1162.89	1137.24	1099.64	1881.98	1133.26	0.730734	4.15047e-43	3.06116e-41	NPTN	protein_coding	neuroplastin [Source:HGNC Symbol;Acc:HGNC:17867]
ENSG00000115109	871.593	921.186	986.057	1661.65	1644.58	1607.73	926.279	1637.98	-0.822861	5.47558e-43	4.02053e-41	EPB41L5	protein_coding	erythrocyte membrane protein band 4.1 like 5 [Source:HGNC Symbol;Acc:HGNC:19819]
ENSG00000163956	4178.83	3986.69	4160.19	2889.43	2925.71	2827.95	4108.57	2881.03	0.511527	6.45189e-43	4.71645e-41	LRPAP1	protein_coding	LDL receptor related protein associated protein 1 [Source:HGNC Symbol;Acc:HGNC:6701]
ENSG00000168140	1922.32	1746.55	1794.08	2986.34	2773.29	2852.68	1820.98	2870.77	-0.658346	1.03252e-42	7.51463e-41	VASN	protein_coding	vasorin [Source:HGNC Symbol;Acc:HGNC:18517]
ENSG00000138399	1167.01	1154.42	1171.47	607.225	625.643	616.295	1164.3	616.388	0.917947	1.56348e-42	1.13291e-40	FASTKD1	protein_coding	FAST kinase domains 1 [Source:HGNC Symbol;Acc:HGNC:26150]
ENSG00000035862	7486.06	7444.52	7202.64	5591.27	5560.44	5684.75	7377.74	5612.16	0.394817	1.95772e-42	1.41238e-40	TIMP2	protein_coding	TIMP metallopeptidase inhibitor 2 [Source:HGNC Symbol;Acc:HGNC:11821]
ENSG00000159176	6334.76	6188.85	6230.28	4744.89	4740.82	4619.12	6251.3	4701.61	0.410668	2.64599e-42	1.90063e-40	CSRP1	protein_coding	cysteine and glycine rich protein 1 [Source:HGNC Symbol;Acc:HGNC:2469]
ENSG00000170365	425.32	452.005	424.552	900.614	907.022	1015.13	433.959	940.924	-1.11466	4.01054e-42	2.86832e-40	SMAD1	protein_coding	SMAD family member 1 [Source:HGNC Symbol;Acc:HGNC:6767]
ENSG00000165806	221.041	207.922	223.338	557.438	572.351	615.264	217.434	581.685	-1.42053	4.27895e-42	3.04709e-40	CASP7	protein_coding	caspase 7 [Source:HGNC Symbol;Acc:HGNC:1508]
ENSG00000180573	384.465	421.269	396.108	880.166	833.48	890.433	400.614	868.026	-1.11432	5.53436e-42	3.92417e-40	HIST1H2AC	protein_coding	histone cluster 1 H2A family member c [Source:HGNC Symbol;Acc:HGNC:4733]
ENSG00000147684	6247.81	6553.17	6414.64	4839.13	4813.29	4714.97	6405.21	4789.13	0.419671	8.93844e-42	6.31077e-40	NDUFB9	protein_coding	NADH:ubiquinone oxidoreductase subunit B9 [Source:HGNC Symbol;Acc:HGNC:7704]
ENSG00000120742	2216.69	2106.34	2197.56	3317.96	3239.06	3129.91	2173.53	3228.98	-0.57225	1.18552e-41	8.33445e-40	SERP1	protein_coding	stress associated endoplasmic reticulum protein 1 [Source:HGNC Symbol;Acc:HGNC:10759]
ENSG00000253719	1316.82	1450.03	1438	2211.97	2276.62	2347.69	1401.62	2278.76	-0.699858	1.70237e-41	1.19173e-39	ATXN7L3B	protein_coding	ataxin 7 like 3B [Source:HGNC Symbol;Acc:HGNC:37931]
ENSG00000058804	2877.72	2976.91	3025.59	1979.93	2018.68	1975.65	2960.07	1991.42	0.572158	1.78207e-41	1.24226e-39	NDC1	protein_coding	NDC1 transmembrane nucleoporin [Source:HGNC Symbol;Acc:HGNC:25525]
ENSG00000099624	1836.42	1600.1	1729.81	921.951	977.367	982.156	1722.11	960.491	0.842276	2.51858e-41	1.7483e-39	ATP5F1D	protein_coding	ATP synthase F1 subunit delta [Source:HGNC Symbol;Acc:HGNC:837]
ENSG00000197043	2590.68	2528.52	2631.59	1598.52	1678.68	1731.4	2583.6	1669.53	0.630616	3.50405e-41	2.42219e-39	ANXA6	protein_coding	annexin A6 [Source:HGNC Symbol;Acc:HGNC:544]
ENSG00000010256	4291.97	4190.99	4447.79	3028.13	3032.29	3112.39	4310.25	3057.6	0.495039	4.9411e-41	3.40133e-39	UQCRC1	protein_coding	ubiquinol-cytochrome c reductase core protein 1 [Source:HGNC Symbol;Acc:HGNC:12585]
ENSG00000115762	4762.33	4980.19	4955.57	3494.88	3544.95	3630.78	4899.36	3556.87	0.462622	1.20893e-40	8.28745e-39	PLEKHB2	protein_coding	pleckstrin homology domain containing B2 [Source:HGNC Symbol;Acc:HGNC:19236]
ENSG00000155463	4901.66	4839.17	4978.75	3641.57	3518.31	3632.84	4906.52	3597.58	0.447018	2.27498e-40	1.5531e-38	OXA1L	protein_coding	OXA1L, mitochondrial inner membrane protein [Source:HGNC Symbol;Acc:HGNC:8526]
ENSG00000125648	4416.63	3977.65	4246.58	2805.86	2927.84	2866.08	4213.62	2866.59	0.555431	2.48769e-40	1.69132e-38	SLC25A23	protein_coding	solute carrier family 25 member 23 [Source:HGNC Symbol;Acc:HGNC:19375]
ENSG00000155876	980.542	923.898	1017.66	1728.33	1668.03	1622.15	974.034	1672.84	-0.782284	2.7058e-40	1.83207e-38	RRAGA	protein_coding	Ras related GTP binding A [Source:HGNC Symbol;Acc:HGNC:16963]
ENSG00000107331	4718.33	4649.32	4302.41	3027.24	3177.24	3197.93	4556.69	3134.14	0.540884	2.78377e-40	1.87717e-38	ABCA2	protein_coding	ATP binding cassette subfamily A member 2 [Source:HGNC Symbol;Acc:HGNC:32]
ENSG00000184897	1356.63	1257.48	1320.01	2338.22	2092.23	2126.11	1311.37	2185.52	-0.739041	3.60034e-40	2.41793e-38	H1FX	protein_coding	H1 histone family member X [Source:HGNC Symbol;Acc:HGNC:4722]
ENSG00000006327	4426.06	4445.92	4394.06	3273.5	3213.48	3118.58	4422.01	3201.85	0.4654	4.95495e-40	3.3142e-38	TNFRSF12A	protein_coding	TNF receptor superfamily member 12A [Source:HGNC Symbol;Acc:HGNC:18152]
ENSG00000139182	3771.31	3560.9	3815.7	2589.82	2515.36	2595.03	3715.97	2566.74	0.532774	5.57745e-40	3.71553e-38	CLSTN3	protein_coding	calsyntenin 3 [Source:HGNC Symbol;Acc:HGNC:18371]
ENSG00000178952	11259.5	10822.8	11257.5	8637.18	8892.23	8750.77	11113.3	8760.06	0.343196	9.08667e-40	6.02895e-38	TUFM	protein_coding	Tu translation elongation factor, mitochondrial [Source:HGNC Symbol;Acc:HGNC:12420]
ENSG00000094916	2132.89	2237.43	2205.99	3159.71	3195.36	3381.38	2192.1	3245.48	-0.565262	9.7591e-40	6.4492e-38	CBX5	protein_coding	chromobox 5 [Source:HGNC Symbol;Acc:HGNC:1555]
ENSG00000140990	3506.27	3604.29	3620.81	2527.59	2512.16	2348.72	3577.12	2462.82	0.538126	1.09814e-39	7.22807e-38	NDUFB10	protein_coding	NADH:ubiquinone oxidoreductase subunit B10 [Source:HGNC Symbol;Acc:HGNC:7696]
ENSG00000115866	945.971	929.323	980.79	1594.97	1612.6	1588.14	952.028	1598.57	-0.748348	1.33219e-39	8.7338e-38	DARS	protein_coding	aspartyl-tRNA synthetase [Source:HGNC Symbol;Acc:HGNC:2678]
ENSG00000115758	4215.49	4295.86	4226.56	3117.92	3097.31	3057.77	4245.97	3091	0.458055	2.18303e-39	1.42552e-37	ODC1	protein_coding	ornithine decarboxylase 1 [Source:HGNC Symbol;Acc:HGNC:8109]
ENSG00000114770	5094.42	4836.45	4943.98	6721.26	6548.47	6484.5	4958.28	6584.74	-0.410101	2.49293e-39	1.62149e-37	ABCC5	protein_coding	ATP binding cassette subfamily C member 5 [Source:HGNC Symbol;Acc:HGNC:56]
ENSG00000175567	1586.05	1488.9	1585.49	2373.78	2418.37	2374.49	1553.48	2388.88	-0.621758	3.26495e-39	2.1153e-37	UCP2	protein_coding	uncoupling protein 2 [Source:HGNC Symbol;Acc:HGNC:12518]
ENSG00000146701	9203.05	8834.89	9058.87	7148.01	6949.22	7058.54	9032.27	7051.92	0.356439	3.4775e-39	2.24421e-37	MDH2	protein_coding	malate dehydrogenase 2 [Source:HGNC Symbol;Acc:HGNC:6971]
ENSG00000023228	3966.17	3965.89	3921.05	2844.09	2888.4	2827.95	3951.04	2853.48	0.469744	3.87014e-39	2.48788e-37	NDUFS1	protein_coding	NADH:ubiquinone oxidoreductase core subunit S1 [Source:HGNC Symbol;Acc:HGNC:7707]
ENSG00000166741	1545.19	1611.85	1593.91	2478.69	2374.67	2401.28	1583.65	2418.21	-0.610798	4.30122e-39	2.75428e-37	NNMT	protein_coding	nicotinamide N-methyltransferase [Source:HGNC Symbol;Acc:HGNC:7861]
ENSG00000145730	681.979	718.688	705.831	1259.79	1239.56	1284.12	702.166	1261.16	-0.844221	5.0294e-39	3.20814e-37	PAM	protein_coding	peptidylglycine alpha-amidating monooxygenase [Source:HGNC Symbol;Acc:HGNC:8596]
ENSG00000185658	2843.15	3007.64	2930.78	4098.55	4033.11	4174.93	2927.19	4102.2	-0.486307	5.09439e-39	3.2371e-37	BRWD1	protein_coding	bromodomain and WD repeat domain containing 1 [Source:HGNC Symbol;Acc:HGNC:12760]
ENSG00000177889	717.597	751.233	713.206	1342.47	1255.55	1320.19	727.345	1306.07	-0.844269	7.29227e-39	4.61592e-37	UBE2N	protein_coding	ubiquitin conjugating enzyme E2 N [Source:HGNC Symbol;Acc:HGNC:12492]
ENSG00000168286	274.468	229.619	247.568	624.117	689.593	599.806	250.551	637.839	-1.35002	1.19264e-38	7.52047e-37	THAP11	protein_coding	THAP domain containing 11 [Source:HGNC Symbol;Acc:HGNC:23194]
ENSG00000183283	3082	3118.84	3168.87	4209.68	4389.09	4325.4	3123.23	4308.06	-0.463539	1.3294e-38	8.35094e-37	DAZAP2	protein_coding	DAZ associated protein 2 [Source:HGNC Symbol;Acc:HGNC:2684]
ENSG00000152558	5595.16	5686.22	5569.75	4322.59	4126.9	4161.54	5617.05	4203.68	0.417686	1.98155e-38	1.24004e-36	TMEM123	protein_coding	transmembrane protein 123 [Source:HGNC Symbol;Acc:HGNC:30138]
ENSG00000113441	2142.32	2192.22	2125.92	3030.79	3217.74	3243.28	2153.49	3163.94	-0.553803	2.79678e-38	1.7436e-36	LNPEP	protein_coding	leucyl and cystinyl aminopeptidase [Source:HGNC Symbol;Acc:HGNC:6656]
ENSG00000142949	16000.8	15999.2	15575.7	19662.4	19453.6	18959.8	15858.6	19358.6	-0.287741	3.37827e-38	2.09821e-36	PTPRF	protein_coding	protein tyrosine phosphatase, receptor type F [Source:HGNC Symbol;Acc:HGNC:9670]
ENSG00000198910	1662.52	1631.74	1706.64	1024.19	1020	999.676	1666.97	1014.62	0.715589	5.14354e-38	3.18264e-36	L1CAM	protein_coding	L1 cell adhesion molecule [Source:HGNC Symbol;Acc:HGNC:6470]
ENSG00000205363	1777.76	1721.24	1671.87	1045.53	1063.7	1053.27	1723.62	1054.17	0.709626	5.80561e-38	3.5789e-36	INSYN1	protein_coding	inhibitory synaptic factor 1 [Source:HGNC Symbol;Acc:HGNC:33753]
ENSG00000276293	441.034	484.549	505.67	989.519	1021.07	917.228	477.085	975.938	-1.03221	6.6388e-38	4.07731e-36	PIP4K2B	protein_coding	phosphatidylinositol-5-phosphate 4-kinase type 2 beta [Source:HGNC Symbol;Acc:HGNC:8998]
ENSG00000166619	6421.71	6422.99	6353.54	4899.59	4932.67	4988.07	6399.41	4940.11	0.373646	8.14827e-38	4.98584e-36	BLCAP	protein_coding	BLCAP, apoptosis inducing factor [Source:HGNC Symbol;Acc:HGNC:1055]
ENSG00000090339	4111.78	4057.2	4036.93	2918.77	2904.39	3024.79	4068.64	2949.32	0.464279	1.18752e-37	7.23946e-36	ICAM1	protein_coding	intercellular adhesion molecule 1 [Source:HGNC Symbol;Acc:HGNC:5344]
ENSG00000165732	9775.04	10239.7	10131.3	7946.38	7957.5	7976.79	10048.7	7960.22	0.336423	1.45579e-37	8.84231e-36	DDX21	protein_coding	DExD-box helicase 21 [Source:HGNC Symbol;Acc:HGNC:2744]
ENSG00000004779	3754.55	3710.96	3977.94	2696.51	2494.04	2667.18	3814.48	2619.24	0.541107	1.70562e-37	1.03218e-35	NDUFAB1	protein_coding	NADH:ubiquinone oxidoreductase subunit AB1 [Source:HGNC Symbol;Acc:HGNC:7694]
ENSG00000174607	1926.51	1960.8	1867.82	1234.9	1166.02	1207.86	1918.38	1202.92	0.672887	1.9471e-37	1.17402e-35	UGT8	protein_coding	UDP glycosyltransferase 8 [Source:HGNC Symbol;Acc:HGNC:12555]
ENSG00000004478	5440.12	5560.57	5630.85	4061.21	4200.44	4222.34	5543.85	4161.33	0.414442	2.10645e-37	1.26548e-35	FKBP4	protein_coding	FK506 binding protein 4 [Source:HGNC Symbol;Acc:HGNC:3720]
ENSG00000131844	2962.58	3009.45	2881.27	4157.23	3991.54	4134.74	2951.1	4094.5	-0.472345	2.75894e-37	1.65147e-35	MCCC2	protein_coding	methylcrotonoyl-CoA carboxylase 2 [Source:HGNC Symbol;Acc:HGNC:6937]
ENSG00000245532	31533.4	32077	30962.8	36926.1	37546	37518.8	31524.4	37330.3	-0.243639	2.84125e-37	1.6946e-35	NEAT1	lincRNA	nuclear paraspeckle assembly transcript 1 [Source:HGNC Symbol;Acc:HGNC:30815]
ENSG00000130147	4495.2	4589.66	4571.05	3221.05	3440.5	3192.78	4551.97	3284.78	0.471458	3.127e-37	1.85831e-35	SH3BP4	protein_coding	SH3 domain binding protein 4 [Source:HGNC Symbol;Acc:HGNC:10826]
ENSG00000091527	5927.25	6036.08	6186.03	7869.04	7639.88	7925.27	6049.79	7811.39	-0.368945	4.00794e-37	2.37331e-35	CDV3	protein_coding	CDV3 homolog [Source:HGNC Symbol;Acc:HGNC:26928]
ENSG00000131650	2158.03	1903.85	1936.3	1242.9	1115.93	1153.23	1999.39	1170.69	0.770019	5.3106e-37	3.13344e-35	KREMEN2	protein_coding	kringle containing transmembrane protein 2 [Source:HGNC Symbol;Acc:HGNC:18797]
ENSG00000122378	4550.72	4659.27	4760.67	3462.87	3396.8	3218.54	4656.89	3359.41	0.470591	8.79175e-37	5.16898e-35	PRXL2A	protein_coding	peroxiredoxin like 2A [Source:HGNC Symbol;Acc:HGNC:28651]
ENSG00000101365	2646.21	2778.02	2839.13	1897.25	1828.97	1762.32	2754.45	1829.51	0.589584	1.28703e-36	7.54007e-35	IDH3B	protein_coding	isocitrate dehydrogenase 3 (NAD(+)) beta [Source:HGNC Symbol;Acc:HGNC:5385]
ENSG00000184371	2126.6	1988.82	2007.93	1200.23	1338.68	1256.29	2041.12	1265.07	0.691265	2.46002e-36	1.43611e-34	CSF1	protein_coding	colony stimulating factor 1 [Source:HGNC Symbol;Acc:HGNC:2432]
ENSG00000014216	4937.28	4833.74	4718.54	6480.33	6339.56	6219.63	4829.85	6346.51	-0.394291	2.64426e-36	1.53823e-34	CAPN1	protein_coding	calpain 1 [Source:HGNC Symbol;Acc:HGNC:1476]
ENSG00000169504	3358.56	3569.94	3485.96	2487.58	2401.32	2444.57	3471.49	2444.49	0.506029	3.44281e-36	1.99574e-34	CLIC4	protein_coding	chloride intracellular channel 4 [Source:HGNC Symbol;Acc:HGNC:13518]
ENSG00000101079	2319.36	2357.66	2420.9	1408.26	1527.34	1594.33	2365.97	1509.98	0.649414	3.97041e-36	2.29354e-34	NDRG3	protein_coding	NDRG family member 3 [Source:HGNC Symbol;Acc:HGNC:14462]
ENSG00000231389	1525.29	1601.91	1597.08	2350.66	2370.41	2359.03	1574.76	2360.03	-0.58313	4.75652e-36	2.73806e-34	HLA-DPA1	protein_coding	major histocompatibility complex, class II, DP alpha 1 [Source:HGNC Symbol;Acc:HGNC:4938]
ENSG00000139644	17133.3	17666.2	17554.1	14517.4	14551.8	14304.6	17451.2	14457.9	0.271573	5.72608e-36	3.28474e-34	TMBIM6	protein_coding	transmembrane BAX inhibitor motif containing 6 [Source:HGNC Symbol;Acc:HGNC:11723]
ENSG00000159167	2042.8	2003.29	2016.36	1325.58	1320.56	1227.44	2020.81	1291.19	0.645503	7.28247e-36	4.1631e-34	STC1	protein_coding	stanniocalcin 1 [Source:HGNC Symbol;Acc:HGNC:11373]
ENSG00000117118	2002.99	2107.25	2109.07	1348.7	1285.39	1360.38	2073.1	1331.49	0.638505	7.95855e-36	4.5339e-34	SDHB	protein_coding	succinate dehydrogenase complex iron sulfur subunit B [Source:HGNC Symbol;Acc:HGNC:10681]
ENSG00000179562	1258.15	1191.49	1203.07	1914.14	1963.26	1871.56	1217.57	1916.32	-0.654763	9.47824e-36	5.3811e-34	GCC1	protein_coding	GRIP and coiled-coil domain containing 1 [Source:HGNC Symbol;Acc:HGNC:19095]
ENSG00000180398	1641.57	1571.17	1578.11	2423.57	2328.84	2430.14	1596.95	2394.18	-0.584988	1.14064e-35	6.45359e-34	MCFD2	protein_coding	multiple coagulation factor deficiency 2 [Source:HGNC Symbol;Acc:HGNC:18451]
ENSG00000135940	4756.05	4691.81	4995.6	3600.68	3503.39	3488.56	4814.49	3530.87	0.446474	1.23695e-35	6.97465e-34	COX5B	protein_coding	cytochrome c oxidase subunit 5B [Source:HGNC Symbol;Acc:HGNC:2269]
ENSG00000090857	2359.17	2437.21	2428.27	1592.3	1654.17	1611.85	2408.22	1619.44	0.573285	1.4912e-35	8.35223e-34	PDPR	protein_coding	pyruvate dehydrogenase phosphatase regulatory subunit [Source:HGNC Symbol;Acc:HGNC:30264]
ENSG00000118058	1929.66	1923.73	1852.02	2759.63	2723.2	2884.63	1901.8	2789.15	-0.552059	1.49138e-35	8.35223e-34	KMT2A	protein_coding	lysine methyltransferase 2A [Source:HGNC Symbol;Acc:HGNC:7132]
ENSG00000171346	383.417	326.348	385.574	790.371	762.069	797.679	365.113	783.373	-1.10489	2.1735e-35	1.21312e-33	KRT15	protein_coding	keratin 15 [Source:HGNC Symbol;Acc:HGNC:6421]
ENSG00000144959	1350.34	1319.85	1424.3	806.374	756.74	801.802	1364.83	788.305	0.790334	2.40874e-35	1.33989e-33	NCEH1	protein_coding	neutral cholesterol ester hydrolase 1 [Source:HGNC Symbol;Acc:HGNC:29260]
ENSG00000123908	2804.39	2908.2	2806.47	1791.45	1968.59	1955.04	2839.69	1905.02	0.577825	2.8756e-35	1.59422e-33	AGO2	protein_coding	argonaute 2, RISC catalytic component [Source:HGNC Symbol;Acc:HGNC:3263]
ENSG00000115107	2826.39	2875.66	2846.5	1991.49	2022.95	1940.61	2849.52	1985.01	0.521787	3.73364e-35	2.06299e-33	STEAP3	protein_coding	STEAP3 metalloreductase [Source:HGNC Symbol;Acc:HGNC:24592]
ENSG00000112902	2124.51	2189.51	2146.99	3021.9	3042.95	3086.63	2153.67	3050.49	-0.501632	5.71534e-35	3.14744e-33	SEMA5A	protein_coding	semaphorin 5A [Source:HGNC Symbol;Acc:HGNC:10736]
ENSG00000178974	701.883	735.864	784.842	1293.58	1386.65	1267.63	740.863	1315.95	-0.82854	9.40152e-35	5.16022e-33	FBXO34	protein_coding	F-box protein 34 [Source:HGNC Symbol;Acc:HGNC:20201]
ENSG00000129128	1480.24	1595.58	1638.16	2383.56	2356.55	2514.65	1571.33	2418.25	-0.621533	1.27438e-34	6.97155e-33	SPCS3	protein_coding	signal peptidase complex subunit 3 [Source:HGNC Symbol;Acc:HGNC:26212]
ENSG00000160161	2325.64	2228.39	2162.79	1374.48	1486.83	1481.99	2238.94	1447.77	0.630276	2.00027e-34	1.09064e-32	CILP2	protein_coding	cartilage intermediate layer protein 2 [Source:HGNC Symbol;Acc:HGNC:24213]
ENSG00000137309	7379.21	7084.73	7131	5396.57	5696.87	5547.69	7198.31	5547.04	0.376311	2.41622e-34	1.3131e-32	HMGA1	protein_coding	high mobility group AT-hook 1 [Source:HGNC Symbol;Acc:HGNC:5010]
ENSG00000137076	6236.29	6140.94	5954.27	4635.54	4744.01	4709.81	6110.5	4696.46	0.380134	2.84597e-34	1.54158e-32	TLN1	protein_coding	talin 1 [Source:HGNC Symbol;Acc:HGNC:11845]
ENSG00000214357	270.278	238.659	253.889	626.785	594.734	568.888	254.275	596.802	-1.23382	2.98299e-34	1.61052e-32	NEURL1B	protein_coding	neuralized E3 ubiquitin protein ligase 1B [Source:HGNC Symbol;Acc:HGNC:35422]
ENSG00000170100	647.409	582.183	582.574	1068.65	1139.37	1122.32	604.055	1110.11	-0.878128	3.78029e-34	2.03434e-32	ZNF778	protein_coding	zinc finger protein 778 [Source:HGNC Symbol;Acc:HGNC:26479]
ENSG00000135316	4565.39	4878.94	4610.03	6137.15	6138.12	6278.38	4684.79	6184.55	-0.399818	4.40333e-34	2.36193e-32	SYNCRIP	protein_coding	synaptotagmin binding cytoplasmic RNA interacting protein [Source:HGNC Symbol;Acc:HGNC:16918]
ENSG00000213593	2636.78	2670.45	2647.39	1847.46	1863.07	1829.3	2651.54	1846.61	0.522145	5.80801e-34	3.10531e-32	TMX2	protein_coding	thioredoxin related transmembrane protein 2 [Source:HGNC Symbol;Acc:HGNC:30739]
ENSG00000111269	333.133	310.076	320.258	712.134	656.552	700.804	321.155	689.83	-1.10493	8.00381e-34	4.26552e-32	CREBL2	protein_coding	cAMP responsive element binding protein like 2 [Source:HGNC Symbol;Acc:HGNC:2350]
ENSG00000066777	824.451	867.85	798.538	1357.59	1414.36	1446.95	830.28	1406.3	-0.758256	8.72955e-34	4.63733e-32	ARFGEF1	protein_coding	ADP ribosylation factor guanine nucleotide exchange factor 1 [Source:HGNC Symbol;Acc:HGNC:15772]
ENSG00000174939	1738.99	1648.91	1721.39	1107.76	1025.33	1007.92	1703.1	1047	0.699681	9.69131e-34	5.13174e-32	ASPHD1	protein_coding	aspartate beta-hydroxylase domain containing 1 [Source:HGNC Symbol;Acc:HGNC:27380]
ENSG00000174013	1094.73	1050.46	1170.42	1833.23	1713.86	1838.58	1105.2	1795.22	-0.701673	9.84299e-34	5.1954e-32	FBXO45	protein_coding	F-box protein 45 [Source:HGNC Symbol;Acc:HGNC:29148]
ENSG00000168003	9502.66	9267.91	9626.7	7674.33	7281.76	7187.36	9465.76	7381.15	0.357993	1.14643e-33	6.0319e-32	SLC3A2	protein_coding	solute carrier family 3 member 2 [Source:HGNC Symbol;Acc:HGNC:11026]
ENSG00000188807	3936.83	3706.44	3734.59	2684.95	2726.4	2790.85	3792.62	2734.06	0.472143	2.00313e-33	1.05059e-31	TMEM201	protein_coding	transmembrane protein 201 [Source:HGNC Symbol;Acc:HGNC:33719]
ENSG00000123836	2093.08	2270.87	2088	1360.26	1358.93	1437.68	2150.65	1385.62	0.635548	2.13891e-33	1.11826e-31	PFKFB2	protein_coding	6-phosphofructo-2-kinase/fructose-2,6-biphosphatase 2 [Source:HGNC Symbol;Acc:HGNC:8873]
ENSG00000173432	3022.29	2798.82	3158.33	4403.49	4236.68	4184.21	2993.15	4274.79	-0.515744	2.25483e-33	1.17514e-31	SAA1	protein_coding	serum amyloid A1 [Source:HGNC Symbol;Acc:HGNC:10513]
ENSG00000197956	3261.14	3064.59	3292.12	2288.43	2190.28	2238.45	3205.95	2239.05	0.51648	2.74604e-33	1.42664e-31	S100A6	protein_coding	S100 calcium binding protein A6 [Source:HGNC Symbol;Acc:HGNC:10496]
ENSG00000174695	1498.05	1478.96	1490.67	2234.2	2174.3	2209.59	1489.23	2206.03	-0.567418	2.95102e-33	1.52833e-31	TMEM167A	protein_coding	transmembrane protein 167A [Source:HGNC Symbol;Acc:HGNC:28330]
ENSG00000146278	1648.9	1652.53	1650.8	2447.57	2359.75	2416.74	1650.75	2408.02	-0.54514	3.8086e-33	1.96631e-31	PNRC1	protein_coding	proline rich nuclear receptor coactivator 1 [Source:HGNC Symbol;Acc:HGNC:17278]
ENSG00000235162	1081.11	931.131	989.217	526.321	527.586	464.798	1000.49	506.235	0.980943	4.91117e-33	2.52764e-31	C12orf75	protein_coding	chromosome 12 open reading frame 75 [Source:HGNC Symbol;Acc:HGNC:35164]
ENSG00000090530	2591.73	2677.68	2686.37	3562.45	3679.25	3696.74	2651.93	3646.15	-0.458637	5.39705e-33	2.76909e-31	P3H2	protein_coding	prolyl 3-hydroxylase 2 [Source:HGNC Symbol;Acc:HGNC:19317]
ENSG00000153404	1696.04	1698.64	1732.97	2433.35	2487.65	2581.64	1709.22	2500.88	-0.548768	5.56931e-33	2.84863e-31	PLEKHG4B	protein_coding	pleckstrin homology and RhoGEF domain containing G4B [Source:HGNC Symbol;Acc:HGNC:29399]
ENSG00000101236	1548.33	1561.23	1413.77	2292.88	2251.04	2330.17	1507.78	2291.36	-0.602963	6.18806e-33	3.15534e-31	RNF24	protein_coding	ring finger protein 24 [Source:HGNC Symbol;Acc:HGNC:13779]
ENSG00000181904	981.589	1036	967.094	551.215	512.665	548.276	994.893	537.385	0.888347	6.36352e-33	3.23482e-31	C5orf24	protein_coding	chromosome 5 open reading frame 24 [Source:HGNC Symbol;Acc:HGNC:26746]
ENSG00000105835	9511.05	10038.1	9874.27	12060.9	12057.7	12309.4	9807.81	12142.7	-0.307687	7.34612e-33	3.72286e-31	NAMPT	protein_coding	nicotinamide phosphoribosyltransferase [Source:HGNC Symbol;Acc:HGNC:30092]
ENSG00000053770	2134.98	2171.43	2217.57	1353.14	1379.19	1507.76	2174.66	1413.36	0.622495	8.98475e-33	4.53936e-31	AP5M1	protein_coding	adaptor related protein complex 5 subunit mu 1 [Source:HGNC Symbol;Acc:HGNC:20192]
ENSG00000179344	1005.68	953.731	996.592	1626.08	1708.53	1527.34	985.335	1620.65	-0.71854	9.63565e-33	4.85337e-31	HLA-DQB1	protein_coding	major histocompatibility complex, class II, DQ beta 1 [Source:HGNC Symbol;Acc:HGNC:4944]
ENSG00000100412	1863.66	1907.46	1929.97	1268.68	1239.56	1176.94	1900.36	1228.39	0.628753	1.03568e-32	5.20076e-31	ACO2	protein_coding	aconitase 2 [Source:HGNC Symbol;Acc:HGNC:118]
ENSG00000065057	1271.77	1227.65	1316.85	760.143	671.474	743.058	1272.09	724.892	0.808958	1.1989e-32	6.00212e-31	NTHL1	protein_coding	nth like DNA glycosylase 1 [Source:HGNC Symbol;Acc:HGNC:8028]
ENSG00000068650	3733.6	3886.34	3866.27	2758.74	2824.45	2854.74	3828.74	2812.65	0.445688	1.50979e-32	7.53574e-31	ATP11A	protein_coding	ATPase phospholipid transporting 11A [Source:HGNC Symbol;Acc:HGNC:13552]
ENSG00000135048	2976.2	3054.65	3074.05	3995.42	4188.72	4140.93	3034.97	4108.35	-0.43616	1.68776e-32	8.39863e-31	CEMIP2	protein_coding	cell migration inducing hyaluronidase 2 [Source:HGNC Symbol;Acc:HGNC:11869]
ENSG00000272391	1996.7	1957.18	1841.48	2722.29	2899.06	2839.29	1931.79	2820.21	-0.544827	2.94627e-32	1.46172e-30	POM121C	protein_coding	POM121 transmembrane nucleoporin C [Source:HGNC Symbol;Acc:HGNC:34005]
ENSG00000197747	3621.51	3473.21	3775.67	4958.27	4814.36	4861.31	3623.46	4877.98	-0.430052	4.78356e-32	2.36614e-30	S100A10	protein_coding	S100 calcium binding protein A10 [Source:HGNC Symbol;Acc:HGNC:10487]
ENSG00000115993	738.549	776.545	778.522	1295.35	1250.22	1303.7	764.538	1283.09	-0.746848	5.97897e-32	2.94861e-30	TRAK2	protein_coding	trafficking kinesin protein 2 [Source:HGNC Symbol;Acc:HGNC:13206]
ENSG00000030110	1911.85	1898.42	1855.18	1272.24	1229.97	1209.92	1888.48	1237.38	0.609261	6.1445e-32	3.02123e-30	BAK1	protein_coding	BCL2 antagonist/killer 1 [Source:HGNC Symbol;Acc:HGNC:949]
ENSG00000143416	1177.49	1316.24	1257.85	1995.04	1933.42	1918.97	1250.53	1949.14	-0.639468	6.3342e-32	3.10526e-30	SELENBP1	protein_coding	selenium binding protein 1 [Source:HGNC Symbol;Acc:HGNC:10719]
ENSG00000176994	2034.41	2022.27	2007.93	2839.65	2911.85	2794.97	2021.54	2848.82	-0.494724	6.75776e-32	3.3031e-30	SMCR8	protein_coding	Smith-Magenis syndrome chromosome region, candidate 8 [Source:HGNC Symbol;Acc:HGNC:17921]
ENSG00000155111	295.42	316.404	323.418	702.354	651.223	644.121	311.747	665.899	-1.09565	8.15841e-32	3.97596e-30	CDK19	protein_coding	cyclin dependent kinase 19 [Source:HGNC Symbol;Acc:HGNC:19338]
ENSG00000197150	1728.52	1589.25	1658.18	1067.76	1032.79	996.584	1658.65	1032.38	0.682373	8.39002e-32	4.07681e-30	ABCB8	protein_coding	ATP binding cassette subfamily B member 8 [Source:HGNC Symbol;Acc:HGNC:49]
ENSG00000163286	505.985	459.237	490.922	208.928	183.323	185.507	485.381	192.586	1.32938	1.02802e-31	4.98061e-30	ALPG	protein_coding	alkaline phosphatase, germ cell [Source:HGNC Symbol;Acc:HGNC:441]
ENSG00000197822	414.845	382.396	344.488	746.807	833.48	930.626	380.576	836.971	-1.13533	1.19486e-31	5.77199e-30	OCLN	protein_coding	occludin [Source:HGNC Symbol;Acc:HGNC:8104]
ENSG00000169851	3290.47	3382.81	3259.47	4612.42	4504.2	4304.79	3310.91	4473.81	-0.434291	1.39326e-31	6.71078e-30	PCDH7	protein_coding	protocadherin 7 [Source:HGNC Symbol;Acc:HGNC:8659]
ENSG00000169174	246.183	262.163	249.675	64.012	69.279	53.5909	252.674	62.294	2.02068	1.68884e-31	8.11084e-30	PCSK9	protein_coding	proprotein convertase subtilisin/kexin type 9 [Source:HGNC Symbol;Acc:HGNC:20001]
ENSG00000182568	1019.3	970.003	956.56	1522.95	1588.09	1591.24	981.955	1567.43	-0.674347	1.87055e-31	8.95748e-30	SATB1	protein_coding	SATB homeobox 1 [Source:HGNC Symbol;Acc:HGNC:10541]
ENSG00000029364	1470.81	1559.42	1554.94	2229.75	2441.82	2266.28	1528.39	2312.62	-0.596234	2.2542e-31	1.07635e-29	SLC39A9	protein_coding	solute carrier family 39 member 9 [Source:HGNC Symbol;Acc:HGNC:20182]
ENSG00000130414	3836.26	3829.39	3996.9	2914.33	2749.84	2870.2	3887.52	2844.79	0.44954	2.32353e-31	1.10625e-29	NDUFA10	protein_coding	NADH:ubiquinone oxidoreductase subunit A10 [Source:HGNC Symbol;Acc:HGNC:7684]
ENSG00000116688	3192	3253.53	3235.24	2341.77	2352.29	2371.4	3226.92	2355.15	0.454646	2.49923e-31	1.18649e-29	MFN2	protein_coding	mitofusin 2 [Source:HGNC Symbol;Acc:HGNC:16877]
ENSG00000166128	302.753	282.955	287.6	595.668	641.63	650.305	291.103	629.201	-1.11175	3.03203e-31	1.4353e-29	RAB8B	protein_coding	RAB8B, member RAS oncogene family [Source:HGNC Symbol;Acc:HGNC:30273]
ENSG00000008735	3318.76	3158.61	3186.78	2331.99	2121	2298.22	3221.38	2250.41	0.516157	3.66036e-31	1.72779e-29	MAPK8IP2	protein_coding	mitogen-activated protein kinase 8 interacting protein 2 [Source:HGNC Symbol;Acc:HGNC:6883]
ENSG00000218416	510.175	493.59	484.601	869.497	975.236	957.421	496.122	934.051	-0.911445	5.0682e-31	2.38552e-29	AC110619.1	processed_transcript	uncharacterized LOC100130449 [Source:NCBI gene;Acc:100130449]
ENSG00000091140	4814.71	4815.66	4877.61	3707.36	3745.33	3734.87	4836	3729.19	0.375024	6.0197e-31	2.82533e-29	DLD	protein_coding	dihydrolipoamide dehydrogenase [Source:HGNC Symbol;Acc:HGNC:2898]
ENSG00000185262	1189.01	1105.6	1106.15	1780.78	1709.59	1841.67	1133.59	1777.35	-0.649633	7.09923e-31	3.32256e-29	UBALD2	protein_coding	UBA like domain containing 2 [Source:HGNC Symbol;Acc:HGNC:28438]
ENSG00000165097	415.892	424.885	394.001	783.258	815.361	786.343	411.593	794.987	-0.948226	9.39451e-31	4.38437e-29	KDM1B	protein_coding	lysine demethylase 1B [Source:HGNC Symbol;Acc:HGNC:21577]
ENSG00000112576	6332.67	6018	6116.5	4800.01	4657.68	4841.73	6155.72	4766.47	0.368416	1.13859e-30	5.29878e-29	CCND3	protein_coding	cyclin D3 [Source:HGNC Symbol;Acc:HGNC:1585]
ENSG00000140465	642.171	654.503	652.104	319.171	290.972	321.545	649.593	310.563	1.06344	1.28176e-30	5.94831e-29	CYP1A1	protein_coding	cytochrome P450 family 1 subfamily A member 1 [Source:HGNC Symbol;Acc:HGNC:2595]
ENSG00000149428	4205.02	4115.96	4144.39	5345.01	5370.72	5282.82	4155.12	5332.85	-0.360242	1.41463e-30	6.54652e-29	HYOU1	protein_coding	hypoxia up-regulated 1 [Source:HGNC Symbol;Acc:HGNC:16931]
ENSG00000147604	28660.9	29258.3	29185.6	34617.2	33850.8	33390.2	29034.9	33952.7	-0.225822	1.78673e-30	8.24541e-29	RPL7	protein_coding	ribosomal protein L7 [Source:HGNC Symbol;Acc:HGNC:10363]
ENSG00000143553	149.805	173.57	159.075	498.76	403.95	425.635	160.817	442.782	-1.46099	1.95923e-30	9.01626e-29	SNAPIN	protein_coding	SNAP associated protein [Source:HGNC Symbol;Acc:HGNC:17145]
ENSG00000102144	12204.4	12231.3	12425.8	10279.3	10286.3	10139	12287.1	10234.9	0.263528	2.12945e-30	9.7724e-29	PGK1	protein_coding	phosphoglycerate kinase 1 [Source:HGNC Symbol;Acc:HGNC:8896]
ENSG00000132819	3174.19	3031.15	2999.26	2219.08	2203.07	2193.1	3068.2	2205.09	0.476181	2.15933e-30	9.88209e-29	RBM38	protein_coding	RNA binding motif protein 38 [Source:HGNC Symbol;Acc:HGNC:15818]
ENSG00000104853	3595.32	3580.78	3642.93	2680.5	2722.13	2637.29	3606.35	2679.98	0.428253	2.265e-30	1.0337e-28	CLPTM1	protein_coding	CLPTM1, transmembrane protein [Source:HGNC Symbol;Acc:HGNC:2087]
ENSG00000103534	1377.58	1481.67	1370.58	2065.28	2125.27	2209.59	1409.94	2133.38	-0.595705	2.29368e-30	1.04391e-28	TMC5	protein_coding	transmembrane channel like 5 [Source:HGNC Symbol;Acc:HGNC:22999]
ENSG00000173660	4498.34	4470.33	4740.66	3473.54	3447.96	3318.51	4569.78	3413.34	0.420255	3.20922e-30	1.45658e-28	UQCRH	protein_coding	ubiquinol-cytochrome c reductase hinge protein [Source:HGNC Symbol;Acc:HGNC:12590]
ENSG00000175215	3424.56	3406.31	3552.33	4637.32	4554.3	4484.11	3461.07	4558.58	-0.398056	3.48284e-30	1.57644e-28	CTDSP2	protein_coding	CTD small phosphatase 2 [Source:HGNC Symbol;Acc:HGNC:17077]
ENSG00000089057	4055.21	4274.16	4023.24	3085.91	2991.79	3087.66	4117.54	3055.12	0.430903	4.25877e-30	1.92238e-28	SLC23A2	protein_coding	solute carrier family 23 member 2 [Source:HGNC Symbol;Acc:HGNC:10973]
ENSG00000100100	70.1883	53.3366	61.1018	290.721	231.285	244.251	61.5423	255.419	-2.0609	4.27421e-30	1.92409e-28	PIK3IP1	protein_coding	phosphoinositide-3-kinase interacting protein 1 [Source:HGNC Symbol;Acc:HGNC:24942]
ENSG00000105856	1372.34	1326.18	1421.14	1995.04	2065.58	2108.59	1373.22	2056.41	-0.582877	4.93053e-30	2.21351e-28	HBP1	protein_coding	HMG-box transcription factor 1 [Source:HGNC Symbol;Acc:HGNC:23200]
ENSG00000259848	398.083	461.045	438.248	847.27	807.9	846.117	432.459	833.763	-0.945589	4.96275e-30	2.22194e-28	AC097374.1	transcribed_unprocessed_pseudogene	uncharacterized LOC442028 [Source:NCBI gene;Acc:442028]
ENSG00000103067	4276.25	4246.14	4334.02	5531.71	5447.46	5436.38	4285.47	5471.85	-0.353023	5.45435e-30	2.43544e-28	ESRP2	protein_coding	epithelial splicing regulatory protein 2 [Source:HGNC Symbol;Acc:HGNC:26152]
ENSG00000120053	1353.48	1369.58	1333.71	846.381	853.731	804.894	1352.25	835.002	0.695553	6.40026e-30	2.8501e-28	GOT1	protein_coding	glutamic-oxaloacetic transaminase 1 [Source:HGNC Symbol;Acc:HGNC:4432]
ENSG00000143556	933.4	941.979	942.864	1430.49	1522.01	1528.37	939.414	1493.62	-0.667968	1.01025e-29	4.48665e-28	S100A7	protein_coding	S100 calcium binding protein A7 [Source:HGNC Symbol;Acc:HGNC:10497]
ENSG00000109107	2980.39	3016.68	3078.27	2098.17	2257.43	2130.24	3025.11	2161.95	0.485519	1.02289e-29	4.53062e-28	ALDOC	protein_coding	aldolase, fructose-bisphosphate C [Source:HGNC Symbol;Acc:HGNC:418]
ENSG00000183011	1247.68	1193.29	1277.87	710.356	767.398	740.997	1239.61	739.584	0.745688	1.0672e-29	4.71423e-28	NAA38	protein_coding	N(alpha)-acetyltransferase 38, NatC auxiliary subunit [Source:HGNC Symbol;Acc:HGNC:28212]
ENSG00000168916	134.091	140.122	134.845	353.844	384.765	388.534	136.353	375.714	-1.46005	1.10989e-29	4.88972e-28	ZNF608	protein_coding	zinc finger protein 608 [Source:HGNC Symbol;Acc:HGNC:29238]
ENSG00000090060	4983.37	5272.19	5135.71	3910.96	3941.44	3978.09	5130.42	3943.5	0.38025	1.20122e-29	5.27802e-28	PAPOLA	protein_coding	poly(A) polymerase alpha [Source:HGNC Symbol;Acc:HGNC:14981]
ENSG00000145632	6546.37	6714.08	6786.52	8376.69	8182.39	8260.21	6682.32	8273.09	-0.308241	1.28666e-29	5.63843e-28	PLK2	protein_coding	polo like kinase 2 [Source:HGNC Symbol;Acc:HGNC:19699]
ENSG00000196850	1443.58	1459.98	1474.87	945.067	863.323	925.473	1459.47	911.288	0.67812	1.36926e-29	5.98451e-28	PPTC7	protein_coding	PTC7 protein phosphatase homolog [Source:HGNC Symbol;Acc:HGNC:30695]
ENSG00000165629	2790.77	2805.14	2920.25	2053.72	2042.13	2002.44	2838.72	2032.77	0.48131	1.39371e-29	6.07534e-28	ATP5F1C	protein_coding	ATP synthase F1 subunit gamma [Source:HGNC Symbol;Acc:HGNC:833]
ENSG00000115084	1302.15	1378.62	1346.35	1950.59	2005.89	2063.25	1342.37	2006.58	-0.578711	1.4312e-29	6.22234e-28	SLC35F5	protein_coding	solute carrier family 35 member F5 [Source:HGNC Symbol;Acc:HGNC:23617]
ENSG00000125505	6320.09	5839.91	5853.13	4552.86	4627.84	4465.56	6004.38	4548.75	0.400249	1.49361e-29	6.47015e-28	MBOAT7	protein_coding	membrane bound O-acyltransferase domain containing 7 [Source:HGNC Symbol;Acc:HGNC:15505]
ENSG00000106397	4411.39	4235.29	4228.67	3211.27	3282.76	3254.61	4291.78	3249.55	0.401424	1.49603e-29	6.47015e-28	PLOD3	protein_coding	procollagen-lysine,2-oxoglutarate 5-dioxygenase 3 [Source:HGNC Symbol;Acc:HGNC:9083]
ENSG00000086589	1172.25	1188.77	1193.59	1849.24	1753.29	1777.77	1184.87	1793.43	-0.598659	1.62393e-29	7.00495e-28	RBM22	protein_coding	RNA binding motif protein 22 [Source:HGNC Symbol;Acc:HGNC:25503]
ENSG00000198668	14078.5	14866.4	14743.4	11941.8	11806.2	12113.6	14562.8	11953.9	0.285001	1.70928e-29	7.35391e-28	CALM1	protein_coding	calmodulin 1 [Source:HGNC Symbol;Acc:HGNC:1442]
ENSG00000054793	3300.95	3088.1	2964.49	4244.35	4501	4236.77	3117.85	4327.38	-0.472697	2.17272e-29	9.32351e-28	ATP9A	protein_coding	ATPase phospholipid transporting 9A (putative) [Source:HGNC Symbol;Acc:HGNC:13540]
ENSG00000104140	4781.19	4689.1	4689.04	3714.48	3516.18	3569.98	4719.78	3600.21	0.389724	2.20734e-29	9.44752e-28	RHOV	protein_coding	ras homolog family member V [Source:HGNC Symbol;Acc:HGNC:18313]
ENSG00000111647	1613.28	1639.87	1576.01	1047.31	1034.92	1054.3	1609.72	1045.51	0.622907	2.28522e-29	9.75558e-28	UHRF1BP1L	protein_coding	UHRF1 binding protein 1 like [Source:HGNC Symbol;Acc:HGNC:29102]
ENSG00000124942	10158.5	10447.6	10156.6	12312.5	12349.8	12269.2	10254.2	12310.5	-0.263338	2.36863e-29	1.00856e-27	AHNAK	protein_coding	AHNAK nucleoprotein [Source:HGNC Symbol;Acc:HGNC:347]
ENSG00000160888	1324.15	1341.55	1344.24	1954.15	1973.92	1969.46	1336.65	1965.84	-0.556284	2.47343e-29	1.05048e-27	IER2	protein_coding	immediate early response 2 [Source:HGNC Symbol;Acc:HGNC:28871]
ENSG00000120705	6906.74	7198.63	7233.19	5694.4	5643.58	5635.29	7112.86	5657.76	0.330249	2.80051e-29	1.18634e-27	ETF1	protein_coding	eukaryotic translation termination factor 1 [Source:HGNC Symbol;Acc:HGNC:3477]
ENSG00000173334	1673	1627.22	1646.59	2394.23	2308.59	2366.24	1648.93	2356.35	-0.515799	2.97057e-29	1.25516e-27	TRIB1	protein_coding	tribbles pseudokinase 1 [Source:HGNC Symbol;Acc:HGNC:16891]
ENSG00000177426	2321.45	2248.27	2370.33	3116.14	3276.36	3184.53	2313.35	3192.35	-0.464757	3.34425e-29	1.40945e-27	TGIF1	protein_coding	TGFB induced factor homeobox 1 [Source:HGNC Symbol;Acc:HGNC:11776]
ENSG00000239305	328.942	284.763	303.402	611.671	657.618	659.58	305.703	642.956	-1.07369	3.56989e-29	1.50071e-27	RNF103	protein_coding	ring finger protein 103 [Source:HGNC Symbol;Acc:HGNC:12859]
ENSG00000204257	467.224	499.918	516.205	907.726	894.232	893.525	494.449	898.494	-0.861637	3.61344e-29	1.51517e-27	HLA-DMA	protein_coding	major histocompatibility complex, class II, DM alpha [Source:HGNC Symbol;Acc:HGNC:4934]
ENSG00000116574	298.562	298.323	311.83	659.68	632.038	598.775	302.905	630.164	-1.05829	4.28931e-29	1.79402e-27	RHOU	protein_coding	ras homolog family member U [Source:HGNC Symbol;Acc:HGNC:17794]
ENSG00000006118	6019.44	5601.25	5627.69	4448.84	4401.88	4275.93	5749.46	4375.55	0.393346	4.47805e-29	1.86823e-27	TMEM132A	protein_coding	transmembrane protein 132A [Source:HGNC Symbol;Acc:HGNC:31092]
ENSG00000159388	518.556	582.183	493.029	984.185	978.433	958.452	531.256	973.69	-0.871514	4.59172e-29	1.91083e-27	BTG2	protein_coding	BTG anti-proliferation factor 2 [Source:HGNC Symbol;Acc:HGNC:1131]
ENSG00000075415	5597.26	5650.97	5684.58	4452.39	4474.36	4466.59	5644.27	4464.45	0.338396	5.01933e-29	2.08353e-27	SLC25A3	protein_coding	solute carrier family 25 member 3 [Source:HGNC Symbol;Acc:HGNC:10989]
ENSG00000213585	4810.52	4982.9	4928.18	3677.14	3814.61	3836.9	4907.2	3776.22	0.378842	7.58727e-29	3.14159e-27	VDAC1	protein_coding	voltage dependent anion channel 1 [Source:HGNC Symbol;Acc:HGNC:12669]
ENSG00000163539	505.985	579.471	516.205	1049.09	1012.54	921.351	533.887	994.326	-0.895785	8.79386e-29	3.63209e-27	CLASP2	protein_coding	cytoplasmic linker associated protein 2 [Source:HGNC Symbol;Acc:HGNC:17078]
ENSG00000007168	1754.71	1799.88	1825.68	2496.47	2538.81	2536.29	1793.42	2523.86	-0.492583	9.08154e-29	3.74155e-27	PAFAH1B1	protein_coding	platelet activating factor acetylhydrolase 1b regulatory subunit 1 [Source:HGNC Symbol;Acc:HGNC:8574]
ENSG00000144802	1001.49	889.546	929.169	1487.39	1502.82	1505.7	940.07	1498.64	-0.674058	1.04708e-28	4.30318e-27	NFKBIZ	protein_coding	NFKB inhibitor zeta [Source:HGNC Symbol;Acc:HGNC:29805]
ENSG00000075785	6049.82	6109.3	6287.17	4890.7	4894.3	4800.51	6148.76	4861.83	0.338577	1.04973e-28	4.30336e-27	RAB7A	protein_coding	RAB7A, member RAS oncogene family [Source:HGNC Symbol;Acc:HGNC:9788]
ENSG00000151882	1214.15	1341.55	1392.7	1963.92	2042.13	2068.4	1316.14	2024.82	-0.620585	1.07253e-28	4.38595e-27	CCL28	protein_coding	C-C motif chemokine ligand 28 [Source:HGNC Symbol;Acc:HGNC:17700]
ENSG00000184330	182.28	166.338	165.396	400.964	438.057	489.532	171.338	442.851	-1.36931	1.28393e-28	5.23747e-27	S100A7A	protein_coding	S100 calcium binding protein A7A [Source:HGNC Symbol;Acc:HGNC:21657]
ENSG00000198561	6323.24	6716.8	6695.92	8203.32	8378.5	8201.46	6578.65	8261.09	-0.328067	1.38531e-28	5.63712e-27	CTNND1	protein_coding	catenin delta 1 [Source:HGNC Symbol;Acc:HGNC:2515]
ENSG00000164236	1943.27	1855.93	1884.68	1258.01	1257.68	1305.76	1894.63	1273.82	0.572591	1.50054e-28	6.09103e-27	ANKRD33B	protein_coding	ankyrin repeat domain 33B [Source:HGNC Symbol;Acc:HGNC:35240]
ENSG00000139514	2480.69	2508.63	2538.89	1766.55	1823.64	1767.47	2509.4	1785.89	0.491098	1.61468e-28	6.53825e-27	SLC7A1	protein_coding	solute carrier family 7 member 1 [Source:HGNC Symbol;Acc:HGNC:11057]
ENSG00000168827	4333.87	4385.35	4481.5	3351.74	3433.04	3324.7	4400.24	3369.83	0.385054	1.65116e-28	6.66963e-27	GFM1	protein_coding	G elongation factor mitochondrial 1 [Source:HGNC Symbol;Acc:HGNC:13780]
ENSG00000165240	171.804	194.362	208.589	446.306	466.834	481.287	191.585	464.809	-1.27753	1.79417e-28	7.22963e-27	ATP7A	protein_coding	ATPase copper transporting alpha [Source:HGNC Symbol;Acc:HGNC:869]
ENSG00000132821	1817.56	1581.11	1550.72	2582.71	2513.23	2452.81	1649.8	2516.25	-0.610059	2.06662e-28	8.30722e-27	VSTM2L	protein_coding	V-set and transmembrane domain containing 2 like [Source:HGNC Symbol;Acc:HGNC:16096]
ENSG00000134440	6179.72	6253.04	6476.79	5046.28	4957.18	4834.51	6303.18	4945.99	0.349304	2.15243e-28	8.63112e-27	NARS	protein_coding	asparaginyl-tRNA synthetase [Source:HGNC Symbol;Acc:HGNC:7643]
ENSG00000111670	1587.09	1553.99	1659.23	2261.76	2322.45	2319.87	1600.11	2301.36	-0.524707	2.26624e-28	9.0655e-27	GNPTAB	protein_coding	N-acetylglucosamine-1-phosphate transferase subunits alpha and beta [Source:HGNC Symbol;Acc:HGNC:29670]
ENSG00000117724	2298.41	2323.31	2249.18	3102.81	3078.12	3162.89	2290.3	3114.61	-0.443114	2.53779e-28	1.01272e-26	CENPF	protein_coding	centromere protein F [Source:HGNC Symbol;Acc:HGNC:1857]
ENSG00000102349	2021.84	2059.34	1982.65	2828.98	2766.9	2781.57	2021.28	2792.48	-0.466091	2.64972e-28	1.05484e-26	KLF8	protein_coding	Kruppel like factor 8 [Source:HGNC Symbol;Acc:HGNC:6351]
ENSG00000052841	2484.88	2507.72	2574.7	1821.68	1800.19	1710.79	2522.44	1777.55	0.504258	2.89289e-28	1.14888e-26	TTC17	protein_coding	tetratricopeptide repeat domain 17 [Source:HGNC Symbol;Acc:HGNC:25596]
ENSG00000123091	1494.91	1535.91	1480.14	983.296	975.236	951.238	1503.65	969.923	0.632644	2.95055e-28	1.16897e-26	RNF11	protein_coding	ring finger protein 11 [Source:HGNC Symbol;Acc:HGNC:10056]
ENSG00000157617	4891.19	5019.06	4803.87	3803.38	3813.54	3802.89	4904.71	3806.61	0.366139	2.95999e-28	1.1699e-26	C2CD2	protein_coding	C2 calcium dependent domain containing 2 [Source:HGNC Symbol;Acc:HGNC:1266]
ENSG00000078114	577.221	613.823	578.36	993.965	1016.8	1049.14	589.801	1019.97	-0.788501	3.47189e-28	1.36895e-26	NEBL	protein_coding	nebulette [Source:HGNC Symbol;Acc:HGNC:16932]
ENSG00000171621	1081.11	1101.08	1101.94	628.563	682.132	582.285	1094.71	630.993	0.795571	3.7692e-28	1.48264e-26	SPSB1	protein_coding	splA/ryanodine receptor domain and SOCS box containing 1 [Source:HGNC Symbol;Acc:HGNC:30628]
ENSG00000123933	784.643	717.784	735.329	1309.58	1178.81	1262.48	745.919	1250.29	-0.747246	4.66738e-28	1.83159e-26	MXD4	protein_coding	MAX dimerization protein 4 [Source:HGNC Symbol;Acc:HGNC:13906]
ENSG00000012660	2269.07	2175.95	2135.4	1525.62	1449.53	1538.68	2193.48	1504.61	0.54314	5.93573e-28	2.32379e-26	ELOVL5	protein_coding	ELOVL fatty acid elongase 5 [Source:HGNC Symbol;Acc:HGNC:21308]
ENSG00000112297	741.692	769.313	796.431	1226.01	1239.56	1326.37	769.145	1263.98	-0.716186	8.42877e-28	3.292e-26	CRYBG1	protein_coding	crystallin beta-gamma domain containing 1 [Source:HGNC Symbol;Acc:HGNC:356]
ENSG00000113140	20348.3	20519.2	20767.2	17859.4	17450.9	17432.5	20544.9	17580.9	0.224531	9.63515e-28	3.7543e-26	SPARC	protein_coding	secreted protein acidic and cysteine rich [Source:HGNC Symbol;Acc:HGNC:11219]
ENSG00000168924	3409.9	3497.62	3490.18	2540.92	2666.71	2513.62	3465.9	2573.75	0.430013	1.32623e-27	5.15067e-26	LETM1	protein_coding	leucine zipper and EF-hand containing transmembrane protein 1 [Source:HGNC Symbol;Acc:HGNC:6556]
ENSG00000163625	1111.49	1105.6	1120.9	1624.31	1741.57	1698.42	1112.67	1688.1	-0.600642	1.32812e-27	5.15067e-26	WDFY3	protein_coding	WD repeat and FYVE domain containing 3 [Source:HGNC Symbol;Acc:HGNC:20751]
ENSG00000111885	722.835	682.528	666.853	1113.99	1194.8	1154.26	690.739	1154.35	-0.740311	1.55699e-27	6.02413e-26	MAN1A1	protein_coding	mannosidase alpha class 1A member 1 [Source:HGNC Symbol;Acc:HGNC:6821]
ENSG00000164603	72.2835	72.3208	79.011	272.051	240.878	257.648	74.5384	256.859	-1.78753	1.7029e-27	6.57327e-26	BMT2	protein_coding	base methyltransferase of 25S rRNA 2 homolog [Source:HGNC Symbol;Acc:HGNC:26475]
ENSG00000134686	984.732	926.611	933.383	1439.38	1494.3	1610.82	948.242	1514.83	-0.675558	1.71058e-27	6.58753e-26	PHC2	protein_coding	polyhomeotic homolog 2 [Source:HGNC Symbol;Acc:HGNC:3183]
ENSG00000100242	866.355	785.585	831.196	1303.36	1416.49	1325.34	827.712	1348.4	-0.704538	1.80472e-27	6.93391e-26	SUN2	protein_coding	Sad1 and UNC84 domain containing 2 [Source:HGNC Symbol;Acc:HGNC:14210]
ENSG00000163468	6903.6	7145.3	7034.08	5692.63	5486.9	5699.18	7027.66	5626.24	0.320809	2.39691e-27	9.18779e-26	CCT3	protein_coding	chaperonin containing TCP1 subunit 3 [Source:HGNC Symbol;Acc:HGNC:1616]
ENSG00000151748	457.796	505.342	470.905	904.17	829.217	882.188	478.014	871.858	-0.866304	2.52957e-27	9.67386e-26	SAV1	protein_coding	salvador family WW domain containing protein 1 [Source:HGNC Symbol;Acc:HGNC:17795]
ENSG00000120437	1260.25	1265.61	1347.4	764.588	828.151	795.618	1291.09	796.119	0.698438	2.8816e-27	1.09947e-25	ACAT2	protein_coding	acetyl-CoA acetyltransferase 2 [Source:HGNC Symbol;Acc:HGNC:94]
ENSG00000139218	3072.57	3268	3159.39	4220.35	4113.04	4173.9	3166.65	4169.1	-0.396348	2.90956e-27	1.10758e-25	SCAF11	protein_coding	SR-related CTD associated factor 11 [Source:HGNC Symbol;Acc:HGNC:10784]
ENSG00000038532	2001.94	2242.85	2126.98	1378.04	1395.17	1473.75	2123.92	1415.65	0.586687	3.19055e-27	1.21175e-25	CLEC16A	protein_coding	C-type lectin domain containing 16A [Source:HGNC Symbol;Acc:HGNC:29013]
ENSG00000100934	486.081	493.59	503.563	827.711	975.236	989.37	494.411	930.772	-0.910819	3.26567e-27	1.23744e-25	SEC23A	protein_coding	Sec23 homolog A, coat complex II component [Source:HGNC Symbol;Acc:HGNC:10701]
ENSG00000162129	1011.97	957.347	1026.09	609.892	537.179	523.542	998.468	556.871	0.838894	3.48977e-27	1.31932e-25	CLPB	protein_coding	ClpB homolog, mitochondrial AAA ATPase chaperonin [Source:HGNC Symbol;Acc:HGNC:30664]
ENSG00000116285	1014.06	1004.36	1068.23	1574.52	1552.92	1580.93	1028.88	1569.45	-0.610006	3.60332e-27	1.35914e-25	ERRFI1	protein_coding	ERBB receptor feedback inhibitor 1 [Source:HGNC Symbol;Acc:HGNC:18185]
ENSG00000125868	6181.81	6312.7	6505.24	7916.16	7748.59	7853.12	6333.25	7839.29	-0.30805	3.63723e-27	1.36881e-25	DSTN	protein_coding	destrin, actin depolymerizing factor [Source:HGNC Symbol;Acc:HGNC:15750]
ENSG00000049860	3203.52	3248.11	3243.66	2448.46	2385.33	2407.47	3231.76	2413.75	0.420715	3.73242e-27	1.40144e-25	HEXB	protein_coding	hexosaminidase subunit beta [Source:HGNC Symbol;Acc:HGNC:4879]
ENSG00000035499	182.28	174.474	183.305	417.856	438.057	427.696	180.02	427.87	-1.24953	3.85508e-27	1.44421e-25	DEPDC1B	protein_coding	DEP domain containing 1B [Source:HGNC Symbol;Acc:HGNC:24902]
ENSG00000156804	1279.1	1321.66	1273.66	1932.81	1856.68	1894.23	1291.47	1894.57	-0.552724	4.1922e-27	1.56695e-25	FBXO32	protein_coding	F-box protein 32 [Source:HGNC Symbol;Acc:HGNC:16731]
ENSG00000146729	1692.9	1771.86	1704.53	1189.56	1111.66	1119.22	1723.1	1140.15	0.595068	4.42128e-27	1.64885e-25	NIPSNAP2	protein_coding	nipsnap homolog 2 [Source:HGNC Symbol;Acc:HGNC:4179]
ENSG00000129353	11135.9	11044.3	11288	9335.98	9428.34	9204.23	11156.1	9322.85	0.258846	5.58829e-27	2.07937e-25	SLC44A2	protein_coding	solute carrier family 44 member 2 [Source:HGNC Symbol;Acc:HGNC:17292]
ENSG00000198804	121858	126434	126892	109286	109500	109506	125061	109431	0.192646	5.74696e-27	2.13361e-25	MT-CO1	protein_coding	mitochondrially encoded cytochrome c oxidase I [Source:HGNC Symbol;Acc:HGNC:7419]
ENSG00000138759	3371.14	3503.04	3389.04	4444.39	4368.84	4483.08	3421.07	4432.11	-0.373106	5.96777e-27	2.20882e-25	FRAS1	protein_coding	Fraser extracellular matrix complex subunit 1 [Source:HGNC Symbol;Acc:HGNC:19185]
ENSG00000182240	2976.2	3024.82	3030.86	2121.29	2103.95	2294.1	3010.63	2173.11	0.470741	5.9763e-27	2.20882e-25	BACE2	protein_coding	beta-secretase 2 [Source:HGNC Symbol;Acc:HGNC:934]
ENSG00000175110	1470.81	1506.99	1544.4	1006.41	926.207	979.064	1507.4	970.561	0.633876	6.91506e-27	2.54568e-25	MRPS22	protein_coding	mitochondrial ribosomal protein S22 [Source:HGNC Symbol;Acc:HGNC:14508]
ENSG00000176853	2540.4	2723.78	2507.28	3475.32	3617.43	3509.17	2590.49	3533.97	-0.446607	6.91854e-27	2.54568e-25	FAM91A1	protein_coding	family with sequence similarity 91 member A1 [Source:HGNC Symbol;Acc:HGNC:26306]
ENSG00000185885	13351.5	13606.3	13773.2	10863.4	11464.1	11341.7	13577	11223	0.275191	7.15838e-27	2.62808e-25	IFITM1	protein_coding	interferon induced transmembrane protein 1 [Source:HGNC Symbol;Acc:HGNC:5412]
ENSG00000087111	2877.72	2783.45	2864.41	2110.62	2075.17	2051.91	2841.86	2079.23	0.449964	7.68548e-27	2.81534e-25	PIGS	protein_coding	phosphatidylinositol glycan anchor biosynthesis class S [Source:HGNC Symbol;Acc:HGNC:14937]
ENSG00000160285	3642.46	3458.74	3459.63	2652.05	2648.59	2577.51	3520.28	2626.05	0.422302	8.44192e-27	3.0856e-25	LSS	protein_coding	lanosterol synthase [Source:HGNC Symbol;Acc:HGNC:6708]
ENSG00000100241	4785.38	4406.15	4454.11	3462.87	3353.1	3444.24	4548.55	3420.07	0.410604	1.01224e-26	3.69166e-25	SBF1	protein_coding	SET binding factor 1 [Source:HGNC Symbol;Acc:HGNC:10542]
ENSG00000213853	3909.6	3724.52	3775.67	2882.32	2920.38	2773.33	3803.26	2858.67	0.411454	1.06104e-26	3.8611e-25	EMP2	protein_coding	epithelial membrane protein 2 [Source:HGNC Symbol;Acc:HGNC:3334]
ENSG00000123342	489.223	433.925	438.248	192.925	198.245	190.66	453.799	193.943	1.22594	1.06859e-26	3.88003e-25	MMP19	protein_coding	matrix metallopeptidase 19 [Source:HGNC Symbol;Acc:HGNC:7165]
ENSG00000144029	2484.88	2476.08	2531.51	1760.33	1804.45	1828.27	2497.49	1797.69	0.474711	1.16044e-26	4.2043e-25	MRPS5	protein_coding	mitochondrial ribosomal protein S5 [Source:HGNC Symbol;Acc:HGNC:14498]
ENSG00000027697	5009.56	5155.57	5222.1	6510.56	6353.42	6372.16	5129.08	6412.05	-0.322293	1.19082e-26	4.30375e-25	IFNGR1	protein_coding	interferon gamma receptor 1 [Source:HGNC Symbol;Acc:HGNC:5439]
ENSG00000101444	4382.06	4233.48	4322.43	3246.83	3391.47	3311.3	4312.66	3316.53	0.379144	1.1931e-26	4.30375e-25	AHCY	protein_coding	adenosylhomocysteinase [Source:HGNC Symbol;Acc:HGNC:343]
ENSG00000111669	15406.9	15268.7	15916	13065.6	13046.8	13187.5	15530.5	13100	0.245353	1.28271e-26	4.61691e-25	TPI1	protein_coding	triosephosphate isomerase 1 [Source:HGNC Symbol;Acc:HGNC:12009]
ENSG00000187608	4067.78	4037.31	3936.85	3124.14	3065.33	3048.5	4013.98	3079.32	0.382183	1.59438e-26	5.72625e-25	ISG15	protein_coding	ISG15 ubiquitin-like modifier [Source:HGNC Symbol;Acc:HGNC:4053]
ENSG00000009335	3938.93	4064.43	4001.12	3062.8	3038.68	3117.55	4001.49	3073.01	0.381212	1.81973e-26	6.52141e-25	UBE3C	protein_coding	ubiquitin protein ligase E3C [Source:HGNC Symbol;Acc:HGNC:16803]
ENSG00000150347	1353.48	1506.08	1413.77	2031.49	2128.46	2181.77	1424.44	2113.91	-0.567524	2.43197e-26	8.69666e-25	ARID5B	protein_coding	AT-rich interaction domain 5B [Source:HGNC Symbol;Acc:HGNC:17362]
ENSG00000167815	4521.39	4367.27	4417.24	3482.43	3408.53	3440.12	4435.3	3443.69	0.364469	2.58541e-26	9.22539e-25	PRDX2	protein_coding	peroxiredoxin 2 [Source:HGNC Symbol;Acc:HGNC:9353]
ENSG00000108679	42960.5	42291.4	43197.9	38004.5	37532.2	37488.9	42816.6	37675.2	0.184382	3.16344e-26	1.12636e-24	LGALS3BP	protein_coding	galectin 3 binding protein [Source:HGNC Symbol;Acc:HGNC:6564]
ENSG00000115652	810.833	787.393	818.554	1332.7	1229.97	1292.36	805.593	1285.01	-0.675245	3.20052e-26	1.13711e-24	UXS1	protein_coding	UDP-glucuronate decarboxylase 1 [Source:HGNC Symbol;Acc:HGNC:17729]
ENSG00000198355	7716.53	7224.85	7118.36	5906.89	5575.36	5581.7	7353.25	5687.98	0.369702	3.24007e-26	1.1487e-24	PIM3	protein_coding	Pim-3 proto-oncogene, serine/threonine kinase [Source:HGNC Symbol;Acc:HGNC:19310]
ENSG00000084073	2390.59	2565.58	2579.97	1779	1675.49	1809.72	2512.05	1754.74	0.517417	3.67005e-26	1.29835e-24	ZMPSTE24	protein_coding	zinc metallopeptidase STE24 [Source:HGNC Symbol;Acc:HGNC:12877]
ENSG00000205213	1460.34	1488	1395.86	2195.97	2005.89	2221.96	1448.07	2141.27	-0.56437	4.24574e-26	1.4988e-24	LGR4	protein_coding	leucine rich repeat containing G protein-coupled receptor 4 [Source:HGNC Symbol;Acc:HGNC:13299]
ENSG00000106086	1243.49	1400.31	1407.45	1975.48	2161.51	2034.39	1350.42	2057.13	-0.605716	4.2965e-26	1.51349e-24	PLEKHA8	protein_coding	pleckstrin homology domain containing A8 [Source:HGNC Symbol;Acc:HGNC:30037]
ENSG00000132879	703.979	695.184	668.96	377.849	352.79	355.555	689.374	362.065	0.927695	4.3891e-26	1.54282e-24	FBXO44	protein_coding	F-box protein 44 [Source:HGNC Symbol;Acc:HGNC:24847]
ENSG00000094975	585.601	599.359	604.697	992.187	1035.99	982.156	596.552	1003.44	-0.749717	4.80603e-26	1.68578e-24	SUCO	protein_coding	SUN domain containing ossification factor [Source:HGNC Symbol;Acc:HGNC:1240]
ENSG00000131236	1477.1	1506.08	1479.09	2126.62	2107.15	2086.95	1487.42	2106.91	-0.502166	6.23881e-26	2.18372e-24	CAP1	protein_coding	cyclase associated actin cytoskeleton regulatory protein 1 [Source:HGNC Symbol;Acc:HGNC:20040]
ENSG00000145332	393.893	415.845	402.429	737.028	736.489	750.272	404.056	741.263	-0.874423	8.54024e-26	2.98294e-24	KLHL8	protein_coding	kelch like family member 8 [Source:HGNC Symbol;Acc:HGNC:18644]
ENSG00000175166	5919.92	6234.05	6093.33	7474.29	7719.82	7456.35	6082.43	7550.15	-0.311192	1.20075e-25	4.18515e-24	PSMD2	protein_coding	proteasome 26S subunit, non-ATPase 2 [Source:HGNC Symbol;Acc:HGNC:9559]
ENSG00000106636	4670.14	4645.71	4862.86	3748.26	3655.8	3584.4	4726.24	3662.82	0.36693	1.21355e-25	4.22085e-24	YKT6	protein_coding	YKT6 v-SNARE homolog [Source:HGNC Symbol;Acc:HGNC:16959]
ENSG00000101928	313.229	317.308	325.525	643.677	607.524	616.295	318.687	622.498	-0.966917	1.24246e-25	4.31233e-24	MOSPD1	protein_coding	motile sperm domain containing 1 [Source:HGNC Symbol;Acc:HGNC:25235]
ENSG00000070610	2276.41	2149.74	2235.48	1602.97	1504.95	1557.23	2220.54	1555.05	0.51239	1.3666e-25	4.73324e-24	GBA2	protein_coding	glucosylceramidase beta 2 [Source:HGNC Symbol;Acc:HGNC:18986]
ENSG00000166411	709.217	753.945	712.152	410.744	378.37	355.555	725.104	381.556	0.924771	1.37821e-25	4.76347e-24	IDH3A	protein_coding	isocitrate dehydrogenase 3 (NAD(+)) alpha [Source:HGNC Symbol;Acc:HGNC:5384]
ENSG00000169908	2639.92	2787.97	2776.97	3636.24	3558.81	3665.82	2734.95	3620.29	-0.404317	1.41799e-25	4.89072e-24	TM4SF1	protein_coding	transmembrane 4 L six family member 1 [Source:HGNC Symbol;Acc:HGNC:11853]
ENSG00000161203	9453.43	9505.67	9952.22	7985.5	7469.34	7300.73	9637.11	7585.19	0.344633	1.56417e-25	5.38369e-24	AP2M1	protein_coding	adaptor related protein complex 2 subunit mu 1 [Source:HGNC Symbol;Acc:HGNC:564]
ENSG00000126602	5885.35	5891.43	5902.65	4775.12	4639.56	4790.2	5893.14	4734.96	0.315392	1.64844e-25	5.66194e-24	TRAP1	protein_coding	TNF receptor associated protein 1 [Source:HGNC Symbol;Acc:HGNC:16264]
ENSG00000198836	4676.43	4753.29	4894.47	3732.26	3701.63	3783.31	4774.73	3739.07	0.352628	1.78694e-25	6.1249e-24	OPA1	protein_coding	OPA1, mitochondrial dynamin like GTPase [Source:HGNC Symbol;Acc:HGNC:8140]
ENSG00000167193	1553.57	1587.44	1539.13	2179.08	2165.77	2246.69	1560.05	2197.18	-0.493484	2.0336e-25	6.95594e-24	CRK	protein_coding	CRK proto-oncogene, adaptor protein [Source:HGNC Symbol;Acc:HGNC:2362]
ENSG00000067798	670.456	700.608	701.618	1109.54	1112.73	1128.5	690.894	1116.92	-0.692475	2.09099e-25	7.13744e-24	NAV3	protein_coding	neuron navigator 3 [Source:HGNC Symbol;Acc:HGNC:15998]
ENSG00000147689	1525.29	1582.02	1584.43	2151.52	2227.59	2247.72	1563.91	2208.94	-0.497342	2.32851e-25	7.93183e-24	FAM83A	protein_coding	family with sequence similarity 83 member A [Source:HGNC Symbol;Acc:HGNC:28210]
ENSG00000144218	749.025	788.297	718.473	426.747	391.16	398.84	751.932	405.582	0.889811	2.57919e-25	8.76766e-24	AFF3	protein_coding	AF4/FMR2 family member 3 [Source:HGNC Symbol;Acc:HGNC:6473]
ENSG00000153071	325.8	349.852	371.878	660.569	671.474	674.008	349.177	668.684	-0.937121	2.79706e-25	9.48874e-24	DAB2	protein_coding	DAB2, clathrin adaptor protein [Source:HGNC Symbol;Acc:HGNC:2662]
ENSG00000124767	2001.94	2082.84	2047.96	1466.05	1383.45	1433.56	2044.25	1427.69	0.517393	2.82192e-25	9.55346e-24	GLO1	protein_coding	glyoxalase I [Source:HGNC Symbol;Acc:HGNC:4323]
ENSG00000158604	5508.21	5447.57	5907.91	4329.7	4430.66	4241.92	5621.23	4334.1	0.374813	2.9957e-25	1.0121e-23	TMED4	protein_coding	transmembrane p24 trafficking protein 4 [Source:HGNC Symbol;Acc:HGNC:22301]
ENSG00000140299	515.413	536.078	526.74	907.726	876.113	921.351	526.077	901.73	-0.777132	3.41804e-25	1.15244e-23	BNIP2	protein_coding	BCL2 interacting protein 2 [Source:HGNC Symbol;Acc:HGNC:1083]
ENSG00000170027	13504.4	13691.2	14035.5	11477.7	11772.1	11504.5	13743.7	11584.8	0.246672	4.5307e-25	1.52448e-23	YWHAG	protein_coding	tyrosine 3-monooxygenase/tryptophan 5-monooxygenase activation protein gamma [Source:HGNC Symbol;Acc:HGNC:12852]
ENSG00000152518	1978.89	1866.78	1981.6	2605.82	2705.08	2735.2	1942.42	2682.03	-0.465839	5.07203e-25	1.70315e-23	ZFP36L2	protein_coding	ZFP36 ring finger protein like 2 [Source:HGNC Symbol;Acc:HGNC:1108]
ENSG00000123684	692.455	765.697	764.826	1196.67	1168.15	1228.47	740.993	1197.76	-0.692037	6.02443e-25	2.01885e-23	LPGAT1	protein_coding	lysophosphatidylglycerol acyltransferase 1 [Source:HGNC Symbol;Acc:HGNC:28985]
ENSG00000173918	1629	1680.56	1571.79	1113.1	1065.83	1091.4	1627.12	1090.11	0.577841	7.05022e-25	2.35783e-23	C1QTNF1	protein_coding	C1q and TNF related 1 [Source:HGNC Symbol;Acc:HGNC:14324]
ENSG00000128512	319.514	339.004	285.493	617.005	619.248	634.846	314.67	623.7	-0.984386	7.69391e-25	2.5679e-23	DOCK4	protein_coding	dedicator of cytokinesis 4 [Source:HGNC Symbol;Acc:HGNC:19192]
ENSG00000213390	106.854	117.521	104.294	291.61	299.499	338.035	109.557	309.715	-1.4957	8.32392e-25	2.77257e-23	ARHGAP19	protein_coding	Rho GTPase activating protein 19 [Source:HGNC Symbol;Acc:HGNC:23724]
ENSG00000131507	3050.57	3035.67	2986.62	3884.29	3892.42	3909.04	3024.29	3895.25	-0.364963	9.06836e-25	3.01445e-23	NDFIP1	protein_coding	Nedd4 family interacting protein 1 [Source:HGNC Symbol;Acc:HGNC:17592]
ENSG00000168807	1175.39	1305.39	1233.62	1790.56	1843.89	1982.86	1238.14	1872.44	-0.59489	9.29599e-25	3.08392e-23	SNTB2	protein_coding	syntrophin beta 2 [Source:HGNC Symbol;Acc:HGNC:11169]
ENSG00000152556	4046.83	4134.04	4218.13	3198.82	3257.18	3152.59	4133	3202.86	0.367936	9.73771e-25	3.22398e-23	PFKM	protein_coding	phosphofructokinase, muscle [Source:HGNC Symbol;Acc:HGNC:8877]
ENSG00000077147	2836.87	2976	2822.27	3835.39	3762.38	3721.47	2878.38	3773.08	-0.390022	1.04452e-24	3.45129e-23	TM9SF3	protein_coding	transmembrane 9 superfamily member 3 [Source:HGNC Symbol;Acc:HGNC:21529]
ENSG00000110651	5556.4	5127.55	5282.15	4062.99	4081.07	4220.28	5322.03	4121.44	0.368509	1.0982e-24	3.62142e-23	CD81	protein_coding	CD81 molecule [Source:HGNC Symbol;Acc:HGNC:1701]
ENSG00000131174	2489.07	2532.13	2901.28	1776.33	1786.33	1813.84	2640.83	1792.17	0.558842	1.14447e-24	3.7665e-23	COX7B	protein_coding	cytochrome c oxidase subunit 7B [Source:HGNC Symbol;Acc:HGNC:2291]
ENSG00000251562	20530.6	21350	21051.7	24475.7	24048.3	24884.7	20977.4	24469.6	-0.222018	1.2549e-24	4.12172e-23	MALAT1	lincRNA	metastasis associated lung adenocarcinoma transcript 1 [Source:HGNC Symbol;Acc:HGNC:29665]
ENSG00000135069	1421.58	1415.68	1311.58	914.839	887.837	867.76	1382.95	890.145	0.635388	1.35601e-24	4.44498e-23	PSAT1	protein_coding	phosphoserine aminotransferase 1 [Source:HGNC Symbol;Acc:HGNC:19129]
ENSG00000139546	1079.01	1033.28	1032.41	644.566	651.223	633.815	1048.24	643.201	0.704351	1.43746e-24	4.70264e-23	TARBP2	protein_coding	TARBP2, RISC loading complex RNA binding subunit [Source:HGNC Symbol;Acc:HGNC:11569]
ENSG00000047457	61.8077	50.6246	63.2088	227.598	218.495	199.935	58.547	215.343	-1.88539	1.55979e-24	5.09276e-23	CP	protein_coding	ceruloplasmin [Source:HGNC Symbol;Acc:HGNC:2295]
ENSG00000196365	3944.17	3859.22	3940.01	3029.01	3044.01	3054.68	3914.47	3042.57	0.363342	1.64128e-24	5.34825e-23	LONP1	protein_coding	lon peptidase 1, mitochondrial [Source:HGNC Symbol;Acc:HGNC:9479]
ENSG00000088930	1785.09	1750.16	1661.34	2444.9	2365.08	2414.68	1732.2	2408.22	-0.475449	2.14393e-24	6.97243e-23	XRN2	protein_coding	5'-3' exoribonuclease 2 [Source:HGNC Symbol;Acc:HGNC:12836]
ENSG00000065978	13546.4	13922.7	14423.2	11768.4	11637.8	11535.4	13964.1	11647.2	0.261557	2.21907e-24	7.20261e-23	YBX1	protein_coding	Y-box binding protein 1 [Source:HGNC Symbol;Acc:HGNC:8014]
ENSG00000157870	2055.37	1993.34	2018.47	1438.49	1406.9	1452.11	2022.39	1432.5	0.497001	3.02649e-24	9.80405e-23	PRXL2B	protein_coding	peroxiredoxin like 2B [Source:HGNC Symbol;Acc:HGNC:28390]
ENSG00000168769	848.546	867.85	876.495	1297.13	1328.03	1351.11	864.297	1325.42	-0.616285	3.41811e-24	1.1051e-22	TET2	protein_coding	tet methylcytosine dioxygenase 2 [Source:HGNC Symbol;Acc:HGNC:25941]
ENSG00000067057	3511.51	3367.44	3424.86	2651.17	2591.04	2426.02	3434.6	2556.07	0.425193	4.58495e-24	1.47945e-22	PFKP	protein_coding	phosphofructokinase, platelet [Source:HGNC Symbol;Acc:HGNC:8878]
ENSG00000151414	1212.06	1252.96	1176.74	1734.55	1755.42	1831.36	1213.92	1773.78	-0.545899	4.76788e-24	1.53548e-22	NEK7	protein_coding	NIMA related kinase 7 [Source:HGNC Symbol;Acc:HGNC:13386]
ENSG00000205060	393.893	341.716	395.055	154.696	141.756	159.742	376.888	152.064	1.30661	4.84156e-24	1.55617e-22	SLC35B4	protein_coding	solute carrier family 35 member B4 [Source:HGNC Symbol;Acc:HGNC:20584]
ENSG00000116459	2907.05	3004.03	3129.89	2152.4	2304.33	2147.76	3013.66	2201.5	0.453648	5.1911e-24	1.66529e-22	ATP5PB	protein_coding	ATP synthase peripheral stalk-membrane subunit b [Source:HGNC Symbol;Acc:HGNC:840]
ENSG00000197930	1240.34	1267.42	1321.06	1861.68	1794.86	1871.56	1276.28	1842.7	-0.53043	5.40909e-24	1.73185e-22	ERO1A	protein_coding	endoplasmic reticulum oxidoreductase 1 alpha [Source:HGNC Symbol;Acc:HGNC:13280]
ENSG00000173801	11586.3	10754.1	10723.4	13552.8	13370.9	13414.2	11021.3	13445.9	-0.287211	5.95376e-24	1.90255e-22	JUP	protein_coding	junction plakoglobin [Source:HGNC Symbol;Acc:HGNC:6207]
ENSG00000149328	1340.91	1211.37	1276.82	832.157	805.768	781.19	1276.37	806.372	0.660712	6.18101e-24	1.97136e-22	GLB1L2	protein_coding	galactosidase beta 1 like 2 [Source:HGNC Symbol;Acc:HGNC:25129]
ENSG00000125656	1450.91	1592.87	1612.88	1023.3	1033.86	1011.01	1552.22	1022.72	0.602422	7.69815e-24	2.4505e-22	CLPP	protein_coding	caseinolytic mitochondrial matrix peptidase proteolytic subunit [Source:HGNC Symbol;Acc:HGNC:2084]
ENSG00000149547	1859.47	1935.49	1803.56	2580.04	2539.88	2546.6	1866.17	2555.5	-0.4528	8.06354e-24	2.56188e-22	EI24	protein_coding	EI24, autophagy associated transmembrane protein [Source:HGNC Symbol;Acc:HGNC:13276]
ENSG00000255690	896.735	828.073	869.121	502.317	516.928	489.532	864.643	502.926	0.781108	8.40357e-24	2.66479e-22	TRIL	protein_coding	TLR4 interactor with leucine rich repeats [Source:HGNC Symbol;Acc:HGNC:22200]
ENSG00000112651	1837.47	1676.94	1837.27	1233.12	1167.09	1205.79	1783.89	1202	0.567706	9.6022e-24	3.03904e-22	MRPL2	protein_coding	mitochondrial ribosomal protein L2 [Source:HGNC Symbol;Acc:HGNC:14056]
ENSG00000136240	5567.93	5835.39	5844.71	4512.85	4624.64	4643.85	5749.34	4593.78	0.324326	1.17466e-23	3.71064e-22	KDELR2	protein_coding	KDEL endoplasmic reticulum protein retention receptor 2 [Source:HGNC Symbol;Acc:HGNC:6305]
ENSG00000250722	547.888	566.814	578.36	950.401	907.022	965.666	564.354	941.03	-0.737924	1.18456e-23	3.73477e-22	SELENOP	protein_coding	selenoprotein P [Source:HGNC Symbol;Acc:HGNC:10751]
ENSG00000136986	6444.76	6829.8	6802.32	5380.57	5350.47	5443.6	6692.29	5391.55	0.31211	1.18877e-23	3.74088e-22	DERL1	protein_coding	derlin 1 [Source:HGNC Symbol;Acc:HGNC:28454]
ENSG00000138735	927.115	1036	1006.07	1531.84	1479.37	1496.42	989.728	1502.55	-0.601566	1.20538e-23	3.78594e-22	PDE5A	protein_coding	phosphodiesterase 5A [Source:HGNC Symbol;Acc:HGNC:8784]
ENSG00000111331	7285.97	7589.17	7423.87	6087.37	6144.52	6110.39	7433	6114.09	0.282269	1.24062e-23	3.88925e-22	OAS3	protein_coding	2'-5'-oligoadenylate synthetase 3 [Source:HGNC Symbol;Acc:HGNC:8088]
ENSG00000111816	329.99	315.5	286.546	581.443	606.458	638.968	310.679	608.956	-0.969514	1.33185e-23	4.16733e-22	FRK	protein_coding	fyn related Src family tyrosine kinase [Source:HGNC Symbol;Acc:HGNC:3955]
ENSG00000173559	690.36	696.088	701.618	1090.87	1114.86	1099.64	696.022	1101.79	-0.662376	1.38529e-23	4.32636e-22	NABP1	protein_coding	nucleic acid binding protein 1 [Source:HGNC Symbol;Acc:HGNC:26232]
ENSG00000148303	12804.7	12882.1	13123.2	15204.6	15091.1	14905.5	12936.7	15067.1	-0.220123	1.46938e-23	4.5803e-22	RPL7A	protein_coding	ribosomal protein L7a [Source:HGNC Symbol;Acc:HGNC:10364]
ENSG00000158715	1196.34	1072.16	1172.52	725.47	705.58	629.693	1147.01	686.914	0.737364	1.56376e-23	4.86531e-22	SLC45A3	protein_coding	solute carrier family 45 member 3 [Source:HGNC Symbol;Acc:HGNC:8642]
ENSG00000040199	1810.23	1821.58	1879.41	1146.88	1207.59	1330.5	1837.07	1228.32	0.58194	1.56918e-23	4.87302e-22	PHLPP2	protein_coding	PH domain and leucine rich repeat protein phosphatase 2 [Source:HGNC Symbol;Acc:HGNC:29149]
ENSG00000198948	1843.75	1870.4	1894.16	1338.92	1183.07	1296.49	1869.44	1272.83	0.552963	1.69915e-23	5.26672e-22	MFAP3L	protein_coding	microfibril associated protein 3 like [Source:HGNC Symbol;Acc:HGNC:29083]
ENSG00000075239	1929.66	2109.06	2157.53	1274.02	1432.48	1428.4	2065.41	1378.3	0.58547	1.71667e-23	5.31106e-22	ACAT1	protein_coding	acetyl-CoA acetyltransferase 1 [Source:HGNC Symbol;Acc:HGNC:93]
ENSG00000118242	433.701	401.381	363.451	752.141	721.568	726.569	399.511	733.426	-0.876737	2.2789e-23	7.03733e-22	MREG	protein_coding	melanoregulin [Source:HGNC Symbol;Acc:HGNC:25478]
ENSG00000166197	5639.16	5933.02	5899.49	4752	4620.38	4573.77	5823.89	4648.72	0.324995	2.28967e-23	7.0574e-22	NOLC1	protein_coding	nucleolar and coiled-body phosphoprotein 1 [Source:HGNC Symbol;Acc:HGNC:15608]
ENSG00000197081	8672.98	8881	8644.85	7116	7128.28	7416.15	8732.94	7220.15	0.274893	2.31158e-23	7.10802e-22	IGF2R	protein_coding	insulin like growth factor 2 receptor [Source:HGNC Symbol;Acc:HGNC:5467]
ENSG00000157741	632.743	617.439	714.259	1083.76	1045.58	1157.36	654.814	1095.57	-0.744025	2.3147e-23	7.10802e-22	UBN2	protein_coding	ubinuclein 2 [Source:HGNC Symbol;Acc:HGNC:21931]
ENSG00000134531	570.935	557.774	511.991	903.281	911.286	973.911	546.9	929.493	-0.764088	2.35059e-23	7.20484e-22	EMP1	protein_coding	epithelial membrane protein 1 [Source:HGNC Symbol;Acc:HGNC:3333]
ENSG00000134317	934.448	1017.92	983.95	1575.41	1478.31	1433.56	978.771	1495.76	-0.611868	2.47447e-23	7.5705e-22	GRHL1	protein_coding	grainyhead like transcription factor 1 [Source:HGNC Symbol;Acc:HGNC:17923]
ENSG00000168461	821.308	790.105	873.335	1274.02	1261.94	1331.53	828.249	1289.16	-0.639448	2.5061e-23	7.6531e-22	RAB31	protein_coding	RAB31, member RAS oncogene family [Source:HGNC Symbol;Acc:HGNC:9771]
ENSG00000179241	261.897	243.179	253.889	529.877	522.257	491.593	252.988	514.576	-1.0261	2.58477e-23	7.87877e-22	LDLRAD3	protein_coding	low density lipoprotein receptor class A domain containing 3 [Source:HGNC Symbol;Acc:HGNC:27046]
ENSG00000095303	2990.86	2917.24	2962.39	2223.53	2155.11	2280.7	2956.83	2219.78	0.413161	2.96465e-23	9.02007e-22	PTGS1	protein_coding	prostaglandin-endoperoxide synthase 1 [Source:HGNC Symbol;Acc:HGNC:9604]
ENSG00000136754	760.548	762.985	771.147	1219.78	1156.43	1192.4	764.893	1189.54	-0.637832	3.03833e-23	9.22724e-22	ABI1	protein_coding	abl interactor 1 [Source:HGNC Symbol;Acc:HGNC:11320]
ENSG00000280798	314.276	306.459	316.044	108.465	127.9	122.641	312.26	119.668	1.38722	3.20122e-23	9.70409e-22	LINC00294	lincRNA	long intergenic non-protein coding RNA 294 [Source:HGNC Symbol;Acc:HGNC:27456]
ENSG00000198898	2917.53	3026.63	2913.92	3775.82	3778.37	3963.66	2952.69	3839.29	-0.378018	3.34346e-23	1.01167e-21	CAPZA2	protein_coding	capping actin protein of muscle Z-line subunit alpha 2 [Source:HGNC Symbol;Acc:HGNC:1490]
ENSG00000131238	6248.86	6402.2	6432.55	5116.52	4817.56	5225.11	6361.2	5053.06	0.331833	3.42328e-23	1.03393e-21	PPT1	protein_coding	palmitoyl-protein thioesterase 1 [Source:HGNC Symbol;Acc:HGNC:9325]
ENSG00000061676	5064.04	5235.12	5332.71	4025.65	4210.03	4152.26	5210.62	4129.31	0.336203	3.80156e-23	1.14609e-21	NCKAP1	protein_coding	NCK associated protein 1 [Source:HGNC Symbol;Acc:HGNC:7666]
ENSG00000077274	215.803	244.083	247.568	505.873	493.48	477.165	235.818	492.173	-1.06097	4.0061e-23	1.20555e-21	CAPN6	protein_coding	calpain 6 [Source:HGNC Symbol;Acc:HGNC:1483]
ENSG00000074071	6066.58	5961.95	5861.56	4835.58	4865.52	4855.13	5963.36	4852.07	0.297619	4.48711e-23	1.34785e-21	MRPS34	protein_coding	mitochondrial ribosomal protein S34 [Source:HGNC Symbol;Acc:HGNC:16618]
ENSG00000118705	21531.1	21755	21466.8	18813.3	19077.3	18804.2	21584.3	18898.3	0.191914	4.53858e-23	1.36083e-21	RPN2	protein_coding	ribophorin II [Source:HGNC Symbol;Acc:HGNC:10382]
ENSG00000130477	177.042	229.619	205.429	55.1215	38.3699	58.7438	204.03	50.7451	2.00406	5.45255e-23	1.63191e-21	UNC13A	protein_coding	unc-13 homolog A [Source:HGNC Symbol;Acc:HGNC:23150]
ENSG00000066933	385.512	454.717	397.162	745.918	747.148	756.456	412.464	749.84	-0.859291	5.69632e-23	1.70179e-21	MYO9A	protein_coding	myosin IXA [Source:HGNC Symbol;Acc:HGNC:7608]
ENSG00000155846	1507.48	1533.2	1509.64	991.298	1001.88	1072.85	1516.77	1022.01	0.570502	5.72893e-23	1.70844e-21	PPARGC1B	protein_coding	PPARG coactivator 1 beta [Source:HGNC Symbol;Acc:HGNC:30022]
ENSG00000004961	1257.1	1330.7	1323.17	889.945	816.427	785.312	1303.66	830.561	0.648881	5.84546e-23	1.74005e-21	HCCS	protein_coding	holocytochrome c synthase [Source:HGNC Symbol;Acc:HGNC:4837]
ENSG00000141664	1603.86	1591.06	1641.32	1013.52	1061.57	1153.23	1612.08	1076.11	0.584176	6.66485e-23	1.9804e-21	ZCCHC2	protein_coding	zinc finger CCHC-type containing 2 [Source:HGNC Symbol;Acc:HGNC:22916]
ENSG00000188191	1590.24	1535.01	1491.73	1076.65	1016.8	1007.92	1538.99	1033.79	0.572836	6.85702e-23	2.03384e-21	PRKAR1B	protein_coding	protein kinase cAMP-dependent type I regulatory subunit beta [Source:HGNC Symbol;Acc:HGNC:9390]
ENSG00000159199	1493.86	1514.22	1515.96	1063.31	982.696	1002.77	1508.01	1016.26	0.568016	8.67584e-23	2.5687e-21	ATP5MC1	protein_coding	ATP synthase membrane subunit c locus 1 [Source:HGNC Symbol;Acc:HGNC:841]
ENSG00000109854	479.795	462.853	478.28	844.603	805.768	786.343	473.643	812.238	-0.779664	9.88938e-23	2.92276e-21	HTATIP2	protein_coding	HIV-1 Tat interactive protein 2 [Source:HGNC Symbol;Acc:HGNC:16637]
ENSG00000167085	2192.6	2376.64	2260.77	1644.75	1655.24	1615.97	2276.67	1638.65	0.475226	1.03223e-22	3.04525e-21	PHB	protein_coding	prohibitin [Source:HGNC Symbol;Acc:HGNC:8912]
ENSG00000065559	536.365	533.366	529.9	927.286	845.204	913.106	533.21	895.199	-0.748483	1.08674e-22	3.20037e-21	MAP2K4	protein_coding	mitogen-activated protein kinase kinase 4 [Source:HGNC Symbol;Acc:HGNC:6844]
ENSG00000196743	1940.13	1877.63	2025.84	1363.81	1312.04	1404.7	1947.87	1360.18	0.517116	1.1089e-22	3.25982e-21	GM2A	protein_coding	GM2 ganglioside activator [Source:HGNC Symbol;Acc:HGNC:4367]
ENSG00000157224	539.507	567.718	522.526	894.39	896.364	924.443	543.251	905.066	-0.734844	1.15917e-22	3.40155e-21	CLDN12	protein_coding	claudin 12 [Source:HGNC Symbol;Acc:HGNC:2034]
ENSG00000163435	5643.35	5701.59	5854.19	6998.65	6870.35	7070.9	5733.04	6979.97	-0.28415	1.24152e-22	3.63673e-21	ELF3	protein_coding	E74 like ETS transcription factor 3 [Source:HGNC Symbol;Acc:HGNC:3318]
ENSG00000109458	959.59	1022.44	1054.53	1459.83	1537.99	1557.23	1012.19	1518.35	-0.584023	1.39607e-22	4.08221e-21	GAB1	protein_coding	GRB2 associated binding protein 1 [Source:HGNC Symbol;Acc:HGNC:4066]
ENSG00000104969	2210.41	2233.81	2194.4	1659.87	1557.18	1587.11	2212.87	1601.39	0.46571	1.43859e-22	4.19911e-21	SGTA	protein_coding	small glutamine rich tetratricopeptide repeat containing alpha [Source:HGNC Symbol;Acc:HGNC:10819]
ENSG00000120885	8974.68	9122.37	9438.12	10869.6	11034.5	10872.8	9178.39	10925.6	-0.251416	1.49899e-22	4.36769e-21	CLU	protein_coding	clusterin [Source:HGNC Symbol;Acc:HGNC:2095]
ENSG00000213619	1453	1370.48	1479.09	954.846	973.104	940.932	1434.19	956.294	0.58393	1.52126e-22	4.42478e-21	NDUFS3	protein_coding	NADH:ubiquinone oxidoreductase core subunit S3 [Source:HGNC Symbol;Acc:HGNC:7710]
ENSG00000138674	1617.47	1553.99	1563.36	2165.74	2231.85	2141.57	1578.28	2179.72	-0.465932	1.53699e-22	4.46266e-21	SEC31A	protein_coding	SEC31 homolog A, COPII coat complex component [Source:HGNC Symbol;Acc:HGNC:17052]
ENSG00000121316	3062.1	3025.72	3162.55	2311.55	2358.68	2364.18	3083.46	2344.8	0.395061	1.73361e-22	5.02474e-21	PLBD1	protein_coding	phospholipase B domain containing 1 [Source:HGNC Symbol;Acc:HGNC:26215]
ENSG00000182158	932.353	904.01	909.153	1328.25	1384.51	1409.85	915.172	1374.21	-0.586076	1.85062e-22	5.3545e-21	CREB3L2	protein_coding	cAMP responsive element binding protein 3 like 2 [Source:HGNC Symbol;Acc:HGNC:23720]
ENSG00000189043	4500.44	4568.87	4808.08	3633.57	3420.25	3663.76	4625.79	3572.53	0.372064	2.21957e-22	6.41075e-21	NDUFA4	protein_coding	NDUFA4, mitochondrial complex associated [Source:HGNC Symbol;Acc:HGNC:7687]
ENSG00000253352	2636.78	2768.98	2629.49	3431.76	3546.02	3492.68	2678.42	3490.15	-0.380739	2.43036e-22	7.00733e-21	TUG1	bidirectional_promoter_lncRNA	taurine up-regulated 1 [Source:HGNC Symbol;Acc:HGNC:26066]
ENSG00000151729	803.499	905.818	849.105	520.098	487.085	452.431	852.807	486.538	0.808973	2.47855e-22	7.13382e-21	SLC25A4	protein_coding	solute carrier family 25 member 4 [Source:HGNC Symbol;Acc:HGNC:10990]
ENSG00000099795	1725.38	1609.14	1729.81	1170.89	1179.88	1102.74	1688.11	1151.17	0.551126	2.53301e-22	7.27789e-21	NDUFB7	protein_coding	NADH:ubiquinone oxidoreductase subunit B7 [Source:HGNC Symbol;Acc:HGNC:7702]
ENSG00000137868	1779.85	1773.67	1755.1	1228.68	1275.8	1239.8	1769.54	1248.09	0.50427	2.55097e-22	7.31677e-21	STRA6	protein_coding	stimulated by retinoic acid 6 [Source:HGNC Symbol;Acc:HGNC:30650]
ENSG00000136153	912.449	836.209	821.714	1330.03	1272.6	1356.26	856.791	1319.63	-0.624008	2.64824e-22	7.58261e-21	LMO7	protein_coding	LIM domain 7 [Source:HGNC Symbol;Acc:HGNC:6646]
ENSG00000143319	1306.34	1250.25	1312.64	1787	1895.05	1833.43	1289.74	1838.49	-0.51154	2.67527e-22	7.64672e-21	ISG20L2	protein_coding	interferon stimulated exonuclease gene 20 like 2 [Source:HGNC Symbol;Acc:HGNC:25745]
ENSG00000205189	2517.35	2495.97	2482	3156.15	3343.51	3403.02	2498.44	3300.89	-0.401009	2.68245e-22	7.65401e-21	ZBTB10	protein_coding	zinc finger and BTB domain containing 10 [Source:HGNC Symbol;Acc:HGNC:30953]
ENSG00000241468	2948.96	3124.26	3153.06	2340.88	2336.3	2224.02	3075.43	2300.4	0.418862	2.69435e-22	7.66496e-21	ATP5MF	protein_coding	ATP synthase membrane subunit f [Source:HGNC Symbol;Acc:HGNC:848]
ENSG00000153786	2364.4	2320.59	2262.87	1534.51	1670.16	1727.27	2315.96	1643.98	0.49598	2.69557e-22	7.66496e-21	ZDHHC7	protein_coding	zinc finger DHHC-type containing 7 [Source:HGNC Symbol;Acc:HGNC:18459]
ENSG00000011347	2934.29	2961.54	2932.89	2268.87	2206.27	2249.79	2942.91	2241.64	0.392421	2.75634e-22	7.82431e-21	SYT7	protein_coding	synaptotagmin 7 [Source:HGNC Symbol;Acc:HGNC:11514]
ENSG00000145390	1883.56	1933.68	1988.97	2542.7	2643.26	2783.63	1935.4	2656.53	-0.456238	2.77635e-22	7.86761e-21	USP53	protein_coding	ubiquitin specific peptidase 53 [Source:HGNC Symbol;Acc:HGNC:29255]
ENSG00000282815	721.788	740.384	764.826	391.185	413.542	448.308	742.333	417.678	0.831365	3.01824e-22	8.53841e-21	TEX13C	protein_coding	TEX13 family member C [Source:HGNC Symbol;Acc:HGNC:52277]
ENSG00000157483	1861.56	1862.26	1898.37	1369.15	1299.25	1319.16	1874.06	1329.18	0.49455	3.26032e-22	9.20749e-21	MYO1E	protein_coding	myosin IE [Source:HGNC Symbol;Acc:HGNC:7599]
ENSG00000154723	1180.63	1134.53	1200.97	792.149	709.844	716.263	1172.04	739.418	0.661828	3.56559e-22	1.00524e-20	ATP5PF	protein_coding	ATP synthase peripheral stalk subunit F6 [Source:HGNC Symbol;Acc:HGNC:847]
ENSG00000171262	473.509	472.797	559.398	972.627	848.402	865.699	501.902	895.576	-0.838424	4.67598e-22	1.31605e-20	FAM98B	protein_coding	family with sequence similarity 98 member B [Source:HGNC Symbol;Acc:HGNC:26773]
ENSG00000021355	931.305	851.578	948.132	1412.71	1342.95	1390.27	910.338	1381.98	-0.604503	5.11448e-22	1.43701e-20	SERPINB1	protein_coding	serpin family B member 1 [Source:HGNC Symbol;Acc:HGNC:3311]
ENSG00000172216	7713.39	7374.01	7179.46	9197.29	8967.9	8945.55	7422.29	9036.91	-0.284285	6.01747e-22	1.68785e-20	CEBPB	protein_coding	CCAAT enhancer binding protein beta [Source:HGNC Symbol;Acc:HGNC:1834]
ENSG00000134333	13102.2	13460.7	13928.1	15878.5	15948	15804.2	13497	15876.9	-0.23433	6.64381e-22	1.86038e-20	LDHA	protein_coding	lactate dehydrogenase A [Source:HGNC Symbol;Acc:HGNC:6535]
ENSG00000055917	3249.62	3474.11	3247.88	2540.03	2514.3	2536.29	3323.87	2530.21	0.394321	7.35298e-22	2.05548e-20	PUM2	protein_coding	pumilio RNA binding family member 2 [Source:HGNC Symbol;Acc:HGNC:14958]
ENSG00000073060	4740.33	4638.48	4440.42	3670.02	3634.48	3614.29	4606.41	3639.6	0.33983	7.42611e-22	2.07241e-20	SCARB1	protein_coding	scavenger receptor class B member 1 [Source:HGNC Symbol;Acc:HGNC:1664]
ENSG00000122515	6892.08	6331.69	6440.98	5339.67	5091.48	5096.29	6554.91	5175.81	0.339877	7.96507e-22	2.21907e-20	ZMIZ2	protein_coding	zinc finger MIZ-type containing 2 [Source:HGNC Symbol;Acc:HGNC:22229]
ENSG00000100201	5463.17	5358.97	5368.53	6535.45	6677.43	6454.61	5396.89	6555.83	-0.280657	8.61349e-22	2.39568e-20	DDX17	protein_coding	DEAD-box helicase 17 [Source:HGNC Symbol;Acc:HGNC:2740]
ENSG00000198899	24801.6	25472.3	26059.9	22037	22077.6	22163.9	25444.6	22092.9	0.203803	9.9121e-22	2.75223e-20	MT-ATP6	protein_coding	mitochondrially encoded ATP synthase membrane subunit 6 [Source:HGNC Symbol;Acc:HGNC:7414]
ENSG00000196735	358.275	406.805	341.327	692.575	656.552	692.559	368.802	680.562	-0.881364	1.00578e-21	2.788e-20	HLA-DQA1	protein_coding	major histocompatibility complex, class II, DQ alpha 1 [Source:HGNC Symbol;Acc:HGNC:4942]
ENSG00000278828	80.6642	93.1131	82.1714	229.376	269.655	256.618	85.3162	251.883	-1.55658	1.01576e-21	2.81095e-20	HIST1H3H	protein_coding	histone cluster 1 H3 family member h [Source:HGNC Symbol;Acc:HGNC:4775]
ENSG00000135373	3303.04	3378.29	3441.72	4240.8	4248.4	4248.11	3374.35	4245.77	-0.331382	1.12575e-21	3.11012e-20	EHF	protein_coding	ETS homologous factor [Source:HGNC Symbol;Acc:HGNC:3246]
ENSG00000071553	7699.77	7305.31	7276.38	6131.82	6085.9	6052.68	7427.15	6090.13	0.285983	1.18083e-21	3.25685e-20	ATP6AP1	protein_coding	ATPase H+ transporting accessory protein 1 [Source:HGNC Symbol;Acc:HGNC:868]
ENSG00000140807	910.353	911.242	867.014	496.982	569.154	541.062	896.203	535.733	0.745056	1.21567e-21	3.34715e-20	NKD1	protein_coding	naked cuticle homolog 1 [Source:HGNC Symbol;Acc:HGNC:17045]
ENSG00000232810	529.032	567.718	536.221	269.384	294.169	283.413	544.324	282.322	0.94975	1.21763e-21	3.34715e-20	TNF	protein_coding	tumor necrosis factor [Source:HGNC Symbol;Acc:HGNC:11892]
ENSG00000172331	2146.51	2119	2128.03	2866.32	2751.98	2808.37	2131.18	2808.89	-0.399009	1.22403e-21	3.35918e-20	BPGM	protein_coding	bisphosphoglycerate mutase [Source:HGNC Symbol;Acc:HGNC:1093]
ENSG00000107957	768.929	720.496	800.645	422.302	425.267	459.645	763.357	435.738	0.808477	1.29012e-21	3.53466e-20	SH3PXD2A	protein_coding	SH3 and PX domains 2A [Source:HGNC Symbol;Acc:HGNC:23664]
ENSG00000116729	2181.08	2405.57	2351.37	3077.02	3144.2	3056.74	2312.67	3092.66	-0.418303	1.41944e-21	3.88255e-20	WLS	protein_coding	wntless Wnt ligand secretion mediator [Source:HGNC Symbol;Acc:HGNC:30238]
ENSG00000111057	44171.5	42536.4	43430.8	48939.9	48708.5	49402.5	43379.6	49017	-0.176391	1.44293e-21	3.94028e-20	KRT18	protein_coding	keratin 18 [Source:HGNC Symbol;Acc:HGNC:6430]
ENSG00000067225	23342.3	22715.1	23439.9	19998.4	20304.1	20372.8	23165.8	20225.1	0.195784	1.50224e-21	4.09546e-20	PKM	protein_coding	pyruvate kinase M1/2 [Source:HGNC Symbol;Acc:HGNC:9021]
ENSG00000132182	9131.82	8828.56	8851.34	7518.75	7534.36	7500.66	8937.24	7517.92	0.249312	1.50766e-21	4.10346e-20	NUP210	protein_coding	nucleoporin 210 [Source:HGNC Symbol;Acc:HGNC:30052]
ENSG00000198246	474.557	458.333	428.766	763.699	768.464	809.016	453.886	780.393	-0.781162	1.61692e-21	4.39361e-20	SLC29A3	protein_coding	solute carrier family 29 member 3 [Source:HGNC Symbol;Acc:HGNC:23096]
ENSG00000136156	3046.38	2918.15	3057.2	2357.78	2140.19	2177.64	3007.24	2225.2	0.43263	1.81346e-21	4.91957e-20	ITM2B	protein_coding	integral membrane protein 2B [Source:HGNC Symbol;Acc:HGNC:6174]
ENSG00000114631	3432.94	3277.94	3344.8	2642.27	2543.07	2557.93	3351.89	2581.09	0.375945	1.9707e-21	5.33738e-20	PODXL2	protein_coding	podocalyxin like 2 [Source:HGNC Symbol;Acc:HGNC:17936]
ENSG00000233461	127.806	128.369	149.594	24.8936	23.4483	28.8566	135.256	25.7328	2.39365	1.99702e-21	5.39979e-20	AL445524.1	antisense	novel transcript
ENSG00000166888	2591.73	2609.88	2712.71	3488.66	3567.34	3313.36	2638.11	3456.45	-0.390066	2.20449e-21	5.95104e-20	STAT6	protein_coding	signal transducer and activator of transcription 6 [Source:HGNC Symbol;Acc:HGNC:11368]
ENSG00000134057	2541.45	2555.64	2649.5	3301.07	3386.15	3322.63	2582.2	3336.61	-0.369776	2.25914e-21	6.08862e-20	CCNB1	protein_coding	cyclin B1 [Source:HGNC Symbol;Acc:HGNC:1579]
ENSG00000134909	2359.17	2344.1	2315.55	3014.79	3114.36	3013.46	2339.6	3047.53	-0.380994	2.44529e-21	6.57959e-20	ARHGAP32	protein_coding	Rho GTPase activating protein 32 [Source:HGNC Symbol;Acc:HGNC:17399]
ENSG00000130340	232.564	230.523	243.354	496.982	456.176	469.951	235.48	474.37	-1.01228	3.04442e-21	8.17836e-20	SNX9	protein_coding	sorting nexin 9 [Source:HGNC Symbol;Acc:HGNC:14973]
ENSG00000170515	4128.54	4238	4275.02	3320.62	3414.92	3197.93	4213.85	3311.16	0.347989	3.10876e-21	8.33765e-20	PA2G4	protein_coding	proliferation-associated 2G4 [Source:HGNC Symbol;Acc:HGNC:8550]
ENSG00000156052	1735.85	1710.39	1706.64	2284.87	2334.17	2312.65	1717.63	2310.57	-0.427644	3.11381e-21	8.33765e-20	GNAQ	protein_coding	G protein subunit alpha q [Source:HGNC Symbol;Acc:HGNC:4390]
ENSG00000004399	4825.19	4290.43	4179.15	3333.96	3290.22	3226.79	4431.59	3283.66	0.432004	3.77356e-21	1.00879e-19	PLXND1	protein_coding	plexin D1 [Source:HGNC Symbol;Acc:HGNC:9107]
ENSG00000101000	1330.44	1281.89	1285.25	905.059	833.48	846.117	1299.19	861.552	0.59078	4.12204e-21	1.10017e-19	PROCR	protein_coding	protein C receptor [Source:HGNC Symbol;Acc:HGNC:9452]
ENSG00000169100	7390.73	7181.46	7245.83	6111.37	5914.3	5618.8	7272.67	5881.49	0.30557	4.17436e-21	1.11233e-19	SLC25A6	protein_coding	solute carrier family 25 member 6 [Source:HGNC Symbol;Acc:HGNC:10992]
ENSG00000134339	634.838	715.976	755.345	1166.44	1140.44	1086.25	702.053	1131.04	-0.688093	4.79203e-21	1.27487e-19	SAA2	protein_coding	serum amyloid A2 [Source:HGNC Symbol;Acc:HGNC:10514]
ENSG00000157193	3186.76	3280.65	3173.08	2513.36	2502.57	2432.2	3213.5	2482.71	0.372407	4.99616e-21	1.32704e-19	LRP8	protein_coding	LDL receptor related protein 8 [Source:HGNC Symbol;Acc:HGNC:6700]
ENSG00000169047	255.611	199.786	213.856	449.862	467.9	511.174	223.085	476.312	-1.09641	5.74217e-21	1.52273e-19	IRS1	protein_coding	insulin receptor substrate 1 [Source:HGNC Symbol;Acc:HGNC:6125]
ENSG00000136159	214.755	230.523	252.835	479.201	452.978	488.501	232.704	473.56	-1.02588	6.73934e-21	1.78431e-19	NUDT15	protein_coding	nudix hydrolase 15 [Source:HGNC Symbol;Acc:HGNC:23063]
ENSG00000006459	268.182	281.147	262.316	511.207	517.994	530.756	270.549	519.986	-0.940957	6.81582e-21	1.80167e-19	KDM7A	protein_coding	lysine demethylase 7A [Source:HGNC Symbol;Acc:HGNC:22224]
ENSG00000108984	414.845	431.213	424.552	168.921	218.495	196.843	423.537	194.753	1.1261	7.28897e-21	1.92366e-19	MAP2K6	protein_coding	mitogen-activated protein kinase kinase 6 [Source:HGNC Symbol;Acc:HGNC:6846]
ENSG00000171208	749.025	781.969	725.848	438.305	441.254	447.278	752.28	442.279	0.767433	8.29719e-21	2.18625e-19	NETO2	protein_coding	neuropilin and tolloid like 2 [Source:HGNC Symbol;Acc:HGNC:14644]
ENSG00000056586	1443.58	1503.37	1388.49	939.732	1009.34	985.248	1445.14	978.107	0.565163	8.40712e-21	2.21169e-19	RC3H2	protein_coding	ring finger and CCCH-type domains 2 [Source:HGNC Symbol;Acc:HGNC:21461]
ENSG00000126267	3057.91	2924.47	3157.28	2320.44	2341.63	2190.01	3046.55	2284.03	0.414694	8.9095e-21	2.34012e-19	COX6B1	protein_coding	cytochrome c oxidase subunit 6B1 [Source:HGNC Symbol;Acc:HGNC:2280]
ENSG00000265972	5087.08	5075.11	5368.53	6571.01	6332.1	6275.28	5176.91	6392.8	-0.305154	9.20713e-21	2.41446e-19	TXNIP	protein_coding	thioredoxin interacting protein [Source:HGNC Symbol;Acc:HGNC:16952]
ENSG00000204843	1842.71	1904.75	1849.91	2492.91	2497.24	2454.87	1865.79	2481.68	-0.411047	9.23644e-21	2.41831e-19	DCTN1	protein_coding	dynactin subunit 1 [Source:HGNC Symbol;Acc:HGNC:2711]
ENSG00000231925	7202.16	6960.88	6810.75	5033.84	5644.64	5620.86	6991.26	5433.11	0.364682	1.0372e-20	2.71132e-19	TAPBP	protein_coding	TAP binding protein [Source:HGNC Symbol;Acc:HGNC:11566]
ENSG00000071539	2449.26	2451.68	2528.35	1807.45	1877.99	1881.86	2476.43	1855.77	0.41674	1.19636e-20	3.12244e-19	TRIP13	protein_coding	thyroid hormone receptor interactor 13 [Source:HGNC Symbol;Acc:HGNC:12307]
ENSG00000166508	7909.28	7741.04	7903.2	6431.43	6728.59	6370.1	7851.18	6510.04	0.270373	1.43683e-20	3.74414e-19	MCM7	protein_coding	minichromosome maintenance complex component 7 [Source:HGNC Symbol;Acc:HGNC:6950]
ENSG00000118873	697.693	701.512	736.382	1092.65	1101	1083.15	711.862	1092.27	-0.618082	1.60575e-20	4.17774e-19	RAB3GAP2	protein_coding	RAB3 GTPase activating non-catalytic protein subunit 2 [Source:HGNC Symbol;Acc:HGNC:17168]
ENSG00000042753	2175.84	2335.06	2341.89	1711.43	1659.5	1635.55	2284.26	1668.83	0.452665	1.62965e-20	4.23324e-19	AP2S1	protein_coding	adaptor related protein complex 2 subunit sigma 1 [Source:HGNC Symbol;Acc:HGNC:565]
ENSG00000133704	826.546	875.082	894.404	1247.35	1319.5	1340.8	865.344	1302.55	-0.588834	1.66844e-20	4.32722e-19	IPO8	protein_coding	importin 8 [Source:HGNC Symbol;Acc:HGNC:9853]
ENSG00000100592	885.211	967.291	1002.91	1399.37	1426.08	1422.22	951.805	1415.89	-0.572359	1.67517e-20	4.33786e-19	DAAM1	protein_coding	dishevelled associated activator of morphogenesis 1 [Source:HGNC Symbol;Acc:HGNC:18142]
ENSG00000167114	992.065	960.059	914.42	609.003	571.285	607.02	955.515	595.77	0.680769	1.89012e-20	4.8868e-19	SLC27A4	protein_coding	solute carrier family 27 member 4 [Source:HGNC Symbol;Acc:HGNC:10998]
ENSG00000007237	1234.06	1230.36	1222.04	792.149	864.389	775.006	1228.82	810.515	0.601404	1.98702e-20	5.1293e-19	GAS7	protein_coding	growth arrest specific 7 [Source:HGNC Symbol;Acc:HGNC:4169]
ENSG00000111206	911.401	838.922	780.628	1252.68	1316.3	1323.28	843.65	1297.42	-0.620325	2.15003e-20	5.54145e-19	FOXM1	protein_coding	forkhead box M1 [Source:HGNC Symbol;Acc:HGNC:3818]
ENSG00000063241	1133.49	1017.01	1135.65	724.581	668.276	666.794	1095.38	686.55	0.671136	2.23216e-20	5.74417e-19	ISOC2	protein_coding	isochorismatase domain containing 2 [Source:HGNC Symbol;Acc:HGNC:26278]
ENSG00000159387	467.224	409.517	479.333	812.597	773.793	754.395	452.025	780.262	-0.79098	2.29348e-20	5.89278e-19	IRX6	protein_coding	iroquois homeobox 6 [Source:HGNC Symbol;Acc:HGNC:14675]
ENSG00000167508	1545.19	1508.79	1483.3	1062.42	1016.8	1072.85	1512.43	1050.69	0.524991	2.54785e-20	6.53619e-19	MVD	protein_coding	mevalonate diphosphate decarboxylase [Source:HGNC Symbol;Acc:HGNC:7529]
ENSG00000151276	756.358	824.457	851.212	1312.25	1193.73	1240.83	810.676	1248.94	-0.624236	2.66456e-20	6.825e-19	MAGI1	protein_coding	membrane associated guanylate kinase, WW and PDZ domain containing 1 [Source:HGNC Symbol;Acc:HGNC:946]
ENSG00000136167	2072.13	2057.53	2115.39	1504.28	1556.11	1537.65	2081.68	1532.68	0.442009	2.79343e-20	7.144e-19	LCP1	protein_coding	lymphocyte cytosolic protein 1 [Source:HGNC Symbol;Acc:HGNC:6528]
ENSG00000101447	2569.73	2411	2505.17	3280.62	3275.3	3159.8	2495.3	3238.57	-0.377097	2.99629e-20	7.65096e-19	FAM83D	protein_coding	family with sequence similarity 83 member D [Source:HGNC Symbol;Acc:HGNC:16122]
ENSG00000166881	927.115	934.747	917.581	1358.48	1377.05	1324.31	926.481	1353.28	-0.546361	3.02186e-20	7.70436e-19	NEMP1	protein_coding	nuclear envelope integral membrane protein 1 [Source:HGNC Symbol;Acc:HGNC:29001]
ENSG00000163346	964.828	892.258	992.378	1424.27	1422.88	1367.6	949.821	1404.92	-0.566558	3.25792e-20	8.29339e-19	PBXIP1	protein_coding	PBX homeobox interacting protein 1 [Source:HGNC Symbol;Acc:HGNC:21199]
ENSG00000108774	2057.46	2099.11	2082.73	1590.52	1441	1452.11	2079.77	1494.54	0.475207	3.33353e-20	8.47281e-19	RAB5C	protein_coding	RAB5C, member RAS oncogene family [Source:HGNC Symbol;Acc:HGNC:9785]
ENSG00000205937	6765.32	6546.84	6491.54	5504.15	5396.3	5485.85	6601.23	5462.1	0.272944	3.587e-20	9.10305e-19	RNPS1	protein_coding	RNA binding protein with serine rich domain 1 [Source:HGNC Symbol;Acc:HGNC:10080]
ENSG00000171603	8307.37	8265.37	8011.71	6716.82	6974.8	6885.4	8194.82	6859	0.25729	4.78484e-20	1.21243e-18	CLSTN1	protein_coding	calsyntenin 1 [Source:HGNC Symbol;Acc:HGNC:17447]
ENSG00000134243	1139.77	1092.95	1082.98	1509.62	1647.77	1654.1	1105.23	1603.83	-0.536208	4.90035e-20	1.2398e-18	SORT1	protein_coding	sortilin 1 [Source:HGNC Symbol;Acc:HGNC:11186]
ENSG00000112308	4130.64	4052.68	4060.11	4904.03	5068.03	5175.64	4081.14	5049.23	-0.306712	5.02843e-20	1.27025e-18	C6orf62	protein_coding	chromosome 6 open reading frame 62 [Source:HGNC Symbol;Acc:HGNC:20998]
ENSG00000162645	315.324	347.14	324.472	590.333	682.132	579.194	328.978	617.22	-0.905032	5.04638e-20	1.27284e-18	GBP2	protein_coding	guanylate binding protein 2 [Source:HGNC Symbol;Acc:HGNC:4183]
ENSG00000213965	367.703	353.468	351.862	671.237	643.762	599.806	357.678	638.268	-0.836831	5.63959e-20	1.4203e-18	NUDT19	protein_coding	nudix hydrolase 19 [Source:HGNC Symbol;Acc:HGNC:32036]
ENSG00000167608	342.561	362.508	348.702	632.119	690.659	592.591	351.257	638.456	-0.860582	5.6541e-20	1.42179e-18	TMC4	protein_coding	transmembrane channel like 4 [Source:HGNC Symbol;Acc:HGNC:22998]
ENSG00000007202	7290.16	7525.89	7383.84	6181.61	6211.66	6243.34	7399.96	6212.2	0.252811	5.66665e-20	1.42278e-18	KIAA0100	protein_coding	KIAA0100 [Source:HGNC Symbol;Acc:HGNC:28960]
ENSG00000163520	3858.26	3708.25	3752.49	3055.69	2712.54	2815.58	3773	2861.27	0.397435	5.79274e-20	1.45223e-18	FBLN2	protein_coding	fibulin 2 [Source:HGNC Symbol;Acc:HGNC:3601]
ENSG00000156709	2491.16	2552.92	2519.92	1904.36	1935.55	1910.72	2521.34	1916.88	0.395929	6.0769e-20	1.52116e-18	AIFM1	protein_coding	apoptosis inducing factor mitochondria associated 1 [Source:HGNC Symbol;Acc:HGNC:8768]
ENSG00000070404	742.739	653.599	667.906	398.297	386.897	387.503	688.082	390.899	0.814215	6.81632e-20	1.70334e-18	FSTL3	protein_coding	follistatin like 3 [Source:HGNC Symbol;Acc:HGNC:3973]
ENSG00000160551	4476.34	4474.85	4349.82	5400.13	5347.27	5480.7	4433.67	5409.37	-0.28676	6.82534e-20	1.70334e-18	TAOK1	protein_coding	TAO kinase 1 [Source:HGNC Symbol;Acc:HGNC:29259]
ENSG00000183955	521.698	484.549	497.242	861.495	815.361	797.679	501.163	824.845	-0.72075	7.98808e-20	1.99051e-18	KMT5A	protein_coding	lysine methyltransferase 5A [Source:HGNC Symbol;Acc:HGNC:29489]
ENSG00000134247	1158.63	1123.68	1104.05	1588.74	1564.64	1661.32	1128.79	1604.9	-0.507721	8.34689e-20	2.07679e-18	PTGFRN	protein_coding	prostaglandin F2 receptor inhibitor [Source:HGNC Symbol;Acc:HGNC:9601]
ENSG00000113739	1141.87	1221.32	1237.84	760.143	815.361	801.802	1200.34	792.435	0.600657	8.59281e-20	2.13476e-18	STC2	protein_coding	stanniocalcin 2 [Source:HGNC Symbol;Acc:HGNC:11374]
ENSG00000145494	3665.51	3631.41	3993.74	2963.22	2650.72	2540.41	3763.55	2718.12	0.467866	9.06642e-20	2.24904e-18	NDUFS6	protein_coding	NADH:ubiquinone oxidoreductase subunit S6 [Source:HGNC Symbol;Acc:HGNC:7713]
ENSG00000095739	897.782	847.962	890.19	1299.8	1325.89	1261.45	878.645	1295.71	-0.561316	9.39328e-20	2.32663e-18	BAMBI	protein_coding	BMP and activin membrane bound inhibitor [Source:HGNC Symbol;Acc:HGNC:30251]
ENSG00000112096	13808.2	14104.4	14680.2	11213.7	12162.2	11845.6	14197.6	11740.5	0.274567	9.89434e-20	2.44707e-18	SOD2	protein_coding	superoxide dismutase 2 [Source:HGNC Symbol;Acc:HGNC:11180]
ENSG00000183291	2903.91	2841.3	2853.88	2192.41	2170.03	2263.18	2866.36	2208.54	0.376029	1.03318e-19	2.55145e-18	SELENOF	protein_coding	selenoprotein F [Source:HGNC Symbol;Acc:HGNC:17705]
ENSG00000165410	557.316	615.631	584.681	924.618	948.59	923.412	585.876	932.207	-0.668356	1.17766e-19	2.90389e-18	CFL2	protein_coding	cofilin 2 [Source:HGNC Symbol;Acc:HGNC:1875]
ENSG00000127585	380.274	368.836	388.734	168.032	195.047	158.711	379.281	173.93	1.12619	1.1862e-19	2.92061e-18	FBXL16	protein_coding	F-box and leucine rich repeat protein 16 [Source:HGNC Symbol;Acc:HGNC:14150]
ENSG00000143761	8781.92	8558.27	9011.47	7418.28	7378.75	7386.26	8783.89	7394.43	0.247954	1.19813e-19	2.94557e-18	ARF1	protein_coding	ADP ribosylation factor 1 [Source:HGNC Symbol;Acc:HGNC:652]
ENSG00000164919	3043.24	3010.35	2930.78	2361.33	2312.85	2185.89	2994.79	2286.69	0.388643	1.36389e-19	3.34811e-18	COX6C	protein_coding	cytochrome c oxidase subunit 6C [Source:HGNC Symbol;Acc:HGNC:2285]
ENSG00000171303	1138.73	1027.86	1044	670.348	703.449	690.498	1070.2	688.098	0.637249	1.47928e-19	3.62599e-18	KCNK3	protein_coding	potassium two pore domain channel subfamily K member 3 [Source:HGNC Symbol;Acc:HGNC:6278]
ENSG00000135111	1697.09	1579.31	1661.34	1125.55	1090.35	1209.92	1645.91	1141.94	0.526744	1.50639e-19	3.68697e-18	TBX3	protein_coding	T-box 3 [Source:HGNC Symbol;Acc:HGNC:11602]
ENSG00000055483	4480.53	4414.28	4498.36	3578.45	3694.17	3520.51	4464.39	3597.71	0.311422	1.60959e-19	3.93279e-18	USP36	protein_coding	ubiquitin specific peptidase 36 [Source:HGNC Symbol;Acc:HGNC:20062]
ENSG00000130829	1138.73	1020.63	1115.64	713.023	708.778	688.437	1091.66	703.412	0.632483	1.61159e-19	3.93279e-18	DUSP9	protein_coding	dual specificity phosphatase 9 [Source:HGNC Symbol;Acc:HGNC:3076]
ENSG00000091490	3866.64	3899.9	4044.31	3109.03	3082.38	3190.72	3936.95	3127.38	0.331983	1.68848e-19	4.11436e-18	SEL1L3	protein_coding	SEL1L family member 3 [Source:HGNC Symbol;Acc:HGNC:29108]
ENSG00000166710	23034.3	23284.6	24023.6	20598.5	19872.4	20569.6	23447.5	20346.9	0.2044	1.78849e-19	4.35164e-18	B2M	protein_coding	beta-2-microglobulin [Source:HGNC Symbol;Acc:HGNC:914]
ENSG00000018408	1362.91	1347.88	1290.51	1827.9	1834.3	1848.89	1333.77	1837.03	-0.461453	1.88812e-19	4.58731e-18	WWTR1	protein_coding	WW domain containing transcription regulator 1 [Source:HGNC Symbol;Acc:HGNC:24042]
ENSG00000182154	1218.34	1181.54	1212.56	844.603	789.781	740.997	1204.15	791.794	0.60272	1.89791e-19	4.60431e-18	MRPL41	protein_coding	mitochondrial ribosomal protein L41 [Source:HGNC Symbol;Acc:HGNC:14492]
ENSG00000010292	2625.25	2668.64	2799.1	3360.63	3535.36	3558.64	2697.66	3484.88	-0.368985	1.97484e-19	4.78391e-18	NCAPD2	protein_coding	non-SMC condensin I complex subunit D2 [Source:HGNC Symbol;Acc:HGNC:24305]
ENSG00000168906	5646.5	5567.8	5699.33	6819.06	6644.39	6755.54	5637.87	6739.66	-0.25806	1.9964e-19	4.82907e-18	MAT2A	protein_coding	methionine adenosyltransferase 2A [Source:HGNC Symbol;Acc:HGNC:6904]
ENSG00000111859	2590.68	2591.8	2652.66	3301.07	3424.52	3276.26	2611.71	3333.95	-0.352107	2.0377e-19	4.92177e-18	NEDD9	protein_coding	neural precursor cell expressed, developmentally down-regulated 9 [Source:HGNC Symbol;Acc:HGNC:7733]
ENSG00000135164	838.07	826.265	867.014	1238.46	1225.71	1264.54	843.783	1242.9	-0.559372	2.12451e-19	5.12394e-18	DMTF1	protein_coding	cyclin D binding myb like transcription factor 1 [Source:HGNC Symbol;Acc:HGNC:14603]
ENSG00000086300	331.038	341.716	329.739	606.336	571.285	610.111	334.164	595.911	-0.834403	2.14601e-19	5.16825e-18	SNX10	protein_coding	sorting nexin 10 [Source:HGNC Symbol;Acc:HGNC:14974]
ENSG00000124151	6362	6453.73	6287.17	7456.51	7581.26	7668.65	6367.63	7568.81	-0.248776	2.28435e-19	5.49341e-18	NCOA3	protein_coding	nuclear receptor coactivator 3 [Source:HGNC Symbol;Acc:HGNC:7670]
ENSG00000205744	1123.01	1208.66	1210.45	785.037	791.913	785.312	1180.71	787.42	0.585037	2.49821e-19	5.99897e-18	DENND1C	protein_coding	DENN domain containing 1C [Source:HGNC Symbol;Acc:HGNC:26225]
ENSG00000185825	5046.23	5204.39	5051.44	4183.9	4221.76	4097.64	5100.68	4167.77	0.291784	2.50493e-19	6.00637e-18	BCAP31	protein_coding	B cell receptor associated protein 31 [Source:HGNC Symbol;Acc:HGNC:16695]
ENSG00000077150	4262.63	4118.67	4244.47	3367.74	3267.84	3445.27	4208.59	3360.29	0.32417	2.52796e-19	6.05282e-18	NFKB2	protein_coding	nuclear factor kappa B subunit 2 [Source:HGNC Symbol;Acc:HGNC:7795]
ENSG00000163428	1370.24	1403.93	1365.31	1899.91	1853.48	1902.48	1379.83	1885.29	-0.450074	2.54179e-19	6.07711e-18	LRRC58	protein_coding	leucine rich repeat containing 58 [Source:HGNC Symbol;Acc:HGNC:26968]
ENSG00000173281	148.757	143.738	136.952	325.395	336.803	313.3	143.149	325.166	-1.1833	2.61265e-19	6.2375e-18	PPP1R3B	protein_coding	protein phosphatase 1 regulatory subunit 3B [Source:HGNC Symbol;Acc:HGNC:14942]
ENSG00000165997	653.694	679.816	585.735	1069.53	977.367	1019.26	639.748	1022.05	-0.675259	2.9518e-19	7.03703e-18	ARL5B	protein_coding	ADP ribosylation factor like GTPase 5B [Source:HGNC Symbol;Acc:HGNC:23052]
ENSG00000257335	144.567	147.354	155.915	338.73	336.803	323.606	149.279	333.046	-1.15851	3.0933e-19	7.36374e-18	MGAM	protein_coding	maltase-glucoamylase [Source:HGNC Symbol;Acc:HGNC:7043]
ENSG00000145779	201.137	250.411	211.749	460.531	441.254	451.4	221.099	451.062	-1.02509	3.22327e-19	7.66211e-18	TNFAIP8	protein_coding	TNF alpha induced protein 8 [Source:HGNC Symbol;Acc:HGNC:17260]
ENSG00000107679	702.931	771.121	731.115	426.747	448.715	438.002	735.056	437.821	0.749435	3.46887e-19	8.23408e-18	PLEKHA1	protein_coding	pleckstrin homology domain containing A1 [Source:HGNC Symbol;Acc:HGNC:14335]
ENSG00000075618	7794.05	7066.65	7265.85	6014.46	5955.86	5927.97	7375.52	5966.1	0.305367	3.53781e-19	8.38568e-18	FSCN1	protein_coding	fascin actin-bundling protein 1 [Source:HGNC Symbol;Acc:HGNC:11148]
ENSG00000170381	163.424	208.826	205.429	390.296	426.332	423.574	192.56	413.401	-1.09867	3.60581e-19	8.53462e-18	SEMA3E	protein_coding	semaphorin 3E [Source:HGNC Symbol;Acc:HGNC:10727]
ENSG00000163162	2546.68	2564.68	2486.21	1910.58	1892.92	1979.77	2532.52	1927.76	0.394047	3.9525e-19	9.34181e-18	RNF149	protein_coding	ring finger protein 149 [Source:HGNC Symbol;Acc:HGNC:23137]
ENSG00000139163	521.698	521.614	507.777	840.158	813.229	834.781	517.03	829.389	-0.681901	4.2046e-19	9.92346e-18	ETNK1	protein_coding	ethanolamine kinase 1 [Source:HGNC Symbol;Acc:HGNC:24649]
ENSG00000115183	1183.77	1155.33	1314.74	1689.21	1790.6	1762.32	1217.95	1747.37	-0.521286	4.71989e-19	1.11237e-17	TANC1	protein_coding	tetratricopeptide repeat, ankyrin repeat and coiled-coil containing 1 [Source:HGNC Symbol;Acc:HGNC:29364]
ENSG00000072422	2111.94	2250.08	2260.77	2861.87	2899.06	2864.02	2207.6	2874.98	-0.380527	4.73126e-19	1.11346e-17	RHOBTB1	protein_coding	Rho related BTB domain containing 1 [Source:HGNC Symbol;Acc:HGNC:18738]
ENSG00000099942	1399.58	1446.42	1460.12	1902.58	2107.15	1969.46	1435.37	1993.06	-0.472337	5.33177e-19	1.253e-17	CRKL	protein_coding	CRK like proto-oncogene, adaptor protein [Source:HGNC Symbol;Acc:HGNC:2363]
ENSG00000121274	1120.92	1167.98	1175.68	812.597	726.897	687.406	1154.86	742.3	0.635449	5.88871e-19	1.38192e-17	TENT4B	protein_coding	terminal nucleotidyltransferase 4B [Source:HGNC Symbol;Acc:HGNC:30758]
ENSG00000111266	1227.77	1227.65	1145.13	1671.43	1704.26	1662.35	1200.18	1679.35	-0.483836	6.48052e-19	1.51865e-17	DUSP16	protein_coding	dual specificity phosphatase 16 [Source:HGNC Symbol;Acc:HGNC:17909]
ENSG00000067704	5152.03	5366.2	5616.1	4254.13	4097.05	4419.19	5378.11	4256.79	0.337155	6.8195e-19	1.59582e-17	IARS2	protein_coding	isoleucyl-tRNA synthetase 2, mitochondrial [Source:HGNC Symbol;Acc:HGNC:29685]
ENSG00000135925	2396.88	2166.91	2195.45	1683.87	1638.18	1611.85	2253.08	1644.63	0.452954	6.8891e-19	1.60983e-17	WNT10A	protein_coding	Wnt family member 10A [Source:HGNC Symbol;Acc:HGNC:13829]
ENSG00000135047	1873.09	1875.82	1995.29	1449.16	1291.79	1330.5	1914.73	1357.15	0.494461	7.37298e-19	1.72047e-17	CTSL	protein_coding	cathepsin L [Source:HGNC Symbol;Acc:HGNC:2537]
ENSG00000125912	3438.18	3184.83	3242.61	2564.93	2528.15	2561.03	3288.54	2551.37	0.365458	7.53653e-19	1.75615e-17	NCLN	protein_coding	nicalin [Source:HGNC Symbol;Acc:HGNC:26923]
ENSG00000178913	3342.85	3284.27	3332.16	4280.81	4194.05	4006.95	3319.76	4160.6	-0.326415	7.71333e-19	1.79482e-17	TAF7	protein_coding	TATA-box binding protein associated factor 7 [Source:HGNC Symbol;Acc:HGNC:11541]
ENSG00000156471	433.701	420.365	416.124	700.576	751.411	687.406	423.397	713.131	-0.75172	7.8275e-19	1.81882e-17	PTDSS1	protein_coding	phosphatidylserine synthase 1 [Source:HGNC Symbol;Acc:HGNC:9587]
ENSG00000215301	11330.7	11936.6	11820	9812.51	9918.62	10125.6	11695.8	9952.24	0.233317	8.52854e-19	1.97893e-17	DDX3X	protein_coding	DEAD-box helicase 3 X-linked [Source:HGNC Symbol;Acc:HGNC:2745]
ENSG00000158373	255.611	223.291	200.161	475.645	462.571	434.911	226.354	457.709	-1.01677	8.85323e-19	2.05139e-17	HIST1H2BD	protein_coding	histone cluster 1 H2B family member d [Source:HGNC Symbol;Acc:HGNC:4747]
ENSG00000127483	2216.69	2222.96	2357.69	2890.32	2953.42	2960.9	2265.78	2934.88	-0.373448	8.99303e-19	2.08087e-17	HP1BP3	protein_coding	heterochromatin protein 1 binding protein 3 [Source:HGNC Symbol;Acc:HGNC:24973]
ENSG00000100364	2319.36	2256.41	2276.57	1742.55	1736.24	1705.63	2284.11	1728.14	0.401966	9.35548e-19	2.1617e-17	KIAA0930	protein_coding	KIAA0930 [Source:HGNC Symbol;Acc:HGNC:1314]
ENSG00000170561	2598.02	2490.55	2567.33	3337.52	3240.13	3188.66	2551.96	3255.43	-0.352307	1.19059e-18	2.74717e-17	IRX2	protein_coding	iroquois homeobox 2 [Source:HGNC Symbol;Acc:HGNC:14359]
ENSG00000172830	1717	1590.15	1627.63	2249.31	2279.81	2142.6	1644.93	2223.91	-0.435939	1.21244e-18	2.79369e-17	SSH3	protein_coding	slingshot protein phosphatase 3 [Source:HGNC Symbol;Acc:HGNC:30581]
ENSG00000285894	392.845	394.148	391.894	168.032	201.442	197.874	392.963	189.116	1.05919	1.21465e-18	2.79488e-17	AL136372.2	lincRNA	novel transcript
ENSG00000133639	1447.77	1385.85	1463.28	1942.59	1939.81	1935.45	1432.3	1939.29	-0.438097	1.37539e-18	3.16033e-17	BTG1	protein_coding	BTG anti-proliferation factor 1 [Source:HGNC Symbol;Acc:HGNC:1130]
ENSG00000167553	7472.44	7328.81	7408.07	6207.39	6372.6	6141.31	7403.11	6240.43	0.246511	1.38474e-18	3.17741e-17	TUBA1C	protein_coding	tubulin alpha 1c [Source:HGNC Symbol;Acc:HGNC:20768]
ENSG00000101412	1618.52	1469.02	1498.05	1020.64	1078.62	1084.18	1528.53	1061.15	0.526818	1.39177e-18	3.18911e-17	E2F1	protein_coding	E2F transcription factor 1 [Source:HGNC Symbol;Acc:HGNC:3113]
ENSG00000135480	18209.2	18205	17984	16003.9	16175.1	15741.3	18132.7	15973.4	0.18299	1.39702e-18	3.19671e-17	KRT7	protein_coding	keratin 7 [Source:HGNC Symbol;Acc:HGNC:6445]
ENSG00000156381	1006.73	885.93	917.581	598.335	597.931	558.582	936.747	584.949	0.677882	1.45897e-18	3.33384e-17	ANKRD9	protein_coding	ankyrin repeat domain 9 [Source:HGNC Symbol;Acc:HGNC:20096]
ENSG00000146676	3432.94	3382.81	3239.45	4097.66	4207.9	4294.48	3351.73	4200.01	-0.324839	1.46505e-18	3.34311e-17	PURB	protein_coding	purine rich element binding protein B [Source:HGNC Symbol;Acc:HGNC:9702]
ENSG00000173153	3266.38	3076.35	3116.19	2498.25	2383.2	2459	3152.97	2446.81	0.364768	1.60997e-18	3.66873e-17	ESRRA	protein_coding	estrogen related receptor alpha [Source:HGNC Symbol;Acc:HGNC:3471]
ENSG00000134109	922.924	894.066	915.474	1313.14	1307.77	1306.79	910.821	1309.23	-0.524081	1.65623e-18	3.76895e-17	EDEM1	protein_coding	ER degradation enhancing alpha-mannosidase like protein 1 [Source:HGNC Symbol;Acc:HGNC:18967]
ENSG00000116260	4762.33	4519.15	4657.43	5609.94	5583.89	5764.11	4646.3	5652.65	-0.283303	1.68062e-18	3.81918e-17	QSOX1	protein_coding	quiescin sulfhydryl oxidase 1 [Source:HGNC Symbol;Acc:HGNC:9756]
ENSG00000093010	2203.08	2110.86	2165.95	1650.09	1616.87	1581.96	2159.96	1616.31	0.417305	1.76446e-18	4.00421e-17	COMT	protein_coding	catechol-O-methyltransferase [Source:HGNC Symbol;Acc:HGNC:2228]
ENSG00000172466	1571.38	1694.12	1629.73	2161.3	2191.35	2209.59	1631.74	2187.41	-0.421621	1.8679e-18	4.23314e-17	ZNF24	protein_coding	zinc finger protein 24 [Source:HGNC Symbol;Acc:HGNC:13032]
ENSG00000152818	649.504	790.105	676.334	1098.87	1115.93	1132.62	705.314	1115.81	-0.658713	1.91165e-18	4.32634e-17	UTRN	protein_coding	utrophin [Source:HGNC Symbol;Acc:HGNC:12635]
ENSG00000108733	43.9987	28.9283	35.8183	150.25	142.821	142.222	36.2484	145.098	-2.00994	2.06353e-18	4.66016e-17	PEX12	protein_coding	peroxisomal biogenesis factor 12 [Source:HGNC Symbol;Acc:HGNC:8854]
ENSG00000067064	1431	1574.79	1464.34	1011.75	1076.49	1012.04	1490.04	1033.43	0.529746	2.06479e-18	4.66016e-17	IDI1	protein_coding	isopentenyl-diphosphate delta isomerase 1 [Source:HGNC Symbol;Acc:HGNC:5387]
ENSG00000173726	3463.32	3569.94	3581.83	2876.1	2772.23	2775.39	3538.36	2807.9	0.333129	2.25906e-18	5.09168e-17	TOMM20	protein_coding	translocase of outer mitochondrial membrane 20 [Source:HGNC Symbol;Acc:HGNC:20947]
ENSG00000101160	2777.15	2568.29	2583.13	1996.82	1925.96	2047.79	2642.86	1990.19	0.408483	2.33816e-18	5.26277e-17	CTSZ	protein_coding	cathepsin Z [Source:HGNC Symbol;Acc:HGNC:2547]
ENSG00000145012	1304.25	1404.83	1387.43	961.959	945.392	935.779	1365.5	947.71	0.527088	2.56693e-18	5.76982e-17	LPP	protein_coding	LIM domain containing preferred translocation partner in lipoma [Source:HGNC Symbol;Acc:HGNC:6679]
ENSG00000136816	933.4	929.323	992.378	602.78	633.104	608.05	951.7	614.645	0.630961	2.66262e-18	5.97679e-17	TOR1B	protein_coding	torsin family 1 member B [Source:HGNC Symbol;Acc:HGNC:11995]
ENSG00000113407	5000.13	5030.82	5081.99	4207.01	4137.56	4135.77	5037.65	4160.11	0.27581	2.80597e-18	6.29003e-17	TARS	protein_coding	threonyl-tRNA synthetase [Source:HGNC Symbol;Acc:HGNC:11572]
ENSG00000126878	3317.71	3270.71	3327.94	2600.49	2623.01	2655.84	3305.45	2626.45	0.331744	2.87989e-18	6.44697e-17	AIF1L	protein_coding	allograft inflammatory factor 1 like [Source:HGNC Symbol;Acc:HGNC:28904]
ENSG00000104687	2492.21	2461.62	2611.58	1867.02	1966.46	1913.81	2521.8	1915.76	0.396786	3.2024e-18	7.15925e-17	GSR	protein_coding	glutathione-disulfide reductase [Source:HGNC Symbol;Acc:HGNC:4623]
ENSG00000184787	2904.96	2840.4	2828.59	2251.98	2213.73	2235.36	2857.98	2233.69	0.35519	3.31604e-18	7.40328e-17	UBE2G2	protein_coding	ubiquitin conjugating enzyme E2 G2 [Source:HGNC Symbol;Acc:HGNC:12483]
ENSG00000198794	839.117	866.946	894.404	562.773	557.43	522.511	866.823	547.571	0.661999	3.51191e-18	7.83e-17	SCAMP5	protein_coding	secretory carrier membrane protein 5 [Source:HGNC Symbol;Acc:HGNC:30386]
ENSG00000150961	435.796	442.061	442.461	751.252	681.066	839.934	440.106	757.417	-0.7834	3.8576e-18	8.58913e-17	SEC24D	protein_coding	SEC24 homolog D, COPII coat complex component [Source:HGNC Symbol;Acc:HGNC:10706]
ENSG00000126524	1435.19	1549.47	1544.4	1998.6	2060.25	2086.95	1509.69	2048.6	-0.439278	3.9863e-18	8.86376e-17	SBDS	protein_coding	SBDS, ribosome maturation factor [Source:HGNC Symbol;Acc:HGNC:19440]
ENSG00000196586	2293.17	2327.83	2408.25	2939.22	3032.29	3028.91	2343.08	3000.14	-0.35635	4.16059e-18	9.23885e-17	MYO6	protein_coding	myosin VI [Source:HGNC Symbol;Acc:HGNC:7605]
ENSG00000274180	68.0932	65.0887	71.6366	208.039	185.455	205.088	68.2728	199.527	-1.55015	4.27017e-18	9.46946e-17	NATD1	protein_coding	N-acetyltransferase domain containing 1 [Source:HGNC Symbol;Acc:HGNC:30770]
ENSG00000196839	904.068	883.218	939.704	595.668	586.207	570.949	908.997	584.275	0.636453	4.31861e-18	9.56404e-17	ADA	protein_coding	adenosine deaminase [Source:HGNC Symbol;Acc:HGNC:186]
ENSG00000183207	3116.57	3190.25	3167.81	2472.46	2556.93	2430.14	3158.21	2486.51	0.345476	4.67983e-18	1.03501e-16	RUVBL2	protein_coding	RuvB like AAA ATPase 2 [Source:HGNC Symbol;Acc:HGNC:10475]
ENSG00000099219	7941.76	8148.75	7975.9	9197.29	9546.65	9463.94	8022.13	9402.63	-0.228424	4.86632e-18	1.07482e-16	ERMP1	protein_coding	endoplasmic reticulum metallopeptidase 1 [Source:HGNC Symbol;Acc:HGNC:23703]
ENSG00000133816	2453.45	2626.15	2503.07	1896.36	1841.76	1983.89	2527.56	1907.34	0.406844	5.18524e-18	1.14373e-16	MICAL2	protein_coding	microtubule associated monooxygenase, calponin and LIM domain containing 2 [Source:HGNC Symbol;Acc:HGNC:24693]
ENSG00000172366	1711.76	1763.72	1631.84	1269.57	1169.22	1203.73	1702.44	1214.17	0.487045	5.20199e-18	1.1459e-16	MCRIP2	protein_coding	MAPK regulated corepressor interacting protein 2 [Source:HGNC Symbol;Acc:HGNC:14142]
ENSG00000187134	438.939	484.549	439.301	751.252	748.213	738.936	454.263	746.134	-0.714068	5.32539e-18	1.17151e-16	AKR1C1	protein_coding	aldo-keto reductase family 1 member C1 [Source:HGNC Symbol;Acc:HGNC:384]
ENSG00000136436	201.137	223.291	198.054	434.748	379.436	467.89	207.494	427.358	-1.04089	5.41394e-18	1.18941e-16	CALCOCO2	protein_coding	calcium binding and coiled-coil domain 2 [Source:HGNC Symbol;Acc:HGNC:29912]
ENSG00000119318	4239.59	4232.58	4269.75	5090.74	5153.29	5113.81	4247.31	5119.28	-0.269334	5.4687e-18	1.19985e-16	RAD23B	protein_coding	RAD23 homolog B, nucleotide excision repair protein [Source:HGNC Symbol;Acc:HGNC:9813]
ENSG00000185963	497.604	438.445	461.424	836.602	753.543	740.997	465.824	777.047	-0.74128	6.22883e-18	1.36481e-16	BICD2	protein_coding	BICD cargo adaptor 2 [Source:HGNC Symbol;Acc:HGNC:17208]
ENSG00000163694	2726.87	2706.61	2730.62	2106.17	2112.48	2151.88	2721.37	2123.51	0.357936	6.35972e-18	1.39164e-16	RBM47	protein_coding	RNA binding motif protein 47 [Source:HGNC Symbol;Acc:HGNC:30358]
ENSG00000198911	3906.45	3816.73	3783.05	3041.46	3164.45	3017.58	3835.41	3074.5	0.319339	6.6023e-18	1.44281e-16	SREBF2	protein_coding	sterol regulatory element binding transcription factor 2 [Source:HGNC Symbol;Acc:HGNC:11290]
ENSG00000079257	2328.79	2357.66	2421.95	3073.47	2935.3	3088.69	2369.47	3032.49	-0.356481	6.94034e-18	1.51468e-16	LXN	protein_coding	latexin [Source:HGNC Symbol;Acc:HGNC:13347]
ENSG00000153815	1373.39	1319.85	1291.57	1805.67	1880.13	1772.62	1328.27	1819.47	-0.453795	7.42894e-18	1.61918e-16	CMIP	protein_coding	c-Maf inducing protein [Source:HGNC Symbol;Acc:HGNC:24319]
ENSG00000127561	1527.38	1346.98	1362.15	945.956	946.458	992.462	1412.17	961.625	0.55387	7.56603e-18	1.64688e-16	SYNGR3	protein_coding	synaptogyrin 3 [Source:HGNC Symbol;Acc:HGNC:11501]
ENSG00000138434	1697.09	1598.29	1619.2	2123.96	2190.28	2271.43	1638.19	2195.22	-0.422217	7.69581e-18	1.67293e-16	ITPRID2	protein_coding	ITPR interacting domain containing 2 [Source:HGNC Symbol;Acc:HGNC:11319]
ENSG00000020181	148.757	160.01	145.38	45.3419	41.5674	39.1626	151.382	42.0239	1.84673	7.78692e-18	1.69051e-16	ADGRA2	protein_coding	adhesion G protein-coupled receptor A2 [Source:HGNC Symbol;Acc:HGNC:17849]
ENSG00000176340	1326.25	1347.88	1326.33	865.941	966.709	933.718	1333.49	922.122	0.534248	8.64754e-18	1.87488e-16	COX8A	protein_coding	cytochrome c oxidase subunit 8A [Source:HGNC Symbol;Acc:HGNC:2294]
ENSG00000130312	1091.59	1088.43	1087.19	775.257	677.869	642.06	1089.07	698.395	0.638221	8.85697e-18	1.91777e-16	MRPL34	protein_coding	mitochondrial ribosomal protein L34 [Source:HGNC Symbol;Acc:HGNC:14488]
ENSG00000104341	9224.01	9164.86	9083.1	7855.7	7991.6	7746.97	9157.32	7864.76	0.219634	9.14596e-18	1.97775e-16	LAPTM4B	protein_coding	lysosomal protein transmembrane 4 beta [Source:HGNC Symbol;Acc:HGNC:13646]
ENSG00000164062	3266.38	3150.48	3347.96	2620.94	2488.72	2531.14	3254.94	2546.93	0.352517	1.01175e-17	2.18498e-16	APEH	protein_coding	acylaminoacyl-peptide hydrolase [Source:HGNC Symbol;Acc:HGNC:586]
ENSG00000136026	782.548	772.929	791.163	1133.55	1171.35	1130.56	782.213	1145.15	-0.549914	1.03604e-17	2.23453e-16	CKAP4	protein_coding	cytoskeleton associated protein 4 [Source:HGNC Symbol;Acc:HGNC:16991]
ENSG00000246705	1591.29	1614.56	1607.61	2335.55	2117.81	2096.23	1604.49	2183.19	-0.445503	1.07474e-17	2.31496e-16	H2AFJ	protein_coding	H2A histone family member J [Source:HGNC Symbol;Acc:HGNC:14456]
ENSG00000112996	2761.44	2660.5	2671.62	2118.62	2026.15	2115.81	2697.86	2086.86	0.369683	1.09424e-17	2.3539e-16	MRPS30	protein_coding	mitochondrial ribosomal protein S30 [Source:HGNC Symbol;Acc:HGNC:8769]
ENSG00000154473	1291.68	1271.94	1253.64	1832.34	1689.34	1734.49	1272.42	1752.06	-0.462549	1.11435e-17	2.39403e-16	BUB3	protein_coding	BUB3, mitotic checkpoint protein [Source:HGNC Symbol;Acc:HGNC:1151]
ENSG00000139354	188.566	154.586	145.38	375.182	348.527	342.157	162.844	355.289	-1.12801	1.12448e-17	2.41268e-16	GAS2L3	protein_coding	growth arrest specific 2 like 3 [Source:HGNC Symbol;Acc:HGNC:27475]
ENSG00000113569	3939.98	4018.33	3949.5	3254.83	3185.77	3225.76	3969.27	3222.12	0.300817	1.13499e-17	2.43206e-16	NUP155	protein_coding	nucleoporin 155 [Source:HGNC Symbol;Acc:HGNC:8063]
ENSG00000176046	1554.62	1540.43	1551.78	1153.11	1108.46	1059.45	1548.94	1107.01	0.483431	1.17576e-17	2.51616e-16	NUPR1	protein_coding	nuclear protein 1, transcriptional regulator [Source:HGNC Symbol;Acc:HGNC:29990]
ENSG00000188486	1478.15	1330.7	1314.74	1925.7	1855.61	1930.3	1374.53	1903.87	-0.470975	1.20411e-17	2.57349e-16	H2AFX	protein_coding	H2A histone family member X [Source:HGNC Symbol;Acc:HGNC:4739]
ENSG00000169967	927.115	945.595	966.041	1377.15	1293.92	1494.36	946.25	1388.48	-0.553385	1.21297e-17	2.58909e-16	MAP3K2	protein_coding	mitogen-activated protein kinase kinase kinase 2 [Source:HGNC Symbol;Acc:HGNC:6854]
ENSG00000184292	9645.14	9172.99	9399.15	11055.4	10997.2	10817.1	9405.76	10956.6	-0.220667	1.22546e-17	2.61236e-16	TACSTD2	protein_coding	tumor associated calcium signal transducer 2 [Source:HGNC Symbol;Acc:HGNC:11530]
ENSG00000092068	560.459	536.078	584.681	886.389	870.784	862.607	560.406	873.26	-0.641565	1.3241e-17	2.819e-16	SLC7A8	protein_coding	solute carrier family 7 member 8 [Source:HGNC Symbol;Acc:HGNC:11066]
ENSG00000088682	1938.04	2040.35	2030.06	1490.95	1527.34	1464.47	2002.81	1494.25	0.423167	1.52019e-17	3.23231e-16	COQ9	protein_coding	coenzyme Q9 [Source:HGNC Symbol;Acc:HGNC:25302]
ENSG00000104419	2000.89	2090.98	2159.63	2741.85	2664.58	2699.12	2083.83	2701.85	-0.375008	1.54705e-17	3.28519e-16	NDRG1	protein_coding	N-myc downstream regulated 1 [Source:HGNC Symbol;Acc:HGNC:7679]
ENSG00000144320	157.138	178.09	139.059	355.622	329.342	350.402	158.096	345.122	-1.12298	1.60774e-17	3.40968e-16	LNPK	protein_coding	lunapark, ER junction formation factor [Source:HGNC Symbol;Acc:HGNC:21610]
ENSG00000143753	2622.11	2654.17	2676.89	2044.83	2057.05	2099.32	2651.06	2067.07	0.359244	1.74154e-17	3.68872e-16	DEGS1	protein_coding	delta 4-desaturase, sphingolipid 1 [Source:HGNC Symbol;Acc:HGNC:13709]
ENSG00000130309	4878.61	4756.9	4878.66	4014.09	3997.93	3977.06	4838.06	3996.36	0.275307	1.75553e-17	3.71358e-16	COLGALT1	protein_coding	collagen beta(1-O)galactosyltransferase 1 [Source:HGNC Symbol;Acc:HGNC:26182]
ENSG00000143933	5919.92	5982.74	6088.06	6975.53	7104.83	7197.67	5996.91	7092.68	-0.24188	1.87514e-17	3.96154e-16	CALM2	protein_coding	calmodulin 2 [Source:HGNC Symbol;Acc:HGNC:1445]
ENSG00000213626	104.759	72.3208	76.904	236.489	256.865	214.363	84.6612	235.906	-1.48277	1.89048e-17	3.98884e-16	LBH	protein_coding	limb bud and heart development [Source:HGNC Symbol;Acc:HGNC:29532]
ENSG00000141522	3332.38	3183.02	3190.99	2580.93	2568.65	2541.44	3235.46	2563.68	0.335298	1.98529e-17	4.18354e-16	ARHGDIA	protein_coding	Rho GDP dissociation inhibitor alpha [Source:HGNC Symbol;Acc:HGNC:678]
ENSG00000070018	1267.58	1259.29	1202.02	1736.33	1664.83	1704.6	1242.96	1701.92	-0.453535	2.1796e-17	4.58716e-16	LRP6	protein_coding	LDL receptor related protein 6 [Source:HGNC Symbol;Acc:HGNC:6698]
ENSG00000101084	3340.76	3368.34	3228.92	2570.26	2672.04	2647.6	3312.67	2629.96	0.333907	2.23818e-17	4.70446e-16	RAB5IF	protein_coding	RAB5 interacting factor [Source:HGNC Symbol;Acc:HGNC:15870]
ENSG00000146540	2140.22	1927.35	2188.08	1542.51	1515.61	1459.32	2085.22	1505.81	0.467956	2.32221e-17	4.87488e-16	C7orf50	protein_coding	chromosome 7 open reading frame 50 [Source:HGNC Symbol;Acc:HGNC:22421]
ENSG00000070087	1413.2	1379.52	1370.58	1798.56	1988.84	1914.84	1387.76	1900.75	-0.452726	2.42471e-17	5.08359e-16	PFN2	protein_coding	profilin 2 [Source:HGNC Symbol;Acc:HGNC:8882]
ENSG00000100221	1235.11	1291.83	1451.7	877.498	897.43	897.647	1326.21	890.858	0.573917	2.68545e-17	5.6231e-16	JOSD1	protein_coding	Josephin domain containing 1 [Source:HGNC Symbol;Acc:HGNC:28953]
ENSG00000182134	648.457	583.087	623.66	923.729	941.129	999.676	618.401	954.845	-0.627682	3.01831e-17	6.31209e-16	TDRKH	protein_coding	tudor and KH domain containing [Source:HGNC Symbol;Acc:HGNC:11713]
ENSG00000136235	4633.48	4694.53	4702.73	3874.51	3851.91	3882.25	4676.91	3869.56	0.273407	3.21663e-17	6.71833e-16	GPNMB	protein_coding	glycoprotein nmb [Source:HGNC Symbol;Acc:HGNC:4462]
ENSG00000270168	881.021	912.146	894.404	614.338	559.561	551.368	895.857	575.089	0.637813	3.22247e-17	6.72203e-16	AC004233.2	protein_coding	novel protein
ENSG00000060656	4919.47	4572.48	4456.22	3652.24	3725.08	3745.18	4649.39	3707.5	0.326654	3.40109e-17	7.08417e-16	PTPRU	protein_coding	protein tyrosine phosphatase, receptor type U [Source:HGNC Symbol;Acc:HGNC:9683]
ENSG00000069424	997.303	1019.72	1076.66	682.795	710.909	662.672	1031.23	685.459	0.589294	3.40466e-17	7.08417e-16	KCNAB2	protein_coding	potassium voltage-gated channel subfamily A regulatory beta subunit 2 [Source:HGNC Symbol;Acc:HGNC:6229]
ENSG00000067208	83.807	79.5529	94.8132	224.042	216.364	232.914	86.0577	224.44	-1.38592	3.82286e-17	7.94434e-16	EVI5	protein_coding	ecotropic viral integration site 5 [Source:HGNC Symbol;Acc:HGNC:3501]
ENSG00000196878	5267.27	5303.83	5333.77	4384.82	4469.03	4435.68	5301.62	4429.84	0.259455	4.05675e-17	8.41979e-16	LAMB3	protein_coding	laminin subunit beta 3 [Source:HGNC Symbol;Acc:HGNC:6490]
ENSG00000128595	9863.03	10073.4	10093.4	11355	11564.3	11582.8	10009.9	11500.7	-0.199979	4.11982e-17	8.53997e-16	CALU	protein_coding	calumenin [Source:HGNC Symbol;Acc:HGNC:1458]
ENSG00000108256	5955.53	6209.65	6247.13	7279.59	7298.81	7209	6137.44	7262.47	-0.242637	4.28493e-17	8.87109e-16	NUFIP2	protein_coding	NUFIP2, FMR1 interacting protein 2 [Source:HGNC Symbol;Acc:HGNC:17634]
ENSG00000223573	4268.92	3970.41	4188.64	3349.96	3355.24	3269.04	4142.66	3324.75	0.316489	4.34483e-17	8.98385e-16	TINCR	protein_coding	TINCR ubiquitin domain containing [Source:HGNC Symbol;Acc:HGNC:14607]
ENSG00000157368	252.469	300.131	274.958	118.244	106.583	123.671	275.853	116.166	1.24816	4.35211e-17	8.98765e-16	IL34	protein_coding	interleukin 34 [Source:HGNC Symbol;Acc:HGNC:28529]
ENSG00000198886	122764	128916	128706	113338	112965	113475	126795	113259	0.162902	4.39918e-17	9.07352e-16	MT-ND4	protein_coding	mitochondrially encoded NADH:ubiquinone oxidoreductase core subunit 4 [Source:HGNC Symbol;Acc:HGNC:7459]
ENSG00000107438	4721.48	4732.49	4968.21	5865.1	5788.53	5711.55	4807.39	5788.39	-0.268455	4.46671e-17	9.20132e-16	PDLIM1	protein_coding	PDZ and LIM domain 1 [Source:HGNC Symbol;Acc:HGNC:2067]
ENSG00000070814	8260.23	8021.28	8055.96	6911.52	7035.55	6777.18	8112.49	6908.09	0.231753	4.50361e-17	9.26577e-16	TCOF1	protein_coding	treacle ribosome biogenesis factor 1 [Source:HGNC Symbol;Acc:HGNC:11654]
ENSG00000129103	2850.49	2844.02	3001.36	3553.56	3822.07	3634.9	2898.62	3670.18	-0.340198	5.02831e-17	1.03324e-15	SUMF2	protein_coding	sulfatase modifying factor 2 [Source:HGNC Symbol;Acc:HGNC:20415]
ENSG00000147813	1974.7	1923.73	1904.69	2469.8	2570.78	2469.3	1934.38	2503.29	-0.371677	5.07029e-17	1.04057e-15	NAPRT	protein_coding	nicotinate phosphoribosyltransferase [Source:HGNC Symbol;Acc:HGNC:30450]
ENSG00000169926	4682.72	4519.15	4463.59	3751.82	3624.89	3769.91	4555.15	3715.54	0.29348	5.22653e-17	1.07131e-15	KLF13	protein_coding	Kruppel like factor 13 [Source:HGNC Symbol;Acc:HGNC:13672]
ENSG00000278259	1390.15	1414.78	1454.86	993.076	1045.58	1000.71	1419.93	1013.12	0.487639	5.74766e-17	1.17667e-15	MYO19	protein_coding	myosin XIX [Source:HGNC Symbol;Acc:HGNC:26234]
ENSG00000104833	113.139	111.193	105.348	29.3389	15.9875	15.4589	109.894	20.2617	2.41823	5.77464e-17	1.18073e-15	TUBB4A	protein_coding	tubulin beta 4A class IVa [Source:HGNC Symbol;Acc:HGNC:20774]
ENSG00000213064	463.034	508.958	471.959	735.249	834.546	782.221	481.317	784.005	-0.700846	5.96065e-17	1.21725e-15	SFT2D2	protein_coding	SFT2 domain containing 2 [Source:HGNC Symbol;Acc:HGNC:25140]
ENSG00000181085	1152.35	1132.72	1158.83	775.257	761.003	824.475	1147.97	786.912	0.544711	6.16031e-17	1.25648e-15	MAPK15	protein_coding	mitogen-activated protein kinase 15 [Source:HGNC Symbol;Acc:HGNC:24667]
ENSG00000198074	7006.26	7006.98	7475.49	5673.07	6090.16	5869.23	7162.91	5877.49	0.285667	6.29444e-17	1.28225e-15	AKR1B10	protein_coding	aldo-keto reductase family 1 member B10 [Source:HGNC Symbol;Acc:HGNC:382]
ENSG00000109586	1781.95	1741.12	1735.08	1279.35	1331.22	1283.09	1752.72	1297.89	0.433827	6.35103e-17	1.29219e-15	GALNT7	protein_coding	polypeptide N-acetylgalactosaminyltransferase 7 [Source:HGNC Symbol;Acc:HGNC:4129]
ENSG00000180917	596.077	670.776	642.623	1070.42	940.063	968.758	636.492	993.082	-0.64206	6.60719e-17	1.34265e-15	CMTR2	protein_coding	cap methyltransferase 2 [Source:HGNC Symbol;Acc:HGNC:25635]
ENSG00000198586	832.832	814.513	784.842	1150.44	1160.69	1233.62	810.729	1181.58	-0.542814	7.05078e-17	1.43073e-15	TLK1	protein_coding	tousled like kinase 1 [Source:HGNC Symbol;Acc:HGNC:11841]
ENSG00000106415	303.8	303.747	338.167	548.548	574.483	536.939	315.238	553.323	-0.812488	7.05797e-17	1.43073e-15	GLCCI1	protein_coding	glucocorticoid induced 1 [Source:HGNC Symbol;Acc:HGNC:18713]
ENSG00000143314	1350.34	1341.55	1356.88	996.632	937.931	923.412	1349.59	952.658	0.501036	7.34161e-17	1.48641e-15	MRPL24	protein_coding	mitochondrial ribosomal protein L24 [Source:HGNC Symbol;Acc:HGNC:14037]
ENSG00000074800	38248.5	39495.3	40351.4	35069.7	34987	33984.9	39365.1	34680.5	0.182751	7.63093e-17	1.54309e-15	ENO1	protein_coding	enolase 1 [Source:HGNC Symbol;Acc:HGNC:3350]
ENSG00000248323	170.757	163.626	165.396	327.173	347.461	356.585	166.593	343.74	-1.04452	8.35114e-17	1.68666e-15	LUCAT1	antisense	lung cancer associated transcript 1 [Source:HGNC Symbol;Acc:HGNC:48498]
ENSG00000058668	1717	1858.65	1768.79	2299.99	2349.09	2370.37	1781.48	2339.82	-0.391942	8.59814e-17	1.73443e-15	ATP2B4	protein_coding	ATPase plasma membrane Ca2+ transporting 4 [Source:HGNC Symbol;Acc:HGNC:817]
ENSG00000107937	1588.14	1702.25	1568.63	2081.28	2209.47	2289.98	1619.67	2193.58	-0.4356	8.70512e-17	1.75387e-15	GTPBP4	protein_coding	GTP binding protein 4 [Source:HGNC Symbol;Acc:HGNC:21535]
ENSG00000140694	959.59	978.139	994.485	1349.59	1363.2	1397.48	977.405	1370.09	-0.486939	8.8234e-17	1.77553e-15	PARN	protein_coding	poly(A)-specific ribonuclease [Source:HGNC Symbol;Acc:HGNC:8609]
ENSG00000115307	2683.92	2635.19	2824.38	2148.85	2067.71	2085.92	2714.5	2100.83	0.368543	8.86024e-17	1.78078e-15	AUP1	protein_coding	AUP1, lipid droplet regulating VLDL assembly factor [Source:HGNC Symbol;Acc:HGNC:891]
ENSG00000080371	681.979	701.512	733.222	1043.75	1053.04	1030.59	705.571	1042.46	-0.563311	1.02909e-16	2.06581e-15	RAB21	protein_coding	RAB21, member RAS oncogene family [Source:HGNC Symbol;Acc:HGNC:18263]
ENSG00000162366	1779.85	1864.07	1944.72	2636.05	2424.77	2403.34	1862.88	2488.05	-0.418536	1.03856e-16	2.08229e-15	PDZK1IP1	protein_coding	PDZK1 interacting protein 1 [Source:HGNC Symbol;Acc:HGNC:16887]
ENSG00000172009	2810.68	2694.85	2625.27	2117.73	2122.07	2092.11	2710.27	2110.64	0.360621	1.09703e-16	2.19685e-15	THOP1	protein_coding	thimet oligopeptidase 1 [Source:HGNC Symbol;Acc:HGNC:11793]
ENSG00000168077	4240.63	4265.12	4190.74	3430.87	3481	3524.63	4232.17	3478.83	0.283279	1.19907e-16	2.39828e-15	SCARA3	protein_coding	scavenger receptor class A member 3 [Source:HGNC Symbol;Acc:HGNC:19000]
ENSG00000008277	172.852	177.186	199.108	373.404	350.658	384.411	183.049	369.491	-1.01488	1.22109e-16	2.43938e-15	ADAM22	protein_coding	ADAM metallopeptidase domain 22 [Source:HGNC Symbol;Acc:HGNC:201]
ENSG00000115884	3210.86	3154.09	3253.15	4047.87	3850.85	3955.42	3206.03	3951.38	-0.30251	1.32865e-16	2.65104e-15	SDC1	protein_coding	syndecan 1 [Source:HGNC Symbol;Acc:HGNC:10658]
ENSG00000212907	37052.1	37607.7	39090.4	32610.6	32474.8	34119.9	37916.8	33068.4	0.197387	1.36322e-16	2.71674e-15	MT-ND4L	protein_coding	mitochondrially encoded NADH:ubiquinone oxidoreductase core subunit 4L [Source:HGNC Symbol;Acc:HGNC:7460]
ENSG00000117335	5603.54	5744.08	5767.8	6799.5	6610.28	7050.29	5705.14	6820.03	-0.257469	1.40871e-16	2.80402e-15	CD46	protein_coding	CD46 molecule [Source:HGNC Symbol;Acc:HGNC:6953]
ENSG00000102886	1377.58	1484.38	1466.44	1046.42	1045.58	982.156	1442.8	1024.72	0.493795	1.45302e-16	2.88873e-15	GDPD3	protein_coding	glycerophosphodiester phosphodiesterase domain containing 3 [Source:HGNC Symbol;Acc:HGNC:28638]
ENSG00000167565	381.322	348.044	335.007	620.561	589.405	597.744	354.791	602.57	-0.765369	1.72895e-16	3.43317e-15	SERTAD3	protein_coding	SERTA domain containing 3 [Source:HGNC Symbol;Acc:HGNC:17931]
ENSG00000104343	316.371	313.692	312.883	543.213	516.928	591.561	314.315	550.567	-0.808781	1.75332e-16	3.47738e-15	UBE2W	protein_coding	ubiquitin conjugating enzyme E2 W [Source:HGNC Symbol;Acc:HGNC:25616]
ENSG00000099246	1213.11	1313.53	1299.99	899.725	901.693	879.096	1275.54	893.505	0.514039	1.78574e-16	3.53744e-15	RAB18	protein_coding	RAB18, member RAS oncogene family [Source:HGNC Symbol;Acc:HGNC:14244]
ENSG00000118503	1821.75	1739.32	1861.5	1362.92	1350.41	1277.94	1807.52	1330.42	0.440857	1.81441e-16	3.58993e-15	TNFAIP3	protein_coding	TNF alpha induced protein 3 [Source:HGNC Symbol;Acc:HGNC:11896]
ENSG00000136875	583.506	623.767	580.467	1001.97	952.853	853.332	595.914	936.05	-0.651479	1.93213e-16	3.81826e-15	PRPF4	protein_coding	pre-mRNA processing factor 4 [Source:HGNC Symbol;Acc:HGNC:17349]
ENSG00000114573	551.031	527.038	565.719	818.821	864.389	855.393	547.929	846.201	-0.627337	1.93506e-16	3.81949e-15	ATP6V1A	protein_coding	ATPase H+ transporting V1 subunit A [Source:HGNC Symbol;Acc:HGNC:851]
ENSG00000111667	3202.47	3090.81	3305.82	2566.7	2547.34	2478.58	3199.7	2530.87	0.337367	2.05497e-16	4.05133e-15	USP5	protein_coding	ubiquitin specific peptidase 5 [Source:HGNC Symbol;Acc:HGNC:12628]
ENSG00000125898	653.694	668.968	606.804	1018.86	940.063	965.666	643.155	974.863	-0.599972	2.17279e-16	4.2785e-15	FAM110A	protein_coding	family with sequence similarity 110 member A [Source:HGNC Symbol;Acc:HGNC:16188]
ENSG00000177106	5310.22	5115.79	5090.41	6202.94	6106.15	6119.67	5172.14	6142.92	-0.248564	2.22529e-16	4.37667e-15	EPS8L2	protein_coding	EPS8 like 2 [Source:HGNC Symbol;Acc:HGNC:21296]
ENSG00000102178	2148.6	2177.76	2149.1	1699.88	1631.79	1621.12	2158.49	1650.93	0.386115	2.23429e-16	4.38914e-15	UBL4A	protein_coding	ubiquitin like 4A [Source:HGNC Symbol;Acc:HGNC:12505]
ENSG00000255112	1736.9	1790.84	1777.22	2352.44	2326.71	2226.08	1768.32	2301.74	-0.380435	2.37338e-16	4.65684e-15	CHMP1B	protein_coding	charged multivesicular body protein 1B [Source:HGNC Symbol;Acc:HGNC:24287]
ENSG00000092871	122.568	91.305	99.0271	262.272	234.483	274.138	104.3	256.964	-1.3055	2.45043e-16	4.80232e-15	RFFL	protein_coding	ring finger and FYVE like domain containing E3 ubiquitin protein ligase [Source:HGNC Symbol;Acc:HGNC:24821]
ENSG00000151632	191.708	188.034	197.001	344.954	394.358	436.972	192.248	392.094	-1.02674	2.47078e-16	4.83646e-15	AKR1C2	protein_coding	aldo-keto reductase family 1 member C2 [Source:HGNC Symbol;Acc:HGNC:385]
ENSG00000113719	3018.1	2993.18	3016.11	2435.12	2413.04	2347.69	3009.13	2398.62	0.32669	2.6167e-16	5.11603e-15	ERGIC1	protein_coding	endoplasmic reticulum-golgi intermediate compartment 1 [Source:HGNC Symbol;Acc:HGNC:29205]
ENSG00000144840	355.132	339.908	347.648	164.475	185.455	163.864	347.563	171.265	1.02249	2.73437e-16	5.33977e-15	RABL3	protein_coding	RAB, member of RAS oncogene family like 3 [Source:HGNC Symbol;Acc:HGNC:18072]
ENSG00000070159	2053.27	2071.99	2089.05	1587.85	1609.41	1552.07	2071.44	1583.11	0.387891	2.92597e-16	5.70719e-15	PTPN3	protein_coding	protein tyrosine phosphatase, non-receptor type 3 [Source:HGNC Symbol;Acc:HGNC:9655]
ENSG00000070961	1683.47	1728.47	1678.19	2190.63	2183.89	2241.54	1696.71	2205.35	-0.377682	2.99055e-16	5.82628e-15	ATP2B1	protein_coding	ATPase plasma membrane Ca2+ transporting 1 [Source:HGNC Symbol;Acc:HGNC:814]
ENSG00000135272	4911.09	4830.13	4776.48	5749.53	5714.99	5742.47	4839.23	5735.66	-0.245274	3.01247e-16	5.86207e-15	MDFIC	protein_coding	MyoD family inhibitor domain containing [Source:HGNC Symbol;Acc:HGNC:28870]
ENSG00000169564	2650.4	2646.04	2615.79	3263.72	3345.64	3228.85	2637.41	3279.41	-0.31403	3.17744e-16	6.17582e-15	PCBP1	protein_coding	poly(rC) binding protein 1 [Source:HGNC Symbol;Acc:HGNC:8647]
ENSG00000101213	328.942	365.22	296.028	567.218	624.577	563.735	330.063	585.177	-0.822354	3.34718e-16	6.49808e-15	PTK6	protein_coding	protein tyrosine kinase 6 [Source:HGNC Symbol;Acc:HGNC:9617]
ENSG00000161395	955.4	875.082	819.607	1298.91	1274.73	1268.66	883.363	1280.77	-0.536372	3.45714e-16	6.70368e-15	PGAP3	protein_coding	post-GPI attachment to proteins 3 [Source:HGNC Symbol;Acc:HGNC:23719]
ENSG00000141682	1455.1	1457.26	1520.17	1085.54	1071.16	1063.57	1477.51	1073.42	0.460309	3.52515e-16	6.82754e-15	PMAIP1	protein_coding	phorbol-12-myristate-13-acetate-induced protein 1 [Source:HGNC Symbol;Acc:HGNC:9108]
ENSG00000101557	2659.82	2609.88	2735.89	2067.06	2144.45	2056.03	2668.53	2089.18	0.353044	3.9021e-16	7.54878e-15	USP14	protein_coding	ubiquitin specific peptidase 14 [Source:HGNC Symbol;Acc:HGNC:12612]
ENSG00000129657	6208	6023.42	6132.31	5195.64	5200.19	5154	6121.24	5183.28	0.239626	4.13062e-16	7.98152e-15	SEC14L1	protein_coding	SEC14 like lipid binding 1 [Source:HGNC Symbol;Acc:HGNC:10698]
ENSG00000272734	295.42	272.107	313.937	499.65	527.586	529.725	293.821	518.987	-0.822197	4.13581e-16	7.98221e-15	ADIRF-AS1	processed_transcript	ADIRF antisense RNA 1 [Source:HGNC Symbol;Acc:HGNC:45127]
ENSG00000009830	1351.39	1424.72	1422.2	1004.63	1029.59	980.095	1399.44	1004.77	0.4785	4.18303e-16	8.06392e-15	POMT2	protein_coding	protein O-mannosyltransferase 2 [Source:HGNC Symbol;Acc:HGNC:19743]
ENSG00000157514	170.757	188.938	176.985	335.174	381.568	366.891	178.893	361.211	-1.01027	4.19844e-16	8.0842e-15	TSC22D3	protein_coding	TSC22 domain family member 3 [Source:HGNC Symbol;Acc:HGNC:3051]
ENSG00000103363	4047.88	4190.99	4159.14	3452.2	3363.76	3339.12	4132.67	3385.03	0.287701	4.21495e-16	8.10654e-15	ELOB	protein_coding	elongin B [Source:HGNC Symbol;Acc:HGNC:11619]
ENSG00000137942	916.639	906.722	904.939	1258.9	1289.66	1278.97	909.433	1275.84	-0.488134	4.34486e-16	8.34668e-15	FNBP1L	protein_coding	formin binding protein 1 like [Source:HGNC Symbol;Acc:HGNC:20851]
ENSG00000015153	300.658	311.884	314.99	508.54	546.771	553.429	309.177	536.247	-0.793037	4.37816e-16	8.40088e-15	YAF2	protein_coding	YY1 associated factor 2 [Source:HGNC Symbol;Acc:HGNC:17363]
ENSG00000164091	1226.72	1194.2	1213.61	847.27	885.706	812.108	1211.51	848.361	0.51406	5.2474e-16	1.00571e-14	WDR82	protein_coding	WD repeat domain 82 [Source:HGNC Symbol;Acc:HGNC:28826]
ENSG00000114378	485.033	478.221	448.782	265.828	271.787	241.159	470.679	259.591	0.85847	5.43727e-16	1.04089e-14	HYAL1	protein_coding	hyaluronoglucosaminidase 1 [Source:HGNC Symbol;Acc:HGNC:5320]
ENSG00000197345	1350.34	1318.95	1382.17	1010.86	863.323	925.473	1350.49	933.218	0.530457	5.56315e-16	1.06376e-14	MRPL21	protein_coding	mitochondrial ribosomal protein L21 [Source:HGNC Symbol;Acc:HGNC:14479]
ENSG00000126457	4751.86	4749.67	4764.89	3912.74	4059.75	3790.52	4755.47	3921	0.278554	6.66383e-16	1.27275e-14	PRMT1	protein_coding	protein arginine methyltransferase 1 [Source:HGNC Symbol;Acc:HGNC:5187]
ENSG00000162613	2194.7	2210.31	2170.17	2821.86	2740.25	2732.1	2191.72	2764.74	-0.335337	7.0145e-16	1.33818e-14	FUBP1	protein_coding	far upstream element binding protein 1 [Source:HGNC Symbol;Acc:HGNC:4004]
ENSG00000154945	764.739	790.105	831.196	1132.66	1160.69	1138.81	795.346	1144.05	-0.524439	7.59647e-16	1.44753e-14	ANKRD40	protein_coding	ankyrin repeat domain 40 [Source:HGNC Symbol;Acc:HGNC:28233]
ENSG00000126890	4393.58	3936.06	4182.31	3364.19	3338.18	3165.98	4170.65	3289.45	0.341378	8.65003e-16	1.64639e-14	CTAG2	protein_coding	cancer/testis antigen 2 [Source:HGNC Symbol;Acc:HGNC:2492]
ENSG00000184402	1631.09	1585.63	1617.09	1194	1204.39	1190.34	1611.27	1196.24	0.429426	8.84455e-16	1.68055e-14	SS18L1	protein_coding	SS18L1, nBAF chromatin remodeling complex subunit [Source:HGNC Symbol;Acc:HGNC:15592]
ENSG00000138386	908.258	912.146	888.083	1257.13	1235.3	1362.44	902.829	1284.96	-0.508665	8.84979e-16	1.68055e-14	NAB1	protein_coding	NGFI-A binding protein 1 [Source:HGNC Symbol;Acc:HGNC:7626]
ENSG00000186298	3972.45	3791.42	3953.71	3044.13	3198.56	3225.76	3905.86	3156.15	0.30774	8.95402e-16	1.69838e-14	PPP1CC	protein_coding	protein phosphatase 1 catalytic subunit gamma [Source:HGNC Symbol;Acc:HGNC:9283]
ENSG00000006062	784.643	694.28	747.971	488.092	439.122	451.4	742.298	459.538	0.688629	9.39901e-16	1.78075e-14	MAP3K14	protein_coding	mitogen-activated protein kinase kinase kinase 14 [Source:HGNC Symbol;Acc:HGNC:6853]
ENSG00000211455	229.422	248.603	282.333	451.64	483.887	464.798	253.452	466.775	-0.880909	9.47564e-16	1.79321e-14	STK38L	protein_coding	serine/threonine kinase 38 like [Source:HGNC Symbol;Acc:HGNC:17848]
ENSG00000143977	1073.78	1010.68	1060.85	737.917	689.593	718.324	1048.44	715.278	0.549808	9.59157e-16	1.81307e-14	SNRPG	protein_coding	small nuclear ribonucleoprotein polypeptide G [Source:HGNC Symbol;Acc:HGNC:11163]
ENSG00000146386	431.606	469.181	474.066	716.579	717.304	746.15	458.284	726.678	-0.664199	1.05897e-15	1.99946e-14	ABRACL	protein_coding	ABRA C-terminal like [Source:HGNC Symbol;Acc:HGNC:21230]
ENSG00000003249	1281.2	1227.65	1171.47	866.83	854.797	864.668	1226.77	862.098	0.508798	1.06926e-15	2.01658e-14	DBNDD1	protein_coding	dysbindin domain containing 1 [Source:HGNC Symbol;Acc:HGNC:28455]
ENSG00000101752	1856.32	1827	1839.38	2366.67	2313.92	2392.01	1840.9	2357.53	-0.357234	1.086e-15	2.04582e-14	MIB1	protein_coding	mindbomb E3 ubiquitin protein ligase 1 [Source:HGNC Symbol;Acc:HGNC:21086]
ENSG00000100596	4091.88	4247.04	4304.52	3338.41	3511.91	3468.98	4214.48	3439.77	0.293864	1.10922e-15	2.08717e-14	SPTLC2	protein_coding	serine palmitoyltransferase long chain base subunit 2 [Source:HGNC Symbol;Acc:HGNC:11278]
ENSG00000176148	656.837	693.376	715.313	424.08	446.583	414.299	688.509	428.321	0.685467	1.13008e-15	2.12402e-14	TCP11L1	protein_coding	t-complex 11 like 1 [Source:HGNC Symbol;Acc:HGNC:25655]
ENSG00000137815	1862.61	1925.54	1807.77	1439.38	1372.79	1388.21	1865.31	1400.13	0.413733	1.18711e-15	2.22866e-14	RTF1	protein_coding	RTF1 homolog, Paf1/RNA polymerase II complex component [Source:HGNC Symbol;Acc:HGNC:28996]
ENSG00000082153	2126.6	2216.63	2299.75	2818.31	2828.72	2784.66	2214.33	2810.56	-0.344025	1.25473e-15	2.35293e-14	BZW1	protein_coding	basic leucine zipper and W2 domains 1 [Source:HGNC Symbol;Acc:HGNC:18380]
ENSG00000153046	531.127	523.422	521.472	793.038	815.361	799.741	525.34	802.713	-0.61138	1.33026e-15	2.49176e-14	CDYL	protein_coding	chromodomain Y like [Source:HGNC Symbol;Acc:HGNC:1811]
ENSG00000148344	5231.65	5102.23	5251.6	4348.37	4344.33	4395.48	5195.16	4362.73	0.251634	1.33765e-15	2.50276e-14	PTGES	protein_coding	prostaglandin E synthase [Source:HGNC Symbol;Acc:HGNC:9599]
ENSG00000152127	1372.34	1340.65	1331.6	1798.56	1843.89	1742.73	1348.19	1795.06	-0.413041	1.40684e-15	2.62923e-14	MGAT5	protein_coding	alpha-1,6-mannosylglycoprotein 6-beta-N-acetylglucosaminyltransferase [Source:HGNC Symbol;Acc:HGNC:7049]
ENSG00000117298	4073.02	3955.04	3937.91	3275.28	3331.79	3182.47	3988.66	3263.18	0.2895	1.44266e-15	2.69313e-14	ECE1	protein_coding	endothelin converting enzyme 1 [Source:HGNC Symbol;Acc:HGNC:3146]
ENSG00000116918	203.232	224.195	199.108	383.183	387.963	432.849	208.845	401.332	-0.939356	1.47949e-15	2.75877e-14	TSNAX	protein_coding	translin associated factor X [Source:HGNC Symbol;Acc:HGNC:12380]
ENSG00000136603	1039.21	1051.36	1089.3	1386.93	1513.48	1537.65	1059.96	1479.35	-0.479898	1.78666e-15	3.32777e-14	SKIL	protein_coding	SKI like proto-oncogene [Source:HGNC Symbol;Acc:HGNC:10897]
ENSG00000196517	934.448	913.954	932.33	652.567	595.8	612.173	926.911	620.18	0.57774	1.78948e-15	3.32929e-14	SLC6A9	protein_coding	solute carrier family 6 member 9 [Source:HGNC Symbol;Acc:HGNC:11056]
ENSG00000088340	602.363	600.263	566.772	904.17	910.22	852.301	589.799	888.897	-0.591499	1.91999e-15	3.56807e-14	FER1L4	transcribed_unitary_pseudogene	fer-1 like family member 4, pseudogene [Source:HGNC Symbol;Acc:HGNC:15801]
ENSG00000079459	2740.49	2742.77	2799.1	2227.09	2171.1	2197.23	2760.78	2198.47	0.32803	2.01502e-15	3.74047e-14	FDFT1	protein_coding	farnesyl-diphosphate farnesyltransferase 1 [Source:HGNC Symbol;Acc:HGNC:3629]
ENSG00000134265	1235.11	1244.82	1284.19	913.95	860.126	903.831	1254.71	892.635	0.490147	2.082e-15	3.86046e-14	NAPG	protein_coding	NSF attachment protein gamma [Source:HGNC Symbol;Acc:HGNC:7642]
ENSG00000114859	766.834	768.409	758.505	495.204	486.019	508.083	764.583	496.435	0.623116	2.14848e-15	3.97926e-14	CLCN2	protein_coding	chloride voltage-gated channel 2 [Source:HGNC Symbol;Acc:HGNC:2020]
ENSG00000013275	2340.31	2418.23	2477.78	1890.13	1893.98	1868.47	2412.11	1884.19	0.35633	2.2295e-15	4.12471e-14	PSMC4	protein_coding	proteasome 26S subunit, ATPase 4 [Source:HGNC Symbol;Acc:HGNC:9551]
ENSG00000007923	1972.61	2011.42	2108.01	1527.4	1561.44	1558.26	2030.68	1549.03	0.390761	2.24981e-15	4.15762e-14	DNAJC11	protein_coding	DnaJ heat shock protein family (Hsp40) member C11 [Source:HGNC Symbol;Acc:HGNC:25570]
ENSG00000140575	7666.24	8041.17	7959.04	6691.93	6793.61	6791.61	7888.82	6759.05	0.223483	2.31286e-15	4.26935e-14	IQGAP1	protein_coding	IQ motif containing GTPase activating protein 1 [Source:HGNC Symbol;Acc:HGNC:6110]
ENSG00000115221	172.852	178.09	167.503	360.068	394.358	310.209	172.815	354.878	-1.03695	2.33528e-15	4.30594e-14	ITGB6	protein_coding	integrin subunit beta 6 [Source:HGNC Symbol;Acc:HGNC:6161]
ENSG00000196154	560.459	525.23	577.307	298.723	330.408	341.126	554.332	323.419	0.778587	2.35019e-15	4.32859e-14	S100A4	protein_coding	S100 calcium binding protein A4 [Source:HGNC Symbol;Acc:HGNC:10494]
ENSG00000169689	2460.78	2335.96	2417.74	1923.03	1863.07	1799.42	2404.83	1861.84	0.367887	2.4634e-15	4.53205e-14	CENPX	protein_coding	centromere protein X [Source:HGNC Symbol;Acc:HGNC:11422]
ENSG00000163902	5114.32	4991.94	5283.2	4248.8	4324.08	4250.17	5129.82	4274.35	0.262886	2.53169e-15	4.6525e-14	RPN1	protein_coding	ribophorin I [Source:HGNC Symbol;Acc:HGNC:10381]
ENSG00000160767	2248.12	2080.13	2086.94	1665.2	1598.75	1610.82	2138.4	1624.92	0.395005	2.54373e-15	4.66944e-14	FAM189B	protein_coding	family with sequence similarity 189 member B [Source:HGNC Symbol;Acc:HGNC:1233]
ENSG00000121966	400.178	442.965	412.964	235.6	195.047	231.884	418.702	220.844	0.921281	2.67873e-15	4.91179e-14	CXCR4	protein_coding	C-X-C motif chemokine receptor 4 [Source:HGNC Symbol;Acc:HGNC:2561]
ENSG00000166598	22581.8	23081.2	23000.6	20651	20560.9	20590.2	22887.9	20600.7	0.151947	2.79063e-15	5.10585e-14	HSP90B1	protein_coding	heat shock protein 90 beta family member 1 [Source:HGNC Symbol;Acc:HGNC:12028]
ENSG00000163349	769.977	830.785	833.302	1198.45	1115.93	1181.06	811.355	1165.14	-0.522286	2.79074e-15	5.10585e-14	HIPK1	protein_coding	homeodomain interacting protein kinase 1 [Source:HGNC Symbol;Acc:HGNC:19006]
ENSG00000130193	2023.94	1823.39	1906.8	1439.38	1385.58	1458.29	1918.04	1427.75	0.424653	2.8437e-15	5.19699e-14	THEM6	protein_coding	thioesterase superfamily member 6 [Source:HGNC Symbol;Acc:HGNC:29656]
ENSG00000158864	2432.5	2379.35	2430.38	1940.81	1876.93	1743.76	2414.08	1853.83	0.379746	3.31748e-15	6.05615e-14	NDUFS2	protein_coding	NADH:ubiquinone oxidoreductase core subunit S2 [Source:HGNC Symbol;Acc:HGNC:7708]
ENSG00000186432	1476.05	1505.18	1414.82	1928.36	1883.32	2001.41	1465.35	1937.7	-0.402441	3.38411e-15	6.17095e-14	KPNA4	protein_coding	karyopherin subunit alpha 4 [Source:HGNC Symbol;Acc:HGNC:6397]
ENSG00000152413	586.649	621.959	564.665	325.395	363.448	368.953	591.091	352.598	0.748795	3.41105e-15	6.21322e-14	HOMER1	protein_coding	homer scaffold protein 1 [Source:HGNC Symbol;Acc:HGNC:17512]
ENSG00000077254	1148.16	1118.26	1137.76	1550.51	1484.7	1577.84	1134.72	1537.69	-0.439152	3.44304e-15	6.2646e-14	USP33	protein_coding	ubiquitin specific peptidase 33 [Source:HGNC Symbol;Acc:HGNC:20059]
ENSG00000179115	2853.63	2707.51	2787.51	2241.31	2214.8	2057.06	2782.88	2171.06	0.357129	3.46362e-15	6.2951e-14	FARSA	protein_coding	phenylalanyl-tRNA synthetase subunit alpha [Source:HGNC Symbol;Acc:HGNC:3592]
ENSG00000067560	4039.5	3810.4	3937.91	4888.03	4657.68	4734.55	3929.27	4760.09	-0.277845	3.64459e-15	6.61673e-14	RHOA	protein_coding	ras homolog family member A [Source:HGNC Symbol;Acc:HGNC:667]
ENSG00000168890	332.085	327.252	260.209	555.66	551.035	526.633	306.515	544.443	-0.827194	3.78907e-15	6.87148e-14	TMEM150A	protein_coding	transmembrane protein 150A [Source:HGNC Symbol;Acc:HGNC:24677]
ENSG00000140853	2784.49	2721.07	2549.42	2146.18	1992.04	2087.98	2684.99	2075.4	0.370908	3.82247e-15	6.92446e-14	NLRC5	protein_coding	NLR family CARD domain containing 5 [Source:HGNC Symbol;Acc:HGNC:29933]
ENSG00000126432	3711.6	3929.73	4068.54	3229.94	2938.5	3077.35	3903.29	3081.93	0.33997	4.51757e-15	8.17468e-14	PRDX5	protein_coding	peroxiredoxin 5 [Source:HGNC Symbol;Acc:HGNC:9355]
ENSG00000106266	3428.75	3406.31	3362.71	2835.2	2643.26	2745.5	3399.26	2741.32	0.309461	4.65195e-15	8.40862e-14	SNX8	protein_coding	sorting nexin 8 [Source:HGNC Symbol;Acc:HGNC:14972]
ENSG00000111711	421.13	442.061	426.659	673.905	673.605	687.406	429.95	678.305	-0.65681	4.89968e-15	8.84674e-14	GOLT1B	protein_coding	golgi transport 1B [Source:HGNC Symbol;Acc:HGNC:20175]
ENSG00000115839	1236.15	1306.29	1236.79	1712.32	1630.72	1739.64	1259.74	1694.23	-0.426956	4.9159e-15	8.86634e-14	RAB3GAP1	protein_coding	RAB3 GTPase activating protein catalytic subunit 1 [Source:HGNC Symbol;Acc:HGNC:17063]
ENSG00000153292	31.4276	23.5043	17.9092	109.354	117.241	97.9064	24.2803	108.167	-2.15617	4.9734e-15	8.96026e-14	ADGRF1	protein_coding	adhesion G protein-coupled receptor F1 [Source:HGNC Symbol;Acc:HGNC:18990]
ENSG00000110717	1802.9	1586.54	1669.77	1208.23	1243.82	1237.74	1686.4	1229.93	0.454771	5.00963e-15	9.01569e-14	NDUFS8	protein_coding	NADH:ubiquinone oxidoreductase core subunit S8 [Source:HGNC Symbol;Acc:HGNC:7715]
ENSG00000075391	1132.44	1134.53	1211.5	1549.62	1547.59	1621.12	1159.49	1572.78	-0.440188	5.30496e-15	9.5368e-14	RASAL2	protein_coding	RAS protein activator like 2 [Source:HGNC Symbol;Acc:HGNC:9874]
ENSG00000112695	1507.48	1595.58	1547.56	1164.66	1077.56	1167.66	1550.21	1136.63	0.44738	6.70665e-15	1.20435e-13	COX7A2	protein_coding	cytochrome c oxidase subunit 7A2 [Source:HGNC Symbol;Acc:HGNC:2288]
ENSG00000129480	228.374	248.603	270.744	427.636	468.966	457.584	249.24	451.395	-0.855807	7.09499e-15	1.27271e-13	DTD2	protein_coding	D-tyrosyl-tRNA deacylase 2 (putative) [Source:HGNC Symbol;Acc:HGNC:20277]
ENSG00000118515	1009.87	964.579	986.057	1346.03	1356.8	1353.17	986.837	1352	-0.454715	7.1479e-15	1.28081e-13	SGK1	protein_coding	serum/glucocorticoid regulated kinase 1 [Source:HGNC Symbol;Acc:HGNC:10810]
ENSG00000149257	3374.28	3178.5	3354.28	2683.17	2683.76	2602.25	3302.35	2656.39	0.313147	7.88876e-15	1.41203e-13	SERPINH1	protein_coding	serpin family H member 1 [Source:HGNC Symbol;Acc:HGNC:1546]
ENSG00000131462	961.685	972.715	1015.55	689.018	683.198	651.335	983.318	674.517	0.543031	8.10075e-15	1.4484e-13	TUBG1	protein_coding	tubulin gamma 1 [Source:HGNC Symbol;Acc:HGNC:12417]
ENSG00000123124	3606.84	3575.36	3630.29	2926.77	2953.42	3005.21	3604.16	2961.8	0.283283	8.37771e-15	1.4963e-13	WWP1	protein_coding	WW domain containing E3 ubiquitin protein ligase 1 [Source:HGNC Symbol;Acc:HGNC:17004]
ENSG00000099817	2554.02	2496.88	2535.73	2067.94	1962.2	1900.41	2528.87	1976.85	0.353963	8.5315e-15	1.52213e-13	POLR2E	protein_coding	RNA polymerase II subunit E [Source:HGNC Symbol;Acc:HGNC:9192]
ENSG00000163659	428.463	444.773	461.424	757.476	659.749	709.048	444.887	708.758	-0.67356	8.80908e-15	1.56995e-13	TIPARP	protein_coding	TCDD inducible poly(ADP-ribose) polymerase [Source:HGNC Symbol;Acc:HGNC:23696]
ENSG00000076555	783.595	725.016	703.724	479.201	483.887	444.186	737.445	469.091	0.651976	8.85061e-15	1.57566e-13	ACACB	protein_coding	acetyl-CoA carboxylase beta [Source:HGNC Symbol;Acc:HGNC:85]
ENSG00000168016	654.742	721.4	729.008	1038.42	983.762	1072.85	701.717	1031.68	-0.555693	9.03322e-15	1.60644e-13	TRANK1	protein_coding	tetratricopeptide repeat and ankyrin repeat containing 1 [Source:HGNC Symbol;Acc:HGNC:29011]
ENSG00000010072	93.2353	94.0171	99.0271	212.484	250.47	219.516	95.4265	227.49	-1.25215	9.15609e-15	1.62654e-13	SPRTN	protein_coding	SprT-like N-terminal domain [Source:HGNC Symbol;Acc:HGNC:25356]
ENSG00000159692	1617.47	1597.39	1464.34	2186.19	2042.13	2012.75	1559.73	2080.36	-0.415901	9.252e-15	1.64181e-13	CTBP1	protein_coding	C-terminal binding protein 1 [Source:HGNC Symbol;Acc:HGNC:2494]
ENSG00000136802	1285.39	1319.85	1226.25	876.609	966.709	831.689	1277.17	891.669	0.519826	9.5304e-15	1.6894e-13	LRRC8A	protein_coding	leucine rich repeat containing 8 VRAC subunit A [Source:HGNC Symbol;Acc:HGNC:19027]
ENSG00000164039	84.8546	95.8251	100.081	241.823	250.47	196.843	93.5867	229.712	-1.29532	1.01293e-14	1.79364e-13	BDH2	protein_coding	3-hydroxybutyrate dehydrogenase 2 [Source:HGNC Symbol;Acc:HGNC:32389]
ENSG00000196141	1971.56	1921.02	2030.06	1538.07	1504.95	1499.51	1974.21	1514.18	0.381715	1.01409e-14	1.79377e-13	SPATS2L	protein_coding	spermatogenesis associated serine rich 2 like [Source:HGNC Symbol;Acc:HGNC:24574]
ENSG00000005022	10985	11206.1	11240.6	9829.4	9897.31	9559.79	11143.9	9762.17	0.191001	1.01883e-14	1.80022e-13	SLC25A5	protein_coding	solute carrier family 25 member 5 [Source:HGNC Symbol;Acc:HGNC:10991]
ENSG00000170190	533.222	573.143	528.847	832.157	801.505	840.964	545.07	824.875	-0.596586	1.02788e-14	1.81428e-13	SLC16A5	protein_coding	solute carrier family 16 member 5 [Source:HGNC Symbol;Acc:HGNC:10926]
ENSG00000123999	933.4	917.57	889.137	647.233	578.746	613.203	913.369	613.061	0.573435	1.08224e-14	1.90818e-13	INHA	protein_coding	inhibin subunit alpha [Source:HGNC Symbol;Acc:HGNC:6065]
ENSG00000107798	1179.58	1200.53	1238.89	1620.75	1686.14	1563.41	1206.33	1623.43	-0.428348	1.08528e-14	1.91151e-13	LIPA	protein_coding	lipase A, lysosomal acid type [Source:HGNC Symbol;Acc:HGNC:6617]
ENSG00000049239	712.359	686.144	685.815	975.295	1015.74	1019.26	694.773	1003.43	-0.529983	1.107e-14	1.94768e-13	H6PD	protein_coding	hexose-6-phosphate dehydrogenase/glucose 1-dehydrogenase [Source:HGNC Symbol;Acc:HGNC:4795]
ENSG00000116005	2350.79	2481.51	2567.33	1810.12	1810.85	2003.47	2466.54	1874.81	0.39631	1.12948e-14	1.98513e-13	PCYOX1	protein_coding	prenylcysteine oxidase 1 [Source:HGNC Symbol;Acc:HGNC:20588]
ENSG00000276180	613.886	565.91	611.018	895.279	877.179	884.249	596.938	885.569	-0.570789	1.14372e-14	2.00802e-13	HIST1H4I	protein_coding	histone cluster 1 H4 family member i [Source:HGNC Symbol;Acc:HGNC:4793]
ENSG00000148358	1999.84	2113.58	2121.71	2566.7	2676.3	2664.08	2078.38	2635.7	-0.34178	1.20347e-14	2.11067e-13	GPR107	protein_coding	G protein-coupled receptor 107 [Source:HGNC Symbol;Acc:HGNC:17830]
ENSG00000163170	359.322	386.916	395.055	209.817	206.771	190.66	380.431	202.416	0.909653	1.22567e-14	2.14733e-13	BOLA3	protein_coding	bolA family member 3 [Source:HGNC Symbol;Acc:HGNC:24415]
ENSG00000168672	1229.87	1262.9	1250.48	1606.52	1666.96	1738.61	1247.75	1670.7	-0.420047	1.3041e-14	2.28231e-13	FAM84B	protein_coding	family with sequence similarity 84 member B [Source:HGNC Symbol;Acc:HGNC:24166]
ENSG00000164291	296.467	307.363	307.616	140.471	156.677	152.528	303.816	149.892	1.02191	1.30842e-14	2.28745e-13	ARSK	protein_coding	arylsulfatase family member K [Source:HGNC Symbol;Acc:HGNC:25239]
ENSG00000123219	589.792	605.687	564.665	360.068	365.58	356.585	586.715	360.744	0.702568	1.31819e-14	2.3021e-13	CENPK	protein_coding	centromere protein K [Source:HGNC Symbol;Acc:HGNC:29479]
ENSG00000152484	428.463	452.909	500.403	745.029	725.831	705.957	460.592	725.606	-0.656768	1.32668e-14	2.31448e-13	USP12	protein_coding	ubiquitin specific peptidase 12 [Source:HGNC Symbol;Acc:HGNC:20485]
ENSG00000156675	1257.1	1303.58	1248.37	1675.87	1695.74	1673.68	1269.69	1681.76	-0.404657	1.33133e-14	2.32014e-13	RAB11FIP1	protein_coding	RAB11 family interacting protein 1 [Source:HGNC Symbol;Acc:HGNC:30265]
ENSG00000079785	2498.5	2553.83	2483.05	1991.49	1981.38	2015.84	2511.79	1996.24	0.331824	1.34683e-14	2.34468e-13	DDX1	protein_coding	DEAD-box helicase 1 [Source:HGNC Symbol;Acc:HGNC:2734]
ENSG00000006210	3163.71	2839.5	2940.26	2294.65	2323.51	2387.89	2981.16	2335.35	0.351792	1.53485e-14	2.66918e-13	CX3CL1	protein_coding	C-X3-C motif chemokine ligand 1 [Source:HGNC Symbol;Acc:HGNC:10647]
ENSG00000247556	2045.94	2094.59	1967.9	1594.97	1525.2	1574.75	2036.14	1564.97	0.379703	1.53877e-14	2.67318e-13	OIP5-AS1	processed_transcript	OIP5 antisense RNA 1 [Source:HGNC Symbol;Acc:HGNC:43563]
ENSG00000114416	4218.63	4531.8	4288.72	3612.23	3543.89	3573.07	4346.38	3576.4	0.281804	1.61828e-14	2.80836e-13	FXR1	protein_coding	FMR1 autosomal homolog 1 [Source:HGNC Symbol;Acc:HGNC:4023]
ENSG00000104447	399.131	405.901	425.606	621.45	658.684	683.284	410.212	654.472	-0.673217	1.64416e-14	2.85028e-13	TRPS1	protein_coding	transcriptional repressor GATA binding 1 [Source:HGNC Symbol;Acc:HGNC:12340]
ENSG00000095015	437.891	400.477	400.322	669.459	675.737	628.662	412.897	657.953	-0.673256	1.65992e-14	2.87458e-13	MAP3K1	protein_coding	mitogen-activated protein kinase kinase kinase 1 [Source:HGNC Symbol;Acc:HGNC:6848]
ENSG00000183696	956.447	913.954	898.618	593	648.025	634.846	923.007	625.29	0.563257	1.69662e-14	2.93506e-13	UPP1	protein_coding	uridine phosphorylase 1 [Source:HGNC Symbol;Acc:HGNC:12576]
ENSG00000121210	1004.64	1017.92	950.239	1326.47	1374.92	1386.15	990.93	1362.51	-0.45806	1.7087e-14	2.95288e-13	TMEM131L	protein_coding	transmembrane 131 like [Source:HGNC Symbol;Acc:HGNC:29146]
ENSG00000105197	2014.51	2009.61	2125.92	1613.64	1582.76	1473.75	2050.02	1556.71	0.396009	1.73104e-14	2.98834e-13	TIMM50	protein_coding	translocase of inner mitochondrial membrane 50 [Source:HGNC Symbol;Acc:HGNC:23656]
ENSG00000179958	2050.13	1996.96	1973.17	1510.51	1611.54	1434.59	2006.75	1518.88	0.402222	1.74091e-14	3.00225e-13	DCTPP1	protein_coding	dCTP pyrophosphatase 1 [Source:HGNC Symbol;Acc:HGNC:28777]
ENSG00000168538	669.408	651.791	681.601	954.846	942.195	1030.59	667.6	975.878	-0.548098	1.77588e-14	3.05936e-13	TRAPPC11	protein_coding	trafficking protein particle complex 11 [Source:HGNC Symbol;Acc:HGNC:25751]
ENSG00000137699	676.741	614.727	679.494	376.071	438.057	397.809	656.988	403.979	0.702688	1.82923e-14	3.14799e-13	TRIM29	protein_coding	tripartite motif containing 29 [Source:HGNC Symbol;Acc:HGNC:17274]
ENSG00000164187	879.973	871.466	878.602	1210.89	1236.36	1196.52	876.68	1214.59	-0.470355	1.85127e-14	3.1826e-13	LMBRD2	protein_coding	LMBR1 domain containing 2 [Source:HGNC Symbol;Acc:HGNC:25287]
ENSG00000008324	122.568	129.273	96.9201	256.048	269.655	257.648	116.254	261.117	-1.16314	1.86351e-14	3.20032e-13	SS18L2	protein_coding	SS18 like 2 [Source:HGNC Symbol;Acc:HGNC:15593]
ENSG00000112473	4305.58	4281.39	4339.28	3621.13	3648.34	3477.22	4308.75	3582.23	0.266144	1.87195e-14	3.21148e-13	SLC39A7	protein_coding	solute carrier family 39 member 7 [Source:HGNC Symbol;Acc:HGNC:4927]
ENSG00000117139	2548.78	2498.68	2524.14	3079.69	3141	3088.69	2523.87	3103.13	-0.298111	1.94191e-14	3.32805e-13	KDM5B	protein_coding	lysine demethylase 5B [Source:HGNC Symbol;Acc:HGNC:18039]
ENSG00000091592	2831.63	2614.4	2686.37	2139.96	2168.97	2114.78	2710.8	2141.23	0.339694	1.94413e-14	3.32838e-13	NLRP1	protein_coding	NLR family pyrin domain containing 1 [Source:HGNC Symbol;Acc:HGNC:14374]
ENSG00000205413	1017.21	1056.79	1077.71	1375.37	1453.79	1488.18	1050.57	1439.11	-0.452944	1.94908e-14	3.33341e-13	SAMD9	protein_coding	sterile alpha motif domain containing 9 [Source:HGNC Symbol;Acc:HGNC:1348]
ENSG00000136982	2056.41	2061.14	1999.5	1586.08	1571.04	1596.39	2039.02	1584.5	0.364027	2.01128e-14	3.43624e-13	DSCC1	protein_coding	DNA replication and sister chromatid cohesion 1 [Source:HGNC Symbol;Acc:HGNC:24453]
ENSG00000198888	25157.8	24837.7	25350.9	21841.4	22534.9	22877.1	25115.5	22417.8	0.164083	2.07377e-14	3.53577e-13	MT-ND1	protein_coding	mitochondrially encoded NADH:ubiquinone oxidoreductase core subunit 1 [Source:HGNC Symbol;Acc:HGNC:7455]
ENSG00000005102	469.319	387.82	435.087	223.153	245.141	232.914	430.742	233.736	0.881663	2.07382e-14	3.53577e-13	MEOX1	protein_coding	mesenchyme homeobox 1 [Source:HGNC Symbol;Acc:HGNC:7013]
ENSG00000142089	21757.3	20846.5	21834.4	19023.1	19021.9	19224.7	21479.4	19089.9	0.169895	2.07908e-14	3.54108e-13	IFITM3	protein_coding	interferon induced transmembrane protein 3 [Source:HGNC Symbol;Acc:HGNC:5414]
ENSG00000163872	2054.32	2007.81	2018.47	2530.25	2597.43	2510.53	2026.86	2546.07	-0.329021	2.1862e-14	3.71968e-13	YEATS2	protein_coding	YEATS domain containing 2 [Source:HGNC Symbol;Acc:HGNC:25489]
ENSG00000127922	1095.78	977.235	1166.2	1554.96	1535.86	1466.53	1079.74	1519.12	-0.494902	2.18844e-14	3.71968e-13	SEM1	protein_coding	SEM1, 26S proteasome complex subunit [Source:HGNC Symbol;Acc:HGNC:10845]
ENSG00000152409	823.404	823.553	772.201	1142.44	1129.78	1132.62	806.386	1134.95	-0.49262	2.24524e-14	3.81229e-13	JMY	protein_coding	junction mediating and regulatory protein, p53 cofactor [Source:HGNC Symbol;Acc:HGNC:28916]
ENSG00000175756	3096.67	2995.89	3236.29	2539.14	2464.2	2456.94	3109.62	2486.76	0.321282	2.32465e-14	3.94308e-13	AURKAIP1	protein_coding	aurora kinase A interacting protein 1 [Source:HGNC Symbol;Acc:HGNC:24114]
ENSG00000106105	3801.69	3879.11	3937.91	3243.28	3098.37	3222.67	3872.9	3188.1	0.280212	2.36363e-14	4.00508e-13	GARS	protein_coding	glycyl-tRNA synthetase [Source:HGNC Symbol;Acc:HGNC:4162]
ENSG00000140006	497.604	510.766	488.815	793.927	759.938	731.721	499.061	761.862	-0.610535	2.46706e-14	4.17605e-13	WDR89	protein_coding	WD repeat domain 89 [Source:HGNC Symbol;Acc:HGNC:20489]
ENSG00000069482	1335.67	1289.12	1246.27	907.726	961.38	929.595	1290.35	932.9	0.468869	2.47318e-14	4.18213e-13	GAL	protein_coding	galanin and GMAP prepropeptide [Source:HGNC Symbol;Acc:HGNC:4114]
ENSG00000109436	3198.28	3142.34	3181.51	2495.58	2496.18	2673.36	3174.04	2555.04	0.313176	2.5286e-14	4.27148e-13	TBC1D9	protein_coding	TBC1 domain family member 9 [Source:HGNC Symbol;Acc:HGNC:21710]
ENSG00000118898	5326.98	5238.74	5285.31	6374.53	6180.75	6062.98	5283.68	6206.09	-0.232783	2.59806e-14	4.38432e-13	PPL	protein_coding	periplakin [Source:HGNC Symbol;Acc:HGNC:9273]
ENSG00000196262	48941.2	47820.3	50084.5	44068.7	44162.7	44392.8	48948.7	44208.1	0.146849	2.74746e-14	4.63171e-13	PPIA	protein_coding	peptidylprolyl isomerase A [Source:HGNC Symbol;Acc:HGNC:9253]
ENSG00000111335	3402.56	3661.24	3576.56	4266.58	4275.05	4373.84	3546.79	4305.16	-0.278792	2.76166e-14	4.6509e-13	OAS2	protein_coding	2'-5'-oligoadenylate synthetase 2 [Source:HGNC Symbol;Acc:HGNC:8087]
ENSG00000113580	1023.49	1134.53	1151.45	1531.84	1455.93	1578.87	1103.16	1522.21	-0.464221	3.007e-14	5.05892e-13	NR3C1	protein_coding	nuclear receptor subfamily 3 group C member 1 [Source:HGNC Symbol;Acc:HGNC:7978]
ENSG00000100167	305.895	321.828	312.883	172.477	149.216	145.314	313.536	155.669	1.00698	3.03565e-14	5.10192e-13	2021-09-03	protein_coding	septin 3 [Source:HGNC Symbol;Acc:HGNC:10750]
ENSG00000264364	4508.82	4479.37	4652.17	3772.26	3817.81	3835.87	4546.78	3808.65	0.255484	3.08809e-14	5.18479e-13	DYNLL2	protein_coding	dynein light chain LC8-type 2 [Source:HGNC Symbol;Acc:HGNC:24596]
ENSG00000174238	3225.52	3089	3198.36	2528.48	2627.27	2553.81	3170.96	2569.85	0.303204	3.12527e-14	5.24189e-13	PITPNA	protein_coding	phosphatidylinositol transfer protein alpha [Source:HGNC Symbol;Acc:HGNC:9001]
ENSG00000104805	4373.68	4519.15	4553.14	3712.7	3827.4	3648.3	4481.99	3729.47	0.265529	3.21747e-14	5.39106e-13	NUCB1	protein_coding	nucleobindin 1 [Source:HGNC Symbol;Acc:HGNC:8043]
ENSG00000111181	146.662	167.242	146.434	54.2324	50.0941	53.5909	153.446	52.6391	1.54375	3.36306e-14	5.6293e-13	SLC6A12	protein_coding	solute carrier family 6 member 12 [Source:HGNC Symbol;Acc:HGNC:11045]
ENSG00000172270	11082.4	10912.3	11024.7	9890.75	9556.24	9493.83	11006.5	9646.94	0.189654	3.45429e-14	5.77615e-13	BSG	protein_coding	basigin (Ok blood group) [Source:HGNC Symbol;Acc:HGNC:1116]
ENSG00000170004	5838.2	5888.72	5747.79	6691.93	6774.42	6801.92	5824.9	6756.09	-0.213532	3.59739e-14	6.00936e-13	CHD3	protein_coding	chromodomain helicase DNA binding protein 3 [Source:HGNC Symbol;Acc:HGNC:1918]
ENSG00000172725	2058.51	1868.59	2044.8	2556.04	2551.6	2524.95	1990.63	2544.2	-0.355392	3.65545e-14	6.10016e-13	CORO1B	protein_coding	coronin 1B [Source:HGNC Symbol;Acc:HGNC:2253]
ENSG00000149485	1961.08	1979.78	2083.78	1607.41	1502.82	1458.29	2008.22	1522.84	0.397568	3.78266e-14	6.30609e-13	FADS1	protein_coding	fatty acid desaturase 1 [Source:HGNC Symbol;Acc:HGNC:3574]
ENSG00000115091	3600.56	3579.88	3687.18	4270.14	4357.12	4361.47	3622.54	4329.58	-0.257205	4.17132e-14	6.94701e-13	ACTR3	protein_coding	ARP3 actin related protein 3 homolog [Source:HGNC Symbol;Acc:HGNC:170]
ENSG00000261324	72.2835	55.1446	84.2784	184.924	174.796	218.486	70.5688	192.735	-1.4565	4.21581e-14	7.01403e-13	AC010168.2	sense_overlapping	novel transcript, overlapping HIST4H4
ENSG00000111962	1082.16	1160.75	1087.19	749.474	745.016	827.567	1110.03	774.019	0.521634	4.26871e-14	7.09491e-13	UST	protein_coding	uronyl 2-sulfotransferase [Source:HGNC Symbol;Acc:HGNC:17223]
ENSG00000213753	516.461	564.102	538.328	319.171	326.144	334.943	539.63	326.753	0.725421	4.28325e-14	7.11192e-13	CENPBD1P1	transcribed_processed_pseudogene	CENPB DNA-binding domains containing 1 pseudogene 1 [Source:HGNC Symbol;Acc:HGNC:28421]
ENSG00000151725	360.37	356.18	333.953	563.662	571.285	569.918	350.168	568.288	-0.697804	4.3737e-14	7.2548e-13	CENPU	protein_coding	centromere protein U [Source:HGNC Symbol;Acc:HGNC:21348]
ENSG00000154978	1140.82	1132.72	1191.49	1560.29	1609.41	1490.24	1155.01	1553.31	-0.427873	4.51658e-14	7.4843e-13	VOPP1	protein_coding	VOPP1, WBP1/VOPP1 family member [Source:HGNC Symbol;Acc:HGNC:34518]
ENSG00000128268	1183.77	1105.6	1212.56	793.038	849.467	833.75	1167.31	825.419	0.500066	4.72414e-14	7.82039e-13	MGAT3	protein_coding	mannosyl (beta-1,4-)-glycoprotein beta-1,4-N-acetylglucosaminyltransferase [Source:HGNC Symbol;Acc:HGNC:7046]
ENSG00000106608	1743.19	1662.47	1822.52	1350.48	1254.48	1298.55	1742.73	1301.17	0.419575	4.82835e-14	7.9849e-13	URGCP	protein_coding	upregulator of cell proliferation [Source:HGNC Symbol;Acc:HGNC:30890]
ENSG00000073331	675.694	679.816	663.692	934.398	966.709	1029.56	673.067	976.89	-0.536307	5.00063e-14	8.26154e-13	ALPK1	protein_coding	alpha kinase 1 [Source:HGNC Symbol;Acc:HGNC:20917]
ENSG00000132436	597.125	630.095	560.451	864.163	916.615	878.066	595.89	886.281	-0.57045	5.04208e-14	8.32171e-13	FIGNL1	protein_coding	fidgetin like 1 [Source:HGNC Symbol;Acc:HGNC:13286]
ENSG00000184983	1093.68	1043.23	1104.05	763.699	656.552	782.221	1080.32	734.157	0.555189	5.08457e-14	8.38345e-13	NDUFA6	protein_coding	NADH:ubiquinone oxidoreductase subunit A6 [Source:HGNC Symbol;Acc:HGNC:7690]
ENSG00000141279	1220.44	1203.24	1179.9	1619.86	1565.71	1586.08	1201.19	1590.55	-0.405482	5.36872e-14	8.84312e-13	NPEPPS	protein_coding	aminopeptidase puromycin sensitive [Source:HGNC Symbol;Acc:HGNC:7900]
ENSG00000136143	1029.78	1100.18	1163.04	738.806	787.649	767.792	1097.67	764.749	0.522399	5.43522e-14	8.94375e-13	SUCLA2	protein_coding	succinate-CoA ligase ADP-forming beta subunit [Source:HGNC Symbol;Acc:HGNC:11448]
ENSG00000172062	194.851	166.338	162.236	380.516	403.95	297.842	174.475	360.769	-1.04959	5.60224e-14	9.20941e-13	SMN1	protein_coding	survival of motor neuron 1, telomeric [Source:HGNC Symbol;Acc:HGNC:11117]
ENSG00000129636	1961.08	1923.73	1976.33	1509.62	1517.74	1528.37	1953.72	1518.58	0.3633	5.78406e-14	9.49885e-13	ITFG1	protein_coding	integrin alpha FG-GAP repeat containing 1 [Source:HGNC Symbol;Acc:HGNC:30697]
ENSG00000088986	2611.64	2655.98	2610.52	3277.06	3164.45	3196.9	2626.05	3212.8	-0.291149	5.83067e-14	9.56589e-13	DYNLL1	protein_coding	dynein light chain LC8-type 1 [Source:HGNC Symbol;Acc:HGNC:15476]
ENSG00000124006	5890.58	5510.85	5430.69	6891.07	6682.76	6539.12	5610.71	6704.32	-0.2575	6.01547e-14	9.85929e-13	OBSL1	protein_coding	obscurin like 1 [Source:HGNC Symbol;Acc:HGNC:29092]
ENSG00000145703	769.977	784.681	699.511	1035.75	1091.41	1124.38	751.389	1083.85	-0.526476	6.2904e-14	1.02997e-12	IQGAP2	protein_coding	IQ motif containing GTPase activating protein 2 [Source:HGNC Symbol;Acc:HGNC:6111]
ENSG00000023041	283.896	319.116	323.418	551.215	533.981	487.471	308.81	524.222	-0.763492	6.38194e-14	1.04392e-12	ZDHHC6	protein_coding	zinc finger DHHC-type containing 6 [Source:HGNC Symbol;Acc:HGNC:19160]
ENSG00000173473	2287.93	2268.16	2311.33	2726.74	2955.55	2991.81	2289.14	2891.37	-0.336075	6.53348e-14	1.06765e-12	SMARCC1	protein_coding	SWI/SNF related, matrix associated, actin dependent regulator of chromatin subfamily c member 1 [Source:HGNC Symbol;Acc:HGNC:11104]
ENSG00000159166	5742.87	5663.62	5796.25	4958.27	4906.02	4833.48	5734.25	4899.26	0.226553	6.65986e-14	1.08723e-12	LAD1	protein_coding	ladinin 1 [Source:HGNC Symbol;Acc:HGNC:6472]
ENSG00000154511	140.377	146.45	173.824	351.177	280.314	323.606	153.55	318.366	-1.05571	6.68577e-14	1.09038e-12	FAM69A	protein_coding	family with sequence similarity 69 member A [Source:HGNC Symbol;Acc:HGNC:32213]
ENSG00000103260	2440.88	2128.04	2134.35	1753.22	1600.88	1566.5	2234.42	1640.2	0.444247	7.00543e-14	1.14139e-12	METRN	protein_coding	meteorin, glial cell differentiation regulator [Source:HGNC Symbol;Acc:HGNC:14151]
ENSG00000132773	559.412	597.551	587.842	362.735	354.922	368.953	581.601	362.203	0.683642	7.23125e-14	1.17702e-12	TOE1	protein_coding	target of EGR1, exonuclease [Source:HGNC Symbol;Acc:HGNC:15954]
ENSG00000173065	1333.58	1349.69	1205.18	867.719	925.141	963.605	1296.15	918.822	0.498449	7.37332e-14	1.19896e-12	FAM222B	protein_coding	family with sequence similarity 222 member B [Source:HGNC Symbol;Acc:HGNC:25563]
ENSG00000122140	1560.91	1525.07	1489.62	1138.88	1147.9	1154.26	1525.2	1147.02	0.411323	7.80629e-14	1.26812e-12	MRPS2	protein_coding	mitochondrial ribosomal protein S2 [Source:HGNC Symbol;Acc:HGNC:14495]
ENSG00000180370	3308.28	3316.81	3238.4	3834.5	4082.13	4072.91	3287.83	3996.51	-0.280614	8.14725e-14	1.32221e-12	PAK2	protein_coding	p21 (RAC1) activated kinase 2 [Source:HGNC Symbol;Acc:HGNC:8591]
ENSG00000134444	1158.63	1149	1165.15	1477.61	1620.06	1567.53	1157.59	1555.07	-0.424841	8.30086e-14	1.34581e-12	RELCH	protein_coding	RAB11 binding and LisH domain, coiled-coil and HEAT repeat containing [Source:HGNC Symbol;Acc:HGNC:29289]
ENSG00000145425	9084.68	9176.61	9522.4	10658	10639.1	10453.3	9261.23	10583.5	-0.192777	8.42386e-14	1.36442e-12	RPS3A	protein_coding	ribosomal protein S3A [Source:HGNC Symbol;Acc:HGNC:10421]
ENSG00000186648	323.704	311.884	337.114	179.589	149.216	165.926	324.234	164.91	0.971116	8.62889e-14	1.39626e-12	CARMIL3	protein_coding	capping protein regulator and myosin 1 linker 3 [Source:HGNC Symbol;Acc:HGNC:20272]
ENSG00000171724	310.086	301.035	331.846	150.25	149.216	175.201	314.322	158.223	0.990562	8.97464e-14	1.45078e-12	VAT1L	protein_coding	vesicle amine transport 1 like [Source:HGNC Symbol;Acc:HGNC:29315]
ENSG00000049245	931.305	1015.2	961.827	1265.13	1471.91	1375.84	969.445	1370.96	-0.497373	9.6924e-14	1.56528e-12	VAMP3	protein_coding	vesicle associated membrane protein 3 [Source:HGNC Symbol;Acc:HGNC:12644]
ENSG00000213918	674.646	669.872	680.548	953.068	994.42	949.177	675.022	965.555	-0.516205	1.0162e-13	1.63952e-12	DNASE1	protein_coding	deoxyribonuclease 1 [Source:HGNC Symbol;Acc:HGNC:2956]
ENSG00000164542	433.701	396.861	436.141	643.677	653.354	684.314	422.234	660.448	-0.646667	1.03415e-13	1.66685e-12	KIAA0895	protein_coding	KIAA0895 [Source:HGNC Symbol;Acc:HGNC:22206]
ENSG00000108639	6032.01	5721.48	5764.64	5019.61	4935.86	4908.72	5839.38	4954.73	0.236414	1.05142e-13	1.69303e-12	SYNGR2	protein_coding	synaptogyrin 2 [Source:HGNC Symbol;Acc:HGNC:11499]
ENSG00000147416	1424.72	1394.89	1498.05	1899.02	1856.68	1856.1	1439.22	1870.6	-0.379375	1.05505e-13	1.69722e-12	ATP6V1B2	protein_coding	ATPase H+ transporting V1 subunit B2 [Source:HGNC Symbol;Acc:HGNC:854]
ENSG00000204682	767.881	694.28	718.473	1030.42	1054.11	1021.32	726.878	1035.28	-0.511235	1.1321e-13	1.8194e-12	CASC10	protein_coding	cancer susceptibility 10 [Source:HGNC Symbol;Acc:HGNC:31448]
ENSG00000086475	1634.24	1595.58	1684.51	1250.01	1226.77	1252.17	1638.11	1242.99	0.397409	1.16693e-13	1.87356e-12	SEPHS1	protein_coding	selenophosphate synthetase 1 [Source:HGNC Symbol;Acc:HGNC:19685]
ENSG00000148773	2479.64	2629.77	2513.6	3113.47	3268.9	3080.44	2541	3154.27	-0.310776	1.18663e-13	1.90332e-12	MKI67	protein_coding	marker of proliferation Ki-67 [Source:HGNC Symbol;Acc:HGNC:7107]
ENSG00000139211	1803.95	1862.26	1870.98	2344.44	2292.6	2337.39	1845.73	2324.81	-0.332961	1.21378e-13	1.94499e-12	AMIGO2	protein_coding	adhesion molecule with Ig like domain 2 [Source:HGNC Symbol;Acc:HGNC:24073]
ENSG00000172380	1819.66	1893.9	1799.34	1346.03	1448.46	1421.19	1837.63	1405.23	0.388862	1.23457e-13	1.97638e-12	GNG12	protein_coding	G protein subunit gamma 12 [Source:HGNC Symbol;Acc:HGNC:19663]
ENSG00000147155	851.688	812.705	777.468	543.213	568.088	519.419	813.954	543.573	0.582778	1.25562e-13	2.00813e-12	EBP	protein_coding	EBP, cholestenol delta-isomerase [Source:HGNC Symbol;Acc:HGNC:3133]
ENSG00000122406	7253.49	7295.36	7572.41	8841.66	8486.15	8382.85	7373.76	8570.22	-0.217556	1.25829e-13	2.01018e-12	RPL5	protein_coding	ribosomal protein L5 [Source:HGNC Symbol;Acc:HGNC:10360]
ENSG00000171928	948.067	927.515	926.009	650.789	667.21	631.754	933.863	649.918	0.522946	1.25933e-13	2.01018e-12	TVP23B	protein_coding	trans-golgi network vesicle protein 23 homolog B [Source:HGNC Symbol;Acc:HGNC:20399]
ENSG00000103160	395.988	372.452	410.857	630.341	676.803	586.408	393.099	631.184	-0.684276	1.26207e-13	2.01261e-12	HSDL1	protein_coding	hydroxysteroid dehydrogenase like 1 [Source:HGNC Symbol;Acc:HGNC:16475]
ENSG00000100380	3405.71	3415.35	3626.08	2899.21	2765.83	2830.01	3482.38	2831.68	0.297439	1.30658e-13	2.08158e-12	ST13	protein_coding	ST13, Hsp70 interacting protein [Source:HGNC Symbol;Acc:HGNC:11343]
ENSG00000122034	630.648	698.8	655.264	428.525	431.662	411.207	661.571	423.798	0.643518	1.31934e-13	2.09989e-12	GTF3A	protein_coding	general transcription factor IIIA [Source:HGNC Symbol;Acc:HGNC:4662]
ENSG00000140836	1573.48	1497.04	1487.51	1081.09	1095.67	1193.43	1519.34	1123.4	0.436068	1.40742e-13	2.23792e-12	ZFHX3	protein_coding	zinc finger homeobox 3 [Source:HGNC Symbol;Acc:HGNC:777]
ENSG00000116016	3574.37	3729.95	3603.95	4274.58	4368.84	4401.67	3636.09	4348.36	-0.257181	1.42092e-13	2.25721e-12	EPAS1	protein_coding	endothelial PAS domain protein 1 [Source:HGNC Symbol;Acc:HGNC:3374]
ENSG00000157637	2280.6	2296.19	2070.09	2760.52	2787.15	2988.72	2215.62	2845.46	-0.359887	1.46081e-13	2.31834e-12	SLC38A10	protein_coding	solute carrier family 38 member 10 [Source:HGNC Symbol;Acc:HGNC:28237]
ENSG00000148730	6291.81	6303.66	5964.8	5289.88	5251.35	5275.61	6186.76	5272.28	0.23101	1.47921e-13	2.34531e-12	EIF4EBP2	protein_coding	eukaryotic translation initiation factor 4E binding protein 2 [Source:HGNC Symbol;Acc:HGNC:3289]
ENSG00000177971	236.755	193.458	230.712	379.627	423.135	409.146	220.308	403.969	-0.876917	1.52225e-13	2.41123e-12	IMP3	protein_coding	IMP3, U3 small nucleolar ribonucleoprotein [Source:HGNC Symbol;Acc:HGNC:14497]
ENSG00000090674	1234.06	1207.76	1193.59	890.834	907.022	809.016	1211.8	868.958	0.479367	1.53078e-13	2.42242e-12	MCOLN1	protein_coding	mucolipin 1 [Source:HGNC Symbol;Acc:HGNC:13356]
ENSG00000238105	625.41	634.615	606.804	391.185	381.568	415.329	622.276	396.027	0.652519	1.54473e-13	2.44215e-12	GOLGA2P5	transcribed_unprocessed_pseudogene	GOLGA2 pseudogene 5 [Source:HGNC Symbol;Acc:HGNC:25315]
ENSG00000163541	1816.52	1776.38	1893.1	1375.37	1430.35	1406.76	1828.67	1404.16	0.381079	1.58343e-13	2.50095e-12	SUCLG1	protein_coding	succinate-CoA ligase alpha subunit [Source:HGNC Symbol;Acc:HGNC:11449]
ENSG00000167595	314.276	294.707	320.258	498.76	511.599	524.572	309.747	511.644	-0.725003	1.59363e-13	2.51465e-12	PROSER3	protein_coding	proline and serine rich 3 [Source:HGNC Symbol;Acc:HGNC:25204]
ENSG00000156973	457.796	503.534	460.371	268.495	301.63	233.945	473.9	268.023	0.824099	1.62567e-13	2.56275e-12	PDE6D	protein_coding	phosphodiesterase 6D [Source:HGNC Symbol;Acc:HGNC:8788]
ENSG00000115267	1684.52	1680.56	1723.49	1295.35	1277.93	1325.34	1696.19	1299.54	0.384057	1.6578e-13	2.61092e-12	IFIH1	protein_coding	interferon induced with helicase C domain 1 [Source:HGNC Symbol;Acc:HGNC:18873]
ENSG00000080345	1743.19	1847.8	1781.43	2249.31	2254.23	2302.35	1790.81	2268.63	-0.340281	1.73278e-13	2.7264e-12	RIF1	protein_coding	replication timing regulatory factor 1 [Source:HGNC Symbol;Acc:HGNC:23207]
ENSG00000162704	2690.2	2536.65	2765.38	3331.29	3277.43	3252.55	2664.08	3287.09	-0.304448	1.77342e-13	2.78769e-12	ARPC5	protein_coding	actin related protein 2/3 complex subunit 5 [Source:HGNC Symbol;Acc:HGNC:708]
ENSG00000203879	3124.95	3139.63	3039.29	2518.7	2368.28	2594	3101.29	2493.66	0.314385	1.78676e-13	2.806e-12	GDI1	protein_coding	GDP dissociation inhibitor 1 [Source:HGNC Symbol;Acc:HGNC:4226]
ENSG00000163528	677.789	676.2	657.371	411.633	401.818	468.92	670.453	427.457	0.65017	1.81187e-13	2.84273e-12	CHCHD4	protein_coding	coiled-coil-helix-coiled-coil-helix domain containing 4 [Source:HGNC Symbol;Acc:HGNC:26467]
ENSG00000165637	6782.08	6822.57	6832.87	5914	5971.85	5856.86	6812.51	5914.24	0.204067	1.84809e-13	2.89681e-12	VDAC2	protein_coding	voltage dependent anion channel 2 [Source:HGNC Symbol;Acc:HGNC:12672]
ENSG00000143815	786.738	768.409	790.11	1073.98	1134.04	1070.79	781.752	1092.94	-0.483335	1.87836e-13	2.94146e-12	LBR	protein_coding	lamin B receptor [Source:HGNC Symbol;Acc:HGNC:6518]
ENSG00000088256	2508.97	2450.77	2318.71	1942.59	1904.64	1904.54	2426.15	1917.25	0.339521	1.8819e-13	2.94421e-12	GNA11	protein_coding	G protein subunit alpha 11 [Source:HGNC Symbol;Acc:HGNC:4379]
ENSG00000167767	3227.62	3102.56	3170.97	2585.38	2516.43	2644.5	3167.05	2582.1	0.294026	1.91632e-13	2.99522e-12	KRT80	protein_coding	keratin 80 [Source:HGNC Symbol;Acc:HGNC:27056]
ENSG00000134371	732.264	758.465	732.168	1037.53	1029.59	1053.27	740.966	1040.13	-0.488605	1.95959e-13	3.05996e-12	CDC73	protein_coding	cell division cycle 73 [Source:HGNC Symbol;Acc:HGNC:16783]
ENSG00000178445	1382.82	1361.44	1267.34	1004.63	952.853	977.003	1337.2	978.163	0.450646	2.11544e-13	3.30021e-12	GLDC	protein_coding	glycine decarboxylase [Source:HGNC Symbol;Acc:HGNC:4313]
ENSG00000111727	120.473	127.465	131.685	265.828	251.536	268.985	126.541	262.116	-1.0509	2.17605e-13	3.39156e-12	HCFC2	protein_coding	host cell factor C2 [Source:HGNC Symbol;Acc:HGNC:24972]
ENSG00000150782	261.897	271.203	271.798	462.309	448.715	451.4	268.299	454.141	-0.759437	2.23197e-13	3.47544e-12	IL18	protein_coding	interleukin 18 [Source:HGNC Symbol;Acc:HGNC:5986]
ENSG00000162302	2625.25	2495.97	2491.48	1966.59	2076.24	2015.84	2537.57	2019.56	0.329852	2.27388e-13	3.53736e-12	RPS6KA4	protein_coding	ribosomal protein S6 kinase A4 [Source:HGNC Symbol;Acc:HGNC:10433]
ENSG00000161980	994.16	975.427	1020.82	677.461	736.489	684.314	996.803	699.421	0.511845	2.27816e-13	3.54069e-12	POLR3K	protein_coding	RNA polymerase III subunit K [Source:HGNC Symbol;Acc:HGNC:14121]
ENSG00000128626	1691.85	1624.51	1621.31	1291.8	1208.65	1241.87	1645.89	1247.44	0.398563	2.30842e-13	3.58434e-12	MRPS12	protein_coding	mitochondrial ribosomal protein S12 [Source:HGNC Symbol;Acc:HGNC:10380]
ENSG00000168303	546.841	494.494	520.419	780.591	798.308	756.456	520.584	778.452	-0.581799	2.44564e-13	3.79385e-12	MPLKIP	protein_coding	M-phase specific PLK1 interacting protein [Source:HGNC Symbol;Acc:HGNC:16002]
ENSG00000099901	2028.13	1977.07	1973.17	1589.63	1536.93	1554.14	1992.79	1560.23	0.352292	2.80355e-13	4.34497e-12	RANBP1	protein_coding	RAN binding protein 1 [Source:HGNC Symbol;Acc:HGNC:9847]
ENSG00000164211	701.883	734.056	695.297	428.525	400.753	508.083	710.412	445.787	0.67325	2.80663e-13	4.34567e-12	STARD4	protein_coding	StAR related lipid transfer domain containing 4 [Source:HGNC Symbol;Acc:HGNC:18058]
ENSG00000126934	3695.89	3499.42	3556.55	3013.01	2909.72	2922.76	3583.95	2948.5	0.280594	2.8559e-13	4.41782e-12	MAP2K2	protein_coding	mitogen-activated protein kinase kinase 2 [Source:HGNC Symbol;Acc:HGNC:6842]
ENSG00000147874	2280.6	2331.44	2343.99	1798.56	1862.01	1877.74	2318.68	1846.1	0.329614	3.21654e-13	4.97104e-12	HAUS6	protein_coding	HAUS augmin like complex subunit 6 [Source:HGNC Symbol;Acc:HGNC:25948]
ENSG00000165283	4351.68	4240.71	4418.29	3694.92	3597.18	3629.75	4336.89	3640.62	0.251655	3.23795e-13	4.99945e-12	STOML2	protein_coding	stomatin like 2 [Source:HGNC Symbol;Acc:HGNC:14559]
ENSG00000168209	4430.25	4273.26	4208.65	5160.08	5043.51	5042.69	4304.05	5082.1	-0.240161	3.28427e-13	5.06624e-12	DDIT4	protein_coding	DNA damage inducible transcript 4 [Source:HGNC Symbol;Acc:HGNC:24944]
ENSG00000115738	348.847	386.916	398.215	202.705	216.364	206.119	377.993	208.396	0.860568	3.32195e-13	5.11958e-12	ID2	protein_coding	inhibitor of DNA binding 2 [Source:HGNC Symbol;Acc:HGNC:5361]
ENSG00000184216	6647.99	6178.01	6218.69	5348.56	5330.22	5437.41	6348.23	5372.07	0.240548	3.35311e-13	5.16279e-12	IRAK1	protein_coding	interleukin 1 receptor associated kinase 1 [Source:HGNC Symbol;Acc:HGNC:6112]
ENSG00000285967	447.32	491.782	494.082	775.257	682.132	748.211	477.728	735.2	-0.622592	3.38327e-13	5.20437e-12	NIPBL-DT	bidirectional_promoter_lncRNA	NIPBL divergent transcript [Source:HGNC Symbol;Acc:HGNC:51293]
ENSG00000149084	1422.62	1507.89	1496.99	1050.86	1057.3	1163.54	1475.84	1090.57	0.43754	3.40818e-13	5.23782e-12	HSD17B12	protein_coding	hydroxysteroid 17-beta dehydrogenase 12 [Source:HGNC Symbol;Acc:HGNC:18646]
ENSG00000075407	390.75	442.061	424.552	245.379	240.878	231.884	419.121	239.38	0.808485	3.50855e-13	5.38706e-12	ZNF37A	protein_coding	zinc finger protein 37A [Source:HGNC Symbol;Acc:HGNC:13102]
ENSG00000155100	945.971	994.411	1046.11	1337.14	1373.86	1340.8	995.496	1350.6	-0.439902	3.5418e-13	5.43306e-12	OTUD6B	protein_coding	OTU domain containing 6B [Source:HGNC Symbol;Acc:HGNC:24281]
ENSG00000161813	1856.32	1876.73	1981.6	2367.56	2366.15	2513.62	1904.88	2415.77	-0.342867	3.5987e-13	5.51522e-12	LARP4	protein_coding	La ribonucleoprotein domain family member 4 [Source:HGNC Symbol;Acc:HGNC:24320]
ENSG00000006695	755.31	845.25	834.356	544.991	543.574	550.337	811.639	546.301	0.572007	3.92876e-13	6.01548e-12	COX10	protein_coding	cytochrome c oxidase assembly factor heme A:farnesyltransferase COX10 [Source:HGNC Symbol;Acc:HGNC:2260]
ENSG00000150938	13377.7	13598.1	13585.7	11820.9	12055.6	12247.6	13520.5	12041.4	0.167499	4.13803e-13	6.33004e-12	CRIM1	protein_coding	cysteine rich transmembrane BMP regulator 1 [Source:HGNC Symbol;Acc:HGNC:2359]
ENSG00000091483	1538.91	1569.36	1623.41	1240.23	1160.69	1169.72	1577.23	1190.22	0.404849	4.30625e-13	6.58127e-12	FH	protein_coding	fumarate hydratase [Source:HGNC Symbol;Acc:HGNC:3700]
ENSG00000198964	559.412	569.526	546.756	801.04	805.768	849.209	558.565	818.672	-0.550594	4.57314e-13	6.98271e-12	SGMS1	protein_coding	sphingomyelin synthase 1 [Source:HGNC Symbol;Acc:HGNC:29799]
ENSG00000153094	715.502	752.137	734.275	1019.75	1008.28	1063.57	733.971	1030.53	-0.488798	4.89756e-13	7.47116e-12	BCL2L11	protein_coding	BCL2 like 11 [Source:HGNC Symbol;Acc:HGNC:994]
ENSG00000234745	8481.27	8447.07	8815.52	7506.3	7450.16	7521.27	8581.29	7492.58	0.195414	4.94919e-13	7.54295e-12	HLA-B	protein_coding	major histocompatibility complex, class I, B [Source:HGNC Symbol;Acc:HGNC:4932]
ENSG00000122756	687.217	661.736	654.211	454.308	402.884	440.063	667.721	432.418	0.624793	5.09689e-13	7.7609e-12	CNTFR	protein_coding	ciliary neurotrophic factor receptor [Source:HGNC Symbol;Acc:HGNC:2170]
ENSG00000198832	1092.63	1096.56	1123.01	826.822	759.938	793.557	1104.07	793.439	0.475092	5.13645e-13	7.81393e-12	SELENOM	protein_coding	selenoprotein M [Source:HGNC Symbol;Acc:HGNC:30397]
ENSG00000113141	2434.59	2592.7	2591.56	3157.04	3044.01	3184.53	2539.62	3128.53	-0.300726	5.17529e-13	7.86578e-12	IK	protein_coding	IK cytokine [Source:HGNC Symbol;Acc:HGNC:5958]
ENSG00000189241	720.74	722.304	721.634	985.074	1058.37	1003.8	721.559	1015.75	-0.492453	5.33109e-13	8.09512e-12	TSPYL1	protein_coding	TSPY like 1 [Source:HGNC Symbol;Acc:HGNC:12382]
ENSG00000107020	1154.44	1116.45	1066.12	805.485	813.229	783.251	1112.34	800.655	0.474394	5.35859e-13	8.12941e-12	PLGRKT	protein_coding	plasminogen receptor with a C-terminal lysine [Source:HGNC Symbol;Acc:HGNC:23633]
ENSG00000105699	3769.22	3573.55	3547.07	2974.78	2979	3035.1	3629.95	2996.29	0.27662	5.64142e-13	8.55063e-12	LSR	protein_coding	lipolysis stimulated lipoprotein receptor [Source:HGNC Symbol;Acc:HGNC:29572]
ENSG00000166444	959.59	916.666	896.511	1270.46	1217.18	1289.27	924.256	1258.97	-0.446423	5.67539e-13	8.59423e-12	ST5	protein_coding	suppression of tumorigenicity 5 [Source:HGNC Symbol;Acc:HGNC:11350]
ENSG00000070214	1173.3	1120.97	1170.42	1490.95	1576.36	1514.97	1154.9	1527.43	-0.403446	5.9414e-13	8.98882e-12	SLC44A1	protein_coding	solute carrier family 44 member 1 [Source:HGNC Symbol;Acc:HGNC:18798]
ENSG00000162616	199.042	208.826	198.054	352.066	374.107	365.861	201.974	364.011	-0.847875	5.95503e-13	9.00119e-12	DNAJB4	protein_coding	DnaJ heat shock protein family (Hsp40) member B4 [Source:HGNC Symbol;Acc:HGNC:14886]
ENSG00000160712	895.687	898.586	865.96	1213.56	1212.92	1190.34	886.745	1205.6	-0.442889	6.10843e-13	9.22462e-12	IL6R	protein_coding	interleukin 6 receptor [Source:HGNC Symbol;Acc:HGNC:6019]
ENSG00000139180	416.94	460.141	417.178	270.273	232.351	234.975	431.42	245.867	0.809362	6.14595e-13	9.2728e-12	NDUFA9	protein_coding	NADH:ubiquinone oxidoreductase subunit A9 [Source:HGNC Symbol;Acc:HGNC:7693]
ENSG00000113269	1005.68	1032.38	1061.91	764.588	711.975	728.63	1033.32	735.064	0.490031	6.21317e-13	9.36567e-12	RNF130	protein_coding	ring finger protein 130 [Source:HGNC Symbol;Acc:HGNC:18280]
ENSG00000174780	2626.3	2761.75	2814.9	3374.86	3365.89	3274.2	2734.32	3338.32	-0.287915	6.25125e-13	9.41448e-12	SRP72	protein_coding	signal recognition particle 72 [Source:HGNC Symbol;Acc:HGNC:11303]
ENSG00000168118	350.942	337.196	368.718	589.444	574.483	530.756	352.285	564.894	-0.683319	6.32493e-13	9.51677e-12	RAB4A	protein_coding	RAB4A, member RAS oncogene family [Source:HGNC Symbol;Acc:HGNC:9781]
ENSG00000162368	3079.91	3073.63	3087.75	2512.47	2502.57	2587.82	3080.43	2534.29	0.28164	6.33749e-13	9.527e-12	CMPK1	protein_coding	cytidine/uridine monophosphate kinase 1 [Source:HGNC Symbol;Acc:HGNC:18170]
ENSG00000132376	675.694	662.64	594.163	926.396	956.051	915.167	644.165	932.538	-0.532658	6.6894e-13	1.00469e-11	INPP5K	protein_coding	inositol polyphosphate-5-phosphatase K [Source:HGNC Symbol;Acc:HGNC:33882]
ENSG00000267475	307.991	296.515	287.6	475.645	479.624	520.45	297.369	491.906	-0.725604	7.00765e-13	1.05153e-11	AC008736.1	lincRNA	novel transcript
ENSG00000020577	1182.73	1204.14	1204.13	1585.19	1534.8	1575.78	1197	1565.25	-0.387207	7.06159e-13	1.05866e-11	SAMD4A	protein_coding	sterile alpha motif domain containing 4A [Source:HGNC Symbol;Acc:HGNC:23023]
ENSG00000112984	1525.29	1716.72	1588.65	2059.05	2055.99	2238.45	1610.22	2117.83	-0.393718	7.07562e-13	1.0598e-11	KIF20A	protein_coding	kinesin family member 20A [Source:HGNC Symbol;Acc:HGNC:9787]
ENSG00000135070	1014.06	974.523	999.752	737.917	659.749	702.865	996.113	700.177	0.506371	7.31815e-13	1.09514e-11	ISCA1	protein_coding	iron-sulfur cluster assembly 1 [Source:HGNC Symbol;Acc:HGNC:28660]
ENSG00000163121	359.322	316.404	323.418	188.48	152.414	178.293	333.048	173.062	0.940083	7.34045e-13	1.09748e-11	NEURL3	protein_coding	neuralized E3 ubiquitin protein ligase 3 [Source:HGNC Symbol;Acc:HGNC:25162]
ENSG00000071082	11397.7	11301	12297.3	13841.7	13666.1	13206	11665.4	13571.3	-0.21876	7.35193e-13	1.0982e-11	RPL31	protein_coding	ribosomal protein L31 [Source:HGNC Symbol;Acc:HGNC:10334]
ENSG00000095637	690.36	788.297	674.227	1022.41	1005.08	1130.56	717.628	1052.68	-0.550272	7.58442e-13	1.13191e-11	SORBS1	protein_coding	sorbin and SH3 domain containing 1 [Source:HGNC Symbol;Acc:HGNC:14565]
ENSG00000138413	5555.36	5640.12	5638.22	4858.69	4720.57	4877.8	5611.23	4819.02	0.219399	7.87088e-13	1.1736e-11	IDH1	protein_coding	isocitrate dehydrogenase (NADP(+)) 1, cytosolic [Source:HGNC Symbol;Acc:HGNC:5382]
ENSG00000101367	3788.08	3683.84	3878.91	3152.59	3194.3	3087.66	3783.61	3144.85	0.266278	7.95937e-13	1.18572e-11	MAPRE1	protein_coding	microtubule associated protein RP/EB family member 1 [Source:HGNC Symbol;Acc:HGNC:6890]
ENSG00000084731	684.075	636.423	694.243	429.414	451.912	436.972	671.58	439.433	0.611596	8.22461e-13	1.22413e-11	KIF3C	protein_coding	kinesin family member 3C [Source:HGNC Symbol;Acc:HGNC:6321]
ENSG00000065029	430.558	383.3	420.338	620.561	633.104	661.641	411.399	638.435	-0.635399	8.4625e-13	1.25841e-11	ZNF76	protein_coding	zinc finger protein 76 [Source:HGNC Symbol;Acc:HGNC:13149]
ENSG00000108828	3372.18	3387.33	3371.14	2802.3	2826.58	2804.25	3376.88	2811.04	0.264761	8.57632e-13	1.27419e-11	VAT1	protein_coding	vesicle amine transport 1 [Source:HGNC Symbol;Acc:HGNC:16919]
ENSG00000185818	2391.64	2158.78	2224.95	1733.66	1741.57	1810.75	2258.46	1761.99	0.357638	9.57837e-13	1.42178e-11	NAT8L	protein_coding	N-acetyltransferase 8 like [Source:HGNC Symbol;Acc:HGNC:26742]
ENSG00000083845	8489.65	8640.53	8654.34	7660.11	7557.81	7306.91	8594.84	7508.27	0.194751	1.01097e-12	1.4993e-11	RPS5	protein_coding	ribosomal protein S5 [Source:HGNC Symbol;Acc:HGNC:10426]
ENSG00000169710	32236.4	29431.9	27748.7	21608.5	21511.7	22171.2	29805.6	21763.8	0.453652	1.05011e-12	1.55596e-11	FASN	protein_coding	fatty acid synthase [Source:HGNC Symbol;Acc:HGNC:3594]
ENSG00000123485	702.931	705.128	761.666	985.963	1010.41	1148.08	723.242	1048.15	-0.53504	1.05509e-12	1.56193e-11	HJURP	protein_coding	Holliday junction recognition protein [Source:HGNC Symbol;Acc:HGNC:25444]
ENSG00000101974	2380.12	2296.19	2313.44	1914.14	1822.57	1839.61	2329.92	1858.77	0.324803	1.08061e-12	1.59827e-11	ATP11C	protein_coding	ATPase phospholipid transporting 11C [Source:HGNC Symbol;Acc:HGNC:13554]
ENSG00000055332	3951.5	4045.45	4046.42	3227.27	3349.91	3457.64	4014.45	3344.94	0.264083	1.10268e-12	1.62946e-11	EIF2AK2	protein_coding	eukaryotic translation initiation factor 2 alpha kinase 2 [Source:HGNC Symbol;Acc:HGNC:9437]
ENSG00000163545	1246.63	1280.08	1262.07	893.501	945.392	963.605	1262.93	934.166	0.436529	1.10962e-12	1.63825e-11	NUAK2	protein_coding	NUAK family kinase 2 [Source:HGNC Symbol;Acc:HGNC:29558]
ENSG00000065361	4200.83	4189.18	4241.31	4894.25	4880.44	5009.72	4210.44	4928.14	-0.2271	1.12027e-12	1.6525e-11	ERBB3	protein_coding	erb-b2 receptor tyrosine kinase 3 [Source:HGNC Symbol;Acc:HGNC:3431]
ENSG00000105649	237.802	224.195	212.803	96.9071	110.846	103.059	224.933	103.604	1.12107	1.12725e-12	1.66131e-11	RAB3A	protein_coding	RAB3A, member RAS oncogene family [Source:HGNC Symbol;Acc:HGNC:9777]
ENSG00000162591	3207.71	2914.53	2838.07	3677.14	3660.06	3767.85	2986.77	3701.68	-0.30991	1.15876e-12	1.70623e-11	MEGF6	protein_coding	multiple EGF like domains 6 [Source:HGNC Symbol;Acc:HGNC:3232]
ENSG00000116661	231.517	207.922	264.423	117.355	101.254	93.784	234.621	104.131	1.16575	1.18904e-12	1.74925e-11	FBXO2	protein_coding	F-box protein 2 [Source:HGNC Symbol;Acc:HGNC:13581]
ENSG00000136478	2664.01	2809.66	2768.54	2178.19	2276.62	2224.02	2747.41	2226.27	0.304501	1.19851e-12	1.76162e-11	TEX2	protein_coding	testis expressed 2 [Source:HGNC Symbol;Acc:HGNC:30884]
ENSG00000101310	2221.93	2239.23	2286.05	1725.66	1824.7	1819	2249.07	1789.79	0.330414	1.22158e-12	1.79393e-11	SEC23B	protein_coding	Sec23 homolog B, coat complex II component [Source:HGNC Symbol;Acc:HGNC:10702]
ENSG00000013523	956.447	943.787	829.089	1207.34	1292.85	1322.25	909.774	1274.15	-0.484102	1.24364e-12	1.8247e-11	ANGEL1	protein_coding	angel homolog 1 [Source:HGNC Symbol;Acc:HGNC:19961]
ENSG00000114554	7987.85	7311.63	7069.9	8972.35	8801.63	8854.86	7456.46	8876.28	-0.251751	1.3513e-12	1.98091e-11	PLXNA1	protein_coding	plexin A1 [Source:HGNC Symbol;Acc:HGNC:9099]
ENSG00000105976	18455.3	19286.2	18743.5	20954.2	20858.3	20933.4	18828.3	20915.3	-0.151406	1.39942e-12	2.04963e-11	MET	protein_coding	MET proto-oncogene, receptor tyrosine kinase [Source:HGNC Symbol;Acc:HGNC:7029]
ENSG00000134287	6694.08	6696	6974.04	5665.07	5932.42	5908.39	6788.04	5835.29	0.218531	1.4418e-12	2.10982e-11	ARF3	protein_coding	ADP ribosylation factor 3 [Source:HGNC Symbol;Acc:HGNC:654]
ENSG00000006740	1321.01	1372.29	1324.22	1690.98	1718.12	1807.66	1339.17	1738.92	-0.375719	1.4545e-12	2.12653e-11	ARHGAP44	protein_coding	Rho GTPase activating protein 44 [Source:HGNC Symbol;Acc:HGNC:29096]
ENSG00000004142	8177.47	8058.35	8330.92	7348.94	6826.65	6711.23	8188.91	6962.27	0.23318	1.51631e-12	2.21494e-11	POLDIP2	protein_coding	DNA polymerase delta interacting protein 2 [Source:HGNC Symbol;Acc:HGNC:23781]
ENSG00000008513	1075.87	1057.69	1089.3	1466.05	1458.06	1362.44	1074.29	1428.85	-0.412326	1.52896e-12	2.23144e-11	ST3GAL1	protein_coding	ST3 beta-galactoside alpha-2,3-sialyltransferase 1 [Source:HGNC Symbol;Acc:HGNC:10862]
ENSG00000181523	1471.86	1378.62	1349.51	1774.56	1826.83	1837.55	1399.99	1812.98	-0.372816	1.55636e-12	2.26943e-11	SGSH	protein_coding	N-sulfoglucosamine sulfohydrolase [Source:HGNC Symbol;Acc:HGNC:10818]
ENSG00000085563	21806.6	22422.2	22012.5	24215.2	24305.2	24292.1	22080.4	24270.9	-0.136248	1.64234e-12	2.39193e-11	ABCB1	protein_coding	ATP binding cassette subfamily B member 1 [Source:HGNC Symbol;Acc:HGNC:40]
ENSG00000141385	3170	3226.41	3314.25	2602.27	2711.47	2690.88	3236.89	2668.21	0.279296	1.64326e-12	2.39193e-11	AFG3L2	protein_coding	AFG3 like matrix AAA peptidase subunit 2 [Source:HGNC Symbol;Acc:HGNC:315]
ENSG00000214253	1806.04	1697.73	1916.28	1439.38	1317.37	1278.97	1806.68	1345.24	0.423071	1.6755e-12	2.4367e-11	FIS1	protein_coding	fission, mitochondrial 1 [Source:HGNC Symbol;Acc:HGNC:21689]
ENSG00000116489	1233.01	1308.1	1261.02	1628.75	1645.64	1663.38	1267.38	1645.92	-0.375991	1.75945e-12	2.55654e-11	CAPZA1	protein_coding	capping actin protein of muscle Z-line subunit alpha 1 [Source:HGNC Symbol;Acc:HGNC:1488]
ENSG00000081087	469.319	528.846	505.67	293.389	272.853	331.851	501.278	299.364	0.744726	1.80468e-12	2.61996e-11	OSTM1	protein_coding	osteopetrosis associated transmembrane protein 1 [Source:HGNC Symbol;Acc:HGNC:21652]
ENSG00000078902	1019.3	985.371	1017.66	1436.71	1367.46	1281.03	1007.45	1361.73	-0.436325	1.93243e-12	2.80296e-11	TOLLIP	protein_coding	toll interacting protein [Source:HGNC Symbol;Acc:HGNC:16476]
ENSG00000170881	1560.91	1644.39	1672.93	1186.89	1251.29	1278.97	1626.08	1239.05	0.393428	2.04558e-12	2.96448e-11	RNF139	protein_coding	ring finger protein 139 [Source:HGNC Symbol;Acc:HGNC:17023]
ENSG00000159131	2239.74	2208.5	2229.16	2672.5	2709.34	2879.48	2225.8	2753.77	-0.306773	2.08068e-12	3.0127e-11	GART	protein_coding	phosphoribosylglycinamide formyltransferase, phosphoribosylglycinamide synthetase, phosphoribosylaminoimidazole synthetase [Source:HGNC Symbol;Acc:HGNC:4163]
ENSG00000081014	280.753	282.051	307.616	459.642	487.085	484.379	290.14	477.035	-0.717358	2.12571e-12	3.07521e-11	AP4E1	protein_coding	adaptor related protein complex 4 subunit epsilon 1 [Source:HGNC Symbol;Acc:HGNC:573]
ENSG00000123983	2692.3	2717.45	2655.82	2081.28	2203.07	2239.48	2688.53	2174.61	0.307313	2.1313e-12	3.0806e-11	ACSL3	protein_coding	acyl-CoA synthetase long chain family member 3 [Source:HGNC Symbol;Acc:HGNC:3570]
ENSG00000083312	3215.05	3013.97	3153.06	3728.7	3740	3792.58	3127.36	3753.76	-0.264068	2.19314e-12	3.1672e-11	TNPO1	protein_coding	transportin 1 [Source:HGNC Symbol;Acc:HGNC:6401]
ENSG00000145901	4199.78	4010.19	4034.83	3440.65	3390.41	3461.76	4081.6	3430.94	0.250081	2.20019e-12	3.17461e-11	TNIP1	protein_coding	TNFAIP3 interacting protein 1 [Source:HGNC Symbol;Acc:HGNC:16903]
ENSG00000242574	152.948	136.506	135.899	257.826	277.116	323.606	141.784	286.183	-1.01262	2.21589e-12	3.19448e-11	HLA-DMB	protein_coding	major histocompatibility complex, class II, DM beta [Source:HGNC Symbol;Acc:HGNC:4935]
ENSG00000273604	1461.38	1343.36	1289.46	969.96	1015.74	1024.41	1364.73	1003.37	0.44435	2.22576e-12	3.20592e-11	EPOP	protein_coding	elongin BC and polycomb repressive complex 2 associated protein [Source:HGNC Symbol;Acc:HGNC:34493]
ENSG00000078369	6898.36	6700.52	6827.6	6006.46	5721.38	5935.19	6808.83	5887.68	0.208962	2.42504e-12	3.48991e-11	GNB1	protein_coding	G protein subunit beta 1 [Source:HGNC Symbol;Acc:HGNC:4396]
ENSG00000144228	1010.92	1053.17	1087.19	705.911	736.489	797.679	1050.43	746.693	0.493691	2.4441e-12	3.51427e-11	SPOPL	protein_coding	speckle type BTB/POZ protein like [Source:HGNC Symbol;Acc:HGNC:27934]
ENSG00000142864	11657.6	11937.5	11862.2	10539.8	10660.4	10467.7	11819.1	10556	0.16327	2.50761e-12	3.60245e-11	SERBP1	protein_coding	SERPINE1 mRNA binding protein 1 [Source:HGNC Symbol;Acc:HGNC:17860]
ENSG00000123562	4223.87	4407.95	4464.65	5163.64	5096.8	5099.38	4365.49	5119.94	-0.229976	2.57609e-12	3.69762e-11	MORF4L2	protein_coding	mortality factor 4 like 2 [Source:HGNC Symbol;Acc:HGNC:16849]
ENSG00000118513	312.181	338.1	358.183	193.814	172.665	179.323	336.155	181.934	0.883448	2.62313e-12	3.76187e-11	MYB	protein_coding	MYB proto-oncogene, transcription factor [Source:HGNC Symbol;Acc:HGNC:7545]
ENSG00000112306	9687.04	9789.53	9794.2	11186.1	10989.8	10775.9	9756.92	10983.9	-0.171114	2.6481e-12	3.79439e-11	RPS12	protein_coding	ribosomal protein S12 [Source:HGNC Symbol;Acc:HGNC:10385]
ENSG00000176720	1048.63	962.771	949.185	1352.25	1275.8	1388.21	986.864	1338.75	-0.440915	2.77954e-12	3.97927e-11	BOK	protein_coding	BOK, BCL2 family apoptosis regulator [Source:HGNC Symbol;Acc:HGNC:1087]
ENSG00000115414	429.511	427.597	429.82	623.228	732.226	638.968	428.976	664.807	-0.630468	2.89196e-12	4.13663e-11	FN1	protein_coding	fibronectin 1 [Source:HGNC Symbol;Acc:HGNC:3778]
ENSG00000149418	8459.27	8204.8	7966.41	7220.02	7113.36	7114.19	8210.16	7149.19	0.199458	2.90821e-12	4.15628e-11	ST14	protein_coding	suppression of tumorigenicity 14 [Source:HGNC Symbol;Acc:HGNC:11344]
ENSG00000141012	1045.49	1008.88	1037.68	656.123	749.279	768.823	1030.68	724.742	0.510103	2.95334e-12	4.21713e-11	GALNS	protein_coding	galactosamine (N-acetyl)-6-sulfatase [Source:HGNC Symbol;Acc:HGNC:4122]
ENSG00000166797	517.508	575.855	540.435	787.704	794.044	803.863	544.599	795.204	-0.544343	2.98697e-12	4.26146e-11	CIAO2A	protein_coding	cytosolic iron-sulfur assembly component 2A [Source:HGNC Symbol;Acc:HGNC:26235]
ENSG00000189334	4886.99	4732.49	4982.96	4108.33	4215.36	4066.72	4867.48	4130.14	0.23668	3.04292e-12	4.33753e-11	S100A14	protein_coding	S100 calcium binding protein A14 [Source:HGNC Symbol;Acc:HGNC:18901]
ENSG00000129422	1455.1	1486.19	1469.6	1081.98	1178.81	1070.79	1470.3	1110.53	0.406073	3.20803e-12	4.56896e-11	MTUS1	protein_coding	microtubule associated scaffold protein 1 [Source:HGNC Symbol;Acc:HGNC:29789]
ENSG00000119396	950.162	985.371	1001.86	1283.8	1329.09	1303.7	979.131	1305.53	-0.414456	3.39162e-12	4.82627e-11	RAB14	protein_coding	RAB14, member RAS oncogene family [Source:HGNC Symbol;Acc:HGNC:16524]
ENSG00000102007	540.555	506.246	583.628	320.949	345.329	348.341	543.476	338.206	0.684418	3.48856e-12	4.95994e-11	PLP2	protein_coding	proteolipid protein 2 [Source:HGNC Symbol;Acc:HGNC:9087]
ENSG00000118680	7692.43	8036.65	8030.68	7035.99	6815.99	6826.65	7919.92	6892.88	0.200204	3.54199e-12	5.03158e-11	MYL12B	protein_coding	myosin light chain 12B [Source:HGNC Symbol;Acc:HGNC:29827]
ENSG00000224051	1065.4	998.931	1068.23	765.477	763.135	727.599	1044.19	752.071	0.47211	3.6174e-12	5.13429e-11	CPTP	protein_coding	ceramide-1-phosphate transfer protein [Source:HGNC Symbol;Acc:HGNC:28116]
ENSG00000136485	2960.48	3079.06	2957.12	3622.9	3499.12	3767.85	2998.89	3629.96	-0.275093	3.88767e-12	5.51315e-11	DCAF7	protein_coding	DDB1 and CUL4 associated factor 7 [Source:HGNC Symbol;Acc:HGNC:30915]
ENSG00000100867	58547.6	58418	59434.2	63909.8	63152.6	63522.7	58799.9	63528.4	-0.111674	4.03668e-12	5.71956e-11	DHRS2	protein_coding	dehydrogenase/reductase 2 [Source:HGNC Symbol;Acc:HGNC:18349]
ENSG00000184584	2515.26	2369.41	2450.39	1988.82	1961.13	1966.37	2445.02	1972.11	0.309234	4.05363e-12	5.73865e-11	TMEM173	protein_coding	transmembrane protein 173 [Source:HGNC Symbol;Acc:HGNC:27962]
ENSG00000189091	8028.71	8343.11	8432.05	9366.21	9366.52	9441.27	8267.96	9391.33	-0.183632	4.0715e-12	5.75442e-11	SF3B3	protein_coding	splicing factor 3b subunit 3 [Source:HGNC Symbol;Acc:HGNC:10770]
ENSG00000140988	42851.6	41146	42374.1	38564.6	38513.8	37345.6	42123.9	38141.3	0.143107	4.07173e-12	5.75442e-11	RPS2	protein_coding	ribosomal protein S2 [Source:HGNC Symbol;Acc:HGNC:10404]
ENSG00000162734	1732.71	1773.67	1862.55	2181.74	2313.92	2270.4	1789.64	2255.35	-0.333177	4.13377e-12	5.83709e-11	PEA15	protein_coding	proliferation and apoptosis adaptor protein 15 [Source:HGNC Symbol;Acc:HGNC:8822]
ENSG00000155850	2748.87	2820.51	2842.29	3271.73	3447.96	3448.37	2803.89	3389.35	-0.27273	4.28988e-12	6.05236e-11	SLC26A2	protein_coding	solute carrier family 26 member 2 [Source:HGNC Symbol;Acc:HGNC:10994]
ENSG00000102554	2035.46	1970.74	1892.05	2380	2468.46	2522.89	1966.08	2457.12	-0.320944	4.32646e-12	6.09875e-11	KLF5	protein_coding	Kruppel like factor 5 [Source:HGNC Symbol;Acc:HGNC:6349]
ENSG00000132361	9942.65	8785.17	9055.71	7861.03	7726.21	7769.65	9261.18	7785.63	0.249867	4.42572e-12	6.23336e-11	CLUH	protein_coding	clustered mitochondria homolog [Source:HGNC Symbol;Acc:HGNC:29094]
ENSG00000008256	4048.92	4062.62	4019.03	3478.88	3354.17	3427.75	4043.52	3420.27	0.241113	4.47309e-12	6.29471e-11	CYTH3	protein_coding	cytohesin 3 [Source:HGNC Symbol;Acc:HGNC:9504]
ENSG00000177169	1329.39	1243.92	1176.74	1600.3	1632.85	1746.86	1250.01	1660	-0.408744	4.85963e-12	6.83285e-11	ULK1	protein_coding	unc-51 like autophagy activating kinase 1 [Source:HGNC Symbol;Acc:HGNC:12558]
ENSG00000178531	1401.67	1356.02	1310.53	1008.19	1050.91	1003.8	1356.07	1020.97	0.410025	4.93494e-12	6.93284e-11	CTXN1	protein_coding	cortexin 1 [Source:HGNC Symbol;Acc:HGNC:31108]
ENSG00000137409	2981.43	2938.03	3078.27	3737.59	3611.04	3499.9	2999.24	3616.17	-0.270906	5.03234e-12	7.06366e-11	MTCH1	protein_coding	mitochondrial carrier 1 [Source:HGNC Symbol;Acc:HGNC:17586]
ENSG00000184012	1772.52	1897.52	1734.03	1428.71	1315.24	1401.61	1801.35	1381.85	0.382486	5.1401e-12	7.20879e-11	TMPRSS2	protein_coding	transmembrane serine protease 2 [Source:HGNC Symbol;Acc:HGNC:11876]
ENSG00000113552	2145.46	2267.26	2330.3	2724.96	2863.89	2754.78	2247.67	2781.21	-0.306633	5.23551e-12	7.33638e-11	GNPDA1	protein_coding	glucosamine-6-phosphate deaminase 1 [Source:HGNC Symbol;Acc:HGNC:4417]
ENSG00000205629	1172.25	1118.26	1081.92	809.041	830.282	832.72	1124.14	824.014	0.448532	5.66109e-12	7.92601e-11	LCMT1	protein_coding	leucine carboxyl methyltransferase 1 [Source:HGNC Symbol;Acc:HGNC:17557]
ENSG00000163155	224.184	216.962	207.536	96.9071	114.044	85.5393	216.227	98.8301	1.13138	5.76678e-12	8.06714e-11	LYSMD1	protein_coding	LysM domain containing 1 [Source:HGNC Symbol;Acc:HGNC:32070]
ENSG00000170088	562.554	576.759	570.986	846.381	817.492	789.435	570.1	817.77	-0.520926	6.06513e-12	8.47733e-11	TMEM192	protein_coding	transmembrane protein 192 [Source:HGNC Symbol;Acc:HGNC:26775]
ENSG00000112851	1759.95	1869.49	1878.35	2219.08	2325.64	2421.9	1835.93	2322.21	-0.337821	6.15076e-12	8.58975e-11	ERBIN	protein_coding	erbb2 interacting protein [Source:HGNC Symbol;Acc:HGNC:15842]
ENSG00000163898	921.877	997.123	1010.29	707.689	701.317	683.284	976.429	697.43	0.485533	6.35074e-12	8.86154e-11	LIPH	protein_coding	lipase H [Source:HGNC Symbol;Acc:HGNC:18483]
ENSG00000013561	1927.56	2065.66	2049.02	1582.52	1559.31	1625.25	2014.08	1589.03	0.342474	6.46879e-12	9.01865e-11	RNF14	protein_coding	ring finger protein 14 [Source:HGNC Symbol;Acc:HGNC:10058]
ENSG00000171865	367.703	404.093	390.841	608.114	622.445	566.827	387.546	599.129	-0.627434	6.53306e-12	9.10057e-11	RNASEH1	protein_coding	ribonuclease H1 [Source:HGNC Symbol;Acc:HGNC:18466]
ENSG00000119899	790.928	873.274	971.308	604.558	597.931	573.01	878.504	591.833	0.569256	6.54062e-12	9.10342e-11	SLC17A5	protein_coding	solute carrier family 17 member 5 [Source:HGNC Symbol;Acc:HGNC:10933]
ENSG00000174749	658.932	604.783	646.837	420.524	423.135	419.452	636.851	421.037	0.595962	6.75873e-12	9.39907e-11	FAM241A	protein_coding	family with sequence similarity 241 member A [Source:HGNC Symbol;Acc:HGNC:26813]
ENSG00000174917	979.494	932.939	974.469	723.692	677.869	611.142	962.3	670.901	0.517981	6.87471e-12	9.55232e-11	C19orf70	protein_coding	chromosome 19 open reading frame 70 [Source:HGNC Symbol;Acc:HGNC:33702]
ENSG00000104442	597.125	642.751	667.906	433.859	370.909	422.543	635.927	409.104	0.634436	6.89574e-12	9.57349e-11	ARMC1	protein_coding	armadillo repeat containing 1 [Source:HGNC Symbol;Acc:HGNC:17684]
ENSG00000172575	158.186	169.954	174.878	312.059	297.367	318.453	167.672	309.293	-0.883334	7.1553e-12	9.92022e-11	RASGRP1	protein_coding	RAS guanyl releasing protein 1 [Source:HGNC Symbol;Acc:HGNC:9878]
ENSG00000186081	2314.12	2329.63	2263.93	1891.02	1831.1	1858.16	2302.56	1860.09	0.307628	7.15749e-12	9.92022e-11	KRT5	protein_coding	keratin 5 [Source:HGNC Symbol;Acc:HGNC:6442]
ENSG00000168036	2410.5	2309.75	2374.54	2901.88	2830.85	2877.42	2364.93	2870.05	-0.280137	7.2198e-12	9.99818e-11	CTNNB1	protein_coding	catenin beta 1 [Source:HGNC Symbol;Acc:HGNC:2514]
ENSG00000120837	559.412	619.247	637.355	857.939	848.402	914.137	605.338	873.492	-0.528304	7.78787e-12	1.07758e-10	NFYB	protein_coding	nuclear transcription factor Y subunit beta [Source:HGNC Symbol;Acc:HGNC:7805]
ENSG00000142634	2426.21	2289.86	2332.4	1904.36	1929.15	1797.36	2349.49	1876.96	0.323293	7.82276e-12	1.0815e-10	EFHD2	protein_coding	EF-hand domain family member D2 [Source:HGNC Symbol;Acc:HGNC:28670]
ENSG00000172340	799.309	798.241	781.682	1074.87	1047.71	1132.62	793.077	1085.07	-0.452035	7.88034e-12	1.08855e-10	SUCLG2	protein_coding	succinate-CoA ligase GDP-forming beta subunit [Source:HGNC Symbol;Acc:HGNC:11450]
ENSG00000281490	723.883	720.496	725.848	470.311	497.743	513.236	723.409	493.763	0.552296	8.08432e-12	1.1158e-10	CICP14	processed_pseudogene	capicua transcriptional repressor pseudogene 14 [Source:HGNC Symbol;Acc:HGNC:38542]
ENSG00000100605	3392.09	3404.5	3370.08	2850.31	2862.82	2820.73	3388.89	2844.62	0.252667	8.53225e-12	1.17664e-10	ITPK1	protein_coding	inositol-tetrakisphosphate 1-kinase [Source:HGNC Symbol;Acc:HGNC:6177]
ENSG00000119421	900.925	930.227	934.437	703.243	613.919	604.958	921.863	640.707	0.522431	8.5665e-12	1.18038e-10	NDUFA8	protein_coding	NADH:ubiquinone oxidoreductase subunit A8 [Source:HGNC Symbol;Acc:HGNC:7692]
ENSG00000108829	2327.74	2279.01	2427.22	1886.58	1879.06	1902.48	2344.66	1889.37	0.310867	8.93924e-12	1.23071e-10	LRRC59	protein_coding	leucine rich repeat containing 59 [Source:HGNC Symbol;Acc:HGNC:28817]
ENSG00000092140	465.129	472.797	454.05	689.018	676.803	686.375	463.992	684.066	-0.559677	9.06257e-12	1.24665e-10	G2E3	protein_coding	G2/M-phase specific E3 ubiquitin protein ligase [Source:HGNC Symbol;Acc:HGNC:20338]
ENSG00000142892	629.6	656.311	663.692	945.067	871.85	928.565	649.868	915.16	-0.494566	9.34613e-12	1.28459e-10	PIGK	protein_coding	phosphatidylinositol glycan anchor biosynthesis class K [Source:HGNC Symbol;Acc:HGNC:8965]
ENSG00000152332	2501.64	2561.06	2576.81	2017.27	2115.67	2093.14	2546.5	2075.36	0.296044	9.75833e-12	1.34013e-10	UHMK1	protein_coding	U2AF homology motif kinase 1 [Source:HGNC Symbol;Acc:HGNC:19683]
ENSG00000173852	283.896	273.011	302.349	487.203	442.32	470.981	286.419	466.835	-0.707384	1.00361e-11	1.37713e-10	DPY19L1	protein_coding	dpy-19 like C-mannosyltransferase 1 [Source:HGNC Symbol;Acc:HGNC:22205]
ENSG00000106771	1331.48	1356.92	1365.31	1685.65	1767.15	1724.18	1351.24	1725.66	-0.35214	1.02947e-11	1.41144e-10	TMEM245	protein_coding	transmembrane protein 245 [Source:HGNC Symbol;Acc:HGNC:1363]
ENSG00000114302	1522.14	1488	1484.35	1107.76	1140.44	1197.55	1498.17	1148.58	0.384063	1.05142e-11	1.44034e-10	PRKAR2A	protein_coding	protein kinase cAMP-dependent type II regulatory subunit alpha [Source:HGNC Symbol;Acc:HGNC:9391]
ENSG00000164109	1082.16	1186.97	1111.42	1490.95	1427.15	1611.85	1126.85	1509.98	-0.421082	1.05428e-11	1.44306e-10	MAD2L1	protein_coding	mitotic arrest deficient 2 like 1 [Source:HGNC Symbol;Acc:HGNC:6763]
ENSG00000179295	5076.61	5170.94	5117.8	4364.38	4467.96	4430.52	5121.78	4420.95	0.212813	1.07785e-11	1.4741e-10	PTPN11	protein_coding	protein tyrosine phosphatase, non-receptor type 11 [Source:HGNC Symbol;Acc:HGNC:9644]
ENSG00000140992	2136.03	2212.11	1959.47	1665.2	1664.83	1577.84	2102.54	1635.96	0.362639	1.1275e-11	1.54073e-10	PDPK1	protein_coding	3-phosphoinositide dependent protein kinase 1 [Source:HGNC Symbol;Acc:HGNC:8816]
ENSG00000132694	1215.2	1185.16	1226.25	1546.07	1533.73	1604.63	1208.87	1561.48	-0.369655	1.14911e-11	1.56896e-10	ARHGEF11	protein_coding	Rho guanine nucleotide exchange factor 11 [Source:HGNC Symbol;Acc:HGNC:14580]
ENSG00000082641	4011.21	4125.9	4061.16	3488.66	3467.15	3403.02	4066.09	3452.94	0.235904	1.16676e-11	1.59174e-10	NFE2L1	protein_coding	nuclear factor, erythroid 2 like 1 [Source:HGNC Symbol;Acc:HGNC:7781]
ENSG00000135968	1151.3	1092.04	1157.77	1460.72	1508.15	1463.44	1133.71	1477.44	-0.382675	1.18786e-11	1.6192e-10	GCC2	protein_coding	GRIP and coiled-coil domain containing 2 [Source:HGNC Symbol;Acc:HGNC:23218]
ENSG00000198753	432.654	405.901	372.932	615.227	649.091	596.714	403.829	620.344	-0.618719	1.19152e-11	1.62285e-10	PLXNB3	protein_coding	plexin B3 [Source:HGNC Symbol;Acc:HGNC:9105]
ENSG00000177383	1787.18	1808.02	1866.77	2398.67	2226.52	2222.99	1820.66	2282.73	-0.327534	1.20021e-11	1.63334e-10	MAGEF1	protein_coding	MAGE family member F1 [Source:HGNC Symbol;Acc:HGNC:29639]
ENSG00000104164	315.324	357.084	347.648	523.654	521.191	573.01	340.019	539.285	-0.663639	1.20491e-11	1.63839e-10	BLOC1S6	protein_coding	biogenesis of lysosomal organelles complex 1 subunit 6 [Source:HGNC Symbol;Acc:HGNC:8549]
ENSG00000147324	558.364	467.373	507.777	317.393	312.289	317.423	511.172	315.701	0.693345	1.21992e-11	1.65742e-10	MFHAS1	protein_coding	malignant fibrous histiocytoma amplified sequence 1 [Source:HGNC Symbol;Acc:HGNC:16982]
ENSG00000138801	1399.58	1417.49	1325.28	1095.32	996.552	1013.07	1380.78	1034.98	0.414835	1.25855e-11	1.70851e-10	PAPSS1	protein_coding	3'-phosphoadenosine 5'-phosphosulfate synthase 1 [Source:HGNC Symbol;Acc:HGNC:8603]
ENSG00000172053	3589.03	3663.05	3728.26	2976.56	3129.28	3096.93	3660.12	3067.59	0.255527	1.2599e-11	1.70893e-10	QARS	protein_coding	glutaminyl-tRNA synthetase [Source:HGNC Symbol;Acc:HGNC:9751]
ENSG00000065154	1853.18	1926.45	1884.68	2280.43	2352.29	2372.43	1888.1	2335.05	-0.30549	1.31638e-11	1.78407e-10	OAT	protein_coding	ornithine aminotransferase [Source:HGNC Symbol;Acc:HGNC:8091]
ENSG00000104375	987.875	984.467	1061.91	665.903	758.872	734.813	1011.42	719.863	0.492156	1.35029e-11	1.82853e-10	STK3	protein_coding	serine/threonine kinase 3 [Source:HGNC Symbol;Acc:HGNC:11406]
ENSG00000159335	4128.54	3724.52	3836.77	3275.28	3109.03	3213.39	3896.61	3199.23	0.283353	1.36208e-11	1.843e-10	PTMS	protein_coding	parathymosin [Source:HGNC Symbol;Acc:HGNC:9629]
ENSG00000013306	4506.72	4107.82	4252.9	3615.79	3615.3	3461.76	4289.15	3564.28	0.266267	1.38755e-11	1.87592e-10	SLC25A39	protein_coding	solute carrier family 25 member 39 [Source:HGNC Symbol;Acc:HGNC:24279]
ENSG00000101337	2669.25	2719.26	2770.65	2190.63	2276.62	2237.42	2719.72	2234.89	0.283813	1.38985e-11	1.87749e-10	TM9SF4	protein_coding	transmembrane 9 superfamily member 4 [Source:HGNC Symbol;Acc:HGNC:30797]
ENSG00000129250	7852.71	7487.01	7456.53	6611.02	6592.17	6694.74	7598.75	6632.64	0.195995	1.39269e-11	1.87979e-10	KIF1C	protein_coding	kinesin family member 1C [Source:HGNC Symbol;Acc:HGNC:6317]
ENSG00000100321	1295.87	1243.01	1194.65	943.289	921.944	928.565	1244.51	931.266	0.417924	1.42121e-11	1.91672e-10	SYNGR1	protein_coding	synaptogyrin 1 [Source:HGNC Symbol;Acc:HGNC:11498]
ENSG00000166145	11346.4	10899.7	10948.8	9816.07	9800.32	9922.56	11065	9846.31	0.168166	1.43835e-11	1.93826e-10	SPINT1	protein_coding	serine peptidase inhibitor, Kunitz type 1 [Source:HGNC Symbol;Acc:HGNC:11246]
ENSG00000119705	1319.96	1210.47	1346.35	948.623	931.536	993.492	1292.26	957.884	0.430793	1.48387e-11	1.99796e-10	SLIRP	protein_coding	SRA stem-loop interacting RNA binding protein [Source:HGNC Symbol;Acc:HGNC:20495]
ENSG00000103855	1337.77	1311.72	1387.43	989.519	1030.66	1040.9	1345.64	1020.36	0.399488	1.56113e-11	2.09954e-10	CD276	protein_coding	CD276 molecule [Source:HGNC Symbol;Acc:HGNC:19137]
ENSG00000070423	1076.92	968.195	980.79	728.137	719.436	728.63	1008.63	725.401	0.474606	1.56185e-11	2.09954e-10	RNF126	protein_coding	ring finger protein 126 [Source:HGNC Symbol;Acc:HGNC:21151]
ENSG00000198015	1744.23	1827.91	1741.4	1420.71	1341.88	1398.52	1771.18	1387.04	0.352606	1.57171e-11	2.11107e-10	MRPL42	protein_coding	mitochondrial ribosomal protein L42 [Source:HGNC Symbol;Acc:HGNC:14493]
ENSG00000184557	1042.35	1041.42	1045.05	1362.92	1356.8	1364.51	1042.94	1361.41	-0.384531	1.59653e-11	2.14267e-10	SOCS3	protein_coding	suppressor of cytokine signaling 3 [Source:HGNC Symbol;Acc:HGNC:19391]
ENSG00000132613	2957.34	2753.62	2658.98	2122.18	2229.72	2319.87	2789.98	2223.92	0.327807	1.62768e-11	2.1827e-10	MTSS1L	protein_coding	MTSS1L, I-BAR domain containing [Source:HGNC Symbol;Acc:HGNC:25094]
ENSG00000111786	1097.87	1148.09	1137.76	1485.61	1409.03	1543.83	1127.91	1479.49	-0.391332	1.6555e-11	2.2182e-10	SRSF9	protein_coding	serine and arginine rich splicing factor 9 [Source:HGNC Symbol;Acc:HGNC:10791]
ENSG00000066557	251.421	244.083	258.103	426.747	401.818	418.421	251.202	415.662	-0.728213	1.68467e-11	2.25547e-10	LRRC40	protein_coding	leucine rich repeat containing 40 [Source:HGNC Symbol;Acc:HGNC:26004]
ENSG00000147403	19743.9	19899.1	20279.5	22205.1	22443.2	21594	19974.1	22080.8	-0.144717	1.69896e-11	2.27275e-10	RPL10	protein_coding	ribosomal protein L10 [Source:HGNC Symbol;Acc:HGNC:10298]
ENSG00000123505	3008.67	3057.36	2962.39	2506.25	2511.1	2498.16	3009.47	2505.17	0.264961	1.70141e-11	2.27419e-10	AMD1	protein_coding	adenosylmethionine decarboxylase 1 [Source:HGNC Symbol;Acc:HGNC:457]
ENSG00000111328	499.699	569.526	541.489	804.596	743.95	805.924	536.905	784.823	-0.546882	1.70488e-11	2.27623e-10	CDK2AP1	protein_coding	cyclin dependent kinase 2 associated protein 1 [Source:HGNC Symbol;Acc:HGNC:14002]
ENSG00000116478	2452.4	2528.52	2530.46	2095.51	2037.87	1969.46	2503.79	2034.28	0.299097	1.70569e-11	2.27623e-10	HDAC1	protein_coding	histone deacetylase 1 [Source:HGNC Symbol;Acc:HGNC:4852]
ENSG00000165832	943.876	1014.3	956.56	706.8	708.778	692.559	971.578	702.712	0.468268	1.72025e-11	2.2938e-10	TRUB1	protein_coding	TruB pseudouridine synthase family member 1 [Source:HGNC Symbol;Acc:HGNC:16060]
ENSG00000001461	231.517	193.458	200.161	378.738	411.411	332.882	208.379	374.343	-0.84684	1.77465e-11	2.36444e-10	NIPAL3	protein_coding	NIPA like domain containing 3 [Source:HGNC Symbol;Acc:HGNC:25233]
ENSG00000139998	788.833	781.969	765.88	1114.88	1001.88	1094.49	778.894	1070.42	-0.459707	1.77662e-11	2.36515e-10	RAB15	protein_coding	RAB15, member RAS oncogene family [Source:HGNC Symbol;Acc:HGNC:20150]
ENSG00000065427	5227.46	5198.96	5385.39	4649.76	4488.21	4369.72	5270.6	4502.57	0.226364	1.77981e-11	2.36749e-10	KARS	protein_coding	lysyl-tRNA synthetase [Source:HGNC Symbol;Acc:HGNC:6215]
ENSG00000119280	2416.78	2476.08	2338.73	2922.33	2929.97	2901.12	2410.53	2917.81	-0.27488	1.79761e-11	2.38924e-10	C1orf198	protein_coding	chromosome 1 open reading frame 198 [Source:HGNC Symbol;Acc:HGNC:25900]
ENSG00000131043	2193.65	2264.55	2287.1	1862.57	1786.33	1788.08	2248.43	1812.33	0.31046	1.85423e-11	2.46251e-10	AAR2	protein_coding	AAR2 splicing factor homolog [Source:HGNC Symbol;Acc:HGNC:15886]
ENSG00000032219	774.167	769.313	796.431	1032.19	1042.38	1153.23	779.97	1075.94	-0.463805	1.89624e-11	2.51629e-10	ARID4A	protein_coding	AT-rich interaction domain 4A [Source:HGNC Symbol;Acc:HGNC:9885]
ENSG00000005893	4060.45	4010.19	4068.54	3319.74	3426.65	3522.57	4046.39	3422.98	0.241854	1.90553e-11	2.52659e-10	LAMP2	protein_coding	lysosomal associated membrane protein 2 [Source:HGNC Symbol;Acc:HGNC:6501]
ENSG00000182580	709.217	611.111	697.404	954.846	927.273	973.911	672.577	952.01	-0.503721	1.91755e-11	2.54049e-10	EPHB3	protein_coding	EPH receptor B3 [Source:HGNC Symbol;Acc:HGNC:3394]
ENSG00000139977	839.117	774.737	808.019	1179.78	1152.16	1028.53	807.291	1120.16	-0.474307	2.01274e-11	2.66446e-10	NAA30	protein_coding	N(alpha)-acetyltransferase 30, NatC catalytic subunit [Source:HGNC Symbol;Acc:HGNC:19844]
ENSG00000078177	191.708	235.043	225.445	371.625	376.238	386.473	217.399	378.112	-0.795836	2.02236e-11	2.67505e-10	N4BP2	protein_coding	NEDD4 binding protein 2 [Source:HGNC Symbol;Acc:HGNC:29851]
ENSG00000178741	1568.24	1568.46	1739.3	1202	1274.73	1242.9	1625.33	1239.88	0.390666	2.05826e-11	2.72036e-10	COX5A	protein_coding	cytochrome c oxidase subunit 5A [Source:HGNC Symbol;Acc:HGNC:2267]
ENSG00000137502	540.555	508.958	573.093	350.288	332.539	353.494	540.869	345.44	0.644911	2.0717e-11	2.73594e-10	RAB30	protein_coding	RAB30, member RAS oncogene family [Source:HGNC Symbol;Acc:HGNC:9770]
ENSG00000070756	13314.8	12691.4	12600.7	14400.9	14302.4	14909.6	12869	14537.6	-0.175984	2.08961e-11	2.75739e-10	PABPC1	protein_coding	poly(A) binding protein cytoplasmic 1 [Source:HGNC Symbol;Acc:HGNC:8554]
ENSG00000099904	925.02	898.586	780.628	584.999	609.655	599.806	868.078	598.153	0.538653	2.09824e-11	2.76657e-10	ZDHHC8	protein_coding	zinc finger DHHC-type containing 8 [Source:HGNC Symbol;Acc:HGNC:18474]
ENSG00000140199	186.471	233.235	209.642	352.955	390.094	369.983	209.783	371.011	-0.818219	2.10491e-11	2.77314e-10	SLC12A6	protein_coding	solute carrier family 12 member 6 [Source:HGNC Symbol;Acc:HGNC:10914]
ENSG00000124641	355.132	345.332	352.916	537.879	555.298	529.725	351.127	540.967	-0.62378	2.1395e-11	2.81647e-10	MED20	protein_coding	mediator complex subunit 20 [Source:HGNC Symbol;Acc:HGNC:16840]
ENSG00000198743	1563	1636.26	1504.37	1150.44	1166.02	1266.6	1567.88	1194.35	0.394124	2.14608e-11	2.82289e-10	SLC5A3	protein_coding	solute carrier family 5 member 3 [Source:HGNC Symbol;Acc:HGNC:11038]
ENSG00000185386	538.46	562.294	503.563	328.062	367.712	318.453	534.773	338.076	0.664009	2.17033e-11	2.8525e-10	MAPK11	protein_coding	mitogen-activated protein kinase 11 [Source:HGNC Symbol;Acc:HGNC:6873]
ENSG00000053254	1337.77	1398.5	1384.27	1712.32	1723.45	1878.77	1373.52	1771.51	-0.366193	2.20057e-11	2.88995e-10	FOXN3	protein_coding	forkhead box N3 [Source:HGNC Symbol;Acc:HGNC:1928]
ENSG00000281406	87.9973	82.2649	117.99	218.708	203.574	213.333	96.084	211.871	-1.14625	2.21068e-11	2.90093e-10	BLACAT1	lincRNA	bladder cancer associated transcript 1 [Source:HGNC Symbol;Acc:HGNC:48597]
ENSG00000180596	139.329	156.394	108.508	280.053	265.392	267.954	134.744	271.133	-1.00463	2.26031e-11	2.9637e-10	HIST1H2BC	protein_coding	histone cluster 1 H2B family member c [Source:HGNC Symbol;Acc:HGNC:4757]
ENSG00000065613	960.638	930.227	1001.86	1225.12	1297.12	1364.51	964.241	1295.58	-0.425959	2.32536e-11	3.04657e-10	SLK	protein_coding	STE20 like kinase [Source:HGNC Symbol;Acc:HGNC:11088]
ENSG00000062716	1923.37	2069.28	2167.01	2565.82	2521.76	2594	2053.22	2560.53	-0.318535	2.3507e-11	3.07733e-10	VMP1	protein_coding	vacuole membrane protein 1 [Source:HGNC Symbol;Acc:HGNC:29559]
ENSG00000154153	1488.62	1484.38	1476.98	1852.79	1899.31	1838.58	1483.33	1863.56	-0.328972	2.38421e-11	3.11873e-10	RETREG1	protein_coding	reticulophagy regulator 1 [Source:HGNC Symbol;Acc:HGNC:25964]
ENSG00000163220	27996.8	28688.8	28610.4	31398.8	30572.3	31409.4	28432	31126.8	-0.130672	2.45156e-11	3.20428e-10	S100A9	protein_coding	S100 calcium binding protein A9 [Source:HGNC Symbol;Acc:HGNC:10499]
ENSG00000100906	4061.5	3891.76	4118.05	3500.21	3299.81	3281.41	4023.77	3360.48	0.25847	2.48077e-11	3.23991e-10	NFKBIA	protein_coding	NFKB inhibitor alpha [Source:HGNC Symbol;Acc:HGNC:7797]
ENSG00000213676	1814.42	1793.56	1809.88	2251.09	2225.46	2196.2	1805.95	2224.25	-0.301	2.49528e-11	3.25628e-10	ATF6B	protein_coding	activating transcription factor 6 beta [Source:HGNC Symbol;Acc:HGNC:2349]
ENSG00000011422	1438.34	1386.75	1393.75	1057.98	1072.23	1107.89	1406.28	1079.36	0.381884	2.5243e-11	3.29155e-10	PLAUR	protein_coding	plasminogen activator, urokinase receptor [Source:HGNC Symbol;Acc:HGNC:9053]
ENSG00000101417	772.072	736.768	761.666	536.99	504.138	534.878	756.835	525.335	0.525264	2.53957e-11	3.30886e-10	PXMP4	protein_coding	peroxisomal membrane protein 4 [Source:HGNC Symbol;Acc:HGNC:15920]
ENSG00000160439	1079.01	1116.45	1130.38	831.267	844.138	781.19	1108.62	818.865	0.43699	2.5463e-11	3.31501e-10	RDH13	protein_coding	retinol dehydrogenase 13 [Source:HGNC Symbol;Acc:HGNC:19978]
ENSG00000100348	1080.06	1050.46	1058.75	791.26	796.176	771.915	1063.09	786.45	0.434479	2.55719e-11	3.32656e-10	TXN2	protein_coding	thioredoxin 2 [Source:HGNC Symbol;Acc:HGNC:17772]
ENSG00000166913	7108.93	7457.18	7457.58	8558.05	8361.45	8236.5	7341.23	8385.33	-0.191906	2.58915e-11	3.36549e-10	YWHAB	protein_coding	tyrosine 3-monooxygenase/tryptophan 5-monooxygenase activation protein beta [Source:HGNC Symbol;Acc:HGNC:12849]
ENSG00000188707	554.174	625.575	575.2	384.072	393.292	365.861	584.983	381.075	0.619758	2.60569e-11	3.38433e-10	ZBED6CL	protein_coding	ZBED6 C-terminal like [Source:HGNC Symbol;Acc:HGNC:21720]
ENSG00000104635	2769.82	2923.57	2907.6	2328.44	2422.63	2329.14	2867	2360.07	0.281523	2.66827e-11	3.46288e-10	SLC39A14	protein_coding	solute carrier family 39 member 14 [Source:HGNC Symbol;Acc:HGNC:20858]
ENSG00000109787	577.221	612.919	526.74	319.171	387.963	371.014	572.293	359.382	0.675752	2.67338e-11	3.46679e-10	KLF3	protein_coding	Kruppel like factor 3 [Source:HGNC Symbol;Acc:HGNC:16516]
ENSG00000075336	1184.82	1287.31	1226.25	952.179	921.944	882.188	1232.79	918.77	0.424178	2.71486e-11	3.51782e-10	TIMM21	protein_coding	translocase of inner mitochondrial membrane 21 [Source:HGNC Symbol;Acc:HGNC:25010]
ENSG00000154358	1108.35	1070.35	1044	798.372	807.9	772.945	1074.23	793.073	0.437662	2.89969e-11	3.75437e-10	OBSCN	protein_coding	obscurin, cytoskeletal calmodulin and titin-interacting RhoGEF [Source:HGNC Symbol;Acc:HGNC:15719]
ENSG00000142192	12822.5	13279.9	13128.5	11910.7	11670.9	11545.7	13076.9	11709.1	0.159343	2.94135e-11	3.80533e-10	APP	protein_coding	amyloid beta precursor protein [Source:HGNC Symbol;Acc:HGNC:620]
ENSG00000099810	1473.96	1448.22	1402.18	1787	1820.44	1857.13	1441.45	1821.52	-0.337072	2.97456e-11	3.84528e-10	MTAP	protein_coding	methylthioadenosine phosphorylase [Source:HGNC Symbol;Acc:HGNC:7413]
ENSG00000112118	3763.98	3732.66	3778.83	3177.49	3190.03	3215.45	3758.49	3194.32	0.234609	2.98293e-11	3.85309e-10	MCM3	protein_coding	minichromosome maintenance complex component 3 [Source:HGNC Symbol;Acc:HGNC:6945]
ENSG00000132912	1924.42	1966.22	2026.9	2573.82	2365.08	2412.62	1972.51	2450.51	-0.314198	3.0046e-11	3.87805e-10	DCTN4	protein_coding	dynactin subunit 4 [Source:HGNC Symbol;Acc:HGNC:15518]
ENSG00000110841	787.786	734.96	753.238	1025.08	1043.45	1027.5	758.661	1032.01	-0.444569	3.04039e-11	3.92117e-10	PPFIBP1	protein_coding	PPFIA binding protein 1 [Source:HGNC Symbol;Acc:HGNC:9249]
ENSG00000059804	3097.72	3051.03	3218.38	3620.24	3757.05	3779.19	3122.38	3718.83	-0.252176	3.2267e-11	4.15821e-10	SLC2A3	protein_coding	solute carrier family 2 member 3 [Source:HGNC Symbol;Acc:HGNC:11007]
ENSG00000091409	340.466	314.596	365.557	548.548	504.138	550.337	340.206	534.341	-0.6543	3.24215e-11	4.17487e-10	ITGA6	protein_coding	integrin subunit alpha 6 [Source:HGNC Symbol;Acc:HGNC:6142]
ENSG00000126003	705.026	658.119	670.013	479.201	455.11	445.216	677.72	459.843	0.557687	3.3968e-11	4.3706e-10	PLAGL2	protein_coding	PLAG1 like zinc finger 2 [Source:HGNC Symbol;Acc:HGNC:9047]
ENSG00000005469	646.361	680.72	675.281	922.84	927.273	916.198	667.454	922.104	-0.465706	3.42949e-11	4.40923e-10	CROT	protein_coding	carnitine O-octanoyltransferase [Source:HGNC Symbol;Acc:HGNC:2366]
ENSG00000176387	376.084	366.124	383.467	219.597	205.705	236.006	375.225	220.436	0.766509	3.54781e-11	4.5558e-10	HSD11B2	protein_coding	hydroxysteroid 11-beta dehydrogenase 2 [Source:HGNC Symbol;Acc:HGNC:5209]
ENSG00000130821	2492.21	2308.84	2285	1901.69	1877.99	1916.9	2362.02	1898.86	0.314394	3.549e-11	4.5558e-10	SLC6A8	protein_coding	solute carrier family 6 member 8 [Source:HGNC Symbol;Acc:HGNC:11055]
ENSG00000101255	3520.94	3495.81	3534.42	2938.33	2980.06	3006.24	3517.06	2974.88	0.241707	3.60122e-11	4.61923e-10	TRIB3	protein_coding	tribbles pseudokinase 3 [Source:HGNC Symbol;Acc:HGNC:16228]
ENSG00000168802	1629	1676.94	1551.78	2016.38	2005.89	2075.62	1619.24	2032.63	-0.327049	3.63924e-11	4.66438e-10	CHTF8	protein_coding	chromosome transmission fidelity factor 8 [Source:HGNC Symbol;Acc:HGNC:24353]
ENSG00000177830	2219.84	2172.34	2212.31	1779.89	1778.87	1805.6	2201.49	1788.12	0.299826	3.69787e-11	4.73586e-10	CHID1	protein_coding	chitinase domain containing 1 [Source:HGNC Symbol;Acc:HGNC:28474]
ENSG00000174684	530.079	527.038	582.574	351.177	343.198	364.83	546.564	353.068	0.629596	3.71053e-11	4.74839e-10	B4GAT1	protein_coding	beta-1,4-glucuronyltransferase 1 [Source:HGNC Symbol;Acc:HGNC:15685]
ENSG00000275023	5881.16	5810.07	5744.62	6597.69	6545.27	6754.51	5811.95	6632.49	-0.190487	3.75526e-11	4.80191e-10	MLLT6	protein_coding	MLLT6, PHD finger containing [Source:HGNC Symbol;Acc:HGNC:7138]
ENSG00000162378	533.222	606.591	516.205	777.035	803.637	838.903	552.006	806.525	-0.543874	3.85676e-11	4.92788e-10	ZYG11B	protein_coding	zyg-11 family member B, cell cycle regulator [Source:HGNC Symbol;Acc:HGNC:25820]
ENSG00000133678	898.83	973.619	1052.43	690.797	658.684	717.293	974.958	688.924	0.50061	3.92072e-11	5.00574e-10	TMEM254	protein_coding	transmembrane protein 254 [Source:HGNC Symbol;Acc:HGNC:25804]
ENSG00000183258	2196.79	2123.52	2268.14	1798.56	1762.88	1740.67	2196.15	1767.37	0.312235	3.992e-11	5.0928e-10	DDX41	protein_coding	DEAD-box helicase 41 [Source:HGNC Symbol;Acc:HGNC:18674]
ENSG00000241878	1754.71	1681.46	1711.9	1378.04	1254.48	1369.66	1716.02	1334.06	0.361762	4.02945e-11	5.13661e-10	PISD	protein_coding	phosphatidylserine decarboxylase [Source:HGNC Symbol;Acc:HGNC:8999]
ENSG00000105701	4692.14	4561.64	4626.88	3936.74	3900.94	4063.63	4626.89	3967.1	0.221766	4.04414e-11	5.15136e-10	FKBP8	protein_coding	FK506 binding protein 8 [Source:HGNC Symbol;Acc:HGNC:3724]
ENSG00000231574	73.3311	80.4569	90.5993	179.589	172.665	198.905	81.4624	183.72	-1.17369	4.05296e-11	5.15863e-10	LINC02015	lincRNA	long intergenic non-protein coding RNA 2015 [Source:HGNC Symbol;Acc:HGNC:52850]
ENSG00000135720	1292.72	1429.24	1426.41	1803.01	1703.2	1935.45	1382.79	1813.89	-0.391009	4.09155e-11	5.20373e-10	DYNC1LI2	protein_coding	dynein cytoplasmic 1 light intermediate chain 2 [Source:HGNC Symbol;Acc:HGNC:2966]
ENSG00000113810	2458.69	2439.02	2565.22	3021.9	2908.65	3160.83	2487.64	3030.46	-0.285298	4.17334e-11	5.30368e-10	SMC4	protein_coding	structural maintenance of chromosomes 4 [Source:HGNC Symbol;Acc:HGNC:14013]
ENSG00000140859	3492.66	3089	2989.78	3953.63	3894.55	4007.98	3190.48	3952.05	-0.30927	4.27497e-11	5.42866e-10	KIFC3	protein_coding	kinesin family member C3 [Source:HGNC Symbol;Acc:HGNC:6326]
ENSG00000103089	460.938	433.021	402.429	256.048	282.445	243.22	432.13	260.571	0.73091	4.43521e-11	5.62782e-10	FA2H	protein_coding	fatty acid 2-hydroxylase [Source:HGNC Symbol;Acc:HGNC:21197]
ENSG00000135127	3688.55	3494	3651.36	4479.95	4213.23	4189.36	3611.31	4294.18	-0.251209	4.48061e-11	5.68106e-10	BICDL1	protein_coding	BICD family like cargo adaptor 1 [Source:HGNC Symbol;Acc:HGNC:28095]
ENSG00000213341	317.419	350.756	304.456	502.317	494.546	546.215	324.21	514.359	-0.663243	4.49272e-11	5.69205e-10	CHUK	protein_coding	conserved helix-loop-helix ubiquitous kinase [Source:HGNC Symbol;Acc:HGNC:1974]
ENSG00000150764	938.638	984.467	959.72	703.243	719.436	679.161	960.942	700.614	0.456443	4.78405e-11	6.0565e-10	DIXDC1	protein_coding	DIX domain containing 1 [Source:HGNC Symbol;Acc:HGNC:23695]
ENSG00000161217	2282.69	2266.35	2205.99	1780.78	1827.9	1872.59	2251.68	1827.09	0.302225	4.90042e-11	6.19906e-10	PCYT1A	protein_coding	phosphate cytidylyltransferase 1, choline, alpha [Source:HGNC Symbol;Acc:HGNC:8754]
ENSG00000273983	50.2842	44.2965	37.9253	123.579	121.505	123.671	44.1687	122.918	-1.47646	5.31605e-11	6.7155e-10	HIST1H3G	protein_coding	histone cluster 1 H3 family member g [Source:HGNC Symbol;Acc:HGNC:4772]
ENSG00000105778	2208.31	2299.8	2248.13	2695.62	2705.08	2775.39	2252.08	2725.36	-0.274489	5.3168e-11	6.7155e-10	AVL9	protein_coding	AVL9 cell migration associated [Source:HGNC Symbol;Acc:HGNC:28994]
ENSG00000160991	976.351	986.275	1022.93	748.585	693.856	737.905	995.185	726.782	0.452143	5.37897e-11	6.78884e-10	ORAI2	protein_coding	ORAI calcium release-activated calcium modulator 2 [Source:HGNC Symbol;Acc:HGNC:21667]
ENSG00000072736	578.268	599.359	666.853	848.16	884.64	881.158	614.827	871.319	-0.503145	5.51215e-11	6.95163e-10	NFATC3	protein_coding	nuclear factor of activated T cells 3 [Source:HGNC Symbol;Acc:HGNC:7777]
ENSG00000164164	2736.3	2748.19	2704.28	3223.72	3193.23	3376.22	2729.59	3264.39	-0.257825	5.59581e-11	7.05175e-10	OTUD4	protein_coding	OTU deubiquitinase 4 [Source:HGNC Symbol;Acc:HGNC:24949]
ENSG00000156467	375.036	398.669	513.045	700.576	686.395	656.488	428.916	681.153	-0.669274	5.61816e-11	7.07452e-10	UQCRB	protein_coding	ubiquinol-cytochrome c reductase binding protein [Source:HGNC Symbol;Acc:HGNC:12582]
ENSG00000164104	2062.7	2048.49	2251.29	2631.61	2554.8	2675.42	2120.82	2620.61	-0.306197	5.77895e-11	7.27144e-10	HMGB2	protein_coding	high mobility group box 2 [Source:HGNC Symbol;Acc:HGNC:5000]
ENSG00000215146	317.419	317.308	303.402	183.146	139.624	183.446	312.71	168.738	0.886782	6.13069e-11	7.70816e-10	BX322639.1	transcribed_unprocessed_pseudogene	zinc finger protein 91 pseudogene [Source:NCBI gene;Acc:441666]
ENSG00000180198	1969.46	1971.65	2002.66	2476.91	2467.4	2337.39	1981.26	2427.23	-0.293357	6.20129e-11	7.79099e-10	RCC1	protein_coding	regulator of chromosome condensation 1 [Source:HGNC Symbol;Acc:HGNC:1913]
ENSG00000173230	2166.41	2172.34	2155.42	2552.48	2702.95	2635.23	2164.72	2630.22	-0.28017	6.47701e-11	8.13121e-10	GOLGB1	protein_coding	golgin B1 [Source:HGNC Symbol;Acc:HGNC:4429]
ENSG00000116396	1347.2	1309.01	1318.96	1006.41	984.828	1050.17	1325.05	1013.8	0.386025	6.57101e-11	8.24295e-10	KCNC4	protein_coding	potassium voltage-gated channel subfamily C member 4 [Source:HGNC Symbol;Acc:HGNC:6236]
ENSG00000132603	1655.19	1742.03	1678.19	1306.02	1322.7	1369.66	1691.8	1332.79	0.345208	6.75658e-11	8.4693e-10	NIP7	protein_coding	NIP7, nucleolar pre-rRNA processing protein [Source:HGNC Symbol;Acc:HGNC:24328]
ENSG00000154447	369.798	363.412	369.771	549.437	539.311	586.408	367.661	558.385	-0.603052	6.77238e-11	8.48267e-10	SH3RF1	protein_coding	SH3 domain containing ring finger 1 [Source:HGNC Symbol;Acc:HGNC:17650]
ENSG00000115415	7006.26	7286.32	7200.53	8181.09	7992.67	8146.84	7164.37	8106.87	-0.178205	6.92013e-11	8.66117e-10	STAT1	protein_coding	signal transducer and activator of transcription 1 [Source:HGNC Symbol;Acc:HGNC:11362]
ENSG00000140526	1261.3	1290.93	1161.99	921.951	949.656	914.137	1238.07	928.581	0.416207	7.02104e-11	8.78082e-10	ABHD2	protein_coding	abhydrolase domain containing 2 [Source:HGNC Symbol;Acc:HGNC:18717]
ENSG00000125304	5298.7	5374.34	5287.41	4530.63	4532.98	4743.82	5320.15	4602.48	0.209484	7.05657e-11	8.81858e-10	TM9SF2	protein_coding	transmembrane 9 superfamily member 2 [Source:HGNC Symbol;Acc:HGNC:11865]
ENSG00000152700	231.517	261.259	260.209	443.639	400.753	401.932	250.995	415.441	-0.727406	7.35805e-11	9.18838e-10	SAR1B	protein_coding	secretion associated Ras related GTPase 1B [Source:HGNC Symbol;Acc:HGNC:10535]
ENSG00000152291	5586.78	5484.63	5444.38	6202.94	6377.93	6271.16	5505.27	6284.01	-0.190642	7.42465e-11	9.26454e-10	TGOLN2	protein_coding	trans-golgi network protein 2 [Source:HGNC Symbol;Acc:HGNC:15450]
ENSG00000102804	3151.14	3077.25	3190.99	3738.48	3667.52	3683.34	3139.79	3696.45	-0.236211	7.4685e-11	9.31223e-10	TSC22D1	protein_coding	TSC22 domain family member 1 [Source:HGNC Symbol;Acc:HGNC:16826]
ENSG00000156411	1447.77	1344.26	1500.16	1107.76	1063.7	1095.52	1430.73	1088.99	0.392002	7.64295e-11	9.52257e-10	ATP5MPL	protein_coding	ATP synthase membrane subunit 6.8PL [Source:HGNC Symbol;Acc:HGNC:1188]
ENSG00000237441	1472.91	1419.3	1492.78	1814.56	1853.48	1829.3	1461.66	1832.45	-0.326653	7.74047e-11	9.63679e-10	RGL2	protein_coding	ral guanine nucleotide dissociation stimulator like 2 [Source:HGNC Symbol;Acc:HGNC:9769]
ENSG00000197958	13279.2	13163.3	13935.4	15219.8	14998.4	14938.5	13459.3	15052.2	-0.161762	7.95294e-11	9.89386e-10	RPL12	protein_coding	ribosomal protein L12 [Source:HGNC Symbol;Acc:HGNC:10302]
ENSG00000167880	2829.53	2778.93	2594.72	3268.17	3343.51	3271.1	2734.39	3294.26	-0.26816	7.96218e-11	9.8979e-10	EVPL	protein_coding	envoplakin [Source:HGNC Symbol;Acc:HGNC:3503]
ENSG00000132432	1667.76	1694.12	1816.2	2100.84	2139.12	2303.38	1726.02	2181.11	-0.337484	8.1041e-11	1.00667e-09	SEC61G	protein_coding	Sec61 translocon gamma subunit [Source:HGNC Symbol;Acc:HGNC:18277]
ENSG00000152952	5894.77	6121.05	6078.58	5254.32	5161.82	5348.78	6031.47	5254.97	0.199001	8.13468e-11	1.00972e-09	PLOD2	protein_coding	procollagen-lysine,2-oxoglutarate 5-dioxygenase 2 [Source:HGNC Symbol;Acc:HGNC:9082]
ENSG00000179218	16211.4	16251.4	16980	18056.7	18522	18329.1	16480.9	18302.6	-0.151256	8.38159e-11	1.03958e-09	CALR	protein_coding	calreticulin [Source:HGNC Symbol;Acc:HGNC:1455]
ENSG00000128654	1037.11	1045.04	1127.22	816.153	773.793	773.976	1069.79	787.974	0.439561	8.54572e-11	1.05914e-09	MTX2	protein_coding	metaxin 2 [Source:HGNC Symbol;Acc:HGNC:7506]
ENSG00000118194	375.036	390.532	322.365	216.041	205.705	206.119	362.644	209.288	0.793637	8.74751e-11	1.08334e-09	TNNT2	protein_coding	troponin T2, cardiac type [Source:HGNC Symbol;Acc:HGNC:11949]
ENSG00000204217	1450.91	1454.55	1454.86	1778.11	1809.78	1893.2	1453.44	1827.03	-0.32949	8.86381e-11	1.09692e-09	BMPR2	protein_coding	bone morphogenetic protein receptor type 2 [Source:HGNC Symbol;Acc:HGNC:1078]
ENSG00000086598	3366.95	3543.72	3551.28	2847.65	3000.31	2919.67	3487.32	2922.54	0.255836	8.91905e-11	1.10293e-09	TMED2	protein_coding	transmembrane p24 trafficking protein 2 [Source:HGNC Symbol;Acc:HGNC:16996]
ENSG00000113356	575.125	624.671	555.184	378.738	397.555	386.473	584.993	387.589	0.596163	9.31889e-11	1.15151e-09	POLR3G	protein_coding	RNA polymerase III subunit G [Source:HGNC Symbol;Acc:HGNC:30075]
ENSG00000000971	98.4732	75.9369	90.5993	189.369	192.915	190.66	88.3364	190.981	-1.11677	9.45722e-11	1.16773e-09	CFH	protein_coding	complement factor H [Source:HGNC Symbol;Acc:HGNC:4883]
ENSG00000140443	425.32	386.916	391.894	595.668	586.207	615.264	401.377	599.046	-0.578693	1.01936e-10	1.25772e-09	IGF1R	protein_coding	insulin like growth factor 1 receptor [Source:HGNC Symbol;Acc:HGNC:5465]
ENSG00000221978	6715.03	6747.53	6700.13	5898	6043.26	5767.2	6720.9	5902.82	0.187444	1.03472e-10	1.27572e-09	CCNL2	protein_coding	cyclin L2 [Source:HGNC Symbol;Acc:HGNC:20570]
ENSG00000167964	769.977	751.233	743.757	555.66	498.809	528.695	754.989	527.721	0.514795	1.04238e-10	1.2842e-09	RAB26	protein_coding	RAB26, member RAS oncogene family [Source:HGNC Symbol;Acc:HGNC:14259]
ENSG00000138448	2813.82	2834.98	2852.82	2346.22	2318.18	2418.8	2833.87	2361.07	0.263387	1.05038e-10	1.2931e-09	ITGAV	protein_coding	integrin subunit alpha V [Source:HGNC Symbol;Acc:HGNC:6150]
ENSG00000090905	2331.93	2517.67	2452.5	2000.38	1979.25	1977.71	2434.03	1985.78	0.294135	1.05341e-10	1.29586e-09	TNRC6A	protein_coding	trinucleotide repeat containing 6A [Source:HGNC Symbol;Acc:HGNC:11969]
ENSG00000163900	1458.24	1471.73	1480.14	1139.77	1174.55	1130.56	1470.04	1148.29	0.35672	1.07834e-10	1.32554e-09	TMEM41A	protein_coding	transmembrane protein 41A [Source:HGNC Symbol;Acc:HGNC:30544]
ENSG00000138744	721.788	744	685.815	486.314	509.467	501.899	717.201	499.227	0.524389	1.08588e-10	1.33382e-09	NAAA	protein_coding	N-acylethanolamine acid amidase [Source:HGNC Symbol;Acc:HGNC:736]
ENSG00000135926	4662.81	4633.05	4677.45	4040.76	4006.46	4056.42	4657.77	4034.55	0.207048	1.12816e-10	1.38472e-09	TMBIM1	protein_coding	transmembrane BAX inhibitor motif containing 1 [Source:HGNC Symbol;Acc:HGNC:23410]
ENSG00000089327	2615.83	2431.79	2413.52	1975.48	2093.29	1956.07	2487.05	2008.28	0.30864	1.12906e-10	1.3848e-09	FXYD5	protein_coding	FXYD domain containing ion transport regulator 5 [Source:HGNC Symbol;Acc:HGNC:4029]
ENSG00000161204	2439.83	2476.08	2343.99	2048.39	1939.81	1902.48	2419.97	1963.56	0.300974	1.13523e-10	1.39133e-09	ABCF3	protein_coding	ATP binding cassette subfamily F member 3 [Source:HGNC Symbol;Acc:HGNC:72]
ENSG00000084112	1389.1	1337.94	1355.83	1069.53	1063.7	1008.95	1360.95	1047.4	0.376993	1.15281e-10	1.41183e-09	SSH1	protein_coding	slingshot protein phosphatase 1 [Source:HGNC Symbol;Acc:HGNC:30579]
ENSG00000107362	161.328	196.17	183.305	332.507	319.749	309.178	180.268	320.478	-0.82825	1.15794e-10	1.41706e-09	ABHD17B	protein_coding	abhydrolase domain containing 17B [Source:HGNC Symbol;Acc:HGNC:24278]
ENSG00000177917	487.128	578.567	529.9	335.174	350.658	339.065	531.865	341.633	0.641029	1.1952e-10	1.46158e-09	ARL6IP6	protein_coding	ADP ribosylation factor like GTPase 6 interacting protein 6 [Source:HGNC Symbol;Acc:HGNC:24048]
ENSG00000110881	1390.15	1307.2	1338.97	1075.76	1011.47	989.37	1345.44	1025.53	0.38984	1.28063e-10	1.56489e-09	ASIC1	protein_coding	acid sensing ion channel subunit 1 [Source:HGNC Symbol;Acc:HGNC:100]
ENSG00000111775	640.076	720.496	719.527	452.53	476.427	490.563	693.366	473.173	0.553188	1.29146e-10	1.57695e-09	COX6A1	protein_coding	cytochrome c oxidase subunit 6A1 [Source:HGNC Symbol;Acc:HGNC:2277]
ENSG00000174915	1205.77	1210.47	1223.09	953.068	905.956	910.014	1213.11	923.013	0.393245	1.30825e-10	1.5954e-09	PTDSS2	protein_coding	phosphatidylserine synthase 2 [Source:HGNC Symbol;Acc:HGNC:15463]
ENSG00000105364	1678.23	1627.22	1782.49	1348.7	1325.89	1316.07	1695.98	1330.22	0.349249	1.3085e-10	1.5954e-09	MRPL4	protein_coding	mitochondrial ribosomal protein L4 [Source:HGNC Symbol;Acc:HGNC:14276]
ENSG00000206527	6403.9	6488.08	6507.34	5522.82	5463.45	5857.89	6466.44	5614.72	0.20397	1.44415e-10	1.75949e-09	HACD2	protein_coding	3-hydroxyacyl-CoA dehydratase 2 [Source:HGNC Symbol;Acc:HGNC:9640]
ENSG00000176986	3430.85	3484.96	3345.85	4008.75	3961.69	4030.65	3420.55	4000.37	-0.225549	1.45441e-10	1.7707e-09	SEC24C	protein_coding	SEC24 homolog C, COPII coat complex component [Source:HGNC Symbol;Acc:HGNC:10705]
ENSG00000107186	500.747	511.67	506.724	705.021	736.489	722.446	506.38	721.319	-0.509493	1.46881e-10	1.78691e-09	MPDZ	protein_coding	multiple PDZ domain crumbs cell polarity complex component [Source:HGNC Symbol;Acc:HGNC:7208]
ENSG00000250899	300.658	314.596	340.274	150.25	190.784	187.568	318.509	176.201	0.858511	1.48623e-10	1.80677e-09	AC125807.2	lincRNA	novel transcript
ENSG00000005156	604.458	618.343	603.644	785.037	930.471	893.525	608.815	869.677	-0.512009	1.52279e-10	1.84985e-09	LIG3	protein_coding	DNA ligase 3 [Source:HGNC Symbol;Acc:HGNC:6600]
ENSG00000102879	389.702	348.044	370.825	225.82	227.022	204.058	369.524	218.967	0.753065	1.53872e-10	1.86783e-09	CORO1A	protein_coding	coronin 1A [Source:HGNC Symbol;Acc:HGNC:2252]
ENSG00000091622	1393.29	1325.28	1358.99	1701.65	1767.15	1677.81	1359.19	1715.54	-0.336218	1.54194e-10	1.87037e-09	PITPNM3	protein_coding	PITPNM family member 3 [Source:HGNC Symbol;Acc:HGNC:21043]
ENSG00000119986	663.123	607.495	627.874	411.633	422.069	451.4	632.831	428.367	0.563104	1.57722e-10	1.91176e-09	AVPI1	protein_coding	arginine vasopressin induced 1 [Source:HGNC Symbol;Acc:HGNC:30898]
ENSG00000133706	3255.9	3359.3	3273.16	2783.63	2788.21	2792.91	3296.12	2788.25	0.241859	1.5851e-10	1.9199e-09	LARS	protein_coding	leucyl-tRNA synthetase [Source:HGNC Symbol;Acc:HGNC:6512]
ENSG00000113456	1573.48	1665.19	1692.94	1289.13	1307.77	1288.24	1643.87	1295.05	0.344508	1.61437e-10	1.95392e-09	RAD1	protein_coding	RAD1 checkpoint DNA exonuclease [Source:HGNC Symbol;Acc:HGNC:9806]
ENSG00000273802	48.189	36.1604	41.0857	125.357	106.583	119.549	41.8117	117.163	-1.49311	1.63506e-10	1.97751e-09	HIST1H2BG	protein_coding	histone cluster 1 H2B family member g [Source:HGNC Symbol;Acc:HGNC:4746]
ENSG00000196776	1667.76	1667.9	1676.09	1995.93	2151.91	2070.46	1670.58	2072.77	-0.310308	1.66265e-10	2.00941e-09	CD47	protein_coding	CD47 molecule [Source:HGNC Symbol;Acc:HGNC:1682]
ENSG00000244300	635.885	611.111	584.681	841.936	872.916	832.72	610.559	849.191	-0.475558	1.67626e-10	2.02438e-09	GATA2-AS1	antisense	GATA2 antisense RNA 1 [Source:HGNC Symbol;Acc:HGNC:51108]
ENSG00000091436	1522.14	1442.8	1419.04	1839.46	1815.11	1835.49	1461.33	1830.02	-0.325015	1.71122e-10	2.06509e-09	MAP3K20	protein_coding	mitogen-activated protein kinase kinase kinase 20 [Source:HGNC Symbol;Acc:HGNC:17797]
ENSG00000102081	1778.8	1922.83	1888.89	2235.09	2321.38	2350.78	1863.51	2302.42	-0.303835	1.75215e-10	2.11294e-09	FMR1	protein_coding	fragile X mental retardation 1 [Source:HGNC Symbol;Acc:HGNC:3775]
ENSG00000138018	2859.91	3010.35	2900.23	2323.1	2496.18	2440.45	2923.5	2419.91	0.274293	1.81768e-10	2.19036e-09	SELENOI	protein_coding	selenoprotein I [Source:HGNC Symbol;Acc:HGNC:29361]
ENSG00000171992	2659.82	2474.28	2460.93	2045.72	2093.29	2070.46	2531.68	2069.82	0.290487	1.81978e-10	2.1913e-09	SYNPO	protein_coding	synaptopodin [Source:HGNC Symbol;Acc:HGNC:30672]
ENSG00000184752	1073.78	1086.62	1151.45	865.052	811.098	770.884	1103.95	815.678	0.434753	1.82139e-10	2.19164e-09	NDUFA12	protein_coding	NADH:ubiquinone oxidoreductase subunit A12 [Source:HGNC Symbol;Acc:HGNC:23987]
ENSG00000161800	1629	1757.4	1660.28	2080.39	2068.78	2108.59	1682.23	2085.92	-0.309225	1.85821e-10	2.23431e-09	RACGAP1	protein_coding	Rac GTPase activating protein 1 [Source:HGNC Symbol;Acc:HGNC:9804]
ENSG00000139629	5308.12	5500	5352.73	4684.44	4736.55	4670.65	5386.95	4697.21	0.198164	1.92504e-10	2.31298e-09	GALNT6	protein_coding	polypeptide N-acetylgalactosaminyltransferase 6 [Source:HGNC Symbol;Acc:HGNC:4128]
ENSG00000103932	673.599	653.599	679.494	911.282	909.154	913.106	668.897	911.181	-0.446627	1.93305e-10	2.31974e-09	RPAP1	protein_coding	RNA polymerase II associated protein 1 [Source:HGNC Symbol;Acc:HGNC:24567]
ENSG00000006576	1183.77	1224.03	1256.8	1562.07	1519.88	1585.05	1221.53	1555.67	-0.34902	1.93347e-10	2.31974e-09	PHTF2	protein_coding	putative homeodomain transcription factor 2 [Source:HGNC Symbol;Acc:HGNC:13411]
ENSG00000125834	1089.49	1021.53	1051.37	1321.14	1373.86	1416.04	1054.13	1370.34	-0.378495	1.93527e-10	2.32021e-09	STK35	protein_coding	serine/threonine kinase 35 [Source:HGNC Symbol;Acc:HGNC:16254]
ENSG00000178764	4782.24	4895.22	4749.09	5436.58	5497.56	5828.01	4808.85	5587.38	-0.215812	1.95739e-10	2.34503e-09	ZHX2	protein_coding	zinc fingers and homeoboxes 2 [Source:HGNC Symbol;Acc:HGNC:18513]
ENSG00000136504	526.936	516.19	549.916	729.915	734.358	819.322	531.014	761.198	-0.519622	2.03534e-10	2.43666e-09	KAT7	protein_coding	lysine acetyltransferase 7 [Source:HGNC Symbol;Acc:HGNC:17016]
ENSG00000112514	1770.42	1720.33	1804.61	1394.04	1394.11	1436.65	1765.12	1408.26	0.325472	2.10407e-10	2.51711e-09	CUTA	protein_coding	cutA divalent cation tolerance homolog [Source:HGNC Symbol;Acc:HGNC:21101]
ENSG00000157933	2424.12	2307.94	2221.79	1899.02	1842.82	1900.41	2317.95	1880.75	0.301165	2.11927e-10	2.53346e-09	SKI	protein_coding	SKI proto-oncogene [Source:HGNC Symbol;Acc:HGNC:10896]
ENSG00000069869	610.743	608.399	641.569	404.521	434.859	428.727	620.237	422.702	0.554133	2.14932e-10	2.56753e-09	NEDD4	protein_coding	neural precursor cell expressed, developmentally down-regulated 4, E3 ubiquitin protein ligase [Source:HGNC Symbol;Acc:HGNC:7727]
ENSG00000188811	428.463	396.861	365.557	545.88	649.091	646.182	396.96	613.718	-0.626373	2.15453e-10	2.57189e-09	NHLRC3	protein_coding	NHL repeat containing 3 [Source:HGNC Symbol;Acc:HGNC:33751]
ENSG00000250479	788.833	772.929	711.099	528.099	531.85	541.062	757.62	533.67	0.506271	2.22848e-10	2.65824e-09	CHCHD10	protein_coding	coiled-coil-helix-coiled-coil-helix domain containing 10 [Source:HGNC Symbol;Acc:HGNC:15559]
ENSG00000160410	610.743	518.902	620.5	801.04	876.113	839.934	583.382	839.029	-0.525908	2.28397e-10	2.72248e-09	SHKBP1	protein_coding	SH3KBP1 binding protein 1 [Source:HGNC Symbol;Acc:HGNC:19214]
ENSG00000102024	5233.75	5358.07	5463.35	4588.42	4694.99	4686.11	5351.72	4656.5	0.201097	2.31579e-10	2.75841e-09	PLS3	protein_coding	plastin 3 [Source:HGNC Symbol;Acc:HGNC:9091]
ENSG00000180530	490.271	575.855	515.152	787.704	727.963	770.884	527.092	762.183	-0.530603	2.33642e-10	2.78098e-09	NRIP1	protein_coding	nuclear receptor interacting protein 1 [Source:HGNC Symbol;Acc:HGNC:8001]
ENSG00000198805	1820.71	1814.35	1861.5	1420.71	1503.89	1480.96	1832.18	1468.52	0.319931	2.37983e-10	2.8306e-09	PNP	protein_coding	purine nucleoside phosphorylase [Source:HGNC Symbol;Acc:HGNC:7892]
ENSG00000116898	1373.39	1346.98	1330.54	1095.32	1017.87	987.309	1350.3	1033.5	0.384162	2.38539e-10	2.83518e-09	MRPS15	protein_coding	mitochondrial ribosomal protein S15 [Source:HGNC Symbol;Acc:HGNC:14504]
ENSG00000119900	490.271	490.878	525.686	757.476	667.21	757.486	502.278	727.391	-0.536069	2.38716e-10	2.83525e-09	OGFRL1	protein_coding	opioid growth factor receptor like 1 [Source:HGNC Symbol;Acc:HGNC:21378]
ENSG00000188211	297.515	330.868	310.777	188.48	163.072	181.384	313.053	177.646	0.816203	2.39612e-10	2.84385e-09	NCR3LG1	protein_coding	natural killer cell cytotoxicity receptor 3 ligand 1 [Source:HGNC Symbol;Acc:HGNC:42400]
ENSG00000003400	543.698	563.198	523.579	785.037	748.213	763.67	543.492	765.64	-0.494038	2.44079e-10	2.89479e-09	CASP10	protein_coding	caspase 10 [Source:HGNC Symbol;Acc:HGNC:1500]
ENSG00000165156	1066.44	1036	1017.66	1416.27	1379.19	1280	1040.03	1358.48	-0.386214	2.47233e-10	2.93009e-09	ZHX1	protein_coding	zinc fingers and homeoboxes 1 [Source:HGNC Symbol;Acc:HGNC:12871]
ENSG00000210082	96014.5	98096.9	99230.4	104511	105463	107932	97780.6	105969	-0.115977	2.50897e-10	2.97138e-09	MT-RNR2	Mt_rRNA	mitochondrially encoded 16S RNA [Source:HGNC Symbol;Acc:HGNC:7471]
ENSG00000196504	2359.17	2538.46	2476.73	2902.77	2956.62	3021.7	2458.12	2960.36	-0.267161	2.57876e-10	3.05185e-09	PRPF40A	protein_coding	pre-mRNA processing factor 40 homolog A [Source:HGNC Symbol;Acc:HGNC:16463]
ENSG00000170860	1003.59	1017.01	1091.41	783.258	745.016	778.098	1037.34	768.791	0.431088	2.60264e-10	3.07789e-09	LSM3	protein_coding	LSM3 homolog, U6 small nuclear RNA and mRNA degradation associated [Source:HGNC Symbol;Acc:HGNC:17874]
ENSG00000114812	379.227	351.66	355.023	511.207	567.022	574.041	361.97	550.757	-0.604682	2.625e-10	3.10212e-09	VIPR1	protein_coding	vasoactive intestinal peptide receptor 1 [Source:HGNC Symbol;Acc:HGNC:12694]
ENSG00000161642	2064.79	1801.69	1771.95	1311.36	1486.83	1464.47	1879.48	1420.89	0.404448	2.74203e-10	3.2381e-09	ZNF385A	protein_coding	zinc finger protein 385A [Source:HGNC Symbol;Acc:HGNC:17521]
ENSG00000173915	1332.53	1337.03	1517.01	1046.42	936.866	1099.64	1395.52	1027.64	0.440072	2.96277e-10	3.49628e-09	ATP5MD	protein_coding	ATP synthase membrane subunit DAPIT [Source:HGNC Symbol;Acc:HGNC:30889]
ENSG00000175745	542.65	513.478	485.654	718.357	741.818	733.783	513.927	731.319	-0.508447	3.04279e-10	3.58814e-09	NR2F1	protein_coding	nuclear receptor subfamily 2 group F member 1 [Source:HGNC Symbol;Acc:HGNC:7975]
ENSG00000026297	883.116	844.346	879.656	668.57	612.853	584.347	869.039	621.923	0.480107	3.04912e-10	3.59305e-09	RNASET2	protein_coding	ribonuclease T2 [Source:HGNC Symbol;Acc:HGNC:21686]
ENSG00000138778	642.171	696.992	678.441	865.052	948.59	1017.2	672.535	943.612	-0.486233	3.10829e-10	3.66016e-09	CENPE	protein_coding	centromere protein E [Source:HGNC Symbol;Acc:HGNC:1856]
ENSG00000157800	628.552	705.128	656.318	400.964	452.978	482.318	663.333	445.42	0.578253	3.22809e-10	3.79852e-09	SLC37A3	protein_coding	solute carrier family 37 member 3 [Source:HGNC Symbol;Acc:HGNC:20651]
ENSG00000171055	1576.62	1567.55	1606.56	1958.59	1932.35	1960.19	1583.58	1950.38	-0.300987	3.28297e-10	3.86035e-09	FEZ2	protein_coding	fasciculation and elongation protein zeta 2 [Source:HGNC Symbol;Acc:HGNC:3660]
ENSG00000104205	111.044	116.617	105.348	205.372	219.561	233.945	111.003	219.626	-0.981425	3.29076e-10	3.86676e-09	SGK3	protein_coding	serum/glucocorticoid regulated kinase family member 3 [Source:HGNC Symbol;Acc:HGNC:10812]
ENSG00000115306	4294.06	4368.18	4369.83	5000.05	5016.87	4930.36	4344.02	4982.43	-0.197736	3.36465e-10	3.95078e-09	SPTBN1	protein_coding	spectrin beta, non-erythrocytic 1 [Source:HGNC Symbol;Acc:HGNC:11275]
ENSG00000146247	1308.44	1624.51	1459.07	1845.68	1951.54	2092.11	1464	1963.11	-0.421	3.41013e-10	4.00134e-09	PHIP	protein_coding	pleckstrin homology domain interacting protein [Source:HGNC Symbol;Acc:HGNC:15673]
ENSG00000120889	2052.22	1917.41	2101.69	1608.3	1617.93	1643.8	2023.77	1623.34	0.31722	3.44951e-10	4.04467e-09	TNFRSF10B	protein_coding	TNF receptor superfamily member 10b [Source:HGNC Symbol;Acc:HGNC:11905]
ENSG00000166347	2860.96	2838.59	2912.87	2436.01	2434.36	2335.33	2870.81	2401.9	0.256778	3.52725e-10	4.13288e-09	CYB5A	protein_coding	cytochrome b5 type A [Source:HGNC Symbol;Acc:HGNC:2570]
ENSG00000184384	401.226	337.196	344.488	556.549	567.022	530.756	360.97	551.442	-0.61308	3.57046e-10	4.18055e-09	MAML2	protein_coding	mastermind like transcriptional coactivator 2 [Source:HGNC Symbol;Acc:HGNC:16259]
ENSG00000170275	3440.28	3272.52	3369.03	2731.18	2814.86	2918.64	3360.61	2821.56	0.252397	3.64096e-10	4.26008e-09	CRTAP	protein_coding	cartilage associated protein [Source:HGNC Symbol;Acc:HGNC:2379]
ENSG00000132781	214.755	197.978	174.878	339.619	335.737	332.882	195.87	336.079	-0.778685	3.67811e-10	4.30049e-09	MUTYH	protein_coding	mutY DNA glycosylase [Source:HGNC Symbol;Acc:HGNC:7527]
ENSG00000100030	1619.57	1609.14	1676.09	1953.26	2043.2	2068.4	1634.93	2021.62	-0.305933	3.93974e-10	4.60314e-09	MAPK1	protein_coding	mitogen-activated protein kinase 1 [Source:HGNC Symbol;Acc:HGNC:6871]
ENSG00000114956	309.038	276.627	325.525	479.201	468.966	472.012	303.73	473.393	-0.643149	4.11842e-10	4.80851e-09	DGUOK	protein_coding	deoxyguanosine kinase [Source:HGNC Symbol;Acc:HGNC:2858]
ENSG00000160208	2351.83	2330.54	2365.06	1979.04	1881.19	1945.76	2349.14	1935.33	0.27867	4.18118e-10	4.87834e-09	RRP1B	protein_coding	ribosomal RNA processing 1B [Source:HGNC Symbol;Acc:HGNC:23818]
ENSG00000198938	30967.7	29943.5	29835.6	26219.2	27945	27521	30249	27228.4	0.151978	4.2458e-10	4.94918e-09	MT-CO3	protein_coding	mitochondrially encoded cytochrome c oxidase III [Source:HGNC Symbol;Acc:HGNC:7422]
ENSG00000126775	998.351	1026.05	1029.25	1255.35	1333.35	1413.97	1017.88	1334.23	-0.389104	4.24789e-10	4.94918e-09	ATG14	protein_coding	autophagy related 14 [Source:HGNC Symbol;Acc:HGNC:19962]
ENSG00000160691	5119.56	5142.91	5423.31	4520.85	4478.62	4577.9	5228.6	4525.79	0.207924	4.34358e-10	5.05539e-09	SHC1	protein_coding	SHC adaptor protein 1 [Source:HGNC Symbol;Acc:HGNC:10840]
ENSG00000100228	180.185	166.338	182.252	80.9041	81.0032	85.5393	176.258	82.4822	1.09483	4.34517e-10	5.05539e-09	RAB36	protein_coding	RAB36, member RAS oncogene family [Source:HGNC Symbol;Acc:HGNC:9775]
ENSG00000141568	2853.63	2796.1	2723.25	2351.55	2329.91	2326.05	2790.99	2335.84	0.256724	4.54883e-10	5.28861e-09	FOXK2	protein_coding	forkhead box K2 [Source:HGNC Symbol;Acc:HGNC:6036]
ENSG00000189339	799.309	819.033	786.949	1013.52	1098.87	1108.92	801.764	1073.77	-0.419584	4.6618e-10	5.41615e-09	SLC35E2B	protein_coding	solute carrier family 35 member E2B [Source:HGNC Symbol;Acc:HGNC:33941]
ENSG00000176566	3048.48	3045.61	2997.15	3560.67	3552.42	3518.45	3030.41	3543.84	-0.22576	4.69257e-10	5.44807e-09	DCAF4L2	protein_coding	DDB1 and CUL4 associated factor 4 like 2 [Source:HGNC Symbol;Acc:HGNC:26657]
ENSG00000130475	738.549	663.544	619.446	400.075	482.822	458.614	673.846	447.17	0.594185	4.76685e-10	5.53042e-09	FCHO1	protein_coding	FCH domain only 1 [Source:HGNC Symbol;Acc:HGNC:29002]
ENSG00000137770	1174.35	1259.29	1278.92	961.07	928.339	947.116	1237.52	945.508	0.38811	4.7972e-10	5.56173e-09	CTDSPL2	protein_coding	CTD small phosphatase like 2 [Source:HGNC Symbol;Acc:HGNC:26936]
ENSG00000257923	2979.34	2904.58	3024.54	3465.54	3436.24	3613.26	2969.49	3505.01	-0.239568	4.81723e-10	5.58103e-09	CUX1	protein_coding	cut like homeobox 1 [Source:HGNC Symbol;Acc:HGNC:2557]
ENSG00000214485	3527.23	3484.06	3553.39	4230.13	4025.64	4055.39	3521.56	4103.72	-0.221621	4.9665e-10	5.74993e-09	RPL7P1	processed_pseudogene	ribosomal protein L7 pseudogene 1 [Source:HGNC Symbol;Acc:HGNC:10367]
ENSG00000005194	1771.47	1773.67	1816.2	1446.49	1396.24	1465.5	1787.11	1436.08	0.314968	5.1158e-10	5.91864e-09	CIAPIN1	protein_coding	cytokine induced apoptosis inhibitor 1 [Source:HGNC Symbol;Acc:HGNC:28050]
ENSG00000128422	148.757	116.617	167.503	38.2294	53.2916	68.0192	144.293	53.1801	1.44546	5.21269e-10	6.02651e-09	KRT17	protein_coding	keratin 17 [Source:HGNC Symbol;Acc:HGNC:6427]
ENSG00000162407	903.02	913.954	924.955	1259.79	1194.8	1146.02	913.977	1200.2	-0.394122	5.23694e-10	6.05032e-09	PLPP3	protein_coding	phospholipid phosphatase 3 [Source:HGNC Symbol;Acc:HGNC:9229]
ENSG00000170903	687.217	808.185	757.452	536.99	522.257	511.174	750.951	523.474	0.52142	5.32722e-10	6.15032e-09	MSANTD4	protein_coding	Myb/SANT DNA binding domain containing 4 with coiled-coils [Source:HGNC Symbol;Acc:HGNC:29383]
ENSG00000114796	1689.76	1708.58	1668.71	2054.61	2087.96	2051.91	1689.02	2064.83	-0.289359	5.33632e-10	6.15652e-09	KLHL24	protein_coding	kelch like family member 24 [Source:HGNC Symbol;Acc:HGNC:25947]
ENSG00000166483	1054.92	1110.12	1132.49	1378.04	1388.78	1512.91	1099.18	1426.58	-0.375393	5.48005e-10	6.31793e-09	WEE1	protein_coding	WEE1 G2 checkpoint kinase [Source:HGNC Symbol;Acc:HGNC:12761]
ENSG00000143756	1004.64	938.363	1031.36	1240.23	1364.26	1302.67	991.452	1302.39	-0.393706	5.77268e-10	6.65066e-09	FBXO28	protein_coding	F-box protein 28 [Source:HGNC Symbol;Acc:HGNC:29046]
ENSG00000042493	1057.02	1150.81	1139.87	859.717	852.665	802.832	1115.9	838.405	0.412575	5.78529e-10	6.66054e-09	CAPG	protein_coding	capping actin protein, gelsolin like [Source:HGNC Symbol;Acc:HGNC:1474]
ENSG00000205426	53.427	68.7048	70.5831	8.0015	15.9875	16.4895	64.2383	13.4928	2.2713	5.89767e-10	6.7852e-09	KRT81	protein_coding	keratin 81 [Source:HGNC Symbol;Acc:HGNC:6458]
ENSG00000173812	7601.29	7101	7399.64	6426.1	6315.05	6586.52	7367.31	6442.56	0.192974	5.93818e-10	6.82704e-09	EIF1	protein_coding	eukaryotic translation initiation factor 1 [Source:HGNC Symbol;Acc:HGNC:3249]
ENSG00000134250	3253.81	3188.44	3022.43	3747.37	3661.13	3750.33	3154.89	3719.61	-0.23751	5.97068e-10	6.85964e-09	NOTCH2	protein_coding	notch 2 [Source:HGNC Symbol;Acc:HGNC:7882]
ENSG00000087263	1415.29	1453.65	1376.9	1078.43	1120.19	1125.41	1415.28	1108.01	0.354485	6.00385e-10	6.89296e-09	OGFOD1	protein_coding	2-oxoglutarate and iron dependent oxygenase domain containing 1 [Source:HGNC Symbol;Acc:HGNC:25585]
ENSG00000159267	335.228	339.004	332.9	484.536	533.981	509.113	335.71	509.21	-0.59944	6.06042e-10	6.95307e-09	HLCS	protein_coding	holocarboxylase synthetase [Source:HGNC Symbol;Acc:HGNC:4976]
ENSG00000154222	469.319	461.949	428.766	665.903	655.486	636.907	453.345	652.765	-0.525785	6.20075e-10	7.10914e-09	CC2D1B	protein_coding	coiled-coil and C2 domain containing 1B [Source:HGNC Symbol;Acc:HGNC:29386]
ENSG00000103381	1204.73	1237.59	1250.48	1565.63	1610.47	1501.57	1230.93	1559.22	-0.34088	6.31697e-10	7.23736e-09	CPPED1	protein_coding	calcineurin like phosphoesterase domain containing 1 [Source:HGNC Symbol;Acc:HGNC:25632]
ENSG00000101745	635.885	683.432	623.66	926.396	872.916	868.79	647.659	889.368	-0.457029	6.59028e-10	7.54526e-09	ANKRD12	protein_coding	ankyrin repeat domain 12 [Source:HGNC Symbol;Acc:HGNC:29135]
ENSG00000055211	820.261	913.954	873.335	645.455	591.536	643.09	869.183	626.694	0.471853	6.60331e-10	7.55494e-09	GINM1	protein_coding	glycoprotein integral membrane 1 [Source:HGNC Symbol;Acc:HGNC:21074]
ENSG00000130725	2503.73	2195.84	2313.44	1891.02	1908.9	1811.78	2337.67	1870.57	0.320529	6.68486e-10	7.64295e-09	UBE2M	protein_coding	ubiquitin conjugating enzyme E2 M [Source:HGNC Symbol;Acc:HGNC:12491]
ENSG00000117153	371.893	377.876	391.894	595.668	546.771	549.306	380.555	563.915	-0.568978	6.81575e-10	7.78721e-09	KLHL12	protein_coding	kelch like family member 12 [Source:HGNC Symbol;Acc:HGNC:19360]
ENSG00000131508	2078.41	1997.86	2124.87	2490.25	2472.73	2516.71	2067.05	2493.23	-0.271277	6.85023e-10	7.82119e-09	UBE2D2	protein_coding	ubiquitin conjugating enzyme E2 D2 [Source:HGNC Symbol;Acc:HGNC:12475]
ENSG00000101346	2228.22	2257.31	2239.7	1813.67	1864.14	1873.62	2241.74	1850.48	0.27742	6.98665e-10	7.97144e-09	POFUT1	protein_coding	protein O-fucosyltransferase 1 [Source:HGNC Symbol;Acc:HGNC:14988]
ENSG00000081923	3210.86	3290.6	3057.2	3690.47	3791.16	3785.37	3186.22	3755.67	-0.236178	7.18829e-10	8.19585e-09	ATP8B1	protein_coding	ATPase phospholipid transporting 8B1 [Source:HGNC Symbol;Acc:HGNC:3706]
ENSG00000174106	583.506	646.367	564.665	810.819	839.875	856.423	598.18	835.706	-0.479693	7.5237e-10	8.57235e-09	LEMD3	protein_coding	LEM domain containing 3 [Source:HGNC Symbol;Acc:HGNC:28887]
ENSG00000170906	773.119	713.264	754.291	553.882	531.85	494.685	746.892	526.806	0.501395	7.5555e-10	8.60265e-09	NDUFA3	protein_coding	NADH:ubiquinone oxidoreductase subunit A3 [Source:HGNC Symbol;Acc:HGNC:7686]
ENSG00000124201	7554.15	7788.95	7735.7	8616.73	8473.36	8811.58	7692.94	8633.89	-0.166306	7.76557e-10	8.83574e-09	ZNFX1	protein_coding	zinc finger NFX1-type containing 1 [Source:HGNC Symbol;Acc:HGNC:29271]
ENSG00000197746	45580.5	45631.7	46243.5	50200.6	49430.1	48664.6	45818.6	49431.7	-0.109628	8.04917e-10	9.15212e-09	PSAP	protein_coding	prosaposin [Source:HGNC Symbol;Acc:HGNC:9498]
ENSG00000166439	488.176	495.398	549.916	755.698	723.699	700.804	511.163	726.734	-0.509366	8.09785e-10	9.19539e-09	RNF169	protein_coding	ring finger protein 169 [Source:HGNC Symbol;Acc:HGNC:26961]
ENSG00000146802	580.363	627.383	611.018	850.827	822.822	825.506	606.255	833.051	-0.45807	8.09835e-10	9.19539e-09	TMEM168	protein_coding	transmembrane protein 168 [Source:HGNC Symbol;Acc:HGNC:25826]
ENSG00000133065	988.922	988.987	946.025	715.69	692.79	762.639	974.645	723.707	0.429841	8.29686e-10	9.41432e-09	SLC41A1	protein_coding	solute carrier family 41 member 1 [Source:HGNC Symbol;Acc:HGNC:19429]
ENSG00000164880	9194.67	8588.1	8356.2	7741.9	7430.97	7517.15	8712.99	7563.34	0.203699	8.33511e-10	9.45122e-09	INTS1	protein_coding	integrator complex subunit 1 [Source:HGNC Symbol;Acc:HGNC:24555]
ENSG00000108654	13514.9	13669.5	13592	14821.5	14837.4	14922	13592.2	14860.3	-0.128563	8.43234e-10	9.55492e-09	DDX5	protein_coding	DEAD-box helicase 5 [Source:HGNC Symbol;Acc:HGNC:2746]
ENSG00000169020	434.749	389.628	463.531	272.94	267.524	264.863	429.303	268.442	0.674955	8.49312e-10	9.6172e-09	ATP5ME	protein_coding	ATP synthase membrane subunit e [Source:HGNC Symbol;Acc:HGNC:846]
ENSG00000196465	703.979	658.119	706.885	499.65	463.637	487.471	689.661	483.586	0.509929	8.55344e-10	9.67886e-09	MYL6B	protein_coding	myosin light chain 6B [Source:HGNC Symbol;Acc:HGNC:29823]
ENSG00000140320	1373.39	1154.42	1173.58	1583.41	1585.96	1731.4	1233.79	1633.59	-0.405701	8.63341e-10	9.76267e-09	BAHD1	protein_coding	bromo adjacent homology domain containing 1 [Source:HGNC Symbol;Acc:HGNC:29153]
ENSG00000214193	1033.97	1012.49	1007.13	774.368	784.452	739.966	1017.86	766.262	0.409386	8.70481e-10	9.83668e-09	SH3D21	protein_coding	SH3 domain containing 21 [Source:HGNC Symbol;Acc:HGNC:26236]
ENSG00000130985	7197.97	7324.29	7219.5	8117.97	8310.29	7976.79	7247.25	8135.02	-0.1664	8.76934e-10	9.90282e-09	UBA1	protein_coding	ubiquitin like modifier activating enzyme 1 [Source:HGNC Symbol;Acc:HGNC:12469]
ENSG00000135655	977.399	975.427	946.025	761.921	688.527	691.528	966.284	713.992	0.434822	9.08117e-10	1.02479e-08	USP15	protein_coding	ubiquitin specific peptidase 15 [Source:HGNC Symbol;Acc:HGNC:12613]
ENSG00000136709	1477.1	1476.25	1490.67	1868.8	1809.78	1805.6	1481.34	1828.06	-0.304053	9.09161e-10	1.02527e-08	WDR33	protein_coding	WD repeat domain 33 [Source:HGNC Symbol;Acc:HGNC:25651]
ENSG00000043039	769.977	718.688	750.078	1001.97	992.289	987.309	746.247	993.855	-0.41458	9.21751e-10	1.03876e-08	BARX2	protein_coding	BARX homeobox 2 [Source:HGNC Symbol;Acc:HGNC:956]
ENSG00000166734	2163.27	2201.26	2339.78	1739.88	1888.65	1802.51	2234.77	1810.35	0.304584	9.2653e-10	1.04344e-08	CASC4	protein_coding	cancer susceptibility 4 [Source:HGNC Symbol;Acc:HGNC:24892]
ENSG00000117868	4320.25	4365.47	4326.64	5093.4	4956.11	4875.74	4337.45	4975.09	-0.198201	9.37781e-10	1.05539e-08	ESYT2	protein_coding	extended synaptotagmin 2 [Source:HGNC Symbol;Acc:HGNC:22211]
ENSG00000063245	2625.25	2269.07	2421.95	1974.59	1924.89	1966.37	2438.76	1955.29	0.317475	9.54032e-10	1.07294e-08	EPN1	protein_coding	epsin 1 [Source:HGNC Symbol;Acc:HGNC:21604]
ENSG00000106609	3438.18	3409.02	3455.41	2830.75	2977.93	2961.93	3434.21	2923.54	0.232914	9.56931e-10	1.07547e-08	TMEM248	protein_coding	transmembrane protein 248 [Source:HGNC Symbol;Acc:HGNC:25476]
ENSG00000161513	1308.44	1206.85	1422.2	1037.53	963.511	918.259	1312.5	973.1	0.42902	9.67193e-10	1.08627e-08	FDXR	protein_coding	ferredoxin reductase [Source:HGNC Symbol;Acc:HGNC:3642]
ENSG00000168256	1475	1378.62	1441.16	1081.98	1152.16	1124.38	1431.59	1119.51	0.354972	9.71902e-10	1.09082e-08	NKIRAS2	protein_coding	NFKB inhibitor interacting Ras like 2 [Source:HGNC Symbol;Acc:HGNC:17898]
ENSG00000185164	2556.11	2335.96	2392.45	2031.49	1863.07	2001.41	2428.18	1965.33	0.303593	9.81376e-10	1.1007e-08	NOMO2	protein_coding	NODAL modulator 2 [Source:HGNC Symbol;Acc:HGNC:22652]
ENSG00000137145	2983.53	3007.64	2997.15	3432.65	3494.86	3618.41	2996.11	3515.31	-0.230037	1.02152e-09	1.14495e-08	DENND4C	protein_coding	DENN domain containing 4C [Source:HGNC Symbol;Acc:HGNC:26079]
ENSG00000135953	724.93	734.056	678.441	528.988	470.032	501.899	712.476	500.306	0.508823	1.06479e-09	1.19263e-08	MFSD9	protein_coding	major facilitator superfamily domain containing 9 [Source:HGNC Symbol;Acc:HGNC:28158]
ENSG00000172059	939.686	1002.55	877.549	708.578	652.289	694.62	939.927	685.162	0.456352	1.09811e-09	1.22912e-08	KLF11	protein_coding	Kruppel like factor 11 [Source:HGNC Symbol;Acc:HGNC:11811]
ENSG00000204673	1988.32	1793.56	1850.96	1507.84	1509.22	1488.18	1877.61	1501.74	0.321346	1.11253e-09	1.24442e-08	AKT1S1	protein_coding	AKT1 substrate 1 [Source:HGNC Symbol;Acc:HGNC:28426]
ENSG00000164611	493.414	555.966	539.382	731.693	757.806	745.119	529.587	744.873	-0.490346	1.12283e-09	1.25509e-08	PTTG1	protein_coding	pituitary tumor-transforming 1 [Source:HGNC Symbol;Acc:HGNC:9690]
ENSG00000167705	733.311	760.273	738.489	534.323	526.521	546.215	744.024	535.686	0.474429	1.12735e-09	1.25929e-08	RILP	protein_coding	Rab interacting lysosomal protein [Source:HGNC Symbol;Acc:HGNC:30266]
ENSG00000166783	1962.13	1976.17	1965.79	2352.44	2353.36	2387.89	1968.03	2364.56	-0.264624	1.14538e-09	1.27856e-08	MARF1	protein_coding	meiosis regulator and mRNA stability factor 1 [Source:HGNC Symbol;Acc:HGNC:29562]
ENSG00000147224	1426.81	1320.76	1434.84	1125.55	1065.83	1040.9	1394.14	1077.43	0.369624	1.16829e-09	1.30327e-08	PRPS1	protein_coding	phosphoribosyl pyrophosphate synthetase 1 [Source:HGNC Symbol;Acc:HGNC:9462]
ENSG00000174132	656.837	649.983	655.264	465.865	471.097	442.125	654.028	459.696	0.508313	1.17061e-09	1.30497e-08	FAM174A	protein_coding	family with sequence similarity 174 member A [Source:HGNC Symbol;Acc:HGNC:24943]
ENSG00000109654	224.184	247.699	218.07	366.291	371.975	383.381	229.984	373.882	-0.698305	1.21973e-09	1.35881e-08	TRIM2	protein_coding	tripartite motif containing 2 [Source:HGNC Symbol;Acc:HGNC:15974]
ENSG00000147100	775.215	746.712	769.04	566.329	564.891	498.807	763.656	543.342	0.489736	1.24457e-09	1.38555e-08	SLC16A2	protein_coding	solute carrier family 16 member 2 [Source:HGNC Symbol;Acc:HGNC:10923]
ENSG00000168014	939.686	903.106	910.206	695.242	650.157	694.62	917.666	680.006	0.431199	1.25266e-09	1.39362e-08	C2CD3	protein_coding	C2 calcium dependent domain containing 3 [Source:HGNC Symbol;Acc:HGNC:24564]
ENSG00000109670	394.94	413.133	404.536	552.104	606.458	622.479	404.203	593.68	-0.552424	1.30438e-09	1.44994e-08	FBXW7	protein_coding	F-box and WD repeat domain containing 7 [Source:HGNC Symbol;Acc:HGNC:16712]
ENSG00000012171	1977.84	1971.65	1934.19	2377.34	2338.43	2354.91	1961.23	2356.89	-0.265215	1.30504e-09	1.44994e-08	SEMA3B	protein_coding	semaphorin 3B [Source:HGNC Symbol;Acc:HGNC:10724]
ENSG00000151491	469.319	447.485	416.124	707.689	609.655	634.846	444.31	650.73	-0.552197	1.31336e-09	1.45821e-08	EPS8	protein_coding	epidermal growth factor receptor pathway substrate 8 [Source:HGNC Symbol;Acc:HGNC:3420]
ENSG00000179271	1619.57	1552.19	1553.88	1242.01	1239.56	1284.12	1575.21	1255.23	0.327478	1.31867e-09	1.46311e-08	GADD45GIP1	protein_coding	GADD45G interacting protein 1 [Source:HGNC Symbol;Acc:HGNC:29996]
ENSG00000182504	703.979	766.601	679.494	501.428	496.677	520.45	716.691	506.185	0.503314	1.34155e-09	1.4875e-08	CEP97	protein_coding	centrosomal protein 97 [Source:HGNC Symbol;Acc:HGNC:26244]
ENSG00000054965	1792.42	1814.35	1767.74	1466.94	1471.91	1409.85	1791.5	1449.57	0.305627	1.38807e-09	1.53804e-08	FAM168A	protein_coding	family with sequence similarity 168 member A [Source:HGNC Symbol;Acc:HGNC:28999]
ENSG00000145431	623.314	667.16	636.302	848.16	859.06	931.657	642.259	879.625	-0.452095	1.40435e-09	1.55505e-08	PDGFC	protein_coding	platelet derived growth factor C [Source:HGNC Symbol;Acc:HGNC:8801]
ENSG00000168907	54.4745	64.1847	53.7275	135.137	126.834	150.467	57.4622	137.479	-1.25449	1.42599e-09	1.57794e-08	PLA2G4F	protein_coding	phospholipase A2 group IVF [Source:HGNC Symbol;Acc:HGNC:27396]
ENSG00000135052	1514.81	1601	1596.02	1941.7	2015.49	1875.68	1570.61	1944.29	-0.307282	1.44833e-09	1.6016e-08	GOLM1	protein_coding	golgi membrane protein 1 [Source:HGNC Symbol;Acc:HGNC:15451]
ENSG00000100347	841.213	899.49	865.96	625.006	657.618	638.968	868.888	640.531	0.441509	1.45226e-09	1.60486e-08	SAMM50	protein_coding	SAMM50 sorting and assembly machinery component [Source:HGNC Symbol;Acc:HGNC:24276]
ENSG00000166068	336.276	322.732	347.648	479.201	509.467	528.695	335.552	505.788	-0.591951	1.46005e-09	1.6124e-08	SPRED1	protein_coding	sprouty related EVH1 domain containing 1 [Source:HGNC Symbol;Acc:HGNC:20249]
ENSG00000091136	5618.21	5839	5710.91	6384.31	6461.07	6626.72	5722.71	6490.7	-0.181039	1.46328e-09	1.61489e-08	LAMB1	protein_coding	laminin subunit beta 1 [Source:HGNC Symbol;Acc:HGNC:6486]
ENSG00000114030	841.213	867.85	811.179	1090.87	1158.56	1074.91	840.081	1108.11	-0.398072	1.48508e-09	1.63785e-08	KPNA1	protein_coding	karyopherin subunit alpha 1 [Source:HGNC Symbol;Acc:HGNC:6394]
ENSG00000132849	2545.64	2710.22	2540.99	3057.46	3041.88	3264.92	2598.95	3121.42	-0.263194	1.48949e-09	1.64162e-08	PATJ	protein_coding	PATJ, crumbs cell polarity complex component [Source:HGNC Symbol;Acc:HGNC:28881]
ENSG00000108784	263.992	248.603	265.477	407.188	410.345	402.962	259.357	406.832	-0.650739	1.50228e-09	1.65462e-08	NAGLU	protein_coding	N-acetyl-alpha-glucosaminidase [Source:HGNC Symbol;Acc:HGNC:7632]
ENSG00000181274	433.701	433.021	438.248	287.165	250.47	294.75	434.99	277.462	0.646963	1.50433e-09	1.65565e-08	FRAT2	protein_coding	FRAT2, WNT signaling pathway regulator [Source:HGNC Symbol;Acc:HGNC:16048]
ENSG00000182095	6893.12	6415.76	5938.47	7544.53	7521.57	7619.18	6415.78	7561.76	-0.23706	1.50523e-09	1.65565e-08	TNRC18	protein_coding	trinucleotide repeat containing 18 [Source:HGNC Symbol;Acc:HGNC:11962]
ENSG00000106665	1283.29	1223.13	1167.26	918.395	962.446	941.963	1224.56	940.934	0.380839	1.50868e-09	1.65835e-08	CLIP2	protein_coding	CAP-Gly domain containing linker protein 2 [Source:HGNC Symbol;Acc:HGNC:2586]
ENSG00000100138	1864.71	1898.42	1906.8	1584.3	1530.53	1483.02	1889.98	1532.62	0.301622	1.52235e-09	1.67225e-08	SNU13	protein_coding	small nuclear ribonucleoprotein 13 [Source:HGNC Symbol;Acc:HGNC:7819]
ENSG00000130940	249.326	266.683	249.675	388.518	399.687	425.635	255.228	404.613	-0.662617	1.54751e-09	1.69876e-08	CASZ1	protein_coding	castor zinc finger 1 [Source:HGNC Symbol;Acc:HGNC:26002]
ENSG00000148334	2014.51	1930.97	2025.84	1626.97	1648.84	1598.45	1990.44	1624.75	0.292258	1.61075e-09	1.76701e-08	PTGES2	protein_coding	prostaglandin E synthase 2 [Source:HGNC Symbol;Acc:HGNC:17822]
ENSG00000177469	1777.76	1735.7	1760.36	1475.83	1400.5	1342.86	1757.94	1406.4	0.320436	1.6127e-09	1.76797e-08	CAVIN1	protein_coding	caveolae associated protein 1 [Source:HGNC Symbol;Acc:HGNC:9688]
ENSG00000021574	368.751	382.396	352.916	576.997	561.693	508.083	368.021	548.924	-0.576657	1.61395e-09	1.76818e-08	SPAST	protein_coding	spastin [Source:HGNC Symbol;Acc:HGNC:11233]
ENSG00000135698	905.115	898.586	914.42	695.242	634.17	682.253	906.041	670.555	0.432713	1.65799e-09	1.81522e-08	MPHOSPH6	protein_coding	M-phase phosphoprotein 6 [Source:HGNC Symbol;Acc:HGNC:7214]
ENSG00000131791	635.885	653.599	619.446	863.273	862.257	856.423	636.31	860.651	-0.434972	1.71047e-09	1.87053e-08	PRKAB2	protein_coding	protein kinase AMP-activated non-catalytic subunit beta 2 [Source:HGNC Symbol;Acc:HGNC:9379]
ENSG00000165507	495.509	467.373	445.622	742.362	619.248	689.467	469.501	683.692	-0.544254	1.71078e-09	1.87053e-08	DEPP1	protein_coding	DEPP1, autophagy regulator [Source:HGNC Symbol;Acc:HGNC:23355]
ENSG00000109089	2930.1	2728.3	2743.26	3283.28	3413.86	3272.13	2800.56	3323.09	-0.246992	1.71518e-09	1.87411e-08	CDR2L	protein_coding	cerebellar degeneration related protein 2 like [Source:HGNC Symbol;Acc:HGNC:29999]
ENSG00000275993	399.131	305.555	306.563	208.039	187.586	162.834	337.083	186.153	0.85244	1.72238e-09	1.88073e-08	SIK1B	protein_coding	salt inducible kinase 1B (putative) [Source:HGNC Symbol;Acc:HGNC:52389]
ENSG00000164466	2257.55	2322.4	2341.89	1843.01	1992.04	1851.98	2307.28	1895.68	0.284479	1.72548e-09	1.88287e-08	SFXN1	protein_coding	sideroflexin 1 [Source:HGNC Symbol;Acc:HGNC:16085]
ENSG00000197562	1388.05	1401.22	1369.52	1094.43	1131.91	1026.47	1386.26	1084.27	0.354736	1.7757e-09	1.93639e-08	RAB40C	protein_coding	RAB40C, member RAS oncogene family [Source:HGNC Symbol;Acc:HGNC:18285]
ENSG00000186635	1863.66	1719.43	1801.45	2204.86	2172.16	2180.74	1794.85	2185.92	-0.285572	1.78515e-09	1.94541e-08	ARAP1	protein_coding	ArfGAP with RhoGAP domain, ankyrin repeat and PH domain 1 [Source:HGNC Symbol;Acc:HGNC:16925]
ENSG00000197386	3638.27	3651.3	3566.03	3111.7	3072.79	3149.49	3618.53	3111.33	0.218006	1.7923e-09	1.95192e-08	HTT	protein_coding	huntingtin [Source:HGNC Symbol;Acc:HGNC:4851]
ENSG00000159256	372.941	408.613	343.434	533.434	562.759	593.622	374.996	563.271	-0.583529	1.84953e-09	2.01292e-08	MORC3	protein_coding	MORC family CW-type zinc finger 3 [Source:HGNC Symbol;Acc:HGNC:23572]
ENSG00000110104	781.5	787.393	860.693	614.338	581.944	542.092	809.862	579.458	0.480909	1.86717e-09	2.03077e-08	CCDC86	protein_coding	coiled-coil domain containing 86 [Source:HGNC Symbol;Acc:HGNC:28359]
ENSG00000100938	1473.96	1452.74	1402.18	1149.55	1128.72	1150.14	1442.96	1142.8	0.336404	1.88221e-09	2.04579e-08	GMPR2	protein_coding	guanosine monophosphate reductase 2 [Source:HGNC Symbol;Acc:HGNC:4377]
ENSG00000090266	1381.77	1450.94	1484.35	1077.54	1162.82	1143.96	1439.02	1128.11	0.352577	1.88586e-09	2.04841e-08	NDUFB2	protein_coding	NADH:ubiquinone oxidoreductase subunit B2 [Source:HGNC Symbol;Acc:HGNC:7697]
ENSG00000101096	213.708	214.25	195.947	351.177	328.276	347.31	207.968	342.254	-0.718503	1.89338e-09	2.05523e-08	NFATC2	protein_coding	nuclear factor of activated T cells 2 [Source:HGNC Symbol;Acc:HGNC:7776]
ENSG00000129003	1724.33	1751.97	1739.3	2096.39	2106.08	2111.69	1738.53	2104.72	-0.275468	1.91876e-09	2.0814e-08	VPS13C	protein_coding	vacuolar protein sorting 13 homolog C [Source:HGNC Symbol;Acc:HGNC:23594]
ENSG00000169446	912.449	923.898	1012.39	710.356	709.844	692.559	949.58	704.253	0.430402	1.92678e-09	2.08874e-08	MMGT1	protein_coding	membrane magnesium transporter 1 [Source:HGNC Symbol;Acc:HGNC:28100]
ENSG00000090581	1799.76	1724.85	1691.89	1416.27	1401.57	1387.18	1738.83	1401.67	0.31056	1.97643e-09	2.14115e-08	GNPTG	protein_coding	N-acetylglucosamine-1-phosphate transferase subunit gamma [Source:HGNC Symbol;Acc:HGNC:23026]
ENSG00000136636	2064.79	1987.01	2073.25	1643.86	1647.77	1720.06	2041.69	1670.57	0.289153	2.04055e-09	2.20917e-08	KCTD3	protein_coding	potassium channel tetramerization domain containing 3 [Source:HGNC Symbol;Acc:HGNC:21305]
ENSG00000196233	625.41	609.303	593.109	833.935	879.311	792.527	609.274	835.257	-0.454804	2.09881e-09	2.27076e-08	LCOR	protein_coding	ligand dependent nuclear receptor corepressor [Source:HGNC Symbol;Acc:HGNC:29503]
ENSG00000084754	3168.95	3358.4	3168.87	2741.85	2733.86	2748.59	3232.07	2741.43	0.238285	2.1537e-09	2.32774e-08	HADHA	protein_coding	hydroxyacyl-CoA dehydrogenase trifunctional multienzyme complex subunit alpha [Source:HGNC Symbol;Acc:HGNC:4801]
ENSG00000103269	410.654	410.421	431.927	233.822	267.524	287.536	417.667	262.96	0.670281	2.1543e-09	2.32774e-08	RHBDL1	protein_coding	rhomboid like 1 [Source:HGNC Symbol;Acc:HGNC:10007]
ENSG00000035403	7347.78	7387.57	7561.88	6729.27	6612.42	6511.29	7432.41	6617.66	0.167082	2.19335e-09	2.36811e-08	VCL	protein_coding	vinculin [Source:HGNC Symbol;Acc:HGNC:12665]
ENSG00000099821	1955.85	1827	1825.68	1542.51	1480.44	1505.7	1869.51	1509.55	0.307479	2.19452e-09	2.36811e-08	POLRMT	protein_coding	RNA polymerase mitochondrial [Source:HGNC Symbol;Acc:HGNC:9200]
ENSG00000106392	1037.11	1044.13	1061.91	1372.7	1321.63	1305.76	1047.72	1333.37	-0.348629	2.21223e-09	2.38565e-08	C1GALT1	protein_coding	core 1 synthase, glycoprotein-N-acetylgalactosamine 3-beta-galactosyltransferase 1 [Source:HGNC Symbol;Acc:HGNC:24337]
ENSG00000083799	560.459	596.647	585.735	771.701	846.27	787.374	580.947	801.781	-0.463019	2.2714e-09	2.44787e-08	CYLD	protein_coding	CYLD lysine 63 deubiquitinase [Source:HGNC Symbol;Acc:HGNC:2584]
ENSG00000164403	375.036	357.084	304.456	558.327	522.257	501.899	345.525	527.495	-0.610538	2.28067e-09	2.45625e-08	SHROOM1	protein_coding	shroom family member 1 [Source:HGNC Symbol;Acc:HGNC:24084]
ENSG00000140983	4491.01	4249.75	4164.41	3812.27	3585.46	3557.61	4301.72	3651.78	0.235353	2.38566e-09	2.56765e-08	RHOT2	protein_coding	ras homolog family member T2 [Source:HGNC Symbol;Acc:HGNC:21169]
ENSG00000177570	1686.62	1781.8	1695.05	2038.61	2126.33	2150.85	1721.16	2105.26	-0.289099	2.40308e-09	2.58472e-08	SAMD12	protein_coding	sterile alpha motif domain containing 12 [Source:HGNC Symbol;Acc:HGNC:31750]
ENSG00000105141	184.375	211.538	202.268	332.507	341.066	320.515	199.394	331.363	-0.730913	2.45009e-09	2.63357e-08	CASP14	protein_coding	caspase 14 [Source:HGNC Symbol;Acc:HGNC:1502]
ENSG00000137106	3420.37	3474.11	3553.39	3073.47	2932.1	2769.21	3482.62	2924.92	0.25081	2.52428e-09	2.71155e-08	GRHPR	protein_coding	glyoxylate and hydroxypyruvate reductase [Source:HGNC Symbol;Acc:HGNC:4570]
ENSG00000109111	5159.37	5302.02	5342.2	5940.67	5972.92	5952.71	5267.86	5955.43	-0.176808	2.53239e-09	2.71706e-08	SUPT6H	protein_coding	SPT6 homolog, histone chaperone [Source:HGNC Symbol;Acc:HGNC:11470]
ENSG00000089220	4335.96	4470.33	4517.32	3930.52	3789.03	3836.9	4441.21	3852.15	0.204896	2.5327e-09	2.71706e-08	PEBP1	protein_coding	phosphatidylethanolamine binding protein 1 [Source:HGNC Symbol;Acc:HGNC:8630]
ENSG00000077514	867.402	874.178	829.089	657.902	583.01	637.937	856.89	626.283	0.451036	2.62556e-09	2.81485e-08	POLD3	protein_coding	DNA polymerase delta 3, accessory subunit [Source:HGNC Symbol;Acc:HGNC:20932]
ENSG00000101247	351.989	324.54	343.434	204.483	206.771	212.302	339.988	207.852	0.709364	2.67608e-09	2.86715e-08	NDUFAF5	protein_coding	NADH:ubiquinone oxidoreductase complex assembly factor 5 [Source:HGNC Symbol;Acc:HGNC:15899]
ENSG00000181885	7429.49	7088.34	7459.69	6623.47	6382.2	6372.16	7325.84	6459.28	0.180692	2.71705e-09	2.90917e-08	CLDN7	protein_coding	claudin 7 [Source:HGNC Symbol;Acc:HGNC:2049]
ENSG00000198792	1885.66	1889.38	1754.04	1475.83	1512.41	1485.09	1843.03	1491.11	0.306564	2.813e-09	3.00995e-08	TMEM184B	protein_coding	transmembrane protein 184B [Source:HGNC Symbol;Acc:HGNC:1310]
ENSG00000092330	505.985	491.782	476.173	651.678	724.765	704.926	491.313	693.79	-0.49629	2.94457e-09	3.14869e-08	TINF2	protein_coding	TERF1 interacting nuclear factor 2 [Source:HGNC Symbol;Acc:HGNC:11824]
ENSG00000137959	3333.42	3559.99	3507.03	3991.86	3985.14	4201.73	3466.82	4059.58	-0.22702	2.95212e-09	3.15472e-08	IFI44L	protein_coding	interferon induced protein 44 like [Source:HGNC Symbol;Acc:HGNC:17817]
ENSG00000106012	1697.09	1683.27	1621.31	1319.36	1388.78	1312.98	1667.22	1340.37	0.315637	2.98029e-09	3.18238e-08	IQCE	protein_coding	IQ motif containing E [Source:HGNC Symbol;Acc:HGNC:29171]
ENSG00000146409	741.692	707.84	724.794	536.99	479.624	534.878	724.775	517.164	0.484949	2.98186e-09	3.18238e-08	SLC18B1	protein_coding	solute carrier family 18 member B1 [Source:HGNC Symbol;Acc:HGNC:21573]
ENSG00000184985	2464.97	2369.41	2262.87	1934.59	1903.57	2004.5	2365.75	1947.56	0.280725	2.98845e-09	3.18736e-08	SORCS2	protein_coding	sortilin related VPS10 domain containing receptor 2 [Source:HGNC Symbol;Acc:HGNC:16698]
ENSG00000147799	1113.59	1054.08	961.827	801.04	741.818	782.221	1043.16	775.026	0.427899	3.00801e-09	3.20413e-08	ARHGAP39	protein_coding	Rho GTPase activating protein 39 [Source:HGNC Symbol;Acc:HGNC:29351]
ENSG00000132305	2306.79	2382.07	2473.57	1959.48	2003.76	1982.86	2387.47	1982.03	0.268751	3.00805e-09	3.20413e-08	IMMT	protein_coding	inner membrane mitochondrial protein [Source:HGNC Symbol;Acc:HGNC:6047]
ENSG00000126522	527.984	531.558	580.467	732.582	767.398	772.945	546.67	757.642	-0.470879	3.07728e-09	3.27517e-08	ASL	protein_coding	argininosuccinate lyase [Source:HGNC Symbol;Acc:HGNC:746]
ENSG00000134013	2422.02	2470.66	2455.66	1909.69	2155.11	1940.61	2449.45	2001.8	0.292536	3.07871e-09	3.27517e-08	LOXL2	protein_coding	lysyl oxidase like 2 [Source:HGNC Symbol;Acc:HGNC:6666]
ENSG00000120802	2745.73	2729.21	2681.11	3189.93	3131.41	3228.85	2718.68	3183.4	-0.227682	3.15165e-09	3.35061e-08	TMPO	protein_coding	thymopoietin [Source:HGNC Symbol;Acc:HGNC:11875]
ENSG00000133606	2007.18	2180.47	2269.2	2559.59	2618.75	2702.22	2152.28	2626.85	-0.286866	3.2344e-09	3.43636e-08	MKRN1	protein_coding	makorin ring finger protein 1 [Source:HGNC Symbol;Acc:HGNC:7112]
ENSG00000128609	1603.86	1743.84	1631.84	2099.06	1963.26	2082.83	1659.84	2048.38	-0.302968	3.31594e-09	3.52073e-08	NDUFA5	protein_coding	NADH:ubiquinone oxidoreductase subunit A5 [Source:HGNC Symbol;Acc:HGNC:7688]
ENSG00000113460	1988.32	2030.41	2074.3	1694.54	1648.84	1670.59	2031.01	1671.32	0.280756	3.33409e-09	3.53773e-08	BRIX1	protein_coding	BRX1, biogenesis of ribosomes [Source:HGNC Symbol;Acc:HGNC:24170]
ENSG00000196781	667.313	684.336	636.302	895.279	875.047	897.647	662.65	889.325	-0.423763	3.33744e-09	3.53901e-08	TLE1	protein_coding	transducin like enhancer of split 1 [Source:HGNC Symbol;Acc:HGNC:11837]
ENSG00000184076	897.782	945.595	938.65	719.246	624.577	703.895	927.342	682.573	0.440708	3.35143e-09	3.55157e-08	UQCR10	protein_coding	ubiquinol-cytochrome c reductase, complex III subunit X [Source:HGNC Symbol;Acc:HGNC:30863]
ENSG00000123191	1543.1	1484.38	1412.72	1843.9	1831.1	1809.72	1480.07	1828.24	-0.304851	3.35442e-09	3.55246e-08	ATP7B	protein_coding	ATPase copper transporting beta [Source:HGNC Symbol;Acc:HGNC:870]
ENSG00000115295	419.035	396.861	410.857	571.663	585.141	607.02	408.918	587.941	-0.524114	3.4233e-09	3.62309e-08	CLIP4	protein_coding	CAP-Gly domain containing linker protein family member 4 [Source:HGNC Symbol;Acc:HGNC:26108]
ENSG00000117054	1233.01	1200.53	1246.27	1005.52	916.615	911.045	1226.6	944.394	0.375009	3.46394e-09	3.66374e-08	ACADM	protein_coding	acyl-CoA dehydrogenase medium chain [Source:HGNC Symbol;Acc:HGNC:89]
ENSG00000130811	2937.43	2870.23	2880.21	2551.59	2376.8	2325.02	2895.96	2417.8	0.258989	3.49502e-09	3.69425e-08	EIF3G	protein_coding	eukaryotic translation initiation factor 3 subunit G [Source:HGNC Symbol;Acc:HGNC:3274]
ENSG00000132953	1074.82	1136.34	1118.8	830.378	814.295	896.616	1109.99	847.097	0.390701	3.57498e-09	3.77635e-08	XPO4	protein_coding	exportin 4 [Source:HGNC Symbol;Acc:HGNC:17796]
ENSG00000168615	2642.02	2826.84	2914.98	2299.1	2334.17	2351.81	2794.61	2328.36	0.263773	3.71255e-09	3.91917e-08	ADAM9	protein_coding	ADAM metallopeptidase domain 9 [Source:HGNC Symbol;Acc:HGNC:216]
ENSG00000178104	4563.29	4699.05	4658.49	4014.98	4123.7	4033.74	4640.27	4057.47	0.194182	3.7596e-09	3.96631e-08	PDE4DIP	protein_coding	phosphodiesterase 4D interacting protein [Source:HGNC Symbol;Acc:HGNC:15580]
ENSG00000135414	1177.49	1195.1	1203.07	918.395	915.549	952.269	1191.89	928.737	0.360169	3.76292e-09	3.96727e-08	GDF11	protein_coding	growth differentiation factor 11 [Source:HGNC Symbol;Acc:HGNC:4216]
ENSG00000169230	1862.61	1917.41	1841.48	1586.08	1514.55	1434.59	1873.83	1511.74	0.309155	3.76782e-09	3.96991e-08	PRELID1	protein_coding	PRELI domain containing 1 [Source:HGNC Symbol;Acc:HGNC:30255]
ENSG00000119408	346.751	316.404	353.969	530.766	478.558	511.174	339.041	506.833	-0.583194	3.8204e-09	4.02274e-08	NEK6	protein_coding	NIMA related kinase 6 [Source:HGNC Symbol;Acc:HGNC:7749]
ENSG00000136840	665.218	628.287	637.355	480.09	409.279	452.431	643.62	447.267	0.522174	3.82748e-09	4.02763e-08	ST6GALNAC4	protein_coding	ST6 N-acetylgalactosaminide alpha-2,6-sialyltransferase 4 [Source:HGNC Symbol;Acc:HGNC:17846]
ENSG00000173402	8144.99	8098.12	8058.07	8858.55	9189.6	8965.13	8100.39	9004.43	-0.152303	3.91589e-09	4.11804e-08	DAG1	protein_coding	dystroglycan 1 [Source:HGNC Symbol;Acc:HGNC:2666]
ENSG00000164715	2207.27	2301.61	2157.53	1838.57	1886.52	1681.93	2222.13	1802.34	0.302524	3.92774e-09	4.12787e-08	LMTK2	protein_coding	lemur tyrosine kinase 2 [Source:HGNC Symbol;Acc:HGNC:17880]
ENSG00000168502	1374.43	1337.03	1314.74	1028.64	1077.56	1069.76	1342.07	1058.65	0.343011	4.03577e-09	4.23872e-08	MTCL1	protein_coding	microtubule crosslinking factor 1 [Source:HGNC Symbol;Acc:HGNC:29121]
ENSG00000198840	8393.27	7926.36	8790.23	7238.69	6810.66	7476.96	8369.96	7175.44	0.221506	4.0726e-09	4.2731e-08	MT-ND3	protein_coding	mitochondrially encoded NADH:ubiquinone oxidoreductase core subunit 3 [Source:HGNC Symbol;Acc:HGNC:7458]
ENSG00000196205	2137.08	2087.36	2518.87	4142.11	3340.31	3711.17	2247.77	3731.2	-0.731579	4.07368e-09	4.2731e-08	EEF1A1P5	processed_pseudogene	eukaryotic translation elongation factor 1 alpha 1 pseudogene 5 [Source:HGNC Symbol;Acc:HGNC:3200]
ENSG00000133028	1742.14	1755.59	1785.65	1326.47	1480.44	1433.56	1761.12	1413.49	0.318805	4.08382e-09	4.28102e-08	SCO1	protein_coding	SCO1, cytochrome c oxidase assembly protein [Source:HGNC Symbol;Acc:HGNC:10603]
ENSG00000198176	2529.92	2477.89	2459.88	2112.4	2101.82	2052.94	2489.23	2089.05	0.252523	4.12952e-09	4.32618e-08	TFDP1	protein_coding	transcription factor Dp-1 [Source:HGNC Symbol;Acc:HGNC:11749]
ENSG00000139985	40.8559	34.3524	37.9253	2.66717	1.06583	6.18356	37.7112	3.30552	3.51321	4.1395e-09	4.33389e-08	ADAM21	protein_coding	ADAM metallopeptidase domain 21 [Source:HGNC Symbol;Acc:HGNC:200]
ENSG00000183856	1046.54	1015.2	981.843	1314.02	1333.35	1247.02	1014.53	1298.13	-0.355703	4.16546e-09	4.3583e-08	IQGAP3	protein_coding	IQ motif containing GTPase activating protein 3 [Source:HGNC Symbol;Acc:HGNC:20669]
ENSG00000104472	499.699	542.406	548.863	327.173	376.238	366.891	530.323	356.767	0.574878	4.26734e-09	4.46207e-08	CHRAC1	protein_coding	chromatin accessibility complex subunit 1 [Source:HGNC Symbol;Acc:HGNC:13544]
ENSG00000115457	3966.17	3664.86	3948.44	3361.52	3276.36	3175.26	3859.82	3271.05	0.237495	4.29185e-09	4.48486e-08	IGFBP2	protein_coding	insulin like growth factor binding protein 2 [Source:HGNC Symbol;Acc:HGNC:5471]
ENSG00000175906	259.802	255.835	232.819	392.074	397.555	385.442	249.485	391.69	-0.649876	4.34481e-09	4.53733e-08	ARL4D	protein_coding	ADP ribosylation factor like GTPase 4D [Source:HGNC Symbol;Acc:HGNC:656]
ENSG00000173542	549.983	533.366	520.419	756.587	738.621	714.201	534.589	736.47	-0.462826	4.39784e-09	4.58981e-08	MOB1B	protein_coding	MOB kinase activator 1B [Source:HGNC Symbol;Acc:HGNC:29801]
ENSG00000158402	235.707	247.699	262.316	416.078	379.436	380.289	248.574	391.934	-0.658568	4.43914e-09	4.62999e-08	CDC25C	protein_coding	cell division cycle 25C [Source:HGNC Symbol;Acc:HGNC:1727]
ENSG00000132300	2525.73	2637.9	2553.63	2175.52	2187.09	2120.96	2572.42	2161.19	0.251755	4.5288e-09	4.72053e-08	PTCD3	protein_coding	pentatricopeptide repeat domain 3 [Source:HGNC Symbol;Acc:HGNC:24717]
ENSG00000136381	2199.93	2376.64	2285	1879.46	1836.43	1942.67	2287.19	1886.19	0.2788	4.78069e-09	4.97994e-08	IREB2	protein_coding	iron responsive element binding protein 2 [Source:HGNC Symbol;Acc:HGNC:6115]
ENSG00000198356	2788.68	2693.05	2801.2	2380	2327.78	2270.4	2760.98	2326.06	0.24625	4.80611e-09	5.00327e-08	ASNA1	protein_coding	arsA arsenite transporter, ATP-binding, homolog 1 (bacterial) [Source:HGNC Symbol;Acc:HGNC:752]
ENSG00000214456	313.229	267.587	268.637	414.3	491.348	432.849	283.151	446.166	-0.655596	4.8149e-09	5.00926e-08	PLIN5	protein_coding	perilipin 5 [Source:HGNC Symbol;Acc:HGNC:33196]
ENSG00000121864	1236.15	1196.91	1171.47	947.734	945.392	915.167	1201.51	936.098	0.359789	4.82118e-09	5.01264e-08	ZNF639	protein_coding	zinc finger protein 639 [Source:HGNC Symbol;Acc:HGNC:30950]
ENSG00000026559	985.78	924.802	979.736	741.473	725.831	714.201	963.439	727.168	0.404463	4.84446e-09	5.03367e-08	KCNG1	protein_coding	potassium voltage-gated channel modifier subfamily G member 1 [Source:HGNC Symbol;Acc:HGNC:6248]
ENSG00000185803	1680.33	1600.1	1725.6	1407.38	1279	1272.78	1668.68	1319.72	0.33612	4.86783e-09	5.05478e-08	SLC52A2	protein_coding	solute carrier family 52 member 2 [Source:HGNC Symbol;Acc:HGNC:30224]
ENSG00000082701	2778.2	2722.88	2746.42	2260.87	2293.67	2399.22	2749.17	2317.92	0.246477	4.8744e-09	5.05842e-08	GSK3B	protein_coding	glycogen synthase kinase 3 beta [Source:HGNC Symbol;Acc:HGNC:4617]
ENSG00000132676	2684.97	2607.17	2634.75	2274.21	2126.33	2240.51	2642.29	2213.68	0.254255	4.91332e-09	5.09561e-08	DAP3	protein_coding	death associated protein 3 [Source:HGNC Symbol;Acc:HGNC:2673]
ENSG00000215021	5517.64	5704.3	5572.91	4830.24	4979.56	4997.35	5598.28	4935.72	0.182533	5.02119e-09	5.20421e-08	PHB2	protein_coding	prohibitin 2 [Source:HGNC Symbol;Acc:HGNC:30306]
ENSG00000188153	4180.92	4306.7	4135.96	4747.56	4902.82	4796.38	4207.86	4815.59	-0.193785	5.03427e-09	5.21449e-08	COL4A5	protein_coding	collagen type IV alpha 5 chain [Source:HGNC Symbol;Acc:HGNC:2207]
ENSG00000123739	520.651	490.878	473.012	686.351	694.922	687.406	494.847	689.56	-0.478725	5.0717e-09	5.24997e-08	PLA2G12A	protein_coding	phospholipase A2 group XIIA [Source:HGNC Symbol;Acc:HGNC:18554]
ENSG00000112081	4606.24	4726.17	4833.37	5335.23	5415.49	5349.81	4721.92	5366.84	-0.184552	5.11947e-09	5.2961e-08	SRSF3	protein_coding	serine and arginine rich splicing factor 3 [Source:HGNC Symbol;Acc:HGNC:10785]
ENSG00000110723	461.986	424.885	419.285	564.551	675.737	686.375	435.385	642.221	-0.558985	5.13205e-09	5.30579e-08	EXPH5	protein_coding	exophilin 5 [Source:HGNC Symbol;Acc:HGNC:30578]
ENSG00000160131	1416.34	1391.27	1343.19	1042.86	1129.78	1100.67	1383.6	1091.11	0.34407	5.21114e-09	5.38419e-08	VMA21	protein_coding	VMA21, vacuolar ATPase assembly factor [Source:HGNC Symbol;Acc:HGNC:22082]
ENSG00000145715	1522.14	1541.34	1487.51	1851.9	1847.09	1853.01	1517	1850.67	-0.286416	5.28242e-09	5.45443e-08	RASA1	protein_coding	RAS p21 protein activator 1 [Source:HGNC Symbol;Acc:HGNC:9871]
ENSG00000198417	2139.17	2094.59	2266.03	2744.52	2569.72	2540.41	2166.6	2618.22	-0.274738	5.31119e-09	5.48071e-08	MT1F	protein_coding	metallothionein 1F [Source:HGNC Symbol;Acc:HGNC:7398]
ENSG00000182898	70.1883	89.497	94.8132	188.48	197.179	153.558	84.8328	179.739	-1.08216	5.33794e-09	5.50487e-08	TCHHL1	protein_coding	trichohyalin like 1 [Source:HGNC Symbol;Acc:HGNC:31796]
ENSG00000164855	1357.67	1323.47	1259.96	1685.65	1661.63	1575.78	1313.7	1641.02	-0.321228	5.36862e-09	5.53306e-08	TMEM184A	protein_coding	transmembrane protein 184A [Source:HGNC Symbol;Acc:HGNC:28797]
ENSG00000135018	1712.81	1738.41	1724.55	2047.5	2065.58	2148.79	1725.25	2087.29	-0.274273	5.54414e-09	5.71039e-08	UBQLN1	protein_coding	ubiquilin 1 [Source:HGNC Symbol;Acc:HGNC:12508]
ENSG00000138756	514.365	578.567	518.312	352.955	359.185	381.32	537.081	364.487	0.561672	5.55517e-09	5.71819e-08	BMP2K	protein_coding	BMP2 inducible kinase [Source:HGNC Symbol;Acc:HGNC:18041]
ENSG00000162413	1168.06	1023.34	1098.78	1380.7	1370.66	1502.61	1096.73	1417.99	-0.371738	5.61175e-09	5.77284e-08	KLHL21	protein_coding	kelch like family member 21 [Source:HGNC Symbol;Acc:HGNC:29041]
ENSG00000003989	676.741	696.088	653.157	431.192	524.389	459.645	675.329	471.742	0.520935	5.67091e-09	5.83006e-08	SLC7A2	protein_coding	solute carrier family 7 member 2 [Source:HGNC Symbol;Acc:HGNC:11060]
ENSG00000187720	455.7	476.413	477.226	334.285	300.564	299.903	469.78	311.584	0.590366	5.68913e-09	5.84516e-08	THSD4	protein_coding	thrombospondin type 1 domain containing 4 [Source:HGNC Symbol;Acc:HGNC:25835]
ENSG00000119397	102.664	80.4569	110.615	215.152	191.85	182.415	97.9119	196.472	-1.01207	5.71518e-09	5.86827e-08	CNTRL	protein_coding	centriolin [Source:HGNC Symbol;Acc:HGNC:1858]
ENSG00000149806	5522.88	5785.67	5740.41	5121.85	4927.34	4906.66	5682.99	4985.28	0.18872	5.85033e-09	6.00331e-08	FAU	protein_coding	FAU, ubiquitin like and ribosomal protein S30 fusion [Source:HGNC Symbol;Acc:HGNC:3597]
ENSG00000147649	3133.33	3380.09	3395.37	2801.42	2799.94	2798.06	3302.93	2799.81	0.238806	5.86171e-09	6.01126e-08	MTDH	protein_coding	metadherin [Source:HGNC Symbol;Acc:HGNC:29608]
ENSG00000185813	1951.66	1834.24	1826.73	1501.62	1564.64	1499.51	1870.88	1521.92	0.297904	5.92727e-09	6.07471e-08	PCYT2	protein_coding	phosphate cytidylyltransferase 2, ethanolamine [Source:HGNC Symbol;Acc:HGNC:8756]
ENSG00000070540	401.226	383.3	416.124	592.111	567.022	564.765	400.217	574.633	-0.523842	5.94351e-09	6.08759e-08	WIPI1	protein_coding	WD repeat domain, phosphoinositide interacting 1 [Source:HGNC Symbol;Acc:HGNC:25471]
ENSG00000125629	457.796	425.789	435.087	614.338	618.182	630.723	439.557	621.081	-0.499389	5.98992e-09	6.13132e-08	INSIG2	protein_coding	insulin induced gene 2 [Source:HGNC Symbol;Acc:HGNC:20452]
ENSG00000103423	4389.39	4522.76	4683.77	3883.4	4028.84	3854.42	4531.98	3922.22	0.208719	6.05342e-09	6.19248e-08	DNAJA3	protein_coding	DnaJ heat shock protein family (Hsp40) member A3 [Source:HGNC Symbol;Acc:HGNC:11808]
ENSG00000257103	3254.85	3235.45	3251.04	2660.94	2905.46	2664.08	3247.11	2743.5	0.243941	6.09733e-09	6.23354e-08	LSM14A	protein_coding	LSM14A, mRNA processing body assembly factor [Source:HGNC Symbol;Acc:HGNC:24489]
ENSG00000158246	1065.4	993.507	987.111	1329.14	1260.88	1297.52	1015.34	1295.84	-0.353118	6.1399e-09	6.27318e-08	TENT5B	protein_coding	terminal nucleotidyltransferase 5B [Source:HGNC Symbol;Acc:HGNC:28273]
ENSG00000115286	499.699	466.469	467.745	299.612	330.408	327.729	477.971	319.249	0.5837	6.18525e-09	6.31435e-08	NDUFS7	protein_coding	NADH:ubiquinone oxidoreductase core subunit S7 [Source:HGNC Symbol;Acc:HGNC:7714]
ENSG00000119711	783.595	726.824	805.912	991.298	1086.08	1001.74	772.111	1026.37	-0.411191	6.18784e-09	6.31435e-08	ALDH6A1	protein_coding	aldehyde dehydrogenase 6 family member A1 [Source:HGNC Symbol;Acc:HGNC:7179]
ENSG00000223564	487.128	452.909	486.708	644.566	684.264	669.886	475.582	666.238	-0.486833	6.22291e-09	6.34622e-08	CYP4F32P	unprocessed_pseudogene	cytochrome P450 family 4 subfamily F member 32, pseudogene [Source:HGNC Symbol;Acc:HGNC:39951]
ENSG00000103404	1272.82	1252.96	1273.66	982.407	1023.2	988.339	1266.48	997.981	0.34406	6.27938e-09	6.39986e-08	USP31	protein_coding	ubiquitin specific peptidase 31 [Source:HGNC Symbol;Acc:HGNC:20060]
ENSG00000132768	1224.63	1135.44	1176.74	923.729	933.668	879.096	1178.93	912.165	0.369151	6.29029e-09	6.40702e-08	DPH2	protein_coding	DPH2 homolog [Source:HGNC Symbol;Acc:HGNC:3004]
ENSG00000164305	1227.77	1192.39	1258.91	1492.73	1545.46	1550.01	1226.36	1529.4	-0.31874	6.32891e-09	6.44238e-08	CASP3	protein_coding	caspase 3 [Source:HGNC Symbol;Acc:HGNC:1504]
ENSG00000072310	4493.1	4148.5	3798.85	3530.44	3262.51	3407.14	4146.82	3400.03	0.285944	6.35983e-09	6.46988e-08	SREBF1	protein_coding	sterol regulatory element binding transcription factor 1 [Source:HGNC Symbol;Acc:HGNC:11289]
ENSG00000182934	4375.77	4276.87	4536.28	3803.38	3773.04	3869.88	4396.31	3815.43	0.203938	6.37551e-09	6.48183e-08	SRPRA	protein_coding	SRP receptor subunit alpha [Source:HGNC Symbol;Acc:HGNC:11307]
ENSG00000132313	1157.58	1122.78	1095.62	876.609	864.389	877.035	1125.33	872.678	0.366617	6.39737e-09	6.50006e-08	MRPL35	protein_coding	mitochondrial ribosomal protein L35 [Source:HGNC Symbol;Acc:HGNC:14489]
ENSG00000105939	1831.18	1825.2	1775.11	1356.7	1503.89	1508.79	1810.5	1456.46	0.315746	6.41753e-09	6.51654e-08	ZC3HAV1	protein_coding	zinc finger CCCH-type containing, antiviral 1 [Source:HGNC Symbol;Acc:HGNC:23721]
ENSG00000197321	1475	1408.45	1402.18	1714.1	1815.11	1755.1	1428.54	1761.44	-0.301818	6.60275e-09	6.70049e-08	SVIL	protein_coding	supervillin [Source:HGNC Symbol;Acc:HGNC:11480]
ENSG00000141429	793.024	834.401	849.105	577.886	576.615	653.396	825.51	602.632	0.454972	6.64554e-09	6.73978e-08	GALNT1	protein_coding	polypeptide N-acetylgalactosaminyltransferase 1 [Source:HGNC Symbol;Acc:HGNC:4123]
ENSG00000182512	1619.57	1511.51	1557.04	1321.14	1174.55	1183.12	1562.71	1226.27	0.347338	6.71415e-09	6.80518e-08	GLRX5	protein_coding	glutaredoxin 5 [Source:HGNC Symbol;Acc:HGNC:20134]
ENSG00000172478	670.456	627.383	656.318	897.058	870.784	847.148	651.386	871.663	-0.421907	6.73631e-09	6.82345e-08	MAB21L4	protein_coding	mab-21 like 4 [Source:HGNC Symbol;Acc:HGNC:26216]
ENSG00000108518	10991.3	10980.1	11126.9	10034.8	10177.6	9748.39	11032.7	9986.93	0.143602	6.83451e-09	6.91869e-08	PFN1	protein_coding	profilin 1 [Source:HGNC Symbol;Acc:HGNC:8881]
ENSG00000116161	2292.12	2244.66	2466.2	1939.92	1935.55	1900.41	2334.32	1925.29	0.277031	6.96881e-09	7.05032e-08	CACYBP	protein_coding	calcyclin binding protein [Source:HGNC Symbol;Acc:HGNC:30423]
ENSG00000019144	828.642	780.161	802.752	1105.1	1002.95	1054.3	803.851	1054.11	-0.393013	7.09624e-09	7.17484e-08	PHLDB1	protein_coding	pleckstrin homology like domain family B member 1 [Source:HGNC Symbol;Acc:HGNC:23697]
ENSG00000213995	907.211	771.121	859.639	1186.89	1108.46	1082.12	845.99	1125.83	-0.415189	7.13291e-09	7.20751e-08	NAXD	protein_coding	NAD(P)HX dehydratase [Source:HGNC Symbol;Acc:HGNC:25576]
ENSG00000104856	850.641	854.29	833.302	667.681	606.458	601.867	846.078	625.335	0.434431	7.46405e-09	7.5375e-08	RELB	protein_coding	RELB proto-oncogene, NF-kB subunit [Source:HGNC Symbol;Acc:HGNC:9956]
ENSG00000015171	1654.14	1658.86	1683.46	2062.61	2058.12	1943.7	1665.49	2021.48	-0.279909	7.63019e-09	7.70057e-08	ZMYND11	protein_coding	zinc finger MYND-type containing 11 [Source:HGNC Symbol;Acc:HGNC:16966]
ENSG00000047644	732.264	645.463	673.174	881.944	912.351	982.156	683.633	925.484	-0.437465	7.6657e-09	7.73169e-08	WWC3	protein_coding	WWC family member 3 [Source:HGNC Symbol;Acc:HGNC:29237]
ENSG00000221869	3294.66	3050.13	2987.67	3821.16	3660.06	3578.22	3110.82	3686.48	-0.245812	7.77505e-09	7.8372e-08	CEBPD	protein_coding	CCAAT enhancer binding protein delta [Source:HGNC Symbol;Acc:HGNC:1835]
ENSG00000143033	442.082	444.773	511.991	677.461	638.433	668.855	466.282	661.583	-0.50665	7.83096e-09	7.88873e-08	MTF2	protein_coding	metal response element binding transcription factor 2 [Source:HGNC Symbol;Acc:HGNC:29535]
ENSG00000106348	5452.69	5044.38	5233.69	4668.43	4521.26	4439.8	5243.59	4543.16	0.205827	7.85075e-09	7.90386e-08	IMPDH1	protein_coding	inosine monophosphate dehydrogenase 1 [Source:HGNC Symbol;Acc:HGNC:6052]
ENSG00000068796	799.309	841.634	826.982	579.665	622.445	626.601	822.641	609.57	0.434417	7.95444e-09	8.00337e-08	KIF2A	protein_coding	kinesin family member 2A [Source:HGNC Symbol;Acc:HGNC:6318]
ENSG00000182220	2821.15	2853.06	2908.66	2480.47	2373.61	2433.23	2860.96	2429.1	0.235386	8.18766e-09	8.23301e-08	ATP6AP2	protein_coding	ATPase H+ transporting accessory protein 2 [Source:HGNC Symbol;Acc:HGNC:18305]
ENSG00000198860	318.467	274.819	284.44	450.751	434.859	447.278	292.575	444.296	-0.604814	8.43785e-09	8.47943e-08	TSEN15	protein_coding	tRNA splicing endonuclease subunit 15 [Source:HGNC Symbol;Acc:HGNC:16791]
ENSG00000146281	1101.01	1026.96	1102.99	1386.93	1364.26	1331.53	1076.99	1360.91	-0.339149	8.72754e-09	8.76521e-08	PM20D2	protein_coding	peptidase M20 domain containing 2 [Source:HGNC Symbol;Acc:HGNC:21408]
ENSG00000007080	1603.86	1548.57	1590.75	1311.36	1286.46	1196.52	1581.06	1264.78	0.320802	8.75291e-09	8.78534e-08	CCDC124	protein_coding	coiled-coil domain containing 124 [Source:HGNC Symbol;Acc:HGNC:25171]
ENSG00000263528	853.784	794.625	824.875	1105.1	1090.35	1027.5	824.428	1074.31	-0.383406	8.76708e-09	8.79422e-08	IKBKE	protein_coding	inhibitor of nuclear factor kappa B kinase subunit epsilon [Source:HGNC Symbol;Acc:HGNC:14552]
ENSG00000123815	498.652	509.862	436.141	698.798	703.449	647.213	481.551	683.153	-0.503267	8.85834e-09	8.88038e-08	COQ8B	protein_coding	coenzyme Q8B [Source:HGNC Symbol;Acc:HGNC:19041]
ENSG00000145860	2425.16	2571.91	2552.58	2161.3	2085.83	2072.52	2516.55	2106.55	0.256357	8.9418e-09	8.95861e-08	RNF145	protein_coding	ring finger protein 145 [Source:HGNC Symbol;Acc:HGNC:20853]
ENSG00000178927	1592.33	1516.03	1570.74	1935.48	1911.04	1851.98	1559.7	1899.5	-0.285416	9.03765e-09	9.04916e-08	CYBC1	protein_coding	cytochrome b-245 chaperone 1 [Source:HGNC Symbol;Acc:HGNC:28672]
ENSG00000099822	165.519	134.698	151.701	67.5683	76.7398	62.8662	150.639	69.0581	1.12466	9.10355e-09	9.10962e-08	HCN2	protein_coding	hyperpolarization activated cyclic nucleotide gated potassium and sodium channel 2 [Source:HGNC Symbol;Acc:HGNC:4846]
ENSG00000140450	230.469	261.259	245.461	144.027	116.176	146.344	245.73	135.516	0.857065	9.12211e-09	9.12266e-08	ARRDC4	protein_coding	arrestin domain containing 4 [Source:HGNC Symbol;Acc:HGNC:28087]
ENSG00000170191	189.613	175.378	188.573	295.167	294.169	331.851	184.521	307.062	-0.735628	9.44115e-09	9.43601e-08	NANP	protein_coding	N-acetylneuraminic acid phosphatase [Source:HGNC Symbol;Acc:HGNC:16140]
ENSG00000105993	1412.15	1408.45	1348.45	1714.1	1739.44	1672.65	1389.68	1708.73	-0.297776	9.52012e-09	9.50919e-08	DNAJB6	protein_coding	DnaJ heat shock protein family (Hsp40) member B6 [Source:HGNC Symbol;Acc:HGNC:14888]
ENSG00000116857	2495.35	2453.48	2458.82	2078.61	2141.25	1944.73	2469.22	2054.87	0.264858	9.54744e-09	9.53071e-08	TMEM9	protein_coding	transmembrane protein 9 [Source:HGNC Symbol;Acc:HGNC:18823]
ENSG00000065320	1373.39	1353.3	1331.6	1108.65	1049.84	1063.57	1352.76	1074.02	0.331936	9.90285e-09	9.87953e-08	NTN1	protein_coding	netrin 1 [Source:HGNC Symbol;Acc:HGNC:8029]
ENSG00000138604	742.739	812.705	780.628	536.101	552.101	609.081	778.691	565.761	0.462906	1.00101e-08	9.9805e-08	GLCE	protein_coding	glucuronic acid epimerase [Source:HGNC Symbol;Acc:HGNC:17855]
ENSG00000160007	4162.06	4103.3	4206.54	4688.88	4745.08	4734.55	4157.3	4722.84	-0.184137	1.00272e-08	9.99151e-08	ARHGAP35	protein_coding	Rho GTPase activating protein 35 [Source:HGNC Symbol;Acc:HGNC:4591]
ENSG00000163191	7711.29	7315.25	7845.26	8858.55	8497.87	8477.66	7623.93	8611.36	-0.176632	1.01173e-08	1.00752e-07	S100A11	protein_coding	S100 calcium binding protein A11 [Source:HGNC Symbol;Acc:HGNC:10488]
ENSG00000105127	1337.77	1271.94	1253.64	1045.53	1004.01	986.278	1287.78	1011.94	0.346645	1.02352e-08	1.01865e-07	AKAP8	protein_coding	A-kinase anchoring protein 8 [Source:HGNC Symbol;Acc:HGNC:378]
ENSG00000265808	1070.63	1051.36	1086.14	1330.03	1374.92	1327.4	1069.38	1344.12	-0.32999	1.03855e-08	1.03245e-07	SEC22B	protein_coding	SEC22 homolog B, vesicle trafficking protein (gene/pseudogene) [Source:HGNC Symbol;Acc:HGNC:10700]
ENSG00000182379	270.278	237.755	244.407	132.469	141.756	151.497	250.813	141.907	0.822596	1.03863e-08	1.03245e-07	NXPH4	protein_coding	neurexophilin 4 [Source:HGNC Symbol;Acc:HGNC:8078]
ENSG00000070770	1150.25	1071.25	1143.03	1376.26	1415.42	1441.8	1121.51	1411.16	-0.332037	1.05596e-08	1.04904e-07	CSNK2A2	protein_coding	casein kinase 2 alpha 2 [Source:HGNC Symbol;Acc:HGNC:2459]
ENSG00000166266	1041.3	1036	1016.61	1337.14	1268.34	1299.58	1031.3	1301.69	-0.336524	1.06417e-08	1.05656e-07	CUL5	protein_coding	cullin 5 [Source:HGNC Symbol;Acc:HGNC:2556]
ENSG00000184007	2699.63	2607.17	2696.91	2292.88	2259.56	2218.87	2667.9	2257.1	0.240374	1.07106e-08	1.06277e-07	PTP4A2	protein_coding	protein tyrosine phosphatase type IVA, member 2 [Source:HGNC Symbol;Acc:HGNC:9635]
ENSG00000166912	256.659	278.435	264.423	413.411	443.386	382.35	266.506	413.049	-0.630542	1.07178e-08	1.06284e-07	MTMR10	protein_coding	myotubularin related protein 10 [Source:HGNC Symbol;Acc:HGNC:25999]
ENSG00000100243	2428.31	2369.41	2296.59	1964.81	1997.37	1983.89	2364.77	1982.02	0.25504	1.07989e-08	1.07023e-07	CYB5R3	protein_coding	cytochrome b5 reductase 3 [Source:HGNC Symbol;Acc:HGNC:2873]
ENSG00000144118	1357.67	1266.52	1382.17	1827.01	1595.55	1657.19	1335.45	1693.25	-0.344982	1.09746e-08	1.087e-07	RALB	protein_coding	RAS like proto-oncogene B [Source:HGNC Symbol;Acc:HGNC:9840]
ENSG00000149554	1300.06	1365.06	1257.85	1041.97	1060.5	951.238	1307.66	1017.9	0.361936	1.10813e-08	1.09691e-07	CHEK1	protein_coding	checkpoint kinase 1 [Source:HGNC Symbol;Acc:HGNC:1925]
ENSG00000263465	1015.11	935.651	951.292	1227.79	1282.19	1204.76	967.352	1238.25	-0.356636	1.11181e-08	1.09989e-07	SRSF8	protein_coding	serine and arginine rich splicing factor 8 [Source:HGNC Symbol;Acc:HGNC:16988]
ENSG00000049618	1465.57	1420.2	1466.44	1742.55	1807.65	1766.44	1450.74	1772.21	-0.288835	1.11841e-08	1.10576e-07	ARID1B	protein_coding	AT-rich interaction domain 1B [Source:HGNC Symbol;Acc:HGNC:18040]
ENSG00000099814	2427.26	2367.6	2160.69	2780.97	2779.69	2786.73	2318.52	2782.46	-0.262693	1.12366e-08	1.11029e-07	CEP170B	protein_coding	centrosomal protein 170B [Source:HGNC Symbol;Acc:HGNC:20362]
ENSG00000261716	218.946	210.634	195.947	310.281	374.107	341.126	208.509	341.838	-0.710568	1.12644e-08	1.11236e-07	HIST2H2BC	transcribed_unprocessed_pseudogene	histone cluster 2 H2B family member c (pseudogene) [Source:NCBI gene;Acc:337873]
ENSG00000105953	4137.97	4136.75	4123.32	3626.46	3669.66	3521.54	4132.68	3605.88	0.196712	1.15055e-08	1.13513e-07	OGDH	protein_coding	oxoglutarate dehydrogenase [Source:HGNC Symbol;Acc:HGNC:8124]
ENSG00000100441	624.362	602.071	629.981	804.596	823.887	863.637	618.805	830.707	-0.424953	1.15086e-08	1.13513e-07	KHNYN	protein_coding	KH and NYN domain containing [Source:HGNC Symbol;Acc:HGNC:20166]
ENSG00000166750	887.306	909.434	894.404	1146.88	1146.83	1142.93	897.048	1145.55	-0.352421	1.15631e-08	1.13982e-07	SLFN5	protein_coding	schlafen family member 5 [Source:HGNC Symbol;Acc:HGNC:28286]
ENSG00000151348	1103.11	1218.61	1235.73	1521.17	1478.31	1485.09	1185.82	1494.86	-0.33392	1.17633e-08	1.15884e-07	EXT2	protein_coding	exostosin glycosyltransferase 2 [Source:HGNC Symbol;Acc:HGNC:3513]
ENSG00000278540	2890.29	2956.11	2898.12	2427.12	2423.7	2573.39	2914.84	2474.74	0.236745	1.17701e-08	1.15884e-07	ACACA	protein_coding	acetyl-CoA carboxylase alpha [Source:HGNC Symbol;Acc:HGNC:84]
ENSG00000104738	4859.76	5010.02	5075.67	4357.26	4363.51	4430.52	4981.82	4383.77	0.184696	1.17867e-08	1.15978e-07	MCM4	protein_coding	minichromosome maintenance complex component 4 [Source:HGNC Symbol;Acc:HGNC:6947]
ENSG00000064726	1233.01	1222.22	1310.53	999.299	995.486	962.574	1255.25	985.787	0.347735	1.2336e-08	1.21312e-07	BTBD1	protein_coding	BTB domain containing 1 [Source:HGNC Symbol;Acc:HGNC:1120]
ENSG00000008517	231.517	205.21	248.621	123.579	91.6615	138.1	228.449	117.78	0.951304	1.24091e-08	1.21957e-07	IL32	protein_coding	interleukin 32 [Source:HGNC Symbol;Acc:HGNC:16830]
ENSG00000107731	681.979	602.071	647.89	926.396	840.941	848.179	643.98	871.839	-0.440001	1.26229e-08	1.23985e-07	UNC5B	protein_coding	unc-5 netrin receptor B [Source:HGNC Symbol;Acc:HGNC:12568]
ENSG00000168476	609.696	614.727	599.43	787.704	833.48	826.536	607.951	815.907	-0.423231	1.27783e-08	1.25437e-07	REEP4	protein_coding	receptor accessory protein 4 [Source:HGNC Symbol;Acc:HGNC:26176]
ENSG00000147650	45.0463	37.9684	49.5135	102.241	106.583	124.702	44.1761	111.175	-1.33517	1.3093e-08	1.2845e-07	LRP12	protein_coding	LDL receptor related protein 12 [Source:HGNC Symbol;Acc:HGNC:31708]
ENSG00000049541	1357.67	1299.06	1322.12	1037.53	1073.29	1053.27	1326.28	1054.7	0.330636	1.3103e-08	1.28472e-07	RFC2	protein_coding	replication factor C subunit 2 [Source:HGNC Symbol;Acc:HGNC:9970]
ENSG00000136854	729.121	688.856	725.848	522.765	525.455	518.389	714.608	522.203	0.451715	1.33801e-08	1.3111e-07	STXBP1	protein_coding	syntaxin binding protein 1 [Source:HGNC Symbol;Acc:HGNC:11444]
ENSG00000186187	878.926	808.185	862.8	1097.1	1093.54	1098.61	849.97	1096.42	-0.368639	1.34798e-08	1.32009e-07	ZNRF1	protein_coding	zinc and ring finger 1 [Source:HGNC Symbol;Acc:HGNC:18452]
ENSG00000175115	1563	1373.19	1406.4	1746.11	1814.04	1877.74	1447.53	1812.63	-0.324878	1.35364e-08	1.32485e-07	PACS1	protein_coding	phosphofurin acidic cluster sorting protein 1 [Source:HGNC Symbol;Acc:HGNC:30032]
ENSG00000112146	1481.29	1550.38	1546.51	1863.46	1868.4	1831.36	1526.06	1854.41	-0.28083	1.43891e-08	1.40747e-07	FBXO9	protein_coding	F-box protein 9 [Source:HGNC Symbol;Acc:HGNC:13588]
ENSG00000144645	621.219	649.983	619.446	837.491	830.282	852.301	630.216	840.025	-0.413693	1.43986e-08	1.40757e-07	OSBPL10	protein_coding	oxysterol binding protein like 10 [Source:HGNC Symbol;Acc:HGNC:16395]
ENSG00000254858	815.023	776.545	841.73	609.892	603.26	595.683	811.099	602.945	0.426559	1.46327e-08	1.42961e-07	MPV17L2	protein_coding	MPV17 mitochondrial inner membrane protein like 2 [Source:HGNC Symbol;Acc:HGNC:28177]
ENSG00000274211	580.363	557.774	559.398	735.249	776.991	789.435	565.845	767.225	-0.438627	1.4788e-08	1.44393e-07	SOCS7	protein_coding	suppressor of cytokine signaling 7 [Source:HGNC Symbol;Acc:HGNC:29846]
ENSG00000110090	2913.34	2922.67	2784.35	2291.99	2496.18	2461.06	2873.45	2416.41	0.251417	1.48686e-08	1.45094e-07	CPT1A	protein_coding	carnitine palmitoyltransferase 1A [Source:HGNC Symbol;Acc:HGNC:2328]
ENSG00000102580	756.358	819.033	804.859	1014.41	1028.53	1055.33	793.417	1032.76	-0.379151	1.51879e-08	1.48122e-07	DNAJC3	protein_coding	DnaJ heat shock protein family (Hsp40) member C3 [Source:HGNC Symbol;Acc:HGNC:9439]
ENSG00000204713	1792.42	1722.14	1763.53	2109.73	2122.07	2094.17	1759.36	2108.66	-0.261783	1.52495e-08	1.48635e-07	TRIM27	protein_coding	tripartite motif containing 27 [Source:HGNC Symbol;Acc:HGNC:9975]
ENSG00000101057	6505.52	6182.53	6528.41	5521.93	5710.72	5734.22	6405.49	5655.62	0.179512	1.5345e-08	1.49478e-07	MYBL2	protein_coding	MYB proto-oncogene like 2 [Source:HGNC Symbol;Acc:HGNC:7548]
ENSG00000076513	3335.52	3381.9	3270	3778.49	3849.78	3858.54	3329.14	3828.94	-0.201126	1.54374e-08	1.50289e-07	ANKRD13A	protein_coding	ankyrin repeat domain 13A [Source:HGNC Symbol;Acc:HGNC:21268]
ENSG00000152256	209.517	215.154	240.193	336.952	348.527	376.167	221.622	353.882	-0.675172	1.54695e-08	1.50513e-07	PDK1	protein_coding	pyruvate dehydrogenase kinase 1 [Source:HGNC Symbol;Acc:HGNC:8809]
ENSG00000160326	1097.87	1091.14	1070.34	841.047	838.809	860.546	1086.45	846.801	0.359765	1.54881e-08	1.50606e-07	SLC2A6	protein_coding	solute carrier family 2 member 6 [Source:HGNC Symbol;Acc:HGNC:11011]
ENSG00000213516	411.702	404.997	407.697	555.66	591.536	588.469	408.132	578.555	-0.502623	1.55355e-08	1.50978e-07	RBMXL1	protein_coding	RBMX like 1 [Source:HGNC Symbol;Acc:HGNC:25073]
ENSG00000119922	1117.78	1141.76	1108.26	1418.04	1396.24	1383.06	1122.6	1399.11	-0.317522	1.58571e-08	1.54012e-07	IFIT2	protein_coding	interferon induced protein with tetratricopeptide repeats 2 [Source:HGNC Symbol;Acc:HGNC:5409]
ENSG00000008300	507.032	541.502	427.713	310.281	297.367	349.371	492.082	319.006	0.627375	1.59869e-08	1.55182e-07	CELSR3	protein_coding	cadherin EGF LAG seven-pass G-type receptor 3 [Source:HGNC Symbol;Acc:HGNC:3230]
ENSG00000110328	1031.87	1119.16	1085.08	875.72	820.69	751.303	1078.71	815.904	0.401907	1.62402e-08	1.57548e-07	GALNT18	protein_coding	polypeptide N-acetylgalactosaminyltransferase 18 [Source:HGNC Symbol;Acc:HGNC:30488]
ENSG00000180694	378.179	372.452	349.755	207.15	236.615	250.434	366.796	231.4	0.668012	1.63444e-08	1.58466e-07	TMEM64	protein_coding	transmembrane protein 64 [Source:HGNC Symbol;Acc:HGNC:25441]
ENSG00000144749	495.509	442.965	427.713	657.012	606.458	675.039	455.396	646.17	-0.506039	1.63905e-08	1.5882e-07	LRIG1	protein_coding	leucine rich repeats and immunoglobulin like domains 1 [Source:HGNC Symbol;Acc:HGNC:17360]
ENSG00000083937	513.318	533.366	560.451	806.374	711.975	709.048	535.712	742.466	-0.472885	1.64884e-08	1.59675e-07	CHMP2B	protein_coding	charged multivesicular body protein 2B [Source:HGNC Symbol;Acc:HGNC:24537]
ENSG00000134291	1257.1	1280.08	1304.21	1639.42	1501.76	1639.67	1280.46	1593.62	-0.316506	1.65478e-08	1.60156e-07	TMEM106C	protein_coding	transmembrane protein 106C [Source:HGNC Symbol;Acc:HGNC:28775]
ENSG00000029153	302.753	287.475	300.242	189.369	172.665	177.262	296.823	179.765	0.720889	1.69424e-08	1.63879e-07	ARNTL2	protein_coding	aryl hydrocarbon receptor nuclear translocator like 2 [Source:HGNC Symbol;Acc:HGNC:18984]
ENSG00000101577	548.936	585.799	578.36	743.251	802.571	778.098	571.032	774.64	-0.438204	1.6955e-08	1.63905e-07	LPIN2	protein_coding	lipin 2 [Source:HGNC Symbol;Acc:HGNC:14450]
ENSG00000197170	2173.74	2122.62	2274.46	2622.72	2610.22	2555.87	2190.27	2596.27	-0.246242	1.72865e-08	1.67012e-07	PSMD12	protein_coding	proteasome 26S subunit, non-ATPase 12 [Source:HGNC Symbol;Acc:HGNC:9557]
ENSG00000138172	340.466	335.388	355.023	529.877	505.204	473.042	343.625	502.708	-0.550727	1.74694e-08	1.68619e-07	CALHM2	protein_coding	calcium homeostasis modulator family member 2 [Source:HGNC Symbol;Acc:HGNC:23493]
ENSG00000065809	3153.24	3157.71	3324.78	2738.29	2738.12	2781.57	3211.91	2752.66	0.222328	1.74732e-08	1.68619e-07	FAM107B	protein_coding	family with sequence similarity 107 member B [Source:HGNC Symbol;Acc:HGNC:23726]
ENSG00000106554	582.459	531.558	611.018	407.188	415.674	360.708	575.012	394.523	0.541471	1.75261e-08	1.6903e-07	CHCHD3	protein_coding	coiled-coil-helix-coiled-coil-helix domain containing 3 [Source:HGNC Symbol;Acc:HGNC:21906]
ENSG00000180233	647.409	587.607	588.895	816.153	796.176	845.087	607.97	819.139	-0.431013	1.75363e-08	1.6903e-07	ZNRF2	protein_coding	zinc and ring finger 2 [Source:HGNC Symbol;Acc:HGNC:22316]
ENSG00000268460	71.2359	66.8968	70.5831	141.36	167.335	137.069	69.5719	148.588	-1.09445	1.82529e-08	1.75835e-07	AC006262.1	processed_transcript	uncharacterized LOC93429 [Source:NCBI gene;Acc:93429]
ENSG00000159423	549.983	585.799	546.756	790.371	767.398	729.66	560.846	762.477	-0.442633	1.84034e-08	1.77181e-07	ALDH4A1	protein_coding	aldehyde dehydrogenase 4 family member A1 [Source:HGNC Symbol;Acc:HGNC:406]
ENSG00000165494	1297.96	1341.55	1382.17	1656.31	1623.26	1660.29	1340.56	1646.62	-0.296886	1.84673e-08	1.77693e-07	PCF11	protein_coding	PCF11, cleavage and polyadenylation factor subunit [Source:HGNC Symbol;Acc:HGNC:30097]
ENSG00000120519	157.138	130.177	135.899	269.384	266.458	220.547	141.071	252.13	-0.840924	1.85603e-08	1.78484e-07	SLC10A7	protein_coding	solute carrier family 10 member 7 [Source:HGNC Symbol;Acc:HGNC:23088]
ENSG00000121671	326.847	321.828	314.99	451.64	472.163	498.807	321.222	474.204	-0.560836	1.89535e-08	1.82158e-07	CRY2	protein_coding	cryptochrome circadian regulator 2 [Source:HGNC Symbol;Acc:HGNC:2385]
ENSG00000152894	3515.7	3799.56	3581.83	4137.67	4214.3	4261.5	3632.36	4204.49	-0.209873	1.9232e-08	1.84728e-07	PTPRK	protein_coding	protein tyrosine phosphatase, receptor type K [Source:HGNC Symbol;Acc:HGNC:9674]
ENSG00000124635	180.185	158.202	156.968	280.053	265.392	289.597	165.118	278.347	-0.754944	1.9934e-08	1.91359e-07	HIST1H2BJ	protein_coding	histone cluster 1 H2B family member j [Source:HGNC Symbol;Acc:HGNC:4761]
ENSG00000122644	539.507	538.79	529.9	737.028	689.593	771.915	536.066	732.845	-0.451372	2.01853e-08	1.9366e-07	ARL4A	protein_coding	ADP ribosylation factor like GTPase 4A [Source:HGNC Symbol;Acc:HGNC:695]
ENSG00000104517	2696.49	2765.37	2699.02	3125.03	3169.78	3181.44	2720.29	3158.75	-0.214948	2.0662e-08	1.98118e-07	UBR5	protein_coding	ubiquitin protein ligase E3 component n-recognin 5 [Source:HGNC Symbol;Acc:HGNC:16806]
ENSG00000166183	28.2849	35.2564	30.5509	95.129	88.464	81.4169	31.3641	88.3366	-1.49078	2.07543e-08	1.98887e-07	ASPG	protein_coding	asparaginase [Source:HGNC Symbol;Acc:HGNC:20123]
ENSG00000134375	2297.36	2392.92	2401.93	2043.94	1860.94	1984.92	2364.07	1963.27	0.267105	2.08539e-08	1.99726e-07	TIMM17A	protein_coding	translocase of inner mitochondrial membrane 17A [Source:HGNC Symbol;Acc:HGNC:17315]
ENSG00000169991	591.887	566.814	575.2	777.924	758.872	790.465	577.967	775.754	-0.425324	2.11793e-08	2.02701e-07	IFFO2	protein_coding	intermediate filament family orphan 2 [Source:HGNC Symbol;Acc:HGNC:27006]
ENSG00000119707	4828.33	5198.06	5069.34	4460.39	4298.5	4414.03	5031.91	4390.97	0.19672	2.11891e-08	2.02701e-07	RBM25	protein_coding	RNA binding motif protein 25 [Source:HGNC Symbol;Acc:HGNC:23244]
ENSG00000104915	896.735	838.922	877.549	649.9	658.684	665.763	871.068	658.116	0.403947	2.1239e-08	2.03061e-07	STX10	protein_coding	syntaxin 10 [Source:HGNC Symbol;Acc:HGNC:11428]
ENSG00000112769	445.225	402.285	417.178	613.449	575.549	595.683	421.562	594.894	-0.498979	2.13289e-08	2.03802e-07	LAMA4	protein_coding	laminin subunit alpha 4 [Source:HGNC Symbol;Acc:HGNC:6484]
ENSG00000169032	1325.2	1328.9	1253.64	1030.42	1053.04	1023.38	1302.58	1035.61	0.331595	2.16595e-08	2.06842e-07	MAP2K1	protein_coding	mitogen-activated protein kinase kinase 1 [Source:HGNC Symbol;Acc:HGNC:6840]
ENSG00000231074	982.637	1055.88	972.362	757.476	766.333	787.374	1003.63	770.394	0.383106	2.20691e-08	2.10632e-07	HCG18	antisense	HLA complex group 18 [Source:HGNC Symbol;Acc:HGNC:31337]
ENSG00000123080	142.472	156.394	140.113	254.27	244.075	257.648	146.326	251.998	-0.782409	2.4029e-08	2.29205e-07	CDKN2C	protein_coding	cyclin dependent kinase inhibitor 2C [Source:HGNC Symbol;Acc:HGNC:1789]
ENSG00000112941	2721.63	2636.09	2570.49	2123.07	2299	2241.54	2642.74	2221.2	0.25176	2.44659e-08	2.33238e-07	TENT4A	protein_coding	terminal nucleotidyltransferase 4A [Source:HGNC Symbol;Acc:HGNC:16705]
ENSG00000146067	1085.3	990.795	1008.18	1278.46	1284.33	1342.86	1028.09	1301.88	-0.341194	2.44836e-08	2.33272e-07	FAM193B	protein_coding	family with sequence similarity 193 member B [Source:HGNC Symbol;Acc:HGNC:25524]
ENSG00000103064	2427.26	2447.16	2636.86	2124.84	2075.17	2090.04	2503.76	2096.69	0.255179	2.665e-08	2.53766e-07	SLC7A6	protein_coding	solute carrier family 7 member 6 [Source:HGNC Symbol;Acc:HGNC:11064]
ENSG00000196313	1804.99	1788.13	1800.4	2055.5	2202.01	2261.12	1797.84	2172.88	-0.272372	2.6964e-08	2.56609e-07	POM121	protein_coding	POM121 transmembrane nucleoporin [Source:HGNC Symbol;Acc:HGNC:19702]
ENSG00000172757	9864.08	9706.36	9842.66	9081.71	8723.83	8840.43	9804.37	8881.99	0.141948	2.76604e-08	2.62978e-07	CFL1	protein_coding	cofilin 1 [Source:HGNC Symbol;Acc:HGNC:1874]
ENSG00000119669	5452.69	5146.53	4966.1	6074.92	5902.57	5842.44	5188.44	5939.98	-0.19557	2.76652e-08	2.62978e-07	IRF2BPL	protein_coding	interferon regulatory factor 2 binding protein like [Source:HGNC Symbol;Acc:HGNC:14282]
ENSG00000072071	2878.77	2808.76	2637.91	2323.99	2348.03	2364.18	2775.15	2345.4	0.24319	2.79486e-08	2.6552e-07	ADGRL1	protein_coding	adhesion G protein-coupled receptor L1 [Source:HGNC Symbol;Acc:HGNC:20973]
ENSG00000184634	1446.72	1431.95	1424.3	1769.22	1676.55	1810.75	1434.32	1752.18	-0.289227	2.82769e-08	2.68484e-07	MED12	protein_coding	mediator complex subunit 12 [Source:HGNC Symbol;Acc:HGNC:11957]
ENSG00000223705	1845.85	1788.13	1784.59	1442.94	1524.14	1494.36	1806.19	1487.15	0.281074	2.8502e-08	2.70466e-07	NSUN5P1	transcribed_unprocessed_pseudogene	NOP2/Sun RNA methyltransferase family member 5 pseudogene 1 [Source:HGNC Symbol;Acc:HGNC:19146]
ENSG00000129493	751.12	685.24	784.842	978.851	977.367	962.574	740.401	972.931	-0.396038	2.85596e-08	2.70857e-07	HEATR5A	protein_coding	HEAT repeat containing 5A [Source:HGNC Symbol;Acc:HGNC:20276]
ENSG00000163382	1462.43	1453.65	1514.9	1195.78	1232.1	1129.53	1476.99	1185.8	0.316464	2.85899e-08	2.70989e-07	NAXE	protein_coding	NAD(P)HX epimerase [Source:HGNC Symbol;Acc:HGNC:18453]
ENSG00000101040	2698.58	2894.64	2840.18	3204.16	3342.45	3317.48	2811.14	3288.03	-0.22493	2.86802e-08	2.71689e-07	ZMYND8	protein_coding	zinc finger MYND-type containing 8 [Source:HGNC Symbol;Acc:HGNC:9397]
ENSG00000100097	877.878	865.138	923.902	711.245	561.693	658.549	888.973	643.829	0.46221	2.88315e-08	2.72966e-07	LGALS1	protein_coding	galectin 1 [Source:HGNC Symbol;Acc:HGNC:6561]
ENSG00000108861	1901.37	1928.25	1927.87	1609.19	1479.37	1633.49	1919.16	1574.02	0.285295	2.97065e-08	2.81089e-07	DUSP3	protein_coding	dual specificity phosphatase 3 [Source:HGNC Symbol;Acc:HGNC:3069]
ENSG00000115271	604.458	565.91	602.59	778.813	761.003	865.699	590.986	801.838	-0.440926	3.11077e-08	2.94179e-07	GCA	protein_coding	grancalcin [Source:HGNC Symbol;Acc:HGNC:15990]
ENSG00000187244	3476.94	3409.02	3236.29	3912.74	3874.3	3886.37	3374.08	3891.13	-0.20557	3.15387e-08	2.98084e-07	BCAM	protein_coding	basal cell adhesion molecule (Lutheran blood group) [Source:HGNC Symbol;Acc:HGNC:6722]
ENSG00000131037	1022.45	1110.12	962.88	1342.47	1372.79	1262.48	1031.82	1325.91	-0.36019	3.16453e-08	2.98921e-07	EPS8L1	protein_coding	EPS8 like 1 [Source:HGNC Symbol;Acc:HGNC:21295]
ENSG00000125818	2208.31	2228.39	2373.49	1905.25	1914.23	1871.56	2270.06	1897.01	0.258547	3.19785e-08	3.0182e-07	PSMF1	protein_coding	proteasome inhibitor subunit 1 [Source:HGNC Symbol;Acc:HGNC:9571]
ENSG00000104823	1324.15	1268.33	1237.84	999.299	1038.12	1005.86	1276.77	1014.43	0.332237	3.19888e-08	3.0182e-07	ECH1	protein_coding	enoyl-CoA hydratase 1 [Source:HGNC Symbol;Acc:HGNC:3149]
ENSG00000257337	231.517	247.699	250.728	348.51	398.621	387.503	243.315	378.211	-0.633971	3.25199e-08	3.06656e-07	AC068888.1	antisense	uncharacterized LOC283335 [Source:NCBI gene;Acc:283335]
ENSG00000135838	31.4276	48.8166	43.1927	100.463	105.517	109.243	41.1456	105.075	-1.34547	3.27343e-08	3.08502e-07	NPL	protein_coding	N-acetylneuraminate pyruvate lyase [Source:HGNC Symbol;Acc:HGNC:16781]
ENSG00000156261	3563.89	3693.79	3702.98	3227.27	3156.99	3134.04	3653.55	3172.77	0.203365	3.29166e-08	3.10043e-07	CCT8	protein_coding	chaperonin containing TCP1 subunit 8 [Source:HGNC Symbol;Acc:HGNC:1623]
ENSG00000040933	1086.35	1052.27	1069.28	848.16	792.978	853.332	1069.3	831.49	0.361739	3.32089e-08	3.12618e-07	INPP4A	protein_coding	inositol polyphosphate-4-phosphatase type I A [Source:HGNC Symbol;Acc:HGNC:6074]
ENSG00000223865	199.042	182.61	182.252	317.393	283.511	316.392	187.968	305.765	-0.703917	3.37537e-08	3.17565e-07	HLA-DPB1	protein_coding	major histocompatibility complex, class II, DP beta 1 [Source:HGNC Symbol;Acc:HGNC:4940]
ENSG00000178773	4236.44	3844.76	3734.59	3387.3	3278.5	3330.88	3938.59	3332.23	0.240605	3.38872e-08	3.1864e-07	CPNE7	protein_coding	copine 7 [Source:HGNC Symbol;Acc:HGNC:2320]
ENSG00000124664	134.091	137.41	133.792	277.386	204.64	247.342	135.098	243.123	-0.850474	3.49781e-08	3.28711e-07	SPDEF	protein_coding	SAM pointed domain containing ETS transcription factor [Source:HGNC Symbol;Acc:HGNC:17257]
ENSG00000228113	50.2842	75.0329	83.2249	136.026	172.665	154.589	69.514	154.426	-1.14705	3.50803e-08	3.29483e-07	AC003991.1	antisense	novel transcript, antisense to STEAP4
ENSG00000188215	164.471	130.177	142.22	243.601	261.129	252.495	145.623	252.408	-0.795746	3.54872e-08	3.33116e-07	DCUN1D3	protein_coding	defective in cullin neddylation 1 domain containing 3 [Source:HGNC Symbol;Acc:HGNC:28734]
ENSG00000107833	780.453	728.632	817.5	587.666	532.916	585.377	775.528	568.653	0.44517	3.56379e-08	3.34341e-07	NPM3	protein_coding	nucleophosmin/nucleoplasmin 3 [Source:HGNC Symbol;Acc:HGNC:7931]
ENSG00000124575	8.3807	5.42406	9.48132	45.3419	44.7649	39.1626	7.76203	43.0898	-2.48798	3.57382e-08	3.35092e-07	HIST1H1D	protein_coding	histone cluster 1 H1 family member d [Source:HGNC Symbol;Acc:HGNC:4717]
ENSG00000064601	9854.65	9652.12	9572.97	8790.99	8905.02	8736.34	9693.25	8810.78	0.137732	3.58561e-08	3.36006e-07	CTSA	protein_coding	cathepsin A [Source:HGNC Symbol;Acc:HGNC:9251]
ENSG00000130560	744.835	734.96	705.831	551.215	531.85	535.909	728.542	539.658	0.432511	3.64032e-08	3.40939e-07	UBAC1	protein_coding	UBA domain containing 1 [Source:HGNC Symbol;Acc:HGNC:30221]
ENSG00000112312	573.03	611.111	539.382	384.961	430.596	392.656	574.508	402.738	0.515405	3.66936e-08	3.43464e-07	GMNN	protein_coding	geminin, DNA replication inhibitor [Source:HGNC Symbol;Acc:HGNC:17493]
ENSG00000188554	1869.94	1864.97	1787.76	2161.3	2188.15	2239.48	1840.89	2196.31	-0.254014	3.67486e-08	3.43784e-07	NBR1	protein_coding	NBR1, autophagy cargo receptor [Source:HGNC Symbol;Acc:HGNC:6746]
ENSG00000125148	5245.27	5030.82	5477.04	7292.93	8521.32	6954.45	5251.04	7589.56	-0.531405	3.75664e-08	3.51236e-07	MT2A	protein_coding	metallothionein 2A [Source:HGNC Symbol;Acc:HGNC:7406]
ENSG00000162729	765.786	774.737	850.158	601.891	596.865	578.163	796.894	592.306	0.427023	3.76704e-08	3.52009e-07	IGSF8	protein_coding	immunoglobulin superfamily member 8 [Source:HGNC Symbol;Acc:HGNC:17813]
ENSG00000144909	511.223	519.806	515.152	373.404	359.185	347.31	515.393	359.966	0.516923	3.79228e-08	3.54168e-07	OSBPL11	protein_coding	oxysterol binding protein like 11 [Source:HGNC Symbol;Acc:HGNC:16397]
ENSG00000167721	2846.29	3004.03	2898.12	2391.56	2603.83	2389.95	2916.15	2461.78	0.24569	3.84991e-08	3.59347e-07	TSR1	protein_coding	TSR1, ribosome maturation factor [Source:HGNC Symbol;Acc:HGNC:25542]
ENSG00000188647	541.603	531.558	491.975	733.471	684.264	717.293	521.712	711.676	-0.44826	3.86349e-08	3.6041e-07	PTAR1	protein_coding	protein prenyltransferase alpha subunit repeat containing 1 [Source:HGNC Symbol;Acc:HGNC:30449]
ENSG00000102870	2127.65	2115.38	2117.49	1812.79	1771.41	1755.1	2120.18	1779.77	0.251953	3.92595e-08	3.6603e-07	ZNF629	protein_coding	zinc finger protein 629 [Source:HGNC Symbol;Acc:HGNC:29008]
ENSG00000166503	365.608	314.596	309.723	215.152	205.705	190.66	329.976	203.839	0.69256	3.93255e-08	3.6644e-07	HDGFL3	protein_coding	HDGF like 3 [Source:HGNC Symbol;Acc:HGNC:24937]
ENSG00000169026	180.185	188.938	155.915	84.4603	82.069	99.9676	175.013	88.8323	0.980931	3.96375e-08	3.69138e-07	SLC49A3	protein_coding	solute carrier family 49 member 3 [Source:HGNC Symbol;Acc:HGNC:26177]
ENSG00000090013	1883.56	1828.81	2062.71	1642.09	1502.82	1489.21	1925.03	1544.71	0.315444	3.98268e-08	3.70693e-07	BLVRB	protein_coding	biliverdin reductase B [Source:HGNC Symbol;Acc:HGNC:1063]
ENSG00000129625	3605.8	3610.62	3652.41	3165.04	3199.63	3114.45	3622.94	3159.71	0.197322	4.02824e-08	3.74721e-07	REEP5	protein_coding	receptor accessory protein 5 [Source:HGNC Symbol;Acc:HGNC:30077]
ENSG00000138760	3686.46	3739.89	3710.36	3294.84	3168.72	3245.34	3712.24	3236.3	0.197578	4.06104e-08	3.7756e-07	SCARB2	protein_coding	scavenger receptor class B member 2 [Source:HGNC Symbol;Acc:HGNC:1665]
ENSG00000120875	806.642	764.793	775.361	615.227	577.68	546.215	782.265	579.707	0.43026	4.10301e-08	3.81248e-07	DUSP4	protein_coding	dual specificity phosphatase 4 [Source:HGNC Symbol;Acc:HGNC:3070]
ENSG00000012779	411.702	345.332	307.616	522.765	533.981	531.786	354.883	529.511	-0.577567	4.1554e-08	3.85899e-07	ALOX5	protein_coding	arachidonate 5-lipoxygenase [Source:HGNC Symbol;Acc:HGNC:435]
ENSG00000251322	1073.78	1009.78	942.864	757.476	756.74	797.679	1008.81	770.632	0.388915	4.17182e-08	3.87206e-07	SHANK3	protein_coding	SH3 and multiple ankyrin repeat domains 3 [Source:HGNC Symbol;Acc:HGNC:14294]
ENSG00000248905	250.373	223.291	259.156	350.288	387.963	402.962	244.273	380.404	-0.639762	4.20948e-08	3.90482e-07	FMN1	protein_coding	formin 1 [Source:HGNC Symbol;Acc:HGNC:3768]
ENSG00000156502	1511.67	1543.15	1541.24	1230.45	1255.55	1265.57	1532.02	1250.52	0.293505	4.32875e-08	4.01321e-07	SUPV3L1	protein_coding	Suv3 like RNA helicase [Source:HGNC Symbol;Acc:HGNC:11471]
ENSG00000132382	4507.77	4442.31	4240.26	3739.37	3896.68	3875.03	4396.78	3837.03	0.197215	4.40795e-08	4.08434e-07	MYBBP1A	protein_coding	MYB binding protein 1a [Source:HGNC Symbol;Acc:HGNC:7546]
ENSG00000165175	2094.13	2102.73	2051.13	1825.23	1672.29	1663.38	2082.66	1720.3	0.274497	4.41741e-08	4.09081e-07	MID1IP1	protein_coding	MID1 interacting protein 1 [Source:HGNC Symbol;Acc:HGNC:20715]
ENSG00000137449	1285.39	1313.53	1227.3	1028.64	966.709	1037.81	1275.41	1011.05	0.335082	4.47147e-08	4.13855e-07	CPEB2	protein_coding	cytoplasmic polyadenylation element binding protein 2 [Source:HGNC Symbol;Acc:HGNC:21745]
ENSG00000160803	2204.12	2109.96	2216.52	1803.89	1822.57	1850.95	2176.87	1825.8	0.253327	4.53734e-08	4.19717e-07	UBQLN4	protein_coding	ubiquilin 4 [Source:HGNC Symbol;Acc:HGNC:1237]
ENSG00000122873	1484.43	1624.51	1644.48	1294.47	1308.84	1188.27	1584.47	1263.86	0.326259	4.5679e-08	4.22307e-07	CISD1	protein_coding	CDGSH iron sulfur domain 1 [Source:HGNC Symbol;Acc:HGNC:30880]
ENSG00000105409	86.9497	64.1847	74.7971	27.5607	19.185	24.7342	75.3105	23.8266	1.65021	4.59642e-08	4.24568e-07	ATP1A3	protein_coding	ATPase Na+/K+ transporting subunit alpha 3 [Source:HGNC Symbol;Acc:HGNC:801]
ENSG00000115233	1573.48	1685.98	1604.45	1286.46	1349.34	1328.44	1621.3	1321.41	0.296674	4.5975e-08	4.24568e-07	PSMD14	protein_coding	proteasome 26S subunit, non-ATPase 14 [Source:HGNC Symbol;Acc:HGNC:16889]
ENSG00000105618	1072.73	1106.51	1077.71	852.605	827.085	874.974	1085.65	851.555	0.35062	4.7003e-08	4.33819e-07	PRPF31	protein_coding	pre-mRNA processing factor 31 [Source:HGNC Symbol;Acc:HGNC:15446]
ENSG00000177370	595.03	583.087	580.467	384.961	430.596	435.941	586.195	417.166	0.492941	4.72934e-08	4.36256e-07	TIMM22	protein_coding	translocase of inner mitochondrial membrane 22 [Source:HGNC Symbol;Acc:HGNC:17317]
ENSG00000125089	731.216	700.608	694.243	961.07	932.602	885.28	708.689	926.317	-0.38741	4.7865e-08	4.41282e-07	SH3TC1	protein_coding	SH3 domain and tetratricopeptide repeats 1 [Source:HGNC Symbol;Acc:HGNC:26009]
ENSG00000117122	1061.21	988.083	992.378	1278.46	1258.75	1278.97	1013.89	1272.06	-0.328061	4.79502e-08	4.41821e-07	MFAP2	protein_coding	microfibril associated protein 2 [Source:HGNC Symbol;Acc:HGNC:7033]
ENSG00000071794	2085.75	2353.14	2250.23	1823.45	1848.15	1859.19	2229.71	1843.6	0.275521	4.83396e-08	4.45161e-07	HLTF	protein_coding	helicase like transcription factor [Source:HGNC Symbol;Acc:HGNC:11099]
ENSG00000164506	276.563	304.651	308.67	450.751	432.727	433.88	296.628	439.12	-0.565889	4.90873e-08	4.51794e-07	STXBP5	protein_coding	syntaxin binding protein 5 [Source:HGNC Symbol;Acc:HGNC:19665]
ENSG00000041357	1736.9	1665.19	1728.76	2129.29	1985.64	2049.85	1710.28	2054.93	-0.266369	4.92015e-08	4.52594e-07	PSMA4	protein_coding	proteasome subunit alpha 4 [Source:HGNC Symbol;Acc:HGNC:9533]
ENSG00000101166	4254.25	4479.37	4342.44	3910.96	3789.03	3724.57	4358.69	3808.18	0.194736	4.92856e-08	4.53115e-07	PRELID3B	protein_coding	PRELI domain containing 3B [Source:HGNC Symbol;Acc:HGNC:15892]
ENSG00000115053	18884.9	19205.7	19209.1	17798.9	17635.2	17723.1	19099.9	17719.1	0.108253	4.99493e-08	4.58962e-07	NCL	protein_coding	nucleolin [Source:HGNC Symbol;Acc:HGNC:7667]
ENSG00000171365	310.086	335.388	271.798	464.087	435.925	477.165	305.757	459.059	-0.58411	5.01278e-08	4.60225e-07	CLCN5	protein_coding	chloride voltage-gated channel 5 [Source:HGNC Symbol;Acc:HGNC:2023]
ENSG00000119471	1015.11	947.403	954.453	699.687	769.53	763.67	972.322	744.296	0.386727	5.01425e-08	4.60225e-07	HSDL2	protein_coding	hydroxysteroid dehydrogenase like 2 [Source:HGNC Symbol;Acc:HGNC:18572]
ENSG00000161533	1671.95	1672.42	1671.87	1957.7	2071.98	1986.98	1672.08	2005.55	-0.261669	5.02547e-08	4.60998e-07	ACOX1	protein_coding	acyl-CoA oxidase 1 [Source:HGNC Symbol;Acc:HGNC:119]
ENSG00000106263	13455.2	12682.4	12970.4	12030.7	11714.6	11683.8	13036	11809.7	0.141989	5.07741e-08	4.65504e-07	EIF3B	protein_coding	eukaryotic translation initiation factor 3 subunit B [Source:HGNC Symbol;Acc:HGNC:3280]
ENSG00000179632	3581.7	3468.69	3517.57	3135.7	2996.05	3030.98	3522.65	3054.24	0.204861	5.10506e-08	4.6778e-07	MAF1	protein_coding	MAF1 homolog, negative regulator of RNA polymerase III [Source:HGNC Symbol;Acc:HGNC:24966]
ENSG00000157456	703.979	693.376	750.078	910.393	964.577	927.534	715.811	934.168	-0.384253	5.34331e-08	4.8934e-07	CCNB2	protein_coding	cyclin B2 [Source:HGNC Symbol;Acc:HGNC:1580]
ENSG00000117523	5791.06	6055.96	5697.22	6495.44	6564.45	6660.73	5848.08	6573.54	-0.167901	5.36756e-08	4.91288e-07	PRRC2C	protein_coding	proline rich coiled-coil 2C [Source:HGNC Symbol;Acc:HGNC:24903]
ENSG00000160233	511.223	446.581	432.98	331.618	299.499	296.811	463.595	309.309	0.581099	5.37251e-08	4.91468e-07	LRRC3	protein_coding	leucine rich repeat containing 3 [Source:HGNC Symbol;Acc:HGNC:14965]
ENSG00000127616	7354.06	7298.98	7439.67	6606.58	6722.2	6628.78	7364.24	6652.52	0.14665	5.38949e-08	4.92749e-07	SMARCA4	protein_coding	SWI/SNF related, matrix associated, actin dependent regulator of chromatin, subfamily a, member 4 [Source:HGNC Symbol;Acc:HGNC:11100]
ENSG00000110172	680.932	724.112	706.885	917.506	897.43	936.81	703.976	917.248	-0.38114	5.41794e-08	4.95076e-07	CHORDC1	protein_coding	cysteine and histidine rich domain containing 1 [Source:HGNC Symbol;Acc:HGNC:14525]
ENSG00000177888	705.026	704.224	648.944	938.843	933.668	850.24	686.065	907.584	-0.40354	5.5207e-08	5.04187e-07	ZBTB41	protein_coding	zinc finger and BTB domain containing 41 [Source:HGNC Symbol;Acc:HGNC:24819]
ENSG00000074370	1499.1	1420.2	1373.74	1171.78	1146.83	1133.65	1431.01	1150.75	0.313866	5.62789e-08	5.13693e-07	ATP2A3	protein_coding	ATPase sarcoplasmic/endoplasmic reticulum Ca2+ transporting 3 [Source:HGNC Symbol;Acc:HGNC:813]
ENSG00000153066	1698.14	1704.06	1691.89	1441.16	1397.3	1348.02	1698.03	1395.49	0.282361	5.63379e-08	5.13948e-07	TXNDC11	protein_coding	thioredoxin domain containing 11 [Source:HGNC Symbol;Acc:HGNC:28030]
ENSG00000147408	329.99	375.164	375.039	225.82	204.64	252.495	360.064	227.652	0.661803	5.67732e-08	5.17633e-07	CSGALNACT1	protein_coding	chondroitin sulfate N-acetylgalactosaminyltransferase 1 [Source:HGNC Symbol;Acc:HGNC:24290]
ENSG00000177565	1425.77	1497.94	1395.86	1662.53	1840.69	1841.67	1439.86	1781.63	-0.305095	5.73057e-08	5.22199e-07	TBL1XR1	protein_coding	transducin beta like 1 X-linked receptor 1 [Source:HGNC Symbol;Acc:HGNC:29529]
ENSG00000159658	3981.88	4056.29	3975.83	3501.1	3603.58	3372.1	4004.67	3492.26	0.197868	5.7538e-08	5.24027e-07	EFCAB14	protein_coding	EF-hand calcium binding domain 14 [Source:HGNC Symbol;Acc:HGNC:29051]
ENSG00000108176	54.4745	73.2248	69.5297	146.694	147.085	128.824	65.743	140.868	-1.09646	5.76635e-08	5.24881e-07	DNAJC12	protein_coding	DnaJ heat shock protein family (Hsp40) member C12 [Source:HGNC Symbol;Acc:HGNC:28908]
ENSG00000174903	1873.09	1805.31	1810.93	1486.5	1487.9	1565.47	1829.78	1513.29	0.274033	5.79484e-08	5.27184e-07	RAB1B	protein_coding	RAB1B, member RAS oncogene family [Source:HGNC Symbol;Acc:HGNC:18370]
ENSG00000182087	3680.17	3524.74	3443.83	3168.6	2960.88	3005.21	3549.58	3044.9	0.22027	5.81163e-08	5.2842e-07	TMEM259	protein_coding	transmembrane protein 259 [Source:HGNC Symbol;Acc:HGNC:17039]
ENSG00000101187	2374.88	2293.47	2283.94	1925.7	1957.93	1993.17	2317.43	1958.93	0.242655	5.91288e-08	5.3733e-07	SLCO4A1	protein_coding	solute carrier organic anion transporter family member 4A1 [Source:HGNC Symbol;Acc:HGNC:10953]
ENSG00000048405	1382.82	1350.59	1354.77	1074.87	1108.46	1118.19	1362.73	1100.51	0.308782	6.04691e-08	5.49209e-07	ZNF800	protein_coding	zinc finger protein 800 [Source:HGNC Symbol;Acc:HGNC:27267]
ENSG00000126005	917.686	834.401	815.393	1102.43	1116.99	1079.03	855.827	1099.48	-0.361981	6.18644e-08	5.61572e-07	MMP24OS	protein_coding	MMP24 opposite strand [Source:HGNC Symbol;Acc:HGNC:44421]
ENSG00000188643	4944.61	4833.74	4942.93	4423.94	4291.04	4326.43	4907.09	4347.14	0.17407	6.20201e-08	5.62677e-07	S100A16	protein_coding	S100 calcium binding protein A16 [Source:HGNC Symbol;Acc:HGNC:20441]
ENSG00000142102	3502.08	3239.97	3307.93	3847.83	3867.9	3860.6	3349.99	3858.78	-0.204569	6.36863e-08	5.77476e-07	PGGHG	protein_coding	protein-glucosylgalactosylhydroxylysine glucosidase [Source:HGNC Symbol;Acc:HGNC:26210]
ENSG00000167969	3797.5	3560.9	3635.56	3247.72	3133.54	3127.85	3664.65	3169.71	0.20827	6.4749e-08	5.8679e-07	ECI1	protein_coding	enoyl-CoA delta isomerase 1 [Source:HGNC Symbol;Acc:HGNC:2703]
ENSG00000203668	742.739	806.377	699.511	942.399	1041.32	986.278	749.542	989.998	-0.398492	6.49188e-08	5.88006e-07	CHML	protein_coding	CHM like, Rab escort protein 2 [Source:HGNC Symbol;Acc:HGNC:1941]
ENSG00000116704	225.231	262.163	210.696	353.844	373.041	367.922	232.697	364.936	-0.644921	6.5391e-08	5.91959e-07	SLC35D1	protein_coding	solute carrier family 35 member D1 [Source:HGNC Symbol;Acc:HGNC:20800]
ENSG00000117009	23.0469	40.6805	23.1766	74.6807	89.5298	95.8452	28.968	86.6852	-1.56514	6.54603e-08	5.92262e-07	KMO	protein_coding	kynurenine 3-monooxygenase [Source:HGNC Symbol;Acc:HGNC:6381]
ENSG00000100897	2159.08	2167.82	2005.83	2487.58	2472.73	2548.66	2110.91	2502.99	-0.245095	6.56814e-08	5.93937e-07	DCAF11	protein_coding	DDB1 and CUL4 associated factor 11 [Source:HGNC Symbol;Acc:HGNC:20258]
ENSG00000142002	2855.72	2664.12	2799.1	2408.45	2369.34	2275.55	2772.98	2351.12	0.236882	6.61307e-08	5.97598e-07	DPP9	protein_coding	dipeptidyl peptidase 9 [Source:HGNC Symbol;Acc:HGNC:18648]
ENSG00000105429	2548.78	2400.15	2113.28	1766.55	1959	1913.81	2354.07	1879.79	0.325826	6.61586e-08	5.97598e-07	MEGF8	protein_coding	multiple EGF like domains 8 [Source:HGNC Symbol;Acc:HGNC:3233]
ENSG00000147679	511.223	517.094	475.119	681.017	676.803	685.345	501.145	681.055	-0.44164	6.62099e-08	5.97734e-07	UTP23	protein_coding	UTP23, small subunit processome component [Source:HGNC Symbol;Acc:HGNC:28224]
ENSG00000158623	1173.3	1186.06	1194.65	1457.16	1484.7	1426.34	1184.67	1456.07	-0.297485	6.64958e-08	5.99987e-07	COPG2	protein_coding	coatomer protein complex subunit gamma 2 [Source:HGNC Symbol;Acc:HGNC:2237]
ENSG00000069956	1527.38	1450.03	1486.46	1227.79	1190.53	1210.95	1487.96	1209.76	0.297576	6.65938e-08	6.00543e-07	MAPK6	protein_coding	mitogen-activated protein kinase 6 [Source:HGNC Symbol;Acc:HGNC:6879]
ENSG00000165119	10868.7	11134.7	10966.7	12044.9	11919.2	11959	10990	11974.4	-0.123641	6.81012e-08	6.13803e-07	HNRNPK	protein_coding	heterogeneous nuclear ribonucleoprotein K [Source:HGNC Symbol;Acc:HGNC:5044]
ENSG00000223764	158.186	180.802	149.594	264.05	276.05	276.199	162.861	272.1	-0.736472	6.82904e-08	6.15172e-07	LINC02593	lincRNA	long intergenic non-protein coding RNA 2593 [Source:HGNC Symbol;Acc:HGNC:53933]
ENSG00000171843	223.136	235.043	259.156	372.515	361.317	366.891	239.112	366.908	-0.618726	6.86898e-08	6.18433e-07	MLLT3	protein_coding	MLLT3, super elongation complex subunit [Source:HGNC Symbol;Acc:HGNC:7136]
ENSG00000090372	2692.3	2728.3	2581.03	2264.43	2243.57	2315.74	2667.21	2274.58	0.230254	6.89647e-08	6.20569e-07	STRN4	protein_coding	striatin 4 [Source:HGNC Symbol;Acc:HGNC:15721]
ENSG00000101193	3362.76	3293.31	3352.17	2884.99	2902.26	2924.82	3336.08	2904.02	0.199971	7.36497e-08	6.62366e-07	GID8	protein_coding	GID complex subunit 8 homolog [Source:HGNC Symbol;Acc:HGNC:15857]
ENSG00000254999	1649.95	1711.29	1739.3	1380.7	1373.86	1441.8	1700.18	1398.79	0.281846	7.40671e-08	6.65758e-07	BRK1	protein_coding	BRICK1, SCAR/WAVE actin nucleating complex subunit [Source:HGNC Symbol;Acc:HGNC:23057]
ENSG00000134590	1082.16	1020.63	931.276	771.701	743.95	798.71	1011.35	771.454	0.390671	7.41788e-08	6.66399e-07	RTL8C	protein_coding	retrotransposon Gag like 8C [Source:HGNC Symbol;Acc:HGNC:2569]
ENSG00000173638	1422.62	1361.44	1233.62	997.521	1059.44	1092.43	1339.23	1049.8	0.352715	7.44008e-08	6.6803e-07	SLC19A1	protein_coding	solute carrier family 19 member 1 [Source:HGNC Symbol;Acc:HGNC:10937]
ENSG00000274750	48.189	65.0887	58.9949	123.579	131.097	125.732	57.4242	126.803	-1.13781	7.61403e-08	6.83278e-07	HIST1H3E	protein_coding	histone cluster 1 H3 family member e [Source:HGNC Symbol;Acc:HGNC:4769]
ENSG00000137075	678.837	683.432	760.612	926.396	1002.95	885.28	707.627	938.208	-0.407232	7.62624e-08	6.84001e-07	RNF38	protein_coding	ring finger protein 38 [Source:HGNC Symbol;Acc:HGNC:18052]
ENSG00000137992	378.179	367.028	383.467	549.437	514.796	527.664	376.225	530.632	-0.497795	7.81125e-08	7.00215e-07	DBT	protein_coding	dihydrolipoamide branched chain transacylase E2 [Source:HGNC Symbol;Acc:HGNC:2698]
ENSG00000107581	6581.99	7078.4	6999.32	5898	6289.47	6024.85	6886.57	6070.77	0.182739	7.93104e-08	7.10568e-07	EIF3A	protein_coding	eukaryotic translation initiation factor 3 subunit A [Source:HGNC Symbol;Acc:HGNC:3271]
ENSG00000136108	809.785	826.265	828.035	1017.97	1025.33	1134.68	821.362	1059.33	-0.366279	8.02716e-08	7.1879e-07	CKAP2	protein_coding	cytoskeleton associated protein 2 [Source:HGNC Symbol;Acc:HGNC:1990]
ENSG00000140374	2877.72	2721.97	2791.72	2491.14	2289.41	2306.47	2797.14	2362.34	0.24206	8.06399e-08	7.21697e-07	ETFA	protein_coding	electron transfer flavoprotein subunit alpha [Source:HGNC Symbol;Acc:HGNC:3481]
ENSG00000143382	801.404	768.409	744.81	953.068	1010.41	1028.53	771.541	997.336	-0.369393	8.16776e-08	7.30588e-07	ADAMTSL4	protein_coding	ADAMTS like 4 [Source:HGNC Symbol;Acc:HGNC:19706]
ENSG00000218891	486.081	466.469	439.301	630.341	628.84	651.335	463.95	636.839	-0.456592	8.21467e-08	7.34386e-07	ZNF579	protein_coding	zinc finger protein 579 [Source:HGNC Symbol;Acc:HGNC:26646]
ENSG00000178585	111.044	99.4411	75.8505	198.26	190.784	167.987	95.4453	185.677	-0.959727	8.36582e-08	7.47495e-07	CTNNBIP1	protein_coding	catenin beta interacting protein 1 [Source:HGNC Symbol;Acc:HGNC:16913]
ENSG00000124233	153.995	131.081	153.808	253.381	236.615	254.557	146.295	248.184	-0.766372	8.38695e-08	7.48977e-07	SEMG1	protein_coding	semenogelin 1 [Source:HGNC Symbol;Acc:HGNC:10742]
ENSG00000164405	1275.96	1280.98	1262.07	1068.65	997.618	981.125	1273	1015.8	0.324363	8.68703e-08	7.75356e-07	UQCRQ	protein_coding	ubiquinol-cytochrome c reductase complex III subunit VII [Source:HGNC Symbol;Acc:HGNC:29594]
ENSG00000136522	941.781	888.642	890.19	737.028	682.132	635.876	906.871	685.012	0.402547	8.69945e-08	7.76024e-07	MRPL47	protein_coding	mitochondrial ribosomal protein L47 [Source:HGNC Symbol;Acc:HGNC:16652]
ENSG00000091640	756.358	795.529	864.907	609.003	596.865	602.897	805.598	602.922	0.417455	8.7039e-08	7.76024e-07	SPAG7	protein_coding	sperm associated antigen 7 [Source:HGNC Symbol;Acc:HGNC:11216]
ENSG00000197622	935.495	894.97	928.116	1150.44	1124.45	1210.95	919.527	1161.95	-0.338221	8.70869e-08	7.76031e-07	CDC42SE1	protein_coding	CDC42 small effector 1 [Source:HGNC Symbol;Acc:HGNC:17719]
ENSG00000135956	2823.25	2757.23	2928.67	2394.23	2395.99	2485.79	2836.38	2425.34	0.225511	8.71555e-08	7.76224e-07	TMEM127	protein_coding	transmembrane protein 127 [Source:HGNC Symbol;Acc:HGNC:26038]
ENSG00000141458	2662.97	2693.05	2762.22	2292.88	2325.64	2346.66	2706.08	2321.73	0.22119	8.73754e-08	7.77764e-07	NPC1	protein_coding	NPC intracellular cholesterol transporter 1 [Source:HGNC Symbol;Acc:HGNC:7897]
ENSG00000154582	1633.19	1638.97	1730.87	1436.71	1334.42	1252.17	1667.68	1341.1	0.312611	8.87057e-08	7.8918e-07	ELOC	protein_coding	elongin C [Source:HGNC Symbol;Acc:HGNC:11617]
ENSG00000198301	695.598	684.336	717.42	900.614	908.088	904.861	699.118	904.521	-0.372106	9.37196e-08	8.33338e-07	SDAD1	protein_coding	SDA1 domain containing 1 [Source:HGNC Symbol;Acc:HGNC:25537]
ENSG00000105974	1153.39	1176.12	1156.72	1410.93	1474.04	1405.73	1162.08	1430.24	-0.298766	9.4141e-08	8.36634e-07	CAV1	protein_coding	caveolin 1 [Source:HGNC Symbol;Acc:HGNC:1527]
ENSG00000133895	1532.62	1456.36	1469.6	1219.78	1217.18	1199.61	1486.19	1212.19	0.29343	9.50395e-08	8.44165e-07	MEN1	protein_coding	menin 1 [Source:HGNC Symbol;Acc:HGNC:7010]
ENSG00000174306	518.556	531.558	515.152	709.467	675.737	719.354	521.755	701.519	-0.427029	9.67266e-08	8.58689e-07	ZHX3	protein_coding	zinc fingers and homeoboxes 3 [Source:HGNC Symbol;Acc:HGNC:15935]
ENSG00000065833	861.117	864.234	933.383	1097.1	1140.44	1136.74	886.245	1124.76	-0.343925	9.88926e-08	8.77446e-07	ME1	protein_coding	malic enzyme 1 [Source:HGNC Symbol;Acc:HGNC:6983]
ENSG00000106066	1755.76	1847.8	1827.79	2186.19	2178.56	2096.23	1810.45	2153.66	-0.250222	9.8948e-08	8.77467e-07	CPVL	protein_coding	carboxypeptidase, vitellogenic like [Source:HGNC Symbol;Acc:HGNC:14399]
ENSG00000168061	818.166	731.344	761.666	601.891	567.022	546.215	770.392	571.709	0.427911	1.00668e-07	8.9224e-07	SAC3D1	protein_coding	SAC3 domain containing 1 [Source:HGNC Symbol;Acc:HGNC:30179]
ENSG00000189067	5867.54	5978.22	5852.08	5062.29	5221.51	5429.17	5899.28	5237.65	0.172401	1.02982e-07	9.12259e-07	LITAF	protein_coding	lipopolysaccharide induced TNF factor [Source:HGNC Symbol;Acc:HGNC:16841]
ENSG00000159322	941.781	979.947	1010.29	786.815	745.016	740.997	977.338	757.609	0.366337	1.03914e-07	9.20027e-07	ADPGK	protein_coding	ADP dependent glucokinase [Source:HGNC Symbol;Acc:HGNC:25250]
ENSG00000011566	827.594	867.85	803.805	1106.87	1022.13	1069.76	833.083	1066.25	-0.355946	1.04907e-07	9.2793e-07	MAP4K3	protein_coding	mitogen-activated protein kinase kinase kinase kinase 3 [Source:HGNC Symbol;Acc:HGNC:6865]
ENSG00000185215	10926.3	10148.4	10171.3	11692.9	11523.8	11504.5	10415.4	11573.7	-0.152529	1.04919e-07	9.2793e-07	TNFAIP2	protein_coding	TNF alpha induced protein 2 [Source:HGNC Symbol;Acc:HGNC:11895]
ENSG00000104980	1786.14	1698.64	1825.68	1463.39	1471.91	1453.14	1770.15	1462.81	0.274266	1.05121e-07	9.29218e-07	TIMM44	protein_coding	translocase of inner mitochondrial membrane 44 [Source:HGNC Symbol;Acc:HGNC:17316]
ENSG00000132646	3120.76	3164.04	3241.56	2719.62	2745.58	2796	3175.45	2753.73	0.205748	1.05573e-07	9.32716e-07	PCNA	protein_coding	proliferating cell nuclear antigen [Source:HGNC Symbol;Acc:HGNC:8729]
ENSG00000177189	493.414	517.094	502.51	652.567	684.264	714.201	504.339	683.677	-0.437225	1.09115e-07	9.63488e-07	RPS6KA3	protein_coding	ribosomal protein S6 kinase A3 [Source:HGNC Symbol;Acc:HGNC:10432]
ENSG00000171617	1654.14	1632.64	1622.36	1315.8	1372.79	1364.51	1636.38	1351.03	0.277163	1.0967e-07	9.67869e-07	ENC1	protein_coding	ectodermal-neural cortex 1 [Source:HGNC Symbol;Acc:HGNC:3345]
ENSG00000153130	1152.35	1195.1	1178.84	951.29	923.01	941.963	1175.43	938.754	0.324294	1.15445e-07	1.01829e-06	SCOC	protein_coding	short coiled-coil protein [Source:HGNC Symbol;Acc:HGNC:20335]
ENSG00000172432	1705.47	1735.7	1819.36	2091.06	2115.67	2057.06	1753.51	2087.93	-0.252073	1.16311e-07	1.02539e-06	GTPBP2	protein_coding	GTP binding protein 2 [Source:HGNC Symbol;Acc:HGNC:4670]
ENSG00000083290	199.042	166.338	163.289	282.72	286.709	291.658	176.223	287.029	-0.705025	1.17502e-07	1.03534e-06	ULK2	protein_coding	unc-51 like autophagy activating kinase 2 [Source:HGNC Symbol;Acc:HGNC:13480]
ENSG00000069849	3669.7	3625.99	3818.86	3254.83	3186.84	3256.68	3704.85	3232.78	0.195982	1.1769e-07	1.03644e-06	ATP1B3	protein_coding	ATPase Na+/K+ transporting subunit beta 3 [Source:HGNC Symbol;Acc:HGNC:806]
ENSG00000130734	547.888	592.127	467.745	368.069	371.975	365.861	535.92	368.635	0.541919	1.18606e-07	1.04395e-06	ATG4D	protein_coding	autophagy related 4D cysteine peptidase [Source:HGNC Symbol;Acc:HGNC:20789]
ENSG00000140416	1531.57	1629.93	1630.79	1867.91	1960.06	1938.55	1597.43	1922.17	-0.265854	1.23272e-07	1.08444e-06	TPM1	protein_coding	tropomyosin 1 [Source:HGNC Symbol;Acc:HGNC:12010]
ENSG00000156928	1550.43	1510.6	1598.13	1312.25	1266.21	1219.19	1553.05	1265.88	0.293488	1.24071e-07	1.09089e-06	MALSU1	protein_coding	mitochondrial assembly of ribosomal large subunit 1 [Source:HGNC Symbol;Acc:HGNC:21721]
ENSG00000143772	128.853	122.945	129.578	208.928	240.878	214.363	127.126	221.39	-0.799726	1.24185e-07	1.09131e-06	ITPKB	protein_coding	inositol-trisphosphate 3-kinase B [Source:HGNC Symbol;Acc:HGNC:6179]
ENSG00000143816	1612.24	1668.8	1588.65	1402.93	1293.92	1256.29	1623.23	1317.71	0.299861	1.24942e-07	1.09737e-06	WNT9A	protein_coding	Wnt family member 9A [Source:HGNC Symbol;Acc:HGNC:12778]
ENSG00000119878	218.946	249.507	276.012	403.631	342.132	420.482	248.155	388.748	-0.648746	1.25248e-07	1.09948e-06	CRIPT	protein_coding	CXXC repeat containing interactor of PDZ3 domain [Source:HGNC Symbol;Acc:HGNC:14312]
ENSG00000074527	3046.38	2854.86	2843.34	3411.31	3293.42	3425.69	2914.86	3376.81	-0.212914	1.26447e-07	1.10941e-06	NTN4	protein_coding	netrin 4 [Source:HGNC Symbol;Acc:HGNC:13658]
ENSG00000132535	258.754	260.355	228.605	135.137	137.492	165.926	249.238	146.185	0.772448	1.31461e-07	1.1528e-06	DLG4	protein_coding	discs large MAGUK scaffold protein 4 [Source:HGNC Symbol;Acc:HGNC:2903]
ENSG00000106153	9471.24	9358.31	9597.2	8707.42	8678	8563.2	9475.58	8649.54	0.131272	1.35028e-07	1.18344e-06	CHCHD2	protein_coding	coiled-coil-helix-coiled-coil-helix domain containing 2 [Source:HGNC Symbol;Acc:HGNC:21645]
ENSG00000155729	222.089	229.619	224.391	360.957	332.539	341.126	225.366	344.874	-0.614467	1.35728e-07	1.18895e-06	KCTD18	protein_coding	potassium channel tetramerization domain containing 18 [Source:HGNC Symbol;Acc:HGNC:26446]
ENSG00000143882	1299.01	1324.38	1329.49	1023.3	1076.49	1093.46	1317.62	1064.42	0.309035	1.40723e-07	1.23206e-06	ATP6V1C2	protein_coding	ATPase H+ transporting V1 subunit C2 [Source:HGNC Symbol;Acc:HGNC:18264]
ENSG00000097033	730.168	829.881	841.73	969.96	1083.95	1114.07	800.593	1055.99	-0.397293	1.41519e-07	1.23836e-06	SH3GLB1	protein_coding	SH3 domain containing GRB2 like, endophilin B1 [Source:HGNC Symbol;Acc:HGNC:10833]
ENSG00000130706	2486.97	2398.34	2386.13	2116.84	2016.55	2045.73	2423.81	2059.71	0.233877	1.43022e-07	1.25086e-06	ADRM1	protein_coding	adhesion regulating molecule 1 [Source:HGNC Symbol;Acc:HGNC:15759]
ENSG00000151327	992.065	956.443	1039.78	1310.47	1219.31	1221.25	996.098	1250.34	-0.330059	1.43568e-07	1.25496e-06	FAM177A1	protein_coding	family with sequence similarity 177 member A1 [Source:HGNC Symbol;Acc:HGNC:19829]
ENSG00000198915	583.506	685.24	637.355	451.64	454.044	473.042	635.367	459.576	0.469237	1.44272e-07	1.26045e-06	RASGEF1A	protein_coding	RasGEF domain family member 1A [Source:HGNC Symbol;Acc:HGNC:24246]
ENSG00000130159	1080.06	1103.8	1106.15	874.831	879.311	861.576	1096.67	871.906	0.330993	1.45988e-07	1.27477e-06	ECSIT	protein_coding	ECSIT signalling integrator [Source:HGNC Symbol;Acc:HGNC:29548]
ENSG00000165688	2024.99	1975.26	1996.34	1620.75	1685.08	1725.21	1998.86	1677.01	0.253868	1.48544e-07	1.29641e-06	PMPCA	protein_coding	peptidase, mitochondrial processing alpha subunit [Source:HGNC Symbol;Acc:HGNC:18667]
ENSG00000147862	1280.15	1250.25	1102.99	1524.73	1551.85	1470.66	1211.13	1515.75	-0.322942	1.50924e-07	1.31648e-06	NFIB	protein_coding	nuclear factor I B [Source:HGNC Symbol;Acc:HGNC:7785]
ENSG00000146066	832.832	848.866	764.826	609.892	589.405	646.182	815.508	615.16	0.407604	1.51799e-07	1.32341e-06	HIGD2A	protein_coding	HIG1 hypoxia inducible domain family member 2A [Source:HGNC Symbol;Acc:HGNC:28311]
ENSG00000136051	1654.14	1667.9	1618.14	1382.48	1354.67	1356.26	1646.73	1364.47	0.271186	1.57533e-07	1.37268e-06	WASHC4	protein_coding	WASH complex subunit 4 [Source:HGNC Symbol;Acc:HGNC:29174]
ENSG00000114626	342.561	309.172	342.381	488.092	495.611	448.308	331.371	477.337	-0.528708	1.60875e-07	1.40106e-06	ABTB1	protein_coding	ankyrin repeat and BTB domain containing 1 [Source:HGNC Symbol;Acc:HGNC:18275]
ENSG00000204175	2141.27	1929.16	1945.78	2489.36	2283.01	2471.36	2005.4	2414.58	-0.269217	1.63003e-07	1.41885e-06	GPRIN2	protein_coding	G protein regulated inducer of neurite outgrowth 2 [Source:HGNC Symbol;Acc:HGNC:23730]
ENSG00000068489	347.799	369.74	397.162	487.203	567.022	544.153	371.567	532.793	-0.518165	1.63663e-07	1.42385e-06	PRR11	protein_coding	proline rich 11 [Source:HGNC Symbol;Acc:HGNC:25619]
ENSG00000162517	989.97	974.523	1041.89	824.155	759.938	747.18	1002.13	777.091	0.364686	1.65388e-07	1.43807e-06	PEF1	protein_coding	penta-EF-hand domain containing 1 [Source:HGNC Symbol;Acc:HGNC:30009]
ENSG00000106780	122.568	129.273	130.631	223.153	196.113	253.526	127.491	224.264	-0.814915	1.65472e-07	1.43807e-06	MEGF9	protein_coding	multiple EGF like domains 9 [Source:HGNC Symbol;Acc:HGNC:3234]
ENSG00000197837	31.4276	47.9125	67.4227	126.246	114.044	116.457	48.921	118.916	-1.28355	1.65786e-07	1.44004e-06	HIST4H4	protein_coding	histone cluster 4 H4 [Source:HGNC Symbol;Acc:HGNC:20510]
ENSG00000065308	474.557	443.869	447.729	652.567	585.141	635.876	455.385	624.528	-0.457611	1.6731e-07	1.45251e-06	TRAM2	protein_coding	translocation associated membrane protein 2 [Source:HGNC Symbol;Acc:HGNC:16855]
ENSG00000108395	767.881	753.041	767.987	561.883	569.154	602.897	762.97	577.978	0.40097	1.69633e-07	1.47191e-06	TRIM37	protein_coding	tripartite motif containing 37 [Source:HGNC Symbol;Acc:HGNC:7523]
ENSG00000188895	4287.77	4238	4339.28	4971.6	4668.34	4920.05	4288.35	4853.33	-0.179355	1.71651e-07	1.48863e-06	MSL1	protein_coding	male specific lethal 1 homolog [Source:HGNC Symbol;Acc:HGNC:27905]
ENSG00000100714	4261.59	4372.7	4374.05	3747.37	3910.53	3836.9	4336.11	3831.6	0.179176	1.74582e-07	1.51326e-06	MTHFD1	protein_coding	methylenetetrahydrofolate dehydrogenase, cyclohydrolase and formyltetrahydrofolate synthetase 1 [Source:HGNC Symbol;Acc:HGNC:7432]
ENSG00000026950	646.361	720.496	649.997	850.827	894.232	900.739	672.285	881.933	-0.388975	1.75989e-07	1.52466e-06	BTN3A1	protein_coding	butyrophilin subfamily 3 member A1 [Source:HGNC Symbol;Acc:HGNC:1138]
ENSG00000090520	2202.03	2186.8	2138.56	1861.68	1889.72	1713.88	2175.8	1821.76	0.256039	1.80033e-07	1.55887e-06	DNAJB11	protein_coding	DnaJ heat shock protein family (Hsp40) member B11 [Source:HGNC Symbol;Acc:HGNC:14889]
ENSG00000116560	5333.27	5227.89	5394.87	5922	6013.42	5844.5	5318.68	5926.64	-0.156422	1.83274e-07	1.5861e-06	SFPQ	protein_coding	splicing factor proline and glutamine rich [Source:HGNC Symbol;Acc:HGNC:10774]
ENSG00000156860	2584.4	2427.27	2259.71	2853.87	2867.09	2888.75	2423.79	2869.9	-0.243578	1.86079e-07	1.60954e-06	FBRS	protein_coding	fibrosin [Source:HGNC Symbol;Acc:HGNC:20442]
ENSG00000138030	187.518	159.106	185.412	102.241	99.1223	75.2333	177.345	92.199	0.939083	1.88117e-07	1.62631e-06	KHK	protein_coding	ketohexokinase [Source:HGNC Symbol;Acc:HGNC:6315]
ENSG00000077044	1465.57	1469.92	1397.97	1184.22	1199.06	1158.39	1444.49	1180.56	0.291524	1.88439e-07	1.62824e-06	DGKD	protein_coding	diacylglycerol kinase delta [Source:HGNC Symbol;Acc:HGNC:2851]
ENSG00000116717	596.077	603.879	620.5	481.868	419.937	401.932	606.819	434.579	0.478622	1.97247e-07	1.70346e-06	GADD45A	protein_coding	growth arrest and DNA damage inducible alpha [Source:HGNC Symbol;Acc:HGNC:4095]
ENSG00000107485	1187.96	1118.26	1120.9	928.175	844.138	929.595	1142.38	900.636	0.341519	2.0139e-07	1.73833e-06	GATA3	protein_coding	GATA binding protein 3 [Source:HGNC Symbol;Acc:HGNC:4172]
ENSG00000166822	254.564	229.619	258.103	331.618	417.806	400.901	247.428	383.442	-0.630978	2.02733e-07	1.74901e-06	TMEM170A	protein_coding	transmembrane protein 170A [Source:HGNC Symbol;Acc:HGNC:29577]
ENSG00000166801	819.213	837.113	864.907	1053.53	1048.78	1080.06	840.411	1060.79	-0.336012	2.03247e-07	1.75253e-06	FAM111A	protein_coding	family with sequence similarity 111 member A [Source:HGNC Symbol;Acc:HGNC:24725]
ENSG00000152642	2228.22	2210.31	2276.57	1923.03	1860.94	1923.09	2238.36	1902.35	0.233981	2.10814e-07	1.81683e-06	GPD1L	protein_coding	glycerol-3-phosphate dehydrogenase 1 like [Source:HGNC Symbol;Acc:HGNC:28956]
ENSG00000127947	2851.53	2932.61	2967.65	3376.64	3362.7	3289.65	2917.26	3343	-0.196599	2.12338e-07	1.82901e-06	PTPN12	protein_coding	protein tyrosine phosphatase, non-receptor type 12 [Source:HGNC Symbol;Acc:HGNC:9645]
ENSG00000106344	2849.44	3083.58	3160.44	2601.38	2616.62	2543.51	3031.15	2587.17	0.228703	2.15492e-07	1.85521e-06	RBM28	protein_coding	RNA binding motif protein 28 [Source:HGNC Symbol;Acc:HGNC:21863]
ENSG00000260284	201.137	178.994	190.68	101.352	99.1223	115.426	190.27	105.3	0.853023	2.1867e-07	1.88159e-06	TPSP2	unprocessed_pseudogene	tryptase pseudogene 2 [Source:HGNC Symbol;Acc:HGNC:14136]
ENSG00000117411	1912.89	1707.68	1810.93	1498.95	1435.67	1522.19	1810.5	1485.6	0.283941	2.22429e-07	1.91294e-06	B4GALT2	protein_coding	beta-1,4-galactosyltransferase 2 [Source:HGNC Symbol;Acc:HGNC:925]
ENSG00000197448	2181.08	2059.34	2202.83	1830.57	1840.69	1733.46	2147.75	1801.57	0.252503	2.25978e-07	1.94245e-06	GSTK1	protein_coding	glutathione S-transferase kappa 1 [Source:HGNC Symbol;Acc:HGNC:16906]
ENSG00000247596	679.884	678.008	638.409	477.423	513.731	492.624	665.434	494.593	0.429697	2.26661e-07	1.9473e-06	TWF2	protein_coding	twinfilin actin binding protein 2 [Source:HGNC Symbol;Acc:HGNC:9621]
ENSG00000136270	4538.15	4527.28	4640.58	4148.34	3893.48	4049.2	4568.67	4030.34	0.179974	2.27052e-07	1.94965e-06	TBRG4	protein_coding	transforming growth factor beta regulator 4 [Source:HGNC Symbol;Acc:HGNC:17443]
ENSG00000166987	883.116	817.225	757.452	1067.76	1098.87	1007.92	819.264	1058.18	-0.369176	2.31148e-07	1.98379e-06	MBD6	protein_coding	methyl-CpG binding domain protein 6 [Source:HGNC Symbol;Acc:HGNC:20445]
ENSG00000187955	18368.4	18823.3	18722.4	17417.5	17282.5	17288.2	18638	17329.4	0.105077	2.31852e-07	1.9888e-06	COL14A1	protein_coding	collagen type XIV alpha 1 chain [Source:HGNC Symbol;Acc:HGNC:2191]
ENSG00000147697	36.6656	27.1203	31.6044	82.6822	71.4107	102.029	31.7968	85.3739	-1.43009	2.36442e-07	2.02712e-06	GSDMC	protein_coding	gasdermin C [Source:HGNC Symbol;Acc:HGNC:7151]
ENSG00000125657	113.139	132.89	127.471	55.1215	50.0941	68.0192	124.5	57.7449	1.11016	2.38667e-07	2.04514e-06	TNFSF9	protein_coding	TNF superfamily member 9 [Source:HGNC Symbol;Acc:HGNC:11939]
ENSG00000183876	128.853	131.985	126.418	61.3449	60.7524	65.958	129.085	62.6851	1.04311	2.4332e-07	2.08392e-06	ARSI	protein_coding	arylsulfatase family member I [Source:HGNC Symbol;Acc:HGNC:32521]
ENSG00000197037	693.503	703.32	720.58	545.88	545.706	485.41	705.801	525.665	0.424255	2.44455e-07	2.09161e-06	ZSCAN25	protein_coding	zinc finger and SCAN domain containing 25 [Source:HGNC Symbol;Acc:HGNC:21961]
ENSG00000041802	1435.19	1536.82	1427.47	1747.88	1750.09	1812.81	1466.49	1770.26	-0.27024	2.44471e-07	2.09161e-06	LSG1	protein_coding	large 60S subunit nuclear export GTPase 1 [Source:HGNC Symbol;Acc:HGNC:25652]
ENSG00000108528	1442.53	1482.58	1452.75	1221.56	1206.52	1163.54	1459.28	1197.21	0.285477	2.45354e-07	2.09808e-06	SLC25A11	protein_coding	solute carrier family 25 member 11 [Source:HGNC Symbol;Acc:HGNC:10981]
ENSG00000175985	80.6642	83.1689	106.401	40.8966	36.2383	20.6119	90.0782	32.5822	1.45843	2.4584e-07	2.10115e-06	PLEKHD1	protein_coding	pleckstrin homology and coiled-coil domain containing D1 [Source:HGNC Symbol;Acc:HGNC:20148]
ENSG00000166272	766.834	764.793	754.291	977.962	997.618	936.81	761.973	970.796	-0.34934	2.5121e-07	2.14495e-06	WBP1L	protein_coding	WW domain binding protein 1 like [Source:HGNC Symbol;Acc:HGNC:23510]
ENSG00000103415	1350.34	1394.89	1415.88	1158.44	1102.07	1130.56	1387.03	1130.36	0.294555	2.51224e-07	2.14495e-06	HMOX2	protein_coding	heme oxygenase 2 [Source:HGNC Symbol;Acc:HGNC:5014]
ENSG00000164070	801.404	843.442	813.286	579.665	662.947	626.601	819.377	623.071	0.397869	2.53479e-07	2.16308e-06	HSPA4L	protein_coding	heat shock protein family A (Hsp70) member 4 like [Source:HGNC Symbol;Acc:HGNC:17041]
ENSG00000163931	16448.2	16425.9	16418.5	15412.7	15297.9	14701.4	16430.8	15137.3	0.118106	2.55646e-07	2.18044e-06	TKT	protein_coding	transketolase [Source:HGNC Symbol;Acc:HGNC:11834]
ENSG00000126882	293.324	270.299	284.44	192.036	168.401	166.956	282.688	175.798	0.681374	2.57124e-07	2.19192e-06	FAM78A	protein_coding	family with sequence similarity 78 member A [Source:HGNC Symbol;Acc:HGNC:25465]
ENSG00000127463	1916.04	2057.53	2012.15	1598.52	1674.42	1725.21	1995.24	1666.05	0.261638	2.59458e-07	2.21068e-06	EMC1	protein_coding	ER membrane protein complex subunit 1 [Source:HGNC Symbol;Acc:HGNC:28957]
ENSG00000152601	1629	1639.87	1559.15	1932.81	1948.34	1874.65	1609.34	1918.6	-0.253172	2.59819e-07	2.21261e-06	MBNL1	protein_coding	muscleblind like splicing regulator 1 [Source:HGNC Symbol;Acc:HGNC:6923]
ENSG00000205542	6012.1	5984.55	6037.49	5539.71	5381.38	5129.26	6011.38	5350.12	0.167485	2.67843e-07	2.27977e-06	TMSB4X	protein_coding	thymosin beta 4 X-linked [Source:HGNC Symbol;Acc:HGNC:11881]
ENSG00000135924	862.164	871.466	872.281	1133.55	1083.95	1057.39	868.637	1091.63	-0.330469	2.70058e-07	2.29744e-06	DNAJB2	protein_coding	DnaJ heat shock protein family (Hsp40) member B2 [Source:HGNC Symbol;Acc:HGNC:5228]
ENSG00000169016	561.507	559.582	518.312	422.302	369.843	374.105	546.467	388.75	0.489292	2.71176e-07	2.30576e-06	E2F6	protein_coding	E2F transcription factor 6 [Source:HGNC Symbol;Acc:HGNC:3120]
ENSG00000102978	1419.48	1434.66	1403.24	1709.65	1712.79	1678.84	1419.13	1700.43	-0.260684	2.73088e-07	2.32083e-06	POLR2C	protein_coding	RNA polymerase II subunit C [Source:HGNC Symbol;Acc:HGNC:9189]
ENSG00000090273	1736.9	1691.4	1771.95	1474.06	1445.27	1406.76	1733.42	1442.03	0.264438	2.7361e-07	2.32407e-06	NUDC	protein_coding	nuclear distribution C, dynein complex regulator [Source:HGNC Symbol;Acc:HGNC:8045]
ENSG00000157107	429.511	436.637	435.087	625.006	570.22	583.316	433.745	592.847	-0.452041	2.79509e-07	2.37295e-06	FCHO2	protein_coding	FCH domain only 2 [Source:HGNC Symbol;Acc:HGNC:25180]
ENSG00000214655	2161.17	2026.79	2077.46	2415.57	2409.84	2537.32	2088.48	2454.24	-0.233251	2.82254e-07	2.39503e-06	ZSWIM8	protein_coding	zinc finger SWIM-type containing 8 [Source:HGNC Symbol;Acc:HGNC:23528]
ENSG00000243147	1079.01	1007.07	1151.45	903.281	736.489	805.924	1079.18	815.232	0.401152	2.85815e-07	2.424e-06	MRPL33	protein_coding	mitochondrial ribosomal protein L33 [Source:HGNC Symbol;Acc:HGNC:14487]
ENSG00000116521	1626.9	1614.56	1566.52	1372.7	1319.5	1268.66	1602.66	1320.29	0.278837	2.89183e-07	2.45131e-06	SCAMP3	protein_coding	secretory carrier membrane protein 3 [Source:HGNC Symbol;Acc:HGNC:10565]
ENSG00000205581	5752.3	5864.31	6166.02	6802.17	6497.31	6641.15	5927.54	6646.87	-0.165832	2.92012e-07	2.47401e-06	HMGN1	protein_coding	high mobility group nucleosome binding domain 1 [Source:HGNC Symbol;Acc:HGNC:4984]
ENSG00000156017	742.739	772.025	713.206	558.327	542.508	583.316	742.657	561.384	0.404552	2.92939e-07	2.4806e-06	CARNMT1	protein_coding	carnosine N-methyltransferase 1 [Source:HGNC Symbol;Acc:HGNC:23435]
ENSG00000167528	249.326	217.866	232.819	360.068	336.803	360.708	233.337	352.526	-0.597901	3.07342e-07	2.60123e-06	ZNF641	protein_coding	zinc finger protein 641 [Source:HGNC Symbol;Acc:HGNC:31834]
ENSG00000100784	570.935	588.511	569.933	759.254	763.135	744.089	576.459	755.493	-0.389665	3.08034e-07	2.60575e-06	RPS6KA5	protein_coding	ribosomal protein S6 kinase A5 [Source:HGNC Symbol;Acc:HGNC:10434]
ENSG00000168172	863.212	891.354	891.244	678.35	713.041	663.702	881.937	685.031	0.365252	3.08795e-07	2.61085e-06	HOOK3	protein_coding	hook microtubule tethering protein 3 [Source:HGNC Symbol;Acc:HGNC:23576]
ENSG00000102287	5890.58	5968.28	5776.23	5369.9	5244.96	5230.26	5878.36	5281.71	0.154342	3.11901e-07	2.63576e-06	GABRE	protein_coding	gamma-aminobutyric acid type A receptor epsilon subunit [Source:HGNC Symbol;Acc:HGNC:4085]
ENSG00000073910	522.746	555.966	525.686	740.584	691.724	700.804	534.8	711.037	-0.410906	3.12282e-07	2.63763e-06	FRY	protein_coding	FRY microtubule binding protein [Source:HGNC Symbol;Acc:HGNC:20367]
[truncated: 3,373 more rows]
